# Supplementary material for: Postnatal Sustentacular Cells as Chromaffin Progenitors and Tumor Cells of Origin in VHL-Related Paragangliomas
Source: Research Square preprint supplement (doi:10.21203/rs.3.rs-6907400/v1), 2025-07-08
Supplement: Supplementary file 1 [file cd57bae37fddf0770456b783.xlsx]

## Sheet: Supplementary Table S1
Supplementary Table S1. Specific differentially expressed gene list of mouse clusters.
gene	cluster	mean_log2FC	mean_pval	mean_pval.adj	pct.1	mean_pct.2	others.pval	others.padj	others.log2FC	others.pct.2
Ly6h	(0) E ADR Chromaffin	5.53054	2.27868e-12	8.72005e-08	0.875	0.131579	(1) PN NOR Chromaffin: 5.9902139729325e-261| (2) PN ADR Chromaffin: 4.59133464851072e-148| (3) Endothelial: 6.91285423654556e-206| (4) Macrophage: 7.86528605685455e-199| (5) E NOR Chromaffin: 4.37452652969548e-78| (6) E Glia|SCP: 2.20953172599657e-152| (7) Cortex ZG: 8.53746146883136e-152| (8) Cycling TH+: 2.52670951434028e-42| (9) Cortex X Zone: 5.06454241144584e-115| (10) E Neuroblast: 4.329413…	(1) PN NOR Chromaffin: 2.29233508316181e-256| (2) PN ADR Chromaffin: 1.75701194329208e-143| (3) Endothelial: 2.64541105924125e-201| (4) Macrophage: 3.0098876682371e-194| (5) E NOR Chromaffin: 1.67404381238387e-73| (6) E Glia|SCP: 8.45543600904367e-148| (7) Cortex ZG: 3.26711575489239e-147| (8) Cycling TH+: 9.6692119694774e-38| (9) Cortex X Zone: 1.93809909001209e-110| (10) E Neuroblast: 1.6567798…	(1) PN NOR Chromaffin: 5.76895856757883| (2) PN ADR Chromaffin: 2.54059732652091| (3) Endothelial: 7.44822193246794| (4) Macrophage: 9.14984191193863| (5) E NOR Chromaffin: 1.79848172935764| (6) E Glia|SCP: 6.39009296810036| (7) Cortex ZG: 7.38272055399928| (8) Cycling TH+: 1.43441535995234| (9) Cortex X Zone: 4.37227093589812| (10) E Neuroblast: 0.598162401835283| (11) PN Sustentacular: 7.835663…	(1) PN NOR Chromaffin: 0.05| (2) PN ADR Chromaffin: 0.377| (3) Endothelial: 0.012| (4) Macrophage: 0| (5) E NOR Chromaffin: 0.445| (6) E Glia|SCP: 0.032| (7) Cortex ZG: 0.01| (8) Cycling TH+: 0.618| (9) Cortex X Zone: 0.182| (10) E Neuroblast: 0.745| (11) PN Sustentacular: 0| (12) Cortex ZF: 0| (13) Macrophage: 0.019| (14) Cortex ZG: 0.01| (15) Dendritic cell: 0| (16) T cell: 0| (17) NK cell: 0| …
Col7a1	(0) E ADR Chromaffin	4.97348	2.17236e-17	8.31321e-13	0.893	0.146632	(1) PN NOR Chromaffin: 2.65808536739309e-235| (2) PN ADR Chromaffin: 3.86371074580238e-30| (3) Endothelial: 8.48420352090946e-211| (4) Macrophage: 1.55836773834911e-199| (5) E NOR Chromaffin: 8.41433222185555e-143| (6) E Glia|SCP: 1.14928739730647e-153| (7) Cortex ZG: 3.90504975118411e-156| (8) Cycling TH+: 4.96841833779344e-80| (9) Cortex X Zone: 4.32643476036539e-135| (10) E Neuroblast: 6.26062…	(1) PN NOR Chromaffin: 1.01719610839399e-230| (2) PN ADR Chromaffin: 1.47856482820365e-25| (3) Endothelial: 3.24673500338163e-206| (4) Macrophage: 5.96356166111439e-195| (5) E NOR Chromaffin: 3.21999665465968e-138| (6) E Glia|SCP: 4.39809301201238e-149| (7) Cortex ZG: 1.49438443878313e-151| (8) Cycling TH+: 1.90131432950679e-75| (9) Cortex X Zone: 1.65564005409663e-130| (10) E Neuroblast: 2.39581…	(1) PN NOR Chromaffin: 4.28374136696765| (2) PN ADR Chromaffin: 0.719433063067129| (3) Endothelial: 7.33235825831741| (4) Macrophage: 6.46902255249426| (5) E NOR Chromaffin: 3.35895110055117| (6) E Glia|SCP: 5.63793793361881| (7) Cortex ZG: 7.21302260871737| (8) Cycling TH+: 2.15867814627542| (9) Cortex X Zone: 6.39032578806389| (10) E Neuroblast: 2.64908048531754| (11) PN Sustentacular: 4.224916…	(1) PN NOR Chromaffin: 0.194| (2) PN ADR Chromaffin: 0.8| (3) Endothelial: 0.032| (4) Macrophage: 0.025| (5) E NOR Chromaffin: 0.203| (6) E Glia|SCP: 0.073| (7) Cortex ZG: 0.025| (8) Cycling TH+: 0.439| (9) Cortex X Zone: 0.062| (10) E Neuroblast: 0.291| (11) PN Sustentacular: 0.085| (12) Cortex ZF: 0.082| (13) Macrophage: 0.124| (14) Cortex ZG: 0.068| (15) Dendritic cell: 0.051| (16) T cell: 0.0…
Myrip	(0) E ADR Chromaffin	5.85616	4.25461e-15	1.62815e-10	0.831	0.0919474	(1) PN NOR Chromaffin: 7.03442956011064e-233| (2) PN ADR Chromaffin: 7.13906154931597e-56| (3) Endothelial: 4.70924610584106e-172| (4) Macrophage: 4.19648936189503e-182| (5) E NOR Chromaffin: 5.5161070901914e-120| (6) E Glia|SCP: 4.53312086541469e-136| (7) Cortex ZG: 3.32602351009167e-140| (8) Cycling TH+: 1.2198032666442e-69| (9) Cortex X Zone: 3.37612793074144e-121| (10) E Neuroblast: 3.0229585…	(1) PN NOR Chromaffin: 2.69193550406314e-228| (2) PN ADR Chromaffin: 2.73197607369223e-51| (3) Endothelial: 1.80213429978326e-167| (4) Macrophage: 1.60591254900999e-177| (5) E NOR Chromaffin: 2.11090386127445e-115| (6) E Glia|SCP: 1.73473469277689e-131| (7) Cortex ZG: 1.27280267684188e-135| (8) Cycling TH+: 4.66794314079403e-65| (9) Cortex X Zone: 1.29197663653613e-116| (10) E Neuroblast: 1.15682…	(1) PN NOR Chromaffin: 5.53832572665107| (2) PN ADR Chromaffin: 1.30430719744431| (3) Endothelial: 4.5465446882241| (4) Macrophage: 9.16202269942639| (5) E NOR Chromaffin: 3.30597905338052| (6) E Glia|SCP: 5.77490507757231| (7) Cortex ZG: 8.61969832379251| (8) Cycling TH+: 2.35709536048235| (9) Cortex X Zone: 7.10748378428507| (10) E Neuroblast: 3.25291226015526| (11) PN Sustentacular: 7.81442427…	(1) PN NOR Chromaffin: 0.07| (2) PN ADR Chromaffin: 0.566| (3) Endothelial: 0.052| (4) Macrophage: 0.004| (5) E NOR Chromaffin: 0.183| (6) E Glia|SCP: 0.044| (7) Cortex ZG: 0.003| (8) Cycling TH+: 0.356| (9) Cortex X Zone: 0.018| (10) E Neuroblast: 0.175| (11) PN Sustentacular: 0.022| (12) Cortex ZF: 0.018| (13) Macrophage: 0.038| (14) Cortex ZG: 0.049| (15) Dendritic cell: 0| (16) T cell: 0.011|…
RP24-175N4.1	(0) E ADR Chromaffin	5.40855	2.95547e-21	1.131e-16	0.995	0.308474	(1) PN NOR Chromaffin: 1.20442198671551e-221| (2) PN ADR Chromaffin: 3.06434372283205e-93| (3) Endothelial: 1.51834720825271e-256| (4) Macrophage: 4.24583631928306e-245| (5) E NOR Chromaffin: 8.11025313925327e-163| (6) E Glia|SCP: 1.35559126392989e-187| (7) Cortex ZG: 4.01502259344377e-190| (8) Cycling TH+: 1.06194676548429e-54| (9) Cortex X Zone: 2.12194025604854e-168| (10) E Neuroblast: 1.49704…	(1) PN NOR Chromaffin: 4.60908205876293e-217| (2) PN ADR Chromaffin: 1.17266305585337e-88| (3) Endothelial: 5.81041109654147e-252| (4) Macrophage: 1.62479664266324e-240| (5) E NOR Chromaffin: 3.10363167132944e-158| (6) E Glia|SCP: 5.18757664880692e-183| (7) Cortex ZG: 1.53646884605906e-185| (8) Cycling TH+: 4.06385788215527e-50| (9) Cortex X Zone: 8.12024097184655e-164| (10) E Neuroblast: 5.72890…	(1) PN NOR Chromaffin: 1.80124609734836| (2) PN ADR Chromaffin: 0.76060525038635| (3) Endothelial: 8.01331894106488| (4) Macrophage: 9.2127322230167| (5) E NOR Chromaffin: 2.19897714792883| (6) E Glia|SCP: 3.89072041972064| (7) Cortex ZG: 6.98692865444007| (8) Cycling TH+: 0.860810478960078| (9) Cortex X Zone: 7.16288814075115| (10) E Neuroblast: 0.843156549532875| (11) PN Sustentacular: 4.448156…	(1) PN NOR Chromaffin: 0.839| (2) PN ADR Chromaffin: 0.977| (3) Endothelial: 0.042| (4) Macrophage: 0.054| (5) E NOR Chromaffin: 0.648| (6) E Glia|SCP: 0.471| (7) Cortex ZG: 0.04| (8) Cycling TH+: 0.939| (9) Cortex X Zone: 0.097| (10) E Neuroblast: 0.865| (11) PN Sustentacular: 0.259| (12) Cortex ZF: 0.064| (13) Macrophage: 0.143| (14) Cortex ZG: 0.039| (15) Dendritic cell: 0.051| (16) T cell: 0.…
Cox4i2	(0) E ADR Chromaffin	4.96164	1.366e-15	5.22741e-11	0.825	0.118053	(1) PN NOR Chromaffin: 1.0169384320399e-208| (2) PN ADR Chromaffin: 1.42215950148494e-106| (3) Endothelial: 2.84294560638591e-182| (4) Macrophage: 1.1379439059804e-177| (5) E NOR Chromaffin: 1.19291086316113e-35| (6) E Glia|SCP: 1.9179438426153e-109| (7) Cortex ZG: 1.88183476797478e-137| (8) Cycling TH+: 2.93601641039442e-59| (9) Cortex X Zone: 1.48290545415561e-120| (10) E Neuroblast: 1.88792001…	(1) PN NOR Chromaffin: 3.8916199917303e-204| (2) PN ADR Chromaffin: 5.44231998028256e-102| (3) Endothelial: 1.08793842465176e-177| (4) Macrophage: 4.3546837394058e-173| (5) E NOR Chromaffin: 4.565031291145e-31| (6) E Glia|SCP: 7.33958749692024e-105| (7) Cortex ZG: 7.20140529008589e-133| (8) Cycling TH+: 1.12355475992974e-54| (9) Cortex X Zone: 5.6747825919627e-116| (10) E Neuroblast: 7.2246923044…	(1) PN NOR Chromaffin: 4.3848755314192| (2) PN ADR Chromaffin: 2.2063497427011| (3) Endothelial: 6.34207532974399| (4) Macrophage: 7.77608187513158| (5) E NOR Chromaffin: 0.701092384460173| (6) E Glia|SCP: 3.66558163613468| (7) Cortex ZG: 7.35848731047297| (8) Cycling TH+: 1.85076189825441| (9) Cortex X Zone: 7.32402505081648| (10) E Neuroblast: 4.45772993508271| (11) PN Sustentacular: 3.29549807…	(1) PN NOR Chromaffin: 0.133| (2) PN ADR Chromaffin: 0.461| (3) Endothelial: 0.029| (4) Macrophage: 0.018| (5) E NOR Chromaffin: 0.449| (6) E Glia|SCP: 0.182| (7) Cortex ZG: 0.008| (8) Cycling TH+: 0.385| (9) Cortex X Zone: 0.015| (10) E Neuroblast: 0.112| (11) PN Sustentacular: 0.174| (12) Cortex ZF: 0.009| (13) Macrophage: 0.038| (14) Cortex ZG: 0.019| (15) Dendritic cell: 0| (16) T cell: 0.034…
Hs3st6	(0) E ADR Chromaffin	5.68	1.49767e-16	5.73127e-12	0.857	0.106579	(1) PN NOR Chromaffin: 5.75304302073526e-203| (2) PN ADR Chromaffin: 7.54201358815651e-61| (3) Endothelial: 4.4214574049113e-200| (4) Macrophage: 2.25053771704618e-190| (5) E NOR Chromaffin: 6.18331450855491e-76| (6) E Glia|SCP: 6.96835010488019e-148| (7) Cortex ZG: 1.21069314096833e-146| (8) Cycling TH+: 3.40336215379784e-48| (9) Cortex X Zone: 6.80293572149908e-130| (10) E Neuroblast: 1.6701074…	(1) PN NOR Chromaffin: 2.20157450317497e-198| (2) PN ADR Chromaffin: 2.88617775991573e-56| (3) Endothelial: 1.69200331971146e-195| (4) Macrophage: 8.61235773559234e-186| (5) E NOR Chromaffin: 2.36623079613379e-71| (6) E Glia|SCP: 2.66664821813555e-143| (7) Cortex ZG: 4.63308051185762e-142| (8) Cycling TH+: 1.30239862901536e-43| (9) Cortex X Zone: 2.60334744190327e-125| (10) E Neuroblast: 6.391167…	(1) PN NOR Chromaffin: 3.51704122610762| (2) PN ADR Chromaffin: 1.1909659323933| (3) Endothelial: 8.05543738477556| (4) Macrophage: 7.90201545330762| (5) E NOR Chromaffin: 1.70270849527912| (6) E Glia|SCP: 6.58591844713854| (7) Cortex ZG: 7.59563695980277| (8) Cycling TH+: 1.37916543522125| (9) Cortex X Zone: 8.12625980670177| (10) E Neuroblast: 3.37503468525992| (11) PN Sustentacular: 7.02304323…	(1) PN NOR Chromaffin: 0.193| (2) PN ADR Chromaffin: 0.632| (3) Endothelial: 0.007| (4) Macrophage: 0.007| (5) E NOR Chromaffin: 0.372| (6) E Glia|SCP: 0.027| (7) Cortex ZG: 0.01| (8) Cycling TH+: 0.468| (9) Cortex X Zone: 0.003| (10) E Neuroblast: 0.195| (11) PN Sustentacular: 0.004| (12) Cortex ZF: 0| (13) Macrophage: 0.01| (14) Cortex ZG: 0.019| (15) Dendritic cell: 0.02| (16) T cell: 0| (17) …
Cdh4	(0) E ADR Chromaffin	4.24251	3.36406e-12	1.28736e-07	0.769	0.159842	(1) PN NOR Chromaffin: 1.41746516899509e-180| (2) PN ADR Chromaffin: 1.66508875232815e-21| (3) Endothelial: 3.27185143694743e-131| (4) Macrophage: 1.9633549295583e-150| (5) E NOR Chromaffin: 9.71260091590863e-119| (6) E Glia|SCP: 6.44736285068789e-114| (7) Cortex ZG: 2.4661991032688e-113| (8) Cycling TH+: 1.46424200469037e-19| (9) Cortex X Zone: 2.97064598283928e-94| (10) E Neuroblast: 6.48145618…	(1) PN NOR Chromaffin: 5.4243557087104e-176| (2) PN ADR Chromaffin: 6.37196163740936e-17| (3) Endothelial: 1.25207210789104e-126| (4) Macrophage: 7.51336664443368e-146| (5) E NOR Chromaffin: 3.71681811849991e-114| (6) E Glia|SCP: 2.46727681570124e-109| (7) Cortex ZG: 9.43765072838905e-109| (8) Cycling TH+: 5.60336130354912e-15| (9) Cortex X Zone: 1.13680680471294e-89| (10) E Neuroblast: 2.4803236…	(1) PN NOR Chromaffin: 4.73645404913199| (2) PN ADR Chromaffin: 0.833675485792268| (3) Endothelial: 3.48466991160426| (4) Macrophage: 6.05864330394687| (5) E NOR Chromaffin: 4.37883828738173| (6) E Glia|SCP: 5.36007266014803| (7) Cortex ZG: 5.42262953790111| (8) Cycling TH+: 0.978930898975605| (9) Cortex X Zone: 5.06771687453934| (10) E Neuroblast: 1.06872000991078| (11) PN Sustentacular: 4.52824…	(1) PN NOR Chromaffin: 0.138| (2) PN ADR Chromaffin: 0.609| (3) Endothelial: 0.12| (4) Macrophage: 0.048| (5) E NOR Chromaffin: 0.128| (6) E Glia|SCP: 0.075| (7) Cortex ZG: 0.055| (8) Cycling TH+: 0.535| (9) Cortex X Zone: 0.1| (10) E Neuroblast: 0.442| (11) PN Sustentacular: 0.129| (12) Cortex ZF: 0.091| (13) Macrophage: 0.067| (14) Cortex ZG: 0.087| (15) Dendritic cell: 0.061| (16) T cell: 0.09…
Igf2	(0) E ADR Chromaffin	3.00473	3.53932e-10	1.35443e-05	0.631	0.103	(1) PN NOR Chromaffin: 5.96680309820594e-158| (2) PN ADR Chromaffin: 2.82323264331379e-61| (3) Endothelial: 5.69731607878982e-99| (4) Macrophage: 3.5857975255536e-118| (5) E NOR Chromaffin: 1.25083178997601e-13| (6) E Glia|SCP: 1.27174411181167e-35| (7) Cortex ZG: 2.41649432130178e-80| (8) Cycling TH+: 4.02263619896863e-26| (9) Cortex X Zone: 1.78982308693314e-77| (10) E Neuroblast: 3.79510587249…	(1) PN NOR Chromaffin: 2.28337620962145e-153| (2) PN ADR Chromaffin: 1.08039466794332e-56| (3) Endothelial: 2.18024891703129e-94| (4) Macrophage: 1.37221299707885e-113| (5) E NOR Chromaffin: 4.78668309388021e-09| (6) E Glia|SCP: 4.86671036708089e-31| (7) Cortex ZG: 9.24744046875766e-76| (8) Cycling TH+: 1.53938242062132e-21| (9) Cortex X Zone: 6.84929498907575e-73| (10) E Neuroblast: 1.4523111152…	(1) PN NOR Chromaffin: 5.11910934924613| (2) PN ADR Chromaffin: 1.88968194521752| (3) Endothelial: 1.88490087165781| (4) Macrophage: 5.88333770647873| (5) E NOR Chromaffin: 0.562346916427461| (6) E Glia|SCP: 1.61755505066078| (7) Cortex ZG: 3.62698564774082| (8) Cycling TH+: 1.50892321361359| (9) Cortex X Zone: 5.13304308851937| (10) E Neuroblast: 2.66125340731909| (11) PN Sustentacular: 3.385570…	(1) PN NOR Chromaffin: 0.034| (2) PN ADR Chromaffin: 0.27| (3) Endothelial: 0.052| (4) Macrophage: 0.009| (5) E NOR Chromaffin: 0.421| (6) E Glia|SCP: 0.286| (7) Cortex ZG: 0.035| (8) Cycling TH+: 0.34| (9) Cortex X Zone: 0.015| (10) E Neuroblast: 0.203| (11) PN Sustentacular: 0.04| (12) Cortex ZF: 0| (13) Macrophage: 0.029| (14) Cortex ZG: 0| (15) Dendritic cell: 0| (16) T cell: 0.057| (17) NK c…
Gipr	(0) E ADR Chromaffin	5.71181	1.2484e-10	4.77737e-06	0.63	0.0418947	(1) PN NOR Chromaffin: 1.15273498204212e-157| (2) PN ADR Chromaffin: 3.01080588184659e-117| (3) Endothelial: 8.64649518745724e-124| (4) Macrophage: 5.11792990653029e-118| (5) E NOR Chromaffin: 7.79829076949227e-27| (6) E Glia|SCP: 1.53342766797309e-88| (7) Cortex ZG: 1.7676105179773e-89| (8) Cycling TH+: 3.27412691662624e-62| (9) Cortex X Zone: 3.49059892669848e-77| (10) E Neuroblast: 8.219260354…	(1) PN NOR Chromaffin: 4.4112862292788e-153| (2) PN ADR Chromaffin: 1.15217519486505e-112| (3) Endothelial: 3.30884077833614e-119| (4) Macrophage: 1.95852941663101e-113| (5) E NOR Chromaffin: 2.9842499116693e-22| (6) E Glia|SCP: 5.86812099979942e-84| (7) Cortex ZG: 6.76429193019552e-85| (8) Cycling TH+: 1.25294288845453e-57| (9) Cortex X Zone: 1.33578239726897e-72| (10) E Neuroblast: 3.1453465524…	(1) PN NOR Chromaffin: 6.01483882077353| (2) PN ADR Chromaffin: 3.28921535230084| (3) Endothelial: 7.10211830015187| (4) Macrophage: 7.92584969204916| (5) E NOR Chromaffin: 1.10471803451996| (6) E Glia|SCP: 6.35301078397501| (7) Cortex ZG: 7.73337627584987| (8) Cycling TH+: 3.44963975668974| (9) Cortex X Zone: 6.65564111479684| (10) E Neuroblast: 4.41384244490373| (11) PN Sustentacular: 6.6250228…	(1) PN NOR Chromaffin: 0.039| (2) PN ADR Chromaffin: 0.123| (3) Endothelial: 0.008| (4) Macrophage: 0.009| (5) E NOR Chromaffin: 0.323| (6) E Glia|SCP: 0.027| (7) Cortex ZG: 0.01| (8) Cycling TH+: 0.131| (9) Cortex X Zone: 0.015| (10) E Neuroblast: 0.06| (11) PN Sustentacular: 0.013| (12) Cortex ZF: 0.018| (13) Macrophage: 0| (14) Cortex ZG: 0.01| (15) Dendritic cell: 0.01| (16) T cell: 0| (17) N…
RP24-144C10.1	(0) E ADR Chromaffin	3.9973	9.2507e-09	0.000354006	0.536	0.0526316	(1) PN NOR Chromaffin: 2.54771698850722e-124| (2) PN ADR Chromaffin: 1.82150822649365e-40| (3) Endothelial: 3.7918296035833e-91| (4) Macrophage: 2.06329260675425e-95| (5) E NOR Chromaffin: 2.69914284390934e-58| (6) E Glia|SCP: 1.10203363063317e-65| (7) Cortex ZG: 1.49891058095821e-68| (8) Cycling TH+: 1.64282551323686e-37| (9) Cortex X Zone: 2.55708982905543e-49| (10) E Neuroblast: 1.891921117302…	(1) PN NOR Chromaffin: 9.74960337161941e-120| (2) PN ADR Chromaffin: 6.97054768114591e-36| (3) Endothelial: 1.45105735269926e-86| (4) Macrophage: 7.89580814752717e-91| (5) E NOR Chromaffin: 1.03290798350723e-53| (6) E Glia|SCP: 4.21726229770702e-61| (7) Cortex ZG: 5.73603101121089e-64| (8) Cycling TH+: 6.28676467405483e-33| (9) Cortex X Zone: 9.78547135782933e-45| (10) E Neuroblast: 7.24000373169…	(1) PN NOR Chromaffin: 4.96940645113874| (2) PN ADR Chromaffin: 1.40181254276887| (3) Endothelial: 4.53081619882768| (4) Macrophage: 7.24393570372591| (5) E NOR Chromaffin: 3.03324206160616| (6) E Glia|SCP: 3.91735141093777| (7) Cortex ZG: 5.3811279678646| (8) Cycling TH+: 2.43420269547047| (9) Cortex X Zone: 3.6587642289842| (10) E Neuroblast: 1.97888647396238| (11) PN Sustentacular: 3.301466725…	(1) PN NOR Chromaffin: 0.032| (2) PN ADR Chromaffin: 0.245| (3) Endothelial: 0.027| (4) Macrophage: 0.002| (5) E NOR Chromaffin: 0.106| (6) E Glia|SCP: 0.029| (7) Cortex ZG: 0.015| (8) Cycling TH+: 0.163| (9) Cortex X Zone: 0.074| (10) E Neuroblast: 0.155| (11) PN Sustentacular: 0.04| (12) Cortex ZF: 0.009| (13) Macrophage: 0.029| (14) Cortex ZG: 0.01| (15) Dendritic cell: 0| (16) T cell: 0.034| …
Necab2	(0) E ADR Chromaffin	6.22427	5.14316e-19	1.96818e-14	0.935	0.179	(1) PN NOR Chromaffin: 1.57552805175395e-108| (2) PN ADR Chromaffin: 3.84350067528062e-115| (3) Endothelial: 4.72893431913801e-229| (4) Macrophage: 9.27757261110341e-220| (5) E NOR Chromaffin: 1.82670398286333e-43| (6) E Glia|SCP: 9.276096632548e-173| (7) Cortex ZG: 1.55420454147582e-167| (8) Cycling TH+: 2.20714945674604e-43| (9) Cortex X Zone: 1.12793563410344e-149| (10) E Neuroblast: 2.4730407…	(1) PN NOR Chromaffin: 6.02923074845202e-104| (2) PN ADR Chromaffin: 1.47083083841639e-110| (3) Endothelial: 1.80966858524774e-224| (4) Macrophage: 3.55034148681705e-215| (5) E NOR Chromaffin: 6.99043080162139e-39| (6) E Glia|SCP: 3.54977665934347e-168| (7) Cortex ZG: 5.94762993931966e-163| (8) Cycling TH+: 8.44631954107574e-39| (9) Cortex X Zone: 4.31638408458704e-145| (10) E Neuroblast: 9.46383…	(1) PN NOR Chromaffin: 1.48134047083667| (2) PN ADR Chromaffin: 1.6001040221821| (3) Endothelial: 9.30173127538765| (4) Macrophage: 8.5483759429649| (5) E NOR Chromaffin: 0.940784418891843| (6) E Glia|SCP: 7.39326179179508| (7) Cortex ZG: 6.75537177423284| (8) Cycling TH+: 1.13010440713721| (9) Cortex X Zone: 8.01856627810135| (10) E Neuroblast: 3.63383160485662| (11) PN Sustentacular: 7.13462038…	(1) PN NOR Chromaffin: 0.615| (2) PN ADR Chromaffin: 0.731| (3) Endothelial: 0.045| (4) Macrophage: 0.02| (5) E NOR Chromaffin: 0.669| (6) E Glia|SCP: 0.056| (7) Cortex ZG: 0.053| (8) Cycling TH+: 0.65| (9) Cortex X Zone: 0.047| (10) E Neuroblast: 0.259| (11) PN Sustentacular: 0.058| (12) Cortex ZF: 0.045| (13) Macrophage: 0.029| (14) Cortex ZG: 0.039| (15) Dendritic cell: 0.04| (16) T cell: 0.01…
Sh3glb2	(0) E ADR Chromaffin	2.55836	3.48833e-20	1.33492e-15	0.978	0.513842	(1) PN NOR Chromaffin: 1.92869277920225e-75| (2) PN ADR Chromaffin: 3.84787077634858e-77| (3) Endothelial: 8.03757575481601e-165| (4) Macrophage: 6.06365128217506e-217| (5) E NOR Chromaffin: 7.71496140655623e-40| (6) E Glia|SCP: 1.30563791169113e-111| (7) Cortex ZG: 9.08148204224203e-126| (8) Cycling TH+: 8.3737890486158e-83| (9) Cortex X Zone: 3.65761125278179e-117| (10) E Neuroblast: 8.85784993…	(1) PN NOR Chromaffin: 7.38072152745116e-71| (2) PN ADR Chromaffin: 1.47250318869308e-72| (3) Endothelial: 3.07581948985299e-160| (4) Macrophage: 2.32043807266275e-212| (5) E NOR Chromaffin: 2.95236143106094e-35| (6) E Glia|SCP: 4.99641516045963e-107| (7) Cortex ZG: 3.47530154792518e-121| (8) Cycling TH+: 3.20448159312429e-78| (9) Cortex X Zone: 1.39969467421454e-112| (10) E Neuroblast: 3.3897220…	(1) PN NOR Chromaffin: 0.895902648781597| (2) PN ADR Chromaffin: 0.907831405579966| (3) Endothelial: 2.40146178686427| (4) Macrophage: 4.31985380276642| (5) E NOR Chromaffin: 0.716927048480078| (6) E Glia|SCP: 1.91014530627223| (7) Cortex ZG: 2.15862267545802| (8) Cycling TH+: 1.46140643994276| (9) Cortex X Zone: 2.2833711152454| (10) E Neuroblast: 0.861031264786792| (11) PN Sustentacular: 2.9556…	(1) PN NOR Chromaffin: 0.908| (2) PN ADR Chromaffin: 0.915| (3) Endothelial: 0.364| (4) Macrophage: 0.203| (5) E NOR Chromaffin: 0.907| (6) E Glia|SCP: 0.614| (7) Cortex ZG: 0.644| (8) Cycling TH+: 0.783| (9) Cortex X Zone: 0.674| (10) E Neuroblast: 0.825| (11) PN Sustentacular: 0.317| (12) Cortex ZF: 0.8| (13) Macrophage: 0.295| (14) Cortex ZG: 0.602| (15) Dendritic cell: 0.121| (16) T cell: 0.2…
Sctr	(0) E ADR Chromaffin	5.82246	4.864e-16	1.86136e-11	0.868	0.160895	(1) PN NOR Chromaffin: 5.41617198842242e-70| (2) PN ADR Chromaffin: 7.99993261668744e-15| (3) Endothelial: 5.65728552266862e-200| (4) Macrophage: 3.51986188115525e-195| (5) E NOR Chromaffin: 3.90803796504819e-110| (6) E Glia|SCP: 2.5746660349338e-144| (7) Cortex ZG: 3.18403394775254e-150| (8) Cycling TH+: 6.63437069639236e-76| (9) Cortex X Zone: 1.38822621610534e-127| (10) E Neuroblast: 2.9870304…	(1) PN NOR Chromaffin: 2.07266069652949e-65| (2) PN ADR Chromaffin: 3.06141421375395e-10| (3) Endothelial: 2.16493002381483e-195| (4) Macrophage: 1.34698074468049e-190| (5) E NOR Chromaffin: 1.49552796846464e-105| (6) E Glia|SCP: 9.85273198248465e-140| (7) Cortex ZG: 1.21846611112594e-145| (8) Cycling TH+: 2.53884097809543e-71| (9) Cortex X Zone: 5.31246408379192e-123| (10) E Neuroblast: 1.143076…	(1) PN NOR Chromaffin: 0.99446979867449| (2) PN ADR Chromaffin: 0.501752601439014| (3) Endothelial: 7.2314625580434| (4) Macrophage: 9.6711697694135| (5) E NOR Chromaffin: 2.65706473998724| (6) E Glia|SCP: 5.94945102812791| (7) Cortex ZG: 8.68673126794671| (8) Cycling TH+: 2.38796003723579| (9) Cortex X Zone: 6.31601778231446| (10) E Neuroblast: 1.04777140959108| (11) PN Sustentacular: 6.86399855…	(1) PN NOR Chromaffin: 0.501| (2) PN ADR Chromaffin: 0.788| (3) Endothelial: 0.035| (4) Macrophage: 0.009| (5) E NOR Chromaffin: 0.285| (6) E Glia|SCP: 0.09| (7) Cortex ZG: 0.013| (8) Cycling TH+: 0.414| (9) Cortex X Zone: 0.059| (10) E Neuroblast: 0.618| (11) PN Sustentacular: 0.058| (12) Cortex ZF: 0.009| (13) Macrophage: 0.076| (14) Cortex ZG: 0.029| (15) Dendritic cell: 0.03| (16) T cell: 0| …
Plcxd3	(0) E ADR Chromaffin	4.75926	2.97986e-10	1.14033e-05	0.636	0.114632	(1) PN NOR Chromaffin: 1.54505163896318e-60| (2) PN ADR Chromaffin: 1.73110854395318e-33| (3) Endothelial: 1.80406955427285e-126| (4) Macrophage: 1.35579938600501e-119| (5) E NOR Chromaffin: 7.91369657416511e-25| (6) E Glia|SCP: 4.75983420252285e-86| (7) Cortex ZG: 5.72615979018078e-91| (8) Cycling TH+: 2.12310159347487e-16| (9) Cortex X Zone: 4.70482356762764e-78| (10) E Neuroblast: 9.0923471864…	(1) PN NOR Chromaffin: 5.91260361198431e-56| (2) PN ADR Chromaffin: 6.62460617600004e-29| (3) Endothelial: 6.90381337029133e-122| (4) Macrophage: 5.18837309036396e-115| (5) E NOR Chromaffin: 3.0284134050015e-20| (6) E Glia|SCP: 1.82149335262144e-81| (7) Cortex ZG: 2.19128682850638e-86| (8) Cycling TH+: 8.12468517790963e-12| (9) Cortex X Zone: 1.80044188285974e-73| (10) E Neuroblast: 3.47945942131…	(1) PN NOR Chromaffin: 1.75145788978746| (2) PN ADR Chromaffin: 1.08177034747251| (3) Endothelial: 5.34732675858461| (4) Macrophage: 8.74950963991132| (5) E NOR Chromaffin: 1.09470679621038| (6) E Glia|SCP: 5.03561415410133| (7) Cortex ZG: 7.59707621281646| (8) Cycling TH+: 1.13244071127844| (9) Cortex X Zone: 6.41519590104818| (10) E Neuroblast: 1.20772749258792| (11) PN Sustentacular: 6.6508191…	(1) PN NOR Chromaffin: 0.277| (2) PN ADR Chromaffin: 0.381| (3) Endothelial: 0.005| (4) Macrophage: 0.011| (5) E NOR Chromaffin: 0.356| (6) E Glia|SCP: 0.041| (7) Cortex ZG: 0.008| (8) Cycling TH+: 0.428| (9) Cortex X Zone: 0.015| (10) E Neuroblast: 0.371| (11) PN Sustentacular: 0.013| (12) Cortex ZF: 0.009| (13) Macrophage: 0.029| (14) Cortex ZG: 0| (15) Dendritic cell: 0.01| (16) T cell: 0| (17…
Pnkd	(0) E ADR Chromaffin	2.17046	1.61185e-11	6.16821e-07	0.873	0.545684	(1) PN NOR Chromaffin: 2.05532546721876e-54| (2) PN ADR Chromaffin: 2.68914786519061e-20| (3) Endothelial: 1.38130441645894e-109| (4) Macrophage: 1.87695980453193e-156| (5) E NOR Chromaffin: 5.29578886520747e-20| (6) E Glia|SCP: 5.5952709758194e-37| (7) Cortex ZG: 9.94700200105112e-48| (8) Cycling TH+: 2.01249760574974e-20| (9) Cortex X Zone: 8.07234924809203e-56| (10) E Neuroblast: 1.20651079973…	(1) PN NOR Chromaffin: 7.86531949795277e-50| (2) PN ADR Chromaffin: 1.02908310505114e-15| (3) Endothelial: 5.28597574090506e-105| (4) Macrophage: 7.1827497799828e-152| (5) E NOR Chromaffin: 2.0265924829376e-15| (6) E Glia|SCP: 2.14119829702657e-32| (7) Cortex ZG: 3.80651872576224e-43| (8) Cycling TH+: 7.70142583768311e-16| (9) Cortex X Zone: 3.08912661025986e-51| (10) E Neuroblast: 4.617075528426…	(1) PN NOR Chromaffin: 1.5472562402511| (2) PN ADR Chromaffin: 0.690549933582612| (3) Endothelial: 2.57288233628099| (4) Macrophage: 4.27081969930984| (5) E NOR Chromaffin: 0.897307663059045| (6) E Glia|SCP: 1.20500748467139| (7) Cortex ZG: 1.9659423965571| (8) Cycling TH+: 1.0531837279897| (9) Cortex X Zone: 2.79619057861622| (10) E Neuroblast: 0.900284757007688| (11) PN Sustentacular: 1.5192536…	(1) PN NOR Chromaffin: 0.792| (2) PN ADR Chromaffin: 0.769| (3) Endothelial: 0.396| (4) Macrophage: 0.212| (5) E NOR Chromaffin: 0.766| (6) E Glia|SCP: 0.602| (7) Cortex ZG: 0.749| (8) Cycling TH+: 0.794| (9) Cortex X Zone: 0.753| (10) E Neuroblast: 0.717| (11) PN Sustentacular: 0.455| (12) Cortex ZF: 0.627| (13) Macrophage: 0.429| (14) Cortex ZG: 0.854| (15) Dendritic cell: 0.202| (16) T cell: 0…
P4ha2	(0) E ADR Chromaffin	3.01746	8.10537e-18	3.10176e-13	0.907	0.351	(1) PN NOR Chromaffin: 4.79699722768484e-47| (2) PN ADR Chromaffin: 2.74972027796611e-48| (3) Endothelial: 2.12878967008753e-129| (4) Macrophage: 1.00735028792942e-199| (5) E NOR Chromaffin: 2.3544863008418e-19| (6) E Glia|SCP: 7.56602974571184e-93| (7) Cortex ZG: 1.43703747974715e-111| (8) Cycling TH+: 2.30727028736362e-25| (9) Cortex X Zone: 1.68035710175957e-108| (10) E Neuroblast: 3.476518000…	(1) PN NOR Chromaffin: 1.83571489909043e-42| (2) PN ADR Chromaffin: 1.05226295597207e-43| (3) Endothelial: 8.14645230949095e-125| (4) Macrophage: 3.8549280818483e-195| (5) E NOR Chromaffin: 9.01014817606139e-15| (6) E Glia|SCP: 2.89536826308901e-88| (7) Cortex ZG: 5.4992550274964e-107| (8) Cycling TH+: 8.82946193568311e-21| (9) Cortex X Zone: 6.43039055701351e-104| (10) E Neuroblast: 1.3303939082…	(1) PN NOR Chromaffin: 0.93981534960395| (2) PN ADR Chromaffin: 0.936604860986593| (3) Endothelial: 2.09053253622973| (4) Macrophage: 5.73913792881224| (5) E NOR Chromaffin: 0.577276483542217| (6) E Glia|SCP: 2.22112436509782| (7) Cortex ZG: 2.80010782028636| (8) Cycling TH+: 0.817314225912773| (9) Cortex X Zone: 3.2737411012059| (10) E Neuroblast: 1.87079878232003| (11) PN Sustentacular: 2.60628…	(1) PN NOR Chromaffin: 0.783| (2) PN ADR Chromaffin: 0.754| (3) Endothelial: 0.273| (4) Macrophage: 0.048| (5) E NOR Chromaffin: 0.776| (6) E Glia|SCP: 0.383| (7) Cortex ZG: 0.301| (8) Cycling TH+: 0.733| (9) Cortex X Zone: 0.309| (10) E Neuroblast: 0.522| (11) PN Sustentacular: 0.281| (12) Cortex ZF: 0.555| (13) Macrophage: 0.152| (14) Cortex ZG: 0.35| (15) Dendritic cell: 0.061| (16) T cell: 0.…
Nefh	(0) E ADR Chromaffin	3.82701	9.0223e-10	3.45265e-05	0.589	0.109368	(1) PN NOR Chromaffin: 7.46648357650655e-33| (2) PN ADR Chromaffin: 2.14353615887803e-11| (3) Endothelial: 5.59478289970435e-105| (4) Macrophage: 5.40107859729062e-106| (5) E NOR Chromaffin: 1.02159647486814e-22| (6) E Glia|SCP: 1.99961147515183e-75| (7) Cortex ZG: 8.01491838011358e-80| (8) Cycling TH+: 6.09937478801005e-18| (9) Cortex X Zone: 1.15237155912163e-67| (10) E Neuroblast: 5.4718080190…	(1) PN NOR Chromaffin: 2.85727393505753e-28| (2) PN ADR Chromaffin: 8.20288417279446e-07| (3) Endothelial: 2.14101152005886e-100| (4) Macrophage: 2.06688475761118e-101| (5) E NOR Chromaffin: 3.90944539002541e-18| (6) E Glia|SCP: 7.65211319311102e-71| (7) Cortex ZG: 3.06714896570187e-75| (8) Cycling TH+: 2.33410874387569e-13| (9) Cortex X Zone: 4.40989548244665e-63| (10) E Neuroblast: 2.0939514927…	(1) PN NOR Chromaffin: 1.35346161105311| (2) PN ADR Chromaffin: 0.694596663888762| (3) Endothelial: 4.37578417688673| (4) Macrophage: 6.73910743002108| (5) E NOR Chromaffin: 1.08472822262968| (6) E Glia|SCP: 4.86515785008515| (7) Cortex ZG: 6.24087682102423| (8) Cycling TH+: 1.19754290474306| (9) Cortex X Zone: 5.37739530544168| (10) E Neuroblast: 1.30760986237896| (11) PN Sustentacular: 3.472339…	(1) PN NOR Chromaffin: 0.343| (2) PN ADR Chromaffin: 0.461| (3) Endothelial: 0.027| (4) Macrophage: 0.011| (5) E NOR Chromaffin: 0.321| (6) E Glia|SCP: 0.041| (7) Cortex ZG: 0.013| (8) Cycling TH+: 0.337| (9) Cortex X Zone: 0.021| (10) E Neuroblast: 0.259| (11) PN Sustentacular: 0.036| (12) Cortex ZF: 0| (13) Macrophage: 0.019| (14) Cortex ZG: 0.019| (15) Dendritic cell: 0.01| (16) T cell: 0.08| …
Abcb10	(0) E ADR Chromaffin	2.29969	7.95452e-10	3.04403e-05	0.792	0.288526	(1) PN NOR Chromaffin: 1.26401542026287e-14| (2) PN ADR Chromaffin: 3.9979110293387e-18| (3) Endothelial: 3.75269477582318e-122| (4) Macrophage: 4.05058303569834e-117| (5) E NOR Chromaffin: 2.12061945695106e-13| (6) E Glia|SCP: 1.31595949170887e-84| (7) Cortex ZG: 1.74097929965676e-100| (8) Cycling TH+: 2.58630684200718e-25| (9) Cortex X Zone: 1.92981228748083e-66| (10) E Neuroblast: 4.4548121450…	(1) PN NOR Chromaffin: 4.83713421026195e-10| (2) PN ADR Chromaffin: 1.52992059270733e-13| (3) Endothelial: 1.43608123681201e-117| (4) Macrophage: 1.55007711610104e-112| (5) E NOR Chromaffin: 8.11518653786031e-09| (6) E Glia|SCP: 5.03591378287149e-80| (7) Cortex ZG: 6.6623795839265e-96| (8) Cycling TH+: 9.8972790229931e-21| (9) Cortex X Zone: 7.38500566173165e-62| (10) E Neuroblast: 1.704767511675…	(1) PN NOR Chromaffin: 0.612455318236997| (2) PN ADR Chromaffin: 0.58830385203022| (3) Endothelial: 2.43706453328119| (4) Macrophage: 2.80108408594929| (5) E NOR Chromaffin: 0.635033336319342| (6) E Glia|SCP: 2.56552223577576| (7) Cortex ZG: 3.55040312115446| (8) Cycling TH+: 1.17451446936724| (9) Cortex X Zone: 2.56785141950362| (10) E Neuroblast: 1.11389268678256| (11) PN Sustentacular: 2.21030…	(1) PN NOR Chromaffin: 0.704| (2) PN ADR Chromaffin: 0.624| (3) Endothelial: 0.145| (4) Macrophage: 0.16| (5) E NOR Chromaffin: 0.622| (6) E Glia|SCP: 0.206| (7) Cortex ZG: 0.138| (8) Cycling TH+: 0.572| (9) Cortex X Zone: 0.276| (10) E Neuroblast: 0.502| (11) PN Sustentacular: 0.192| (12) Cortex ZF: 0.236| (13) Macrophage: 0.21| (14) Cortex ZG: 0.184| (15) Dendritic cell: 0.141| (16) T cell: 0.0…
Lix1	(1) PN NOR Chromaffin	5.48674	5.62073e-20	2.15094e-15	0.962	0.170579	(0) E ADR Chromaffin: 7.11991287455275e-286| (2) PN ADR Chromaffin: 5.20959909750724e-245| (3) Endothelial: 3.99006722941164e-220| (4) Macrophage: 9.58162570750594e-218| (5) E NOR Chromaffin: 6.89375497096967e-29| (6) E Glia|SCP: 1.2844647019164e-169| (7) Cortex ZG: 1.72708624015987e-171| (8) Cycling TH+: 2.44084442826305e-59| (9) Cortex X Zone: 5.43509525414692e-150| (10) E Neuroblast: 1.3121926…	(0) E ADR Chromaffin: 2.72464825883385e-281| (2) PN ADR Chromaffin: 1.99360938263407e-240| (3) Endothelial: 1.52691892735124e-215| (4) Macrophage: 3.66669652574837e-213| (5) E NOR Chromaffin: 2.63810215229067e-24| (6) E Glia|SCP: 4.91538952129366e-165| (7) Cortex ZG: 6.60921362384381e-167| (8) Cycling TH+: 9.34062345807703e-55| (9) Cortex X Zone: 2.07990225185694e-145| (10) E Neuroblast: 5.021498…	(0) E ADR Chromaffin: 4.29164586233364| (2) PN ADR Chromaffin: 3.77346122768568| (3) Endothelial: 5.34727015855102| (4) Macrophage: 6.83768823791142| (5) E NOR Chromaffin: 0.701644554938987| (6) E Glia|SCP: 5.49997884377844| (7) Cortex ZG: 6.94364107511924| (8) Cycling TH+: 1.3085305204943| (9) Cortex X Zone: 6.37145461242388| (10) E Neuroblast: 2.09462931667108| (11) PN Sustentacular: 6.99807228…	(0) E ADR Chromaffin: 0.24| (2) PN ADR Chromaffin: 0.269| (3) Endothelial: 0.071| (4) Macrophage: 0.043| (5) E NOR Chromaffin: 0.791| (6) E Glia|SCP: 0.09| (7) Cortex ZG: 0.038| (8) Cycling TH+: 0.666| (9) Cortex X Zone: 0.121| (10) E Neuroblast: 0.494| (11) PN Sustentacular: 0.04| (12) Cortex ZF: 0.118| (13) Macrophage: 0.152| (14) Cortex ZG: 0.019| (15) Dendritic cell: 0.02| (16) T cell: 0.011|…
Cox8b	(1) PN NOR Chromaffin	8.03082	1.9048e-13	7.28927e-09	0.792	0.0734737	(0) E ADR Chromaffin: 1.5189255923985e-259| (2) PN ADR Chromaffin: 2.12646431932811e-197| (3) Endothelial: 1.53934307823531e-159| (4) Macrophage: 2.51312691066698e-150| (5) E NOR Chromaffin: 7.24871909703638e-123| (6) E Glia|SCP: 3.13794087858253e-129| (7) Cortex ZG: 5.33706754423426e-124| (8) Cycling TH+: 1.53628557590332e-111| (9) Cortex X Zone: 2.79231439432224e-107| (10) E Neuroblast: 1.13979…	(0) E ADR Chromaffin: 5.81262445699059e-255| (2) PN ADR Chromaffin: 8.13755365720481e-193| (3) Endothelial: 5.89075809179088e-155| (4) Macrophage: 9.61723406174041e-146| (5) E NOR Chromaffin: 2.77393982405388e-118| (6) E Glia|SCP: 1.20082721541596e-124| (7) Cortex ZG: 2.04238900782757e-119| (8) Cycling TH+: 5.87905764186683e-107| (9) Cortex X Zone: 1.06856287241923e-102| (10) E Neuroblast: 4.3617…	(0) E ADR Chromaffin: 10.6359085646667| (2) PN ADR Chromaffin: 4.8448736637463| (3) Endothelial: 8.68623217641927| (4) Macrophage: 9.00399721236361| (5) E NOR Chromaffin: 5.68583010063767| (6) E Glia|SCP: 10.4906817129213| (7) Cortex ZG: 9.69115222386491| (8) Cycling TH+: 6.91676332976084| (9) Cortex X Zone: 9.04539136907461| (10) E Neuroblast: 9.77572473968884| (11) PN Sustentacular: 7.733999368…	(0) E ADR Chromaffin: 0.013| (2) PN ADR Chromaffin: 0.082| (3) Endothelial: 0.069| (4) Macrophage: 0.09| (5) E NOR Chromaffin: 0.136| (6) E Glia|SCP: 0| (7) Cortex ZG: 0.018| (8) Cycling TH+: 0.051| (9) Cortex X Zone: 0.038| (10) E Neuroblast: 0| (11) PN Sustentacular: 0.067| (12) Cortex ZF: 0.073| (13) Macrophage: 0.076| (14) Cortex ZG: 0.029| (15) Dendritic cell: 0.071| (16) T cell: 0.182| (17)…
Snap25	(1) PN NOR Chromaffin	5.37601	2.90017e-21	1.10984e-16	0.999	0.357579	(0) E ADR Chromaffin: 1.73002266659229e-253| (2) PN ADR Chromaffin: 8.48452805891117e-158| (3) Endothelial: 2.75174105079017e-239| (4) Macrophage: 6.89663025486696e-231| (5) E NOR Chromaffin: 3.13860066239934e-41| (6) E Glia|SCP: 7.19893841618114e-187| (7) Cortex ZG: 2.25434178963743e-184| (8) Cycling TH+: 3.16618977950592e-60| (9) Cortex X Zone: 1.82694396134971e-163| (10) E Neuroblast: 1.191880…	(0) E ADR Chromaffin: 6.62045074051538e-249| (2) PN ADR Chromaffin: 3.24685919758413e-153| (3) Endothelial: 1.05303626531638e-234| (4) Macrophage: 2.63920246593249e-226| (5) E NOR Chromaffin: 1.20107970148698e-36| (6) E Glia|SCP: 2.7548897531042e-182| (7) Cortex ZG: 8.62691516058451e-180| (8) Cycling TH+: 1.21163750482133e-55| (9) Cortex X Zone: 6.99134915129309e-159| (10) E Neuroblast: 4.5610865…	(0) E ADR Chromaffin: 2.28322644305959| (2) PN ADR Chromaffin: 1.37336330029949| (3) Endothelial: 6.58967027014722| (4) Macrophage: 7.47295440016592| (5) E NOR Chromaffin: 0.666281075457661| (6) E Glia|SCP: 6.5167957738091| (7) Cortex ZG: 7.89914468047132| (8) Cycling TH+: 0.990032637416893| (9) Cortex X Zone: 7.74339493099554| (10) E Neuroblast: 0.636032332760782| (11) PN Sustentacular: 7.148078…	(0) E ADR Chromaffin: 0.945| (2) PN ADR Chromaffin: 0.98| (3) Endothelial: 0.131| (4) Macrophage: 0.153| (5) E NOR Chromaffin: 0.992| (6) E Glia|SCP: 0.138| (7) Cortex ZG: 0.05| (8) Cycling TH+: 0.947| (9) Cortex X Zone: 0.118| (10) E Neuroblast: 0.964| (11) PN Sustentacular: 0.196| (12) Cortex ZF: 0.082| (13) Macrophage: 0.133| (14) Cortex ZG: 0.155| (15) Dendritic cell: 0.131| (16) T cell: 0.14…
Epha5	(1) PN NOR Chromaffin	5.39531	1.30534e-17	4.99529e-13	0.896	0.134053	(0) E ADR Chromaffin: 2.83970806389838e-241| (2) PN ADR Chromaffin: 6.0651195996806e-158| (3) Endothelial: 6.81193461475568e-198| (4) Macrophage: 1.31049918199719e-195| (5) E NOR Chromaffin: 7.17241779135296e-22| (6) E Glia|SCP: 1.57858978566822e-135| (7) Cortex ZG: 1.20457679932933e-152| (8) Cycling TH+: 6.51737172703706e-74| (9) Cortex X Zone: 8.01620200972525e-127| (10) E Neuroblast: 5.2291148…	(0) E ADR Chromaffin: 1.08669948189263e-236| (2) PN ADR Chromaffin: 2.32099996840577e-153| (3) Endothelial: 2.6067911383747e-193| (4) Macrophage: 5.01501826966684e-191| (5) E NOR Chromaffin: 2.74474084039495e-17| (6) E Glia|SCP: 6.04094739179513e-131| (7) Cortex ZG: 4.60967449567348e-148| (8) Cycling TH+: 2.49406781250254e-69| (9) Cortex X Zone: 3.06764018508166e-122| (10) E Neuroblast: 2.0010776…	(0) E ADR Chromaffin: 4.21451387288985| (2) PN ADR Chromaffin: 2.66908246584307| (3) Endothelial: 6.75901583147593| (4) Macrophage: 8.66094980626286| (5) E NOR Chromaffin: 0.652612100609275| (6) E Glia|SCP: 4.43450132983189| (7) Cortex ZG: 8.11139467495048| (8) Cycling TH+: 2.21621153398153| (9) Cortex X Zone: 6.39936128817232| (10) E Neuroblast: 2.03696727075359| (11) PN Sustentacular: 5.0913592…	(0) E ADR Chromaffin: 0.155| (2) PN ADR Chromaffin: 0.305| (3) Endothelial: 0.056| (4) Macrophage: 0.02| (5) E NOR Chromaffin: 0.636| (6) E Glia|SCP: 0.112| (7) Cortex ZG: 0.01| (8) Cycling TH+: 0.385| (9) Cortex X Zone: 0.115| (10) E Neuroblast: 0.287| (11) PN Sustentacular: 0.112| (12) Cortex ZF: 0.082| (13) Macrophage: 0.057| (14) Cortex ZG: 0.049| (15) Dendritic cell: 0.051| (16) T cell: 0.02…
Slc10a4	(1) PN NOR Chromaffin	6.1668	1.10318e-20	4.22166e-16	0.984	0.264053	(0) E ADR Chromaffin: 4.41483957027123e-231| (2) PN ADR Chromaffin: 1.76473511024882e-209| (3) Endothelial: 6.55325335468028e-235| (4) Macrophage: 7.31636156861305e-227| (5) E NOR Chromaffin: 1.12334534718541e-50| (6) E Glia|SCP: 1.53456097764969e-178| (7) Cortex ZG: 2.4590008375229e-179| (8) Cycling TH+: 4.77983214180398e-70| (9) Cortex X Zone: 1.86382310873956e-158| (10) E Neuroblast: 1.3143377…	(0) E ADR Chromaffin: 1.68947080675139e-226| (2) PN ADR Chromaffin: 6.7532883199002e-205| (3) Endothelial: 2.50779899376905e-230| (4) Macrophage: 2.79982524507684e-222| (5) E NOR Chromaffin: 4.29881797460913e-46| (6) E Glia|SCP: 5.87245794926982e-174| (7) Cortex ZG: 9.41010440503264e-175| (8) Cycling TH+: 1.82914616402555e-65| (9) Cortex X Zone: 7.13247827252456e-154| (10) E Neuroblast: 5.0297076…	(0) E ADR Chromaffin: 2.67997285072371| (2) PN ADR Chromaffin: 2.65278634459985| (3) Endothelial: 7.06974498899242| (4) Macrophage: 8.67719438018963| (5) E NOR Chromaffin: 0.892888013554701| (6) E Glia|SCP: 6.04849736914534| (7) Cortex ZG: 7.88172155203562| (8) Cycling TH+: 1.43172455792056| (9) Cortex X Zone: 8.39280956629066| (10) E Neuroblast: 1.24575905081038| (11) PN Sustentacular: 8.1318619…	(0) E ADR Chromaffin: 0.598| (2) PN ADR Chromaffin: 0.604| (3) Endothelial: 0.082| (4) Macrophage: 0.086| (5) E NOR Chromaffin: 0.835| (6) E Glia|SCP: 0.083| (7) Cortex ZG: 0.048| (8) Cycling TH+: 0.789| (9) Cortex X Zone: 0.121| (10) E Neuroblast: 0.797| (11) PN Sustentacular: 0.116| (12) Cortex ZF: 0.109| (13) Macrophage: 0.105| (14) Cortex ZG: 0.097| (15) Dendritic cell: 0.172| (16) T cell: 0.…
Pcdh15	(1) PN NOR Chromaffin	5.44059	1.66952e-19	6.3889e-15	0.954	0.195632	(0) E ADR Chromaffin: 8.84853481052719e-231| (2) PN ADR Chromaffin: 1.16860883239283e-124| (3) Endothelial: 8.30500144424685e-216| (4) Macrophage: 3.72328608081258e-213| (5) E NOR Chromaffin: 2.90919141526227e-31| (6) E Glia|SCP: 6.47819179106453e-144| (7) Cortex ZG: 2.16383819700686e-169| (8) Cycling TH+: 2.30059070098334e-85| (9) Cortex X Zone: 1.50032212480375e-147| (10) E Neuroblast: 1.326041…	(0) E ADR Chromaffin: 3.38615730129255e-226| (2) PN ADR Chromaffin: 4.47203227980088e-120| (3) Endothelial: 3.17815795268438e-211| (4) Macrophage: 1.42482711740536e-208| (5) E NOR Chromaffin: 1.11328937079257e-26| (6) E Glia|SCP: 2.47907443460458e-139| (7) Cortex ZG: 8.28057601230585e-165| (8) Cycling TH+: 8.80390049452306e-81| (9) Cortex X Zone: 5.74143270719898e-143| (10) E Neuroblast: 5.074494…	(0) E ADR Chromaffin: 3.41505544155206| (2) PN ADR Chromaffin: 1.90688435166812| (3) Endothelial: 5.87896847472771| (4) Macrophage: 7.7077462608003| (5) E NOR Chromaffin: 0.850592161964163| (6) E Glia|SCP: 3.72196150592724| (7) Cortex ZG: 8.12768163967519| (8) Cycling TH+: 2.11407927092326| (9) Cortex X Zone: 7.23473149777775| (10) E Neuroblast: 5.1014346496467| (11) PN Sustentacular: 6.604847961…	(0) E ADR Chromaffin: 0.343| (2) PN ADR Chromaffin: 0.571| (3) Endothelial: 0.096| (4) Macrophage: 0.072| (5) E NOR Chromaffin: 0.764| (6) E Glia|SCP: 0.182| (7) Cortex ZG: 0.04| (8) Cycling TH+: 0.487| (9) Cortex X Zone: 0.097| (10) E Neuroblast: 0.163| (11) PN Sustentacular: 0.121| (12) Cortex ZF: 0.055| (13) Macrophage: 0.171| (14) Cortex ZG: 0.097| (15) Dendritic cell: 0.091| (16) T cell: 0.0…
Myl1	(1) PN NOR Chromaffin	6.06801	1.40789e-13	5.38771e-09	0.767	0.067	(0) E ADR Chromaffin: 8.77588905057631e-205| (2) PN ADR Chromaffin: 1.002572882868e-196| (3) Endothelial: 2.45065424561608e-157| (4) Macrophage: 2.0381473491621e-153| (5) E NOR Chromaffin: 4.65581064738818e-29| (6) E Glia|SCP: 3.93350287682561e-118| (7) Cortex ZG: 1.55930662806405e-117| (8) Cycling TH+: 3.74909677153483e-67| (9) Cortex X Zone: 4.20523245815459e-102| (10) E Neuroblast: 9.112093670…	(0) E ADR Chromaffin: 3.35835722187454e-200| (2) PN ADR Chromaffin: 3.83664590815928e-192| (3) Endothelial: 9.37816366712362e-153| (4) Macrophage: 7.79958227577352e-149| (5) E NOR Chromaffin: 1.78168561854251e-24| (6) E Glia|SCP: 1.50527288090363e-113| (7) Cortex ZG: 5.9671546042755e-113| (8) Cycling TH+: 1.43470435253095e-62| (9) Cortex X Zone: 1.6092583570866e-97| (10) E Neuroblast: 3.487016005…	(0) E ADR Chromaffin: 5.34751332795911| (2) PN ADR Chromaffin: 4.53596961481579| (3) Endothelial: 7.1609007278327| (4) Macrophage: 8.38741851656809| (5) E NOR Chromaffin: 1.37266007553044| (6) E Glia|SCP: 6.19342528488848| (7) Cortex ZG: 7.73520292191623| (8) Cycling TH+: 2.73065297220851| (9) Cortex X Zone: 7.69843081194873| (10) E Neuroblast: 3.31769651181588| (11) PN Sustentacular: 6.733963496…	(0) E ADR Chromaffin: 0.106| (2) PN ADR Chromaffin: 0.046| (3) Endothelial: 0.025| (4) Macrophage: 0.011| (5) E NOR Chromaffin: 0.52| (6) E Glia|SCP: 0.015| (7) Cortex ZG: 0.013| (8) Cycling TH+: 0.241| (9) Cortex X Zone: 0.029| (10) E Neuroblast: 0.112| (11) PN Sustentacular: 0.022| (12) Cortex ZF: 0.018| (13) Macrophage: 0.019| (14) Cortex ZG: 0.019| (15) Dendritic cell: 0.03| (16) T cell: 0| (…
Necab1	(1) PN NOR Chromaffin	5.20013	1.88486e-13	7.213e-09	0.75	0.0983158	(0) E ADR Chromaffin: 1.85400713876286e-203| (2) PN ADR Chromaffin: 4.75302424584828e-36| (3) Endothelial: 3.66659976556452e-153| (4) Macrophage: 2.45465518754974e-144| (5) E NOR Chromaffin: 1.60066413025855e-48| (6) E Glia|SCP: 1.24627729564615e-112| (7) Cortex ZG: 5.45773816881977e-115| (8) Cycling TH+: 1.50703083763138e-29| (9) Cortex X Zone: 2.84546531613872e-98| (10) E Neuroblast: 2.59203477…	(0) E ADR Chromaffin: 7.09491451861771e-199| (2) PN ADR Chromaffin: 1.81888731840122e-31| (3) Endothelial: 1.40313439828623e-148| (4) Macrophage: 9.39347447171534e-140| (5) E NOR Chromaffin: 6.12542149367341e-44| (6) E Glia|SCP: 4.76925395497868e-108| (7) Cortex ZG: 2.08856724244395e-110| (8) Cycling TH+: 5.76710560944776e-25| (9) Cortex X Zone: 1.08890266717997e-93| (10) E Neuroblast: 9.91919865…	(0) E ADR Chromaffin: 4.76688989746661| (2) PN ADR Chromaffin: 1.04046927215098| (3) Endothelial: 6.64006052632361| (4) Macrophage: 6.48729130129734| (5) E NOR Chromaffin: 1.56362813644929| (6) E Glia|SCP: 6.19016001520422| (7) Cortex ZG: 8.62539777742743| (8) Cycling TH+: 1.3306107796814| (9) Cortex X Zone: 6.94473281571168| (10) E Neuroblast: 2.50226938722991| (11) PN Sustentacular: 6.400628801…	(0) E ADR Chromaffin: 0.077| (2) PN ADR Chromaffin: 0.498| (3) Endothelial: 0.019| (4) Macrophage: 0.025| (5) E NOR Chromaffin: 0.358| (6) E Glia|SCP: 0.032| (7) Cortex ZG: 0.005| (8) Cycling TH+: 0.422| (9) Cortex X Zone: 0.026| (10) E Neuroblast: 0.171| (11) PN Sustentacular: 0.027| (12) Cortex ZF: 0.018| (13) Macrophage: 0.019| (14) Cortex ZG: 0.049| (15) Dendritic cell: 0.01| (16) T cell: 0.0…
Synpr	(1) PN NOR Chromaffin	5.20187	1.21518e-13	4.65025e-09	0.819	0.115105	(0) E ADR Chromaffin: 1.93352595137186e-203| (2) PN ADR Chromaffin: 2.12415807985825e-37| (3) Endothelial: 4.90771404980708e-166| (4) Macrophage: 5.92357886523204e-162| (5) E NOR Chromaffin: 4.01649871822943e-118| (6) E Glia|SCP: 4.41483994047067e-131| (7) Cortex ZG: 2.96381193561519e-130| (8) Cycling TH+: 7.65734320440866e-90| (9) Cortex X Zone: 1.18224480071954e-113| (10) E Neuroblast: 1.875172…	(0) E ADR Chromaffin: 7.39921711070983e-199| (2) PN ADR Chromaffin: 8.12872814000155e-33| (3) Endothelial: 1.87808401258017e-161| (4) Macrophage: 2.266835160147e-157| (5) E NOR Chromaffin: 1.53703372949204e-113| (6) E Glia|SCP: 1.68947094841932e-126| (7) Cortex ZG: 1.13419155152122e-125| (8) Cycling TH+: 2.93031209746311e-85| (9) Cortex X Zone: 4.52421440339352e-109| (10) E Neuroblast: 7.17591046…	(0) E ADR Chromaffin: 3.89148723564223| (2) PN ADR Chromaffin: 0.822576293811589| (3) Endothelial: 5.0654541939363| (4) Macrophage: 6.15970208410064| (5) E NOR Chromaffin: 3.61656181874806| (6) E Glia|SCP: 6.61821418312645| (7) Cortex ZG: 6.97042390547166| (8) Cycling TH+: 3.28248066755483| (9) Cortex X Zone: 8.0453530438709| (10) E Neuroblast: 4.58886891526162| (11) PN Sustentacular: 5.703054105…	(0) E ADR Chromaffin: 0.159| (2) PN ADR Chromaffin: 0.609| (3) Endothelial: 0.049| (4) Macrophage: 0.048| (5) E NOR Chromaffin: 0.181| (6) E Glia|SCP: 0.034| (7) Cortex ZG: 0.015| (8) Cycling TH+: 0.235| (9) Cortex X Zone: 0.041| (10) E Neuroblast: 0.064| (11) PN Sustentacular: 0.08| (12) Cortex ZF: 0.064| (13) Macrophage: 0.067| (14) Cortex ZG: 0.058| (15) Dendritic cell: 0.061| (16) T cell: 0.0…
Kcnn3	(1) PN NOR Chromaffin	5.00247	1.01369e-15	3.87919e-11	0.838	0.0942632	(0) E ADR Chromaffin: 2.79893555469024e-192| (2) PN ADR Chromaffin: 3.85456472366604e-168| (3) Endothelial: 2.98873007143035e-155| (4) Macrophage: 2.49159897062511e-173| (5) E NOR Chromaffin: 3.09130148025131e-68| (6) E Glia|SCP: 3.76222718279606e-120| (7) Cortex ZG: 7.16957147579892e-136| (8) Cycling TH+: 5.77399921678755e-87| (9) Cortex X Zone: 1.06323312688467e-118| (10) E Neuroblast: 1.555645…	(0) E ADR Chromaffin: 1.07109665806886e-187| (2) PN ADR Chromaffin: 1.47506482845252e-163| (3) Endothelial: 1.14372722373496e-150| (4) Macrophage: 9.53485094078817e-169| (5) E NOR Chromaffin: 1.18297925046257e-63| (6) E Glia|SCP: 1.4397290983124e-115| (7) Cortex ZG: 2.74365161235873e-131| (8) Cycling TH+: 2.20959402028026e-82| (9) Cortex X Zone: 4.06878052996227e-114| (10) E Neuroblast: 5.9531442…	(0) E ADR Chromaffin: 3.4729180217618| (2) PN ADR Chromaffin: 3.20858564915149| (3) Endothelial: 3.64008092521965| (4) Macrophage: 7.07466704776361| (5) E NOR Chromaffin: 2.00496628503771| (6) E Glia|SCP: 4.16459888326417| (7) Cortex ZG: 7.66515813566878| (8) Cycling TH+: 2.83976357624054| (9) Cortex X Zone: 7.02119025124261| (10) E Neuroblast: 4.50561535817658| (11) PN Sustentacular: 4.150567812…	(0) E ADR Chromaffin: 0.189| (2) PN ADR Chromaffin: 0.188| (3) Endothelial: 0.091| (4) Macrophage: 0.027| (5) E NOR Chromaffin: 0.388| (6) E Glia|SCP: 0.09| (7) Cortex ZG: 0.015| (8) Cycling TH+: 0.219| (9) Cortex X Zone: 0.024| (10) E Neuroblast: 0.116| (11) PN Sustentacular: 0.089| (12) Cortex ZF: 0.055| (13) Macrophage: 0.057| (14) Cortex ZG: 0.01| (15) Dendritic cell: 0.081| (16) T cell: 0.03…
Chrm1	(1) PN NOR Chromaffin	4.9241	1.30279e-08	0.000498553	0.651	0.0555789	(0) E ADR Chromaffin: 4.01147108749487e-185| (2) PN ADR Chromaffin: 1.93288809031162e-134| (3) Endothelial: 5.72751901943896e-123| (4) Macrophage: 1.53197574227498e-116| (5) E NOR Chromaffin: 1.51355429098106e-57| (6) E Glia|SCP: 4.12146159111737e-58| (7) Cortex ZG: 1.08647297573114e-92| (8) Cycling TH+: 3.2355673563695e-67| (9) Cortex X Zone: 1.02379534293088e-76| (10) E Neuroblast: 8.4561473890…	(0) E ADR Chromaffin: 1.53510975576254e-180| (2) PN ADR Chromaffin: 7.3967761440045e-130| (3) Endothelial: 2.1918069783589e-118| (4) Macrophage: 5.86256477053789e-112| (5) E NOR Chromaffin: 5.79206956072634e-53| (6) E Glia|SCP: 1.57720092168879e-53| (7) Cortex ZG: 4.15771478352793e-88| (8) Cycling TH+: 1.23818691593548e-62| (9) Cortex X Zone: 3.91786001832789e-72| (10) E Neuroblast: 3.23599848282…	(0) E ADR Chromaffin: 5.58465788153976| (2) PN ADR Chromaffin: 3.83294709950407| (3) Endothelial: 5.31656452993339| (4) Macrophage: 5.97400609810389| (5) E NOR Chromaffin: 2.19664645856605| (6) E Glia|SCP: 2.5254045278113| (7) Cortex ZG: 8.09314894740584| (8) Cycling TH+: 3.46257063161565| (9) Cortex X Zone: 5.54329414949123| (10) E Neuroblast: 3.07825790012533| (11) PN Sustentacular: 4.068149893…	(0) E ADR Chromaffin: 0.028| (2) PN ADR Chromaffin: 0.08| (3) Endothelial: 0.015| (4) Macrophage: 0.022| (5) E NOR Chromaffin: 0.193| (6) E Glia|SCP: 0.163| (7) Cortex ZG: 0.003| (8) Cycling TH+: 0.099| (9) Cortex X Zone: 0.026| (10) E Neuroblast: 0.112| (11) PN Sustentacular: 0.054| (12) Cortex ZF: 0.009| (13) Macrophage: 0.038| (14) Cortex ZG: 0| (15) Dendritic cell: 0.02| (16) T cell: 0.011| (…
Syn2	(1) PN NOR Chromaffin	6.13773	1.29505e-20	4.9559e-16	0.982	0.295053	(0) E ADR Chromaffin: 3.431669523617e-179| (2) PN ADR Chromaffin: 9.37674661580478e-147| (3) Endothelial: 1.61331873520355e-223| (4) Macrophage: 1.86217878921626e-227| (5) E NOR Chromaffin: 1.01038547545022e-45| (6) E Glia|SCP: 3.06966365482086e-179| (7) Cortex ZG: 1.21264299350758e-179| (8) Cycling TH+: 3.22501073626718e-81| (9) Cortex X Zone: 2.41627723857728e-158| (10) E Neuroblast: 8.68615992…	(0) E ADR Chromaffin: 1.31323129329775e-174| (2) PN ADR Chromaffin: 3.58829339493617e-142| (3) Endothelial: 6.17384813587696e-219| (4) Macrophage: 7.1261857905728e-223| (5) E NOR Chromaffin: 3.86654313745289e-41| (6) E Glia|SCP: 1.17469888742684e-174| (7) Cortex ZG: 4.6405422075548e-175| (8) Cycling TH+: 1.23414710855473e-76| (9) Cortex X Zone: 9.24660973658754e-154| (10) E Neuroblast: 3.32401968…	(0) E ADR Chromaffin: 2.01049209017162| (2) PN ADR Chromaffin: 1.78075644365579| (3) Endothelial: 5.35693964390917| (4) Macrophage: 9.69410505609899| (5) E NOR Chromaffin: 0.890159100846768| (6) E Glia|SCP: 6.49104217251762| (7) Cortex ZG: 9.34372850632157| (8) Cycling TH+: 1.66028063377547| (9) Cortex X Zone: 8.20234887148847| (10) E Neuroblast: 0.716315122597392| (11) PN Sustentacular: 6.206139…	(0) E ADR Chromaffin: 0.858| (2) PN ADR Chromaffin: 0.853| (3) Endothelial: 0.157| (4) Macrophage: 0.057| (5) E NOR Chromaffin: 0.915| (6) E Glia|SCP: 0.102| (7) Cortex ZG: 0.023| (8) Cycling TH+: 0.872| (9) Cortex X Zone: 0.059| (10) E Neuroblast: 0.96| (11) PN Sustentacular: 0.174| (12) Cortex ZF: 0.082| (13) Macrophage: 0.133| (14) Cortex ZG: 0.078| (15) Dendritic cell: 0.061| (16) T cell: 0.1…
Hspa2	(1) PN NOR Chromaffin	3.63732	1.92196e-19	7.35496e-15	0.951	0.315105	(0) E ADR Chromaffin: 1.58329614813745e-178| (2) PN ADR Chromaffin: 1.38722304833934e-52| (3) Endothelial: 4.725216514689e-160| (4) Macrophage: 1.09242925896979e-201| (5) E NOR Chromaffin: 2.54169790109998e-101| (6) E Glia|SCP: 4.22964465715275e-162| (7) Cortex ZG: 9.18636585710834e-148| (8) Cycling TH+: 4.79532772383147e-87| (9) Cortex X Zone: 2.64989114900402e-123| (10) E Neuroblast: 1.01200482…	(0) E ADR Chromaffin: 6.0589576996924e-174| (2) PN ADR Chromaffin: 5.308625161385e-48| (3) Endothelial: 1.80824585584118e-155| (4) Macrophage: 4.18050828822559e-197| (5) E NOR Chromaffin: 9.72656952792939e-97| (6) E Glia|SCP: 1.61860041739921e-157| (7) Cortex ZG: 3.51543848619822e-143| (8) Cycling TH+: 1.83507601335583e-82| (9) Cortex X Zone: 1.01406034490086e-118| (10) E Neuroblast: 3.8727400666…	(0) E ADR Chromaffin: 2.28166386481252| (2) PN ADR Chromaffin: 0.896289421672753| (3) Endothelial: 2.87523667532251| (4) Macrophage: 5.32972451167853| (5) E NOR Chromaffin: 1.95395214292324| (6) E Glia|SCP: 4.97224683299422| (7) Cortex ZG: 4.16996530186871| (8) Cycling TH+: 2.03004709888315| (9) Cortex X Zone: 3.52137343050771| (10) E Neuroblast: 3.08370179570635| (11) PN Sustentacular: 2.5369830…	(0) E ADR Chromaffin: 0.57| (2) PN ADR Chromaffin: 0.838| (3) Endothelial: 0.271| (4) Macrophage: 0.117| (5) E NOR Chromaffin: 0.589| (6) E Glia|SCP: 0.109| (7) Cortex ZG: 0.243| (8) Cycling TH+: 0.599| (9) Cortex X Zone: 0.335| (10) E Neuroblast: 0.367| (11) PN Sustentacular: 0.357| (12) Cortex ZF: 0.173| (13) Macrophage: 0.21| (14) Cortex ZG: 0.534| (15) Dendritic cell: 0.111| (16) T cell: 0.13…
Lgi1	(1) PN NOR Chromaffin	4.96806	1.22837e-12	4.70073e-08	0.718	0.0666842	(0) E ADR Chromaffin: 8.09453457450747e-174| (2) PN ADR Chromaffin: 1.39429105386627e-63| (3) Endothelial: 1.9372132130458e-140| (4) Macrophage: 6.89892576157366e-139| (5) E NOR Chromaffin: 3.78526680626988e-92| (6) E Glia|SCP: 7.28138587965384e-96| (7) Cortex ZG: 1.06998850708965e-106| (8) Cycling TH+: 1.96575209288447e-66| (9) Cortex X Zone: 9.72650378771063e-92| (10) E Neuroblast: 5.4625637328…	(0) E ADR Chromaffin: 3.09761649097252e-169| (2) PN ADR Chromaffin: 5.33567300493545e-59| (3) Endothelial: 7.41332752368365e-136| (4) Macrophage: 2.64008091043901e-134| (5) E NOR Chromaffin: 1.44854590142336e-87| (6) E Glia|SCP: 2.78644074842593e-91| (7) Cortex ZG: 4.09463201893068e-102| (8) Cycling TH+: 7.52254010905027e-62| (9) Cortex X Zone: 3.7221384694811e-87| (10) E Neuroblast: 2.0904138892…	(0) E ADR Chromaffin: 4.34932365016911| (2) PN ADR Chromaffin: 1.80584659390206| (3) Endothelial: 5.02590712550282| (4) Macrophage: 7.36085696867167| (5) E NOR Chromaffin: 3.43057882310823| (6) E Glia|SCP: 4.42623788462511| (7) Cortex ZG: 8.07560237277339| (8) Cycling TH+: 2.93548001877457| (9) Cortex X Zone: 6.74536972763107| (10) E Neuroblast: 3.77040329458037| (11) PN Sustentacular: 1.54653440…	(0) E ADR Chromaffin: 0.103| (2) PN ADR Chromaffin: 0.335| (3) Endothelial: 0.019| (4) Macrophage: 0.007| (5) E NOR Chromaffin: 0.132| (6) E Glia|SCP: 0.058| (7) Cortex ZG: 0.01| (8) Cycling TH+: 0.168| (9) Cortex X Zone: 0.021| (10) E Neuroblast: 0.096| (11) PN Sustentacular: 0.183| (12) Cortex ZF: 0| (13) Macrophage: 0.038| (14) Cortex ZG: 0.019| (15) Dendritic cell: 0.02| (16) T cell: 0| (17) …
RP23-48J18.2	(1) PN NOR Chromaffin	5.82806	4.45365e-12	1.70432e-07	0.707	0.0702105	(0) E ADR Chromaffin: 7.80071695031561e-173| (2) PN ADR Chromaffin: 1.6366997162374e-54| (3) Endothelial: 4.96496760188558e-135| (4) Macrophage: 1.58072855840806e-133| (5) E NOR Chromaffin: 6.71245883169402e-34| (6) E Glia|SCP: 1.33570443679532e-106| (7) Cortex ZG: 1.16039698849254e-104| (8) Cycling TH+: 1.39467634576053e-59| (9) Cortex X Zone: 1.55851429836805e-90| (10) E Neuroblast: 1.188675901…	(0) E ADR Chromaffin: 2.98517836254678e-168| (2) PN ADR Chromaffin: 6.2633224740973e-50| (3) Endothelial: 1.89999380188958e-130| (4) Macrophage: 6.04913204731597e-129| (5) E NOR Chromaffin: 2.56872374571267e-29| (6) E Glia|SCP: 5.11147373872835e-102| (7) Cortex ZG: 4.44060719556326e-100| (8) Cycling TH+: 5.33714743995641e-55| (9) Cortex X Zone: 5.96412251699487e-86| (10) E Neuroblast: 4.548824938…	(0) E ADR Chromaffin: 4.16444809632693| (2) PN ADR Chromaffin: 1.35815563547272| (3) Endothelial: 5.0079598281086| (4) Macrophage: 7.05699508011216| (5) E NOR Chromaffin: 1.39437150045196| (6) E Glia|SCP: 8.76481689484957| (7) Cortex ZG: 8.00343089537706| (8) Cycling TH+: 2.64632436836566| (9) Cortex X Zone: 7.55873481544368| (10) E Neuroblast: 8.47722837145361| (11) PN Sustentacular: 6.351630974…	(0) E ADR Chromaffin: 0.094| (2) PN ADR Chromaffin: 0.364| (3) Endothelial: 0.03| (4) Macrophage: 0.02| (5) E NOR Chromaffin: 0.358| (6) E Glia|SCP: 0.012| (7) Cortex ZG: 0.003| (8) Cycling TH+: 0.19| (9) Cortex X Zone: 0.015| (10) E Neuroblast: 0.004| (11) PN Sustentacular: 0.022| (12) Cortex ZF: 0.018| (13) Macrophage: 0.01| (14) Cortex ZG: 0.049| (15) Dendritic cell: 0.03| (16) T cell: 0.023| …
Chrna7	(1) PN NOR Chromaffin	5.72344	1.07355e-19	4.10827e-15	0.954	0.201789	(0) E ADR Chromaffin: 4.24133776922574e-167| (2) PN ADR Chromaffin: 1.3041518844743e-114| (3) Endothelial: 4.06791695287667e-227| (4) Macrophage: 9.48571025147815e-218| (5) E NOR Chromaffin: 2.92032853058691e-69| (6) E Glia|SCP: 2.03056177803035e-171| (7) Cortex ZG: 3.26723944801233e-170| (8) Cycling TH+: 1.55739320006335e-90| (9) Cortex X Zone: 4.11687388483747e-151| (10) E Neuroblast: 1.8774683…	(0) E ADR Chromaffin: 1.62307513752731e-162| (2) PN ADR Chromaffin: 4.99072843150627e-110| (3) Endothelial: 1.55671045952684e-222| (4) Macrophage: 3.62999159903566e-213| (5) E NOR Chromaffin: 1.117551322085e-64| (6) E Glia|SCP: 7.77055381216655e-167| (7) Cortex ZG: 1.25030719196536e-165| (8) Cycling TH+: 5.95983229800245e-86| (9) Cortex X Zone: 1.5754452982496e-146| (10) E Neuroblast: 7.184695950…	(0) E ADR Chromaffin: 2.35311873422335| (2) PN ADR Chromaffin: 1.7781873737616| (3) Endothelial: 8.10516211814124| (4) Macrophage: 7.98459931000466| (5) E NOR Chromaffin: 1.52782830008056| (6) E Glia|SCP: 6.57779812232001| (7) Cortex ZG: 8.12596365632986| (8) Cycling TH+: 2.25584867083326| (9) Cortex X Zone: 8.77740200374431| (10) E Neuroblast: 2.58695694411061| (11) PN Sustentacular: 7.011535690…	(0) E ADR Chromaffin: 0.667| (2) PN ADR Chromaffin: 0.746| (3) Endothelial: 0.029| (4) Macrophage: 0.013| (5) E NOR Chromaffin: 0.778| (6) E Glia|SCP: 0.032| (7) Cortex ZG: 0.02| (8) Cycling TH+: 0.626| (9) Cortex X Zone: 0.026| (10) E Neuroblast: 0.55| (11) PN Sustentacular: 0.031| (12) Cortex ZF: 0.109| (13) Macrophage: 0.019| (14) Cortex ZG: 0.039| (15) Dendritic cell: 0.02| (16) T cell: 0.045…
Lgr5	(1) PN NOR Chromaffin	6.31971	8.82559e-21	3.37738e-16	0.989	0.288684	(0) E ADR Chromaffin: 6.74695095255757e-156| (2) PN ADR Chromaffin: 2.51659573569818e-33| (3) Endothelial: 2.65483513982756e-236| (4) Macrophage: 6.38648087466616e-229| (5) E NOR Chromaffin: 7.32575140270272e-101| (6) E Glia|SCP: 1.12546807185565e-183| (7) Cortex ZG: 5.20714021654097e-181| (8) Cycling TH+: 1.22301887149666e-98| (9) Cortex X Zone: 1.0190885120147e-159| (10) E Neuroblast: 1.3467063…	(0) E ADR Chromaffin: 2.58192319052473e-151| (2) PN ADR Chromaffin: 9.63050856136981e-29| (3) Endothelial: 1.01595231130921e-231| (4) Macrophage: 2.44397850111724e-224| (5) E NOR Chromaffin: 2.80341854678628e-96| (6) E Glia|SCP: 4.3069412173772e-179| (7) Cortex ZG: 1.9926684180659e-176| (8) Cycling TH+: 4.6802486174434e-94| (9) Cortex X Zone: 3.89984791777784e-155| (10) E Neuroblast: 5.1535757307…	(0) E ADR Chromaffin: 1.61669259446226| (2) PN ADR Chromaffin: 0.569647246154474| (3) Endothelial: 7.22729242602958| (4) Macrophage: 9.27694613085773| (5) E NOR Chromaffin: 1.6174387913799| (6) E Glia|SCP: 7.71579407979476| (7) Cortex ZG: 8.42252126726258| (8) Cycling TH+: 1.85556450396962| (9) Cortex X Zone: 8.80394237017621| (10) E Neuroblast: 3.25995025283025| (11) PN Sustentacular: 7.23954675…	(0) E ADR Chromaffin: 0.925| (2) PN ADR Chromaffin: 0.956| (3) Endothelial: 0.104| (4) Macrophage: 0.088| (5) E NOR Chromaffin: 0.778| (6) E Glia|SCP: 0.102| (7) Cortex ZG: 0.05| (8) Cycling TH+: 0.893| (9) Cortex X Zone: 0.132| (10) E Neuroblast: 0.534| (11) PN Sustentacular: 0.156| (12) Cortex ZF: 0.073| (13) Macrophage: 0.133| (14) Cortex ZG: 0.107| (15) Dendritic cell: 0.131| (16) T cell: 0.1…
Lrrtm4	(1) PN NOR Chromaffin	4.50602	9.3378e-11	3.57339e-06	0.637	0.0468947	(0) E ADR Chromaffin: 9.75166300230523e-154| (2) PN ADR Chromaffin: 3.55605352659272e-116| (3) Endothelial: 3.92767006019826e-120| (4) Macrophage: 2.45852686982708e-116| (5) E NOR Chromaffin: 1.6423183890391e-30| (6) E Glia|SCP: 1.98211359313687e-82| (7) Cortex ZG: 1.28646635202771e-89| (8) Cycling TH+: 7.65548997063779e-60| (9) Cortex X Zone: 1.0535740397848e-71| (10) E Neuroblast: 8.10976752151…	(0) E ADR Chromaffin: 3.73176639772216e-149| (2) PN ADR Chromaffin: 1.3608305635565e-111| (3) Endothelial: 1.50304077863667e-115| (4) Macrophage: 9.40829062545426e-112| (5) E NOR Chromaffin: 6.28482401117483e-26| (6) E Glia|SCP: 7.58515229821616e-78| (7) Cortex ZG: 4.92304943593963e-85| (8) Cycling TH+: 2.92960290196367e-55| (9) Cortex X Zone: 4.03181713544847e-67| (10) E Neuroblast: 3.1034458351…	(0) E ADR Chromaffin: 4.37631541122459| (2) PN ADR Chromaffin: 2.77048410100223| (3) Endothelial: 5.59423379942819| (4) Macrophage: 7.49115590406849| (5) E NOR Chromaffin: 1.66140549810571| (6) E Glia|SCP: 4.5245229649352| (7) Cortex ZG: 7.40875231830481| (8) Cycling TH+: 3.17673691397645| (9) Cortex X Zone: 5.07428471839427| (10) E Neuroblast: 5.70774967054155| (11) PN Sustentacular: 2.918280643…	(0) E ADR Chromaffin: 0.071| (2) PN ADR Chromaffin: 0.095| (3) Endothelial: 0.012| (4) Macrophage: 0.011| (5) E NOR Chromaffin: 0.321| (6) E Glia|SCP: 0.041| (7) Cortex ZG: 0.005| (8) Cycling TH+: 0.12| (9) Cortex X Zone: 0.038| (10) E Neuroblast: 0.028| (11) PN Sustentacular: 0.054| (12) Cortex ZF: 0.009| (13) Macrophage: 0| (14) Cortex ZG: 0.029| (15) Dendritic cell: 0.01| (16) T cell: 0.034| (…
Gfra4	(1) PN NOR Chromaffin	5.13833	1.5578e-15	5.96138e-11	0.845	0.134632	(0) E ADR Chromaffin: 2.5392322294909e-153| (2) PN ADR Chromaffin: 1.59395109713451e-40| (3) Endothelial: 1.34614108517775e-185| (4) Macrophage: 1.77192937972388e-177| (5) E NOR Chromaffin: 6.85134732562245e-39| (6) E Glia|SCP: 3.27036136970725e-137| (7) Cortex ZG: 1.67244458481376e-138| (8) Cycling TH+: 1.47513572598782e-62| (9) Cortex X Zone: 1.20073154101814e-120| (10) E Neuroblast: 6.87975587…	(0) E ADR Chromaffin: 9.71713389581577e-149| (2) PN ADR Chromaffin: 6.09973205851434e-36| (3) Endothelial: 5.15141270475821e-181| (4) Macrophage: 6.78081935032735e-173| (5) E NOR Chromaffin: 2.6218735945692e-34| (6) E Glia|SCP: 1.25150188895957e-132| (7) Cortex ZG: 6.40011093716531e-134| (8) Cycling TH+: 5.6450493962102e-58| (9) Cortex X Zone: 4.59495946116822e-116| (10) E Neuroblast: 2.632744980…	(0) E ADR Chromaffin: 2.63090720424656| (2) PN ADR Chromaffin: 1.00378760994199| (3) Endothelial: 6.99248631838988| (4) Macrophage: 6.60539548545173| (5) E NOR Chromaffin: 1.1269416031294| (6) E Glia|SCP: 5.7655047747529| (7) Cortex ZG: 8.3385321205123| (8) Cycling TH+: 1.90338012261951| (9) Cortex X Zone: 7.70576486777407| (10) E Neuroblast: 3.13246089271506| (11) PN Sustentacular: 5.95614976910…	(0) E ADR Chromaffin: 0.33| (2) PN ADR Chromaffin: 0.65| (3) Endothelial: 0.019| (4) Macrophage: 0.016| (5) E NOR Chromaffin: 0.541| (6) E Glia|SCP: 0.029| (7) Cortex ZG: 0.013| (8) Cycling TH+: 0.39| (9) Cortex X Zone: 0.035| (10) E Neuroblast: 0.207| (11) PN Sustentacular: 0.036| (12) Cortex ZF: 0.027| (13) Macrophage: 0.048| (14) Cortex ZG: 0| (15) Dendritic cell: 0.01| (16) T cell: 0.011| (17…
Mmd	(1) PN NOR Chromaffin	2.75462	3.42394e-12	1.31027e-07	0.862	0.295105	(0) E ADR Chromaffin: 7.29694152265274e-153| (2) PN ADR Chromaffin: 2.01448674390022e-121| (3) Endothelial: 1.87960186638251e-81| (4) Macrophage: 5.14767444893585e-107| (5) E NOR Chromaffin: 5.77616877260237e-57| (6) E Glia|SCP: 3.72331190556545e-105| (7) Cortex ZG: 6.7939279750357e-132| (8) Cycling TH+: 3.68981488458165e-49| (9) Cortex X Zone: 7.96626316460081e-111| (10) E Neuroblast: 1.37232459…	(0) E ADR Chromaffin: 2.79239358188875e-148| (2) PN ADR Chromaffin: 7.70903787155737e-117| (3) Endothelial: 7.19286042227259e-77| (4) Macrophage: 1.96991205811877e-102| (5) E NOR Chromaffin: 2.21042426589947e-52| (6) E Glia|SCP: 1.42483700002179e-100| (7) Cortex ZG: 2.59990035748666e-127| (8) Cycling TH+: 1.41201836003171e-44| (9) Cortex X Zone: 3.04852958782944e-106| (10) E Neuroblast: 5.2516117…	(0) E ADR Chromaffin: 2.83313554482556| (2) PN ADR Chromaffin: 2.28485651025008| (3) Endothelial: 1.54337466209285| (4) Macrophage: 2.29473511123693| (5) E NOR Chromaffin: 1.71744813071485| (6) E Glia|SCP: 3.19983426969192| (7) Cortex ZG: 5.12057454598125| (8) Cycling TH+: 1.70795017454833| (9) Cortex X Zone: 4.65474110599668| (10) E Neuroblast: 1.69010350751797| (11) PN Sustentacular: 4.31154892…	(0) E ADR Chromaffin: 0.422| (2) PN ADR Chromaffin: 0.429| (3) Endothelial: 0.323| (4) Macrophage: 0.264| (5) E NOR Chromaffin: 0.585| (6) E Glia|SCP: 0.216| (7) Cortex ZG: 0.073| (8) Cycling TH+: 0.567| (9) Cortex X Zone: 0.141| (10) E Neuroblast: 0.55| (11) PN Sustentacular: 0.103| (12) Cortex ZF: 0.118| (13) Macrophage: 0.638| (14) Cortex ZG: 0.136| (15) Dendritic cell: 0.242| (16) T cell: 0.0…
Hspb8	(1) PN NOR Chromaffin	4.55595	2.57736e-18	9.86306e-14	0.989	0.359789	(0) E ADR Chromaffin: 2.3724795110294e-150| (2) PN ADR Chromaffin: 1.00574308903459e-98| (3) Endothelial: 1.92664394571132e-225| (4) Macrophage: 6.24844864457044e-228| (5) E NOR Chromaffin: 2.44130476588509e-76| (6) E Glia|SCP: 1.18221160437365e-178| (7) Cortex ZG: 4.9015904466713e-172| (8) Cycling TH+: 4.36228505209506e-92| (9) Cortex X Zone: 9.12604542046942e-138| (10) E Neuroblast: 4.081142234…	(0) E ADR Chromaffin: 9.07900459280731e-146| (2) PN ADR Chromaffin: 3.84877765311757e-94| (3) Endothelial: 7.37288105144809e-221| (4) Macrophage: 2.39115632730422e-223| (5) E NOR Chromaffin: 9.34238507808908e-72| (6) E Glia|SCP: 4.52408736761708e-174| (7) Cortex ZG: 1.87574063213217e-167| (8) Cycling TH+: 1.66935924373574e-87| (9) Cortex X Zone: 3.49235506150524e-133| (10) E Neuroblast: 1.5617715…	(0) E ADR Chromaffin: 1.70689825086529| (2) PN ADR Chromaffin: 1.25256750007777| (3) Endothelial: 5.23878070256218| (4) Macrophage: 7.75889725736415| (5) E NOR Chromaffin: 1.28127617320511| (6) E Glia|SCP: 5.75595587074458| (7) Cortex ZG: 5.19767900123203| (8) Cycling TH+: 1.91773096164474| (9) Cortex X Zone: 3.7679786200127| (10) E Neuroblast: 2.34596230286371| (11) PN Sustentacular: 6.016298062…	(0) E ADR Chromaffin: 0.822| (2) PN ADR Chromaffin: 0.916| (3) Endothelial: 0.135| (4) Macrophage: 0.084| (5) E NOR Chromaffin: 0.797| (6) E Glia|SCP: 0.136| (7) Cortex ZG: 0.12| (8) Cycling TH+: 0.733| (9) Cortex X Zone: 0.379| (10) E Neuroblast: 0.633| (11) PN Sustentacular: 0.125| (12) Cortex ZF: 0.818| (13) Macrophage: 0.181| (14) Cortex ZG: 0.078| (15) Dendritic cell: 0.051| (16) T cell: 0.1…
Dgkg	(1) PN NOR Chromaffin	4.23268	9.5468e-14	3.65337e-09	0.895	0.241316	(0) E ADR Chromaffin: 4.21209804039045e-146| (2) PN ADR Chromaffin: 1.94053605946809e-45| (3) Endothelial: 1.54079871155588e-190| (4) Macrophage: 1.38200753133556e-174| (5) E NOR Chromaffin: 1.04776132562639e-70| (6) E Glia|SCP: 3.02202675988363e-143| (7) Cortex ZG: 1.52090886085672e-141| (8) Cycling TH+: 1.57520340935138e-85| (9) Cortex X Zone: 2.98837688272202e-125| (10) E Neuroblast: 4.9687642…	(0) E ADR Chromaffin: 1.61188567809662e-141| (2) PN ADR Chromaffin: 7.42604339237249e-41| (3) Endothelial: 5.89632850938205e-186| (4) Macrophage: 5.28866642091492e-170| (5) E NOR Chromaffin: 4.00957304090707e-66| (6) E Glia|SCP: 1.15646920047227e-138| (7) Cortex ZG: 5.82021402872648e-137| (8) Cycling TH+: 6.02798840690585e-81| (9) Cortex X Zone: 1.14359206548006e-120| (10) E Neuroblast: 1.9014466…	(0) E ADR Chromaffin: 2.40103488277206| (2) PN ADR Chromaffin: 1.04040939712718| (3) Endothelial: 5.08384553512474| (4) Macrophage: 4.86004904269801| (5) E NOR Chromaffin: 1.83840421456828| (6) E Glia|SCP: 6.53659587340277| (7) Cortex ZG: 6.1284831187387| (8) Cycling TH+: 2.54085139562808| (9) Cortex X Zone: 6.89592215340271| (10) E Neuroblast: 1.2148297600985| (11) PN Sustentacular: 5.6787632605…	(0) E ADR Chromaffin: 0.385| (2) PN ADR Chromaffin: 0.674| (3) Endothelial: 0.094| (4) Macrophage: 0.11| (5) E NOR Chromaffin: 0.49| (6) E Glia|SCP: 0.165| (7) Cortex ZG: 0.13| (8) Cycling TH+: 0.337| (9) Cortex X Zone: 0.182| (10) E Neuroblast: 0.578| (11) PN Sustentacular: 0.134| (12) Cortex ZF: 0.127| (13) Macrophage: 0.143| (14) Cortex ZG: 0.214| (15) Dendritic cell: 0.313| (16) T cell: 0.114…
Fam171b	(1) PN NOR Chromaffin	5.54515	4.51147e-17	1.72645e-12	0.876	0.160316	(0) E ADR Chromaffin: 9.72446785409114e-146| (2) PN ADR Chromaffin: 1.07211009640318e-81| (3) Endothelial: 3.87185980378941e-193| (4) Macrophage: 1.6891328726051e-184| (5) E NOR Chromaffin: 5.36393615704809e-71| (6) E Glia|SCP: 9.67258625499612e-142| (7) Cortex ZG: 2.41732249944562e-147| (8) Cycling TH+: 8.86712621255098e-25| (9) Cortex X Zone: 3.25850006475172e-128| (10) E Neuroblast: 8.65229905…	(0) E ADR Chromaffin: 3.7213593584036e-141| (2) PN ADR Chromaffin: 4.10275091691567e-77| (3) Endothelial: 1.48168330971413e-188| (4) Macrophage: 6.4639736768852e-180| (5) E NOR Chromaffin: 2.05267108857916e-66| (6) E Glia|SCP: 3.70150530806192e-137| (7) Cortex ZG: 9.25060974087849e-143| (8) Cycling TH+: 3.39327185901901e-20| (9) Cortex X Zone: 1.24696280477919e-123| (10) E Neuroblast: 3.311061800…	(0) E ADR Chromaffin: 2.575159719892| (2) PN ADR Chromaffin: 1.6133762610079| (3) Endothelial: 7.27465719626077| (4) Macrophage: 7.75473733470099| (5) E NOR Chromaffin: 1.95618755233156| (6) E Glia|SCP: 5.49303409795998| (7) Cortex ZG: 8.86464783768456| (8) Cycling TH+: 1.10042555278873| (9) Cortex X Zone: 7.55144617661531| (10) E Neuroblast: 2.11904969221238| (11) PN Sustentacular: 4.84493153183…	(0) E ADR Chromaffin: 0.402| (2) PN ADR Chromaffin: 0.545| (3) Endothelial: 0.045| (4) Macrophage: 0.05| (5) E NOR Chromaffin: 0.476| (6) E Glia|SCP: 0.051| (7) Cortex ZG: 0.01| (8) Cycling TH+: 0.717| (9) Cortex X Zone: 0.029| (10) E Neuroblast: 0.406| (11) PN Sustentacular: 0.089| (12) Cortex ZF: 0.064| (13) Macrophage: 0.019| (14) Cortex ZG: 0.087| (15) Dendritic cell: 0| (16) T cell: 0| (17) …
Slco3a1	(1) PN NOR Chromaffin	3.72759	2.41613e-16	9.24604e-12	0.981	0.416421	(0) E ADR Chromaffin: 8.77481903319936e-145| (2) PN ADR Chromaffin: 5.25630716070549e-150| (3) Endothelial: 4.96906384869514e-121| (4) Macrophage: 9.51442641548168e-210| (5) E NOR Chromaffin: 5.37572097403181e-22| (6) E Glia|SCP: 5.48233146698765e-152| (7) Cortex ZG: 1.66175801537816e-169| (8) Cycling TH+: 5.732830147228e-75| (9) Cortex X Zone: 3.74248288469531e-154| (10) E Neuroblast: 5.45843372…	(0) E ADR Chromaffin: 3.35794774762473e-140| (2) PN ADR Chromaffin: 2.01148362425878e-145| (3) Endothelial: 1.90156135361866e-116| (4) Macrophage: 3.64098070067653e-205| (5) E NOR Chromaffin: 2.05718090234249e-17| (6) E Glia|SCP: 2.09797860578683e-147| (7) Cortex ZG: 6.35921557324913e-165| (8) Cycling TH+: 2.19383944074121e-70| (9) Cortex X Zone: 1.4321733503152e-149| (10) E Neuroblast: 2.0888334…	(0) E ADR Chromaffin: 1.62687036257232| (2) PN ADR Chromaffin: 1.81886470286588| (3) Endothelial: 1.85365351153724| (4) Macrophage: 4.96169195122717| (5) E NOR Chromaffin: 0.602392345491345| (6) E Glia|SCP: 3.51015303896205| (7) Cortex ZG: 5.16346378553117| (8) Cycling TH+: 1.5555094660471| (9) Cortex X Zone: 6.08953729324695| (10) E Neuroblast: 1.1823474638186| (11) PN Sustentacular: 2.069896718…	(0) E ADR Chromaffin: 0.863| (2) PN ADR Chromaffin: 0.771| (3) Endothelial: 0.483| (4) Macrophage: 0.172| (5) E NOR Chromaffin: 0.9| (6) E Glia|SCP: 0.34| (7) Cortex ZG: 0.118| (8) Cycling TH+: 0.783| (9) Cortex X Zone: 0.138| (10) E Neuroblast: 0.809| (11) PN Sustentacular: 0.536| (12) Cortex ZF: 0.045| (13) Macrophage: 0.086| (14) Cortex ZG: 0.35| (15) Dendritic cell: 0.242| (16) T cell: 0.375|…
Hlf	(1) PN NOR Chromaffin	4.73884	6.59009e-19	2.52189e-14	0.932	0.208316	(0) E ADR Chromaffin: 1.24791610380465e-142| (2) PN ADR Chromaffin: 5.25493523426843e-129| (3) Endothelial: 2.00317283231765e-191| (4) Macrophage: 4.23851532336043e-208| (5) E NOR Chromaffin: 1.16060036055836e-47| (6) E Glia|SCP: 6.33991820146872e-164| (7) Cortex ZG: 3.44387216958537e-128| (8) Cycling TH+: 3.53892253509312e-42| (9) Cortex X Zone: 1.64767143281857e-142| (10) E Neuroblast: 8.035967…	(0) E ADR Chromaffin: 4.77552534603962e-138| (2) PN ADR Chromaffin: 2.01095861544984e-124| (3) Endothelial: 7.66574179471318e-187| (4) Macrophage: 1.62199504394357e-203| (5) E NOR Chromaffin: 4.44138545978475e-43| (6) E Glia|SCP: 2.42615989733805e-159| (7) Cortex ZG: 1.31790100185693e-123| (8) Cycling TH+: 1.35427487572944e-37| (9) Cortex X Zone: 6.30530903911008e-138| (10) E Neuroblast: 3.075204…	(0) E ADR Chromaffin: 2.15787104554821| (2) PN ADR Chromaffin: 1.96120875722575| (3) Endothelial: 3.87011887210119| (4) Macrophage: 8.8061090283053| (5) E NOR Chromaffin: 1.25624622539018| (6) E Glia|SCP: 6.67679032182288| (7) Cortex ZG: 3.52921189417242| (8) Cycling TH+: 1.34698040707213| (9) Cortex X Zone: 7.23416399552382| (10) E Neuroblast: 1.86531919792431| (11) PN Sustentacular: 6.360296800…	(0) E ADR Chromaffin: 0.548| (2) PN ADR Chromaffin: 0.497| (3) Endothelial: 0.082| (4) Macrophage: 0.036| (5) E NOR Chromaffin: 0.663| (6) E Glia|SCP: 0.036| (7) Cortex ZG: 0.208| (8) Cycling TH+: 0.714| (9) Cortex X Zone: 0.047| (10) E Neuroblast: 0.538| (11) PN Sustentacular: 0.045| (12) Cortex ZF: 0.118| (13) Macrophage: 0.029| (14) Cortex ZG: 0.068| (15) Dendritic cell: 0.03| (16) T cell: 0.0…
Fam3c	(1) PN NOR Chromaffin	2.41275	4.79748e-19	1.8359e-14	0.962	0.637105	(0) E ADR Chromaffin: 1.31113303936057e-134| (2) PN ADR Chromaffin: 4.35244530480773e-51| (3) Endothelial: 9.93708395846456e-126| (4) Macrophage: 3.06834336426189e-124| (5) E NOR Chromaffin: 4.82631969204032e-25| (6) E Glia|SCP: 2.23065574509044e-85| (7) Cortex ZG: 1.36205901603205e-35| (8) Cycling TH+: 2.80954965015835e-78| (9) Cortex X Zone: 4.7240645596024e-116| (10) E Neuroblast: 6.8311944388…	(0) E ADR Chromaffin: 5.01744391502505e-130| (2) PN ADR Chromaffin: 1.66559376924382e-46| (3) Endothelial: 3.80272328922522e-121| (4) Macrophage: 1.17419363863574e-119| (5) E NOR Chromaffin: 1.84693601974999e-20| (6) E Glia|SCP: 8.5362734053121e-81| (7) Cortex ZG: 5.21232744255146e-31| (8) Cycling TH+: 1.0751584601226e-73| (9) Cortex X Zone: 1.80780502566864e-111| (10) E Neuroblast: 2.61416148785…	(0) E ADR Chromaffin: 1.9065479017779| (2) PN ADR Chromaffin: 0.995959878040775| (3) Endothelial: 2.31483948579331| (4) Macrophage: 2.3681427615186| (5) E NOR Chromaffin: 0.747271461593035| (6) E Glia|SCP: 2.02623344917859| (7) Cortex ZG: 1.09106518980715| (8) Cycling TH+: 1.97612388041284| (9) Cortex X Zone: 3.4414258171117| (10) E Neuroblast: 4.05538846147411| (11) PN Sustentacular: 1.864084786…	(0) E ADR Chromaffin: 0.777| (2) PN ADR Chromaffin: 0.901| (3) Endothelial: 0.571| (4) Macrophage: 0.639| (5) E NOR Chromaffin: 0.878| (6) E Glia|SCP: 0.774| (7) Cortex ZG: 0.945| (8) Cycling TH+: 0.757| (9) Cortex X Zone: 0.597| (10) E Neuroblast: 0.406| (11) PN Sustentacular: 0.714| (12) Cortex ZF: 0.464| (13) Macrophage: 0.714| (14) Cortex ZG: 0.854| (15) Dendritic cell: 0.444| (16) T cell: 0.…
Chrnb4	(1) PN NOR Chromaffin	6.0719	6.49996e-16	2.4874e-11	0.838	0.123526	(0) E ADR Chromaffin: 7.56579665035065e-134| (2) PN ADR Chromaffin: 1.8143384126383e-38| (3) Endothelial: 6.29648571999738e-184| (4) Macrophage: 7.84201916894946e-172| (5) E NOR Chromaffin: 8.32948491853927e-44| (6) E Glia|SCP: 1.45589510312328e-137| (7) Cortex ZG: 3.06623431780363e-136| (8) Cycling TH+: 6.64134773862722e-70| (9) Cortex X Zone: 1.7352980550145e-120| (10) E Neuroblast: 4.718033284…	(0) E ADR Chromaffin: 2.89527906215618e-129| (2) PN ADR Chromaffin: 6.94311023748426e-34| (3) Endothelial: 2.4095391553286e-179| (4) Macrophage: 3.00098389557358e-167| (5) E NOR Chromaffin: 3.18752728862661e-39| (6) E Glia|SCP: 5.57141938063217e-133| (7) Cortex ZG: 1.17338654873709e-131| (8) Cycling TH+: 2.54151095261786e-65| (9) Cortex X Zone: 6.64063859692949e-116| (10) E Neuroblast: 1.80549697…	(0) E ADR Chromaffin: 2.42477123727913| (2) PN ADR Chromaffin: 0.973236523823514| (3) Endothelial: 9.39597642124394| (4) Macrophage: 7.36973638617499| (5) E NOR Chromaffin: 1.32007698507219| (6) E Glia|SCP: 6.79821331221557| (7) Cortex ZG: 8.12611432920618| (8) Cycling TH+: 2.30100217971139| (9) Cortex X Zone: 8.96116984473633| (10) E Neuroblast: 2.00858745689453| (11) PN Sustentacular: 6.8573401…	(0) E ADR Chromaffin: 0.338| (2) PN ADR Chromaffin: 0.636| (3) Endothelial: 0.024| (4) Macrophage: 0.039| (5) E NOR Chromaffin: 0.476| (6) E Glia|SCP: 0.019| (7) Cortex ZG: 0.013| (8) Cycling TH+: 0.326| (9) Cortex X Zone: 0.015| (10) E Neuroblast: 0.263| (11) PN Sustentacular: 0.062| (12) Cortex ZF: 0.027| (13) Macrophage: 0.019| (14) Cortex ZG: 0.039| (15) Dendritic cell: 0.01| (16) T cell: 0.0…
Aldh1a3	(1) PN NOR Chromaffin	5.77765	2.90508e-17	1.11172e-12	0.908	0.228368	(0) E ADR Chromaffin: 4.45926576116401e-132| (2) PN ADR Chromaffin: 1.12295826432745e-157| (3) Endothelial: 1.71225986804823e-200| (4) Macrophage: 2.64421523414983e-195| (5) E NOR Chromaffin: 1.53717588223174e-37| (6) E Glia|SCP: 3.31029274348602e-16| (7) Cortex ZG: 8.18010959029047e-148| (8) Cycling TH+: 5.8865087421486e-81| (9) Cortex X Zone: 9.6691107784675e-135| (10) E Neuroblast: 5.281063858…	(0) E ADR Chromaffin: 1.70647182148224e-127| (2) PN ADR Chromaffin: 4.29733668592828e-153| (3) Endothelial: 6.55247606304695e-196| (4) Macrophage: 1.01188828580446e-190| (5) E NOR Chromaffin: 5.88246466612444e-33| (6) E Glia|SCP: 1.26678282707723e-11| (7) Cortex ZG: 3.13036433801236e-143| (8) Cycling TH+: 2.25264916544543e-76| (9) Cortex X Zone: 3.70017531270394e-130| (10) E Neuroblast: 2.0209575…	(0) E ADR Chromaffin: 2.64359652347077| (2) PN ADR Chromaffin: 3.28434807488667| (3) Endothelial: 7.46141326266111| (4) Macrophage: 8.64997072173778| (5) E NOR Chromaffin: 1.45387766727738| (6) E Glia|SCP: 1.37317739135501| (7) Cortex ZG: 6.60831798967121| (8) Cycling TH+: 2.87612623269328| (9) Cortex X Zone: 8.07333153979446| (10) E Neuroblast: 8.43128533279623| (11) PN Sustentacular: 2.00700079…	(0) E ADR Chromaffin: 0.451| (2) PN ADR Chromaffin: 0.379| (3) Endothelial: 0.086| (4) Macrophage: 0.063| (5) E NOR Chromaffin: 0.602| (6) E Glia|SCP: 0.818| (7) Cortex ZG: 0.068| (8) Cycling TH+: 0.409| (9) Cortex X Zone: 0.065| (10) E Neuroblast: 0.048| (11) PN Sustentacular: 0.571| (12) Cortex ZF: 0.073| (13) Macrophage: 0.086| (14) Cortex ZG: 0.087| (15) Dendritic cell: 0.121| (16) T cell: 0.…
Gpr22	(1) PN NOR Chromaffin	5.11384	2.02748e-18	7.75875e-14	0.92	0.239368	(0) E ADR Chromaffin: 1.40377332496277e-127| (2) PN ADR Chromaffin: 2.06541125378259e-83| (3) Endothelial: 6.81600623033239e-206| (4) Macrophage: 5.70672138272762e-197| (5) E NOR Chromaffin: 7.15250403338964e-26| (6) E Glia|SCP: 7.05381647131765e-160| (7) Cortex ZG: 4.30551480070873e-159| (8) Cycling TH+: 1.9171064012457e-27| (9) Cortex X Zone: 4.67419025543403e-140| (10) E Neuroblast: 1.09343738…	(0) E ADR Chromaffin: 5.37195975996751e-123| (2) PN ADR Chromaffin: 7.90391578597523e-79| (3) Endothelial: 2.6083492642236e-201| (4) Macrophage: 2.1838481387422e-192| (5) E NOR Chromaffin: 2.73712024349755e-21| (6) E Glia|SCP: 2.69935448724384e-155| (7) Cortex ZG: 1.64763440393522e-154| (8) Cycling TH+: 7.33638277628704e-23| (9) Cortex X Zone: 1.7887191269495e-135| (10) E Neuroblast: 4.1843662007…	(0) E ADR Chromaffin: 2.08817962988802| (2) PN ADR Chromaffin: 1.4368020186714| (3) Endothelial: 5.99724562730446| (4) Macrophage: 6.19601696001866| (5) E NOR Chromaffin: 0.914009502602841| (6) E Glia|SCP: 6.82726979728841| (7) Cortex ZG: 8.1539669044519| (8) Cycling TH+: 1.08782411089413| (9) Cortex X Zone: 7.86290507974652| (10) E Neuroblast: 1.47119498446945| (11) PN Sustentacular: 6.534913315…	(0) E ADR Chromaffin: 0.66| (2) PN ADR Chromaffin: 0.702| (3) Endothelial: 0.062| (4) Macrophage: 0.066| (5) E NOR Chromaffin: 0.809| (6) E Glia|SCP: 0.056| (7) Cortex ZG: 0.03| (8) Cycling TH+: 0.842| (9) Cortex X Zone: 0.047| (10) E Neuroblast: 0.717| (11) PN Sustentacular: 0.062| (12) Cortex ZF: 0.045| (13) Macrophage: 0.038| (14) Cortex ZG: 0.117| (15) Dendritic cell: 0.051| (16) T cell: 0.10…
Lrrc3	(1) PN NOR Chromaffin	4.34852	2.65177e-11	1.01478e-06	0.86	0.189632	(0) E ADR Chromaffin: 2.45194705028066e-126| (2) PN ADR Chromaffin: 4.48330140056212e-94| (3) Endothelial: 5.58312741526844e-163| (4) Macrophage: 1.80614535631466e-108| (5) E NOR Chromaffin: 8.6139324196564e-60| (6) E Glia|SCP: 4.1244719280829e-133| (7) Cortex ZG: 7.93656892636351e-132| (8) Cycling TH+: 4.47920836252973e-71| (9) Cortex X Zone: 8.19005282904908e-121| (10) E Neuroblast: 1.813938170…	(0) E ADR Chromaffin: 9.38311097201402e-122| (2) PN ADR Chromaffin: 1.71566977996711e-89| (3) Endothelial: 2.13655119927493e-158| (4) Macrophage: 6.91175704954494e-104| (5) E NOR Chromaffin: 3.29637965835411e-55| (6) E Glia|SCP: 1.57835291743877e-128| (7) Cortex ZG: 3.03716619674079e-127| (8) Cycling TH+: 1.71410345617288e-66| (9) Cortex X Zone: 3.1341694166205e-116| (10) E Neuroblast: 6.94157859…	(0) E ADR Chromaffin: 2.41259327270603| (2) PN ADR Chromaffin: 1.94539180904435| (3) Endothelial: 3.64110500255699| (4) Macrophage: 2.24974508521532| (5) E NOR Chromaffin: 1.76427033509375| (6) E Glia|SCP: 4.92908984939723| (7) Cortex ZG: 5.19331782828868| (8) Cycling TH+: 2.4929528936152| (9) Cortex X Zone: 6.62746632844156| (10) E Neuroblast: 1.8494761099754| (11) PN Sustentacular: 5.1799017828…	(0) E ADR Chromaffin: 0.425| (2) PN ADR Chromaffin: 0.486| (3) Endothelial: 0.109| (4) Macrophage: 0.241| (5) E NOR Chromaffin: 0.486| (6) E Glia|SCP: 0.073| (7) Cortex ZG: 0.06| (8) Cycling TH+: 0.401| (9) Cortex X Zone: 0.056| (10) E Neuroblast: 0.558| (11) PN Sustentacular: 0.08| (12) Cortex ZF: 0.064| (13) Macrophage: 0.076| (14) Cortex ZG: 0.039| (15) Dendritic cell: 0.03| (16) T cell: 0.023…
RP23-121N17.2	(1) PN NOR Chromaffin	5.15641	1.48326e-16	5.67612e-12	0.967	0.318684	(0) E ADR Chromaffin: 8.71962713606075e-125| (2) PN ADR Chromaffin: 2.81502620795359e-15| (3) Endothelial: 2.68672216076535e-224| (4) Macrophage: 2.04682881044037e-212| (5) E NOR Chromaffin: 4.01378937487376e-19| (6) E Glia|SCP: 2.3219750628623e-93| (7) Cortex ZG: 2.66305843931497e-173| (8) Cycling TH+: 7.58328989147419e-95| (9) Cortex X Zone: 9.94238661959203e-153| (10) E Neuroblast: 5.374418342…	(0) E ADR Chromaffin: 3.33682691242773e-120| (2) PN ADR Chromaffin: 1.07725422925968e-10| (3) Endothelial: 1.02815483648168e-219| (4) Macrophage: 7.83280449179322e-208| (5) E NOR Chromaffin: 1.53599691797669e-14| (6) E Glia|SCP: 8.88573417056147e-89| (7) Cortex ZG: 1.01909920355705e-168| (8) Cycling TH+: 2.90197337566934e-90| (9) Cortex X Zone: 3.80475251158548e-148| (10) E Neuroblast: 2.05668241…	(0) E ADR Chromaffin: 1.94329920893814| (2) PN ADR Chromaffin: 0.5611911914502| (3) Endothelial: 7.07079570719271| (4) Macrophage: 6.8300629174122| (5) E NOR Chromaffin: 0.758725474709512| (6) E Glia|SCP: 2.37790281588789| (7) Cortex ZG: 7.92145097201056| (8) Cycling TH+: 2.4707743137087| (9) Cortex X Zone: 8.05180147125642| (10) E Neuroblast: 6.50814580558138| (11) PN Sustentacular: 1.1200626382…	(0) E ADR Chromaffin: 0.753| (2) PN ADR Chromaffin: 0.91| (3) Endothelial: 0.113| (4) Macrophage: 0.149| (5) E NOR Chromaffin: 0.801| (6) E Glia|SCP: 0.667| (7) Cortex ZG: 0.025| (8) Cycling TH+: 0.54| (9) Cortex X Zone: 0.071| (10) E Neuroblast: 0.127| (11) PN Sustentacular: 0.768| (12) Cortex ZF: 0.064| (13) Macrophage: 0.095| (14) Cortex ZG: 0.214| (15) Dendritic cell: 0.081| (16) T cell: 0.17…
Cyb561	(1) PN NOR Chromaffin	5.24449	2.45501e-21	9.39483e-17	1	0.625947	(0) E ADR Chromaffin: 1.0042412155228e-117| (2) PN ADR Chromaffin: 6.20927851027854e-102| (3) Endothelial: 5.50408725691183e-237| (4) Macrophage: 1.58104742169322e-227| (5) E NOR Chromaffin: 3.42748408598358e-129| (6) E Glia|SCP: 8.87684146575724e-186| (7) Cortex ZG: 3.11273808166368e-180| (8) Cycling TH+: 9.05249007007277e-135| (9) Cortex X Zone: 1.0318365814601e-161| (10) E Neuroblast: 5.632955…	(0) E ADR Chromaffin: 3.84303028356264e-113| (2) PN ADR Chromaffin: 2.37616670031339e-97| (3) Endothelial: 2.10630411147502e-232| (4) Macrophage: 6.05035227333561e-223| (5) E NOR Chromaffin: 1.31162961002419e-124| (6) E Glia|SCP: 3.39698969211598e-181| (7) Cortex ZG: 1.19118260909106e-175| (8) Cycling TH+: 3.46420690001545e-130| (9) Cortex X Zone: 3.94863222993151e-157| (10) E Neuroblast: 2.15561…	(0) E ADR Chromaffin: 0.698242354694876| (2) PN ADR Chromaffin: 0.669073672815172| (3) Endothelial: 7.47665825790956| (4) Macrophage: 7.85967324193326| (5) E NOR Chromaffin: 1.2427478997058| (6) E Glia|SCP: 7.28966023052601| (7) Cortex ZG: 4.9932280329725| (8) Cycling TH+: 1.59028214326272| (9) Cortex X Zone: 5.59894603873922| (10) E Neuroblast: 1.07036761770664| (11) PN Sustentacular: 8.35166212…	(0) E ADR Chromaffin: 0.998| (2) PN ADR Chromaffin: 0.998| (3) Endothelial: 0.323| (4) Macrophage: 0.346| (5) E NOR Chromaffin: 0.98| (6) E Glia|SCP: 0.408| (7) Cortex ZG: 0.717| (8) Cycling TH+: 0.981| (9) Cortex X Zone: 0.771| (10) E Neuroblast: 1| (11) PN Sustentacular: 0.527| (12) Cortex ZF: 0.891| (13) Macrophage: 0.4| (14) Cortex ZG: 0.874| (15) Dendritic cell: 0.374| (16) T cell: 0.364| (1…
Chrna3	(1) PN NOR Chromaffin	5.5122	2.3727e-20	9.07984e-16	0.986	0.283789	(0) E ADR Chromaffin: 3.34775785856469e-115| (2) PN ADR Chromaffin: 2.60312917385354e-38| (3) Endothelial: 5.20138301185758e-235| (4) Macrophage: 1.27573087364844e-227| (5) E NOR Chromaffin: 3.72803582792111e-63| (6) E Glia|SCP: 1.59761336389778e-181| (7) Cortex ZG: 9.03366033166315e-181| (8) Cycling TH+: 3.26572427109498e-79| (9) Cortex X Zone: 2.31552440472314e-159| (10) E Neuroblast: 5.8806824…	(0) E ADR Chromaffin: 1.28111997731554e-110| (2) PN ADR Chromaffin: 9.96165472250274e-34| (3) Endothelial: 1.99046525097766e-230| (4) Macrophage: 4.88196690727785e-223| (5) E NOR Chromaffin: 1.42664475062885e-58| (6) E Glia|SCP: 6.11374682096404e-177| (7) Cortex ZG: 3.45700113572086e-176| (8) Cycling TH+: 1.24972736406263e-74| (9) Cortex X Zone: 8.86104879199452e-155| (10) E Neuroblast: 2.2504195…	(0) E ADR Chromaffin: 1.38684894951921| (2) PN ADR Chromaffin: 0.718727690007823| (3) Endothelial: 6.53769156759142| (4) Macrophage: 8.19521008181023| (5) E NOR Chromaffin: 1.20366404107012| (6) E Glia|SCP: 6.73691889053768| (7) Cortex ZG: 8.47536344607347| (8) Cycling TH+: 1.65408986668744| (9) Cortex X Zone: 8.28661226703584| (10) E Neuroblast: 1.19359906582052| (11) PN Sustentacular: 7.4018856…	(0) E ADR Chromaffin: 0.912| (2) PN ADR Chromaffin: 0.955| (3) Endothelial: 0.062| (4) Macrophage: 0.072| (5) E NOR Chromaffin: 0.882| (6) E Glia|SCP: 0.078| (7) Cortex ZG: 0.02| (8) Cycling TH+: 0.81| (9) Cortex X Zone: 0.076| (10) E Neuroblast: 0.88| (11) PN Sustentacular: 0.134| (12) Cortex ZF: 0.045| (13) Macrophage: 0.057| (14) Cortex ZG: 0.087| (15) Dendritic cell: 0.111| (16) T cell: 0.08|…
Apobec2	(1) PN NOR Chromaffin	5.10639	1.35432e-08	0.00051827	0.528	0.0513158	(0) E ADR Chromaffin: 8.49433643237602e-111| (2) PN ADR Chromaffin: 1.34528483095992e-19| (3) Endothelial: 3.53743669123272e-90| (4) Macrophage: 9.58814506612519e-90| (5) E NOR Chromaffin: 6.81950673663159e-27| (6) E Glia|SCP: 6.13254417171549e-65| (7) Cortex ZG: 3.28994747975876e-68| (8) Cycling TH+: 2.48764042973961e-52| (9) Cortex X Zone: 3.43660168299569e-55| (10) E Neuroblast: 6.664978200374…	(0) E ADR Chromaffin: 3.25061266594165e-106| (2) PN ADR Chromaffin: 5.14813599111743e-15| (3) Endothelial: 1.35370627300094e-85| (4) Macrophage: 3.66919135390479e-85| (5) E NOR Chromaffin: 2.60968883797418e-22| (6) E Glia|SCP: 2.34680200363209e-60| (7) Cortex ZG: 1.25899710155408e-63| (8) Cycling TH+: 9.51970239652755e-48| (9) Cortex X Zone: 1.31511873204879e-50| (10) E Neuroblast: 2.550553857719…	(0) E ADR Chromaffin: 3.81487713304388| (2) PN ADR Chromaffin: 1.01879436881989| (3) Endothelial: 6.17507388425707| (4) Macrophage: 7.41405953215393| (5) E NOR Chromaffin: 1.4389296503699| (6) E Glia|SCP: 5.59862184409534| (7) Cortex ZG: 7.38865010649773| (8) Cycling TH+: 4.49657517642974| (9) Cortex X Zone: 6.63107541781984| (10) E Neuroblast: 6.28020358274908| (11) PN Sustentacular: 4.509557772…	(0) E ADR Chromaffin: 0.076| (2) PN ADR Chromaffin: 0.334| (3) Endothelial: 0.022| (4) Macrophage: 0.007| (5) E NOR Chromaffin: 0.224| (6) E Glia|SCP: 0.029| (7) Cortex ZG: 0.005| (8) Cycling TH+: 0.075| (9) Cortex X Zone: 0.038| (10) E Neuroblast: 0.024| (11) PN Sustentacular: 0.036| (12) Cortex ZF: 0| (13) Macrophage: 0.029| (14) Cortex ZG: 0.01| (15) Dendritic cell: 0.03| (16) T cell: 0.023| (…
Grm7	(1) PN NOR Chromaffin	4.60523	3.35081e-10	1.28229e-05	0.612	0.0766316	(0) E ADR Chromaffin: 4.91769721447198e-109| (2) PN ADR Chromaffin: 2.48629829534771e-49| (3) Endothelial: 1.47893846402253e-111| (4) Macrophage: 2.03732947436721e-109| (5) E NOR Chromaffin: 3.23734389822848e-10| (6) E Glia|SCP: 5.91085303379092e-84| (7) Cortex ZG: 7.14650856604192e-82| (8) Cycling TH+: 9.36859902771943e-46| (9) Cortex X Zone: 5.68502529576847e-72| (10) E Neuroblast: 3.4912802896…	(0) E ADR Chromaffin: 1.88190437003414e-104| (2) PN ADR Chromaffin: 9.51456631663663e-45| (3) Endothelial: 5.6596017141214e-107| (4) Macrophage: 7.79645243250843e-105| (5) E NOR Chromaffin: 1.23886676297407e-05| (6) E Glia|SCP: 2.26196523897111e-79| (7) Cortex ZG: 2.73482589805292e-77| (8) Cycling TH+: 3.58517547592767e-41| (9) Cortex X Zone: 2.17554548018468e-67| (10) E Neuroblast: 1.33604314125…	(0) E ADR Chromaffin: 3.14112338434094| (2) PN ADR Chromaffin: 1.71700427802765| (3) Endothelial: 5.60876554484767| (4) Macrophage: 7.64176216349652| (5) E NOR Chromaffin: 0.663388963868379| (6) E Glia|SCP: 6.5632849328257| (7) Cortex ZG: 5.93935928272027| (8) Cycling TH+: 2.84604215520082| (9) Cortex X Zone: 6.5123331759339| (10) E Neuroblast: 3.40756762866995| (11) PN Sustentacular: 4.309516203…	(0) E ADR Chromaffin: 0.14| (2) PN ADR Chromaffin: 0.281| (3) Endothelial: 0.019| (4) Macrophage: 0.011| (5) E NOR Chromaffin: 0.431| (6) E Glia|SCP: 0.017| (7) Cortex ZG: 0.013| (8) Cycling TH+: 0.184| (9) Cortex X Zone: 0.015| (10) E Neuroblast: 0.108| (11) PN Sustentacular: 0.045| (12) Cortex ZF: 0.009| (13) Macrophage: 0.057| (14) Cortex ZG: 0.019| (15) Dendritic cell: 0| (16) T cell: 0.023| …
Adcyap1r1	(1) PN NOR Chromaffin	5.55877	3.34546e-21	1.28024e-16	0.997	0.327579	(0) E ADR Chromaffin: 6.31430506376799e-103| (2) PN ADR Chromaffin: 2.73749625554498e-37| (3) Endothelial: 2.42439739867414e-242| (4) Macrophage: 1.51776157352111e-231| (5) E NOR Chromaffin: 1.03584159443201e-33| (6) E Glia|SCP: 1.27641487441596e-185| (7) Cortex ZG: 4.6953228580748e-184| (8) Cycling TH+: 2.88088635843873e-73| (9) Cortex X Zone: 3.41385019765339e-161| (10) E Neuroblast: 1.91526819…	(0) E ADR Chromaffin: 2.41635826180273e-98| (2) PN ADR Chromaffin: 1.04758506707195e-32| (3) Endothelial: 9.2776839652462e-238| (4) Macrophage: 5.8081699895506e-227| (5) E NOR Chromaffin: 3.96395861357241e-29| (6) E Glia|SCP: 4.88458444141501e-181| (7) Cortex ZG: 1.79680615132806e-179| (8) Cycling TH+: 1.10245759164733e-68| (9) Cortex X Zone: 1.306412193638e-156| (10) E Neuroblast: 7.329348310670…	(0) E ADR Chromaffin: 0.956057810849999| (2) PN ADR Chromaffin: 0.52418027742481| (3) Endothelial: 7.35164754599309| (4) Macrophage: 7.83253900861489| (5) E NOR Chromaffin: 0.60316512367637| (6) E Glia|SCP: 6.5925282822068| (7) Cortex ZG: 8.09900611609491| (8) Cycling TH+: 1.17426148692307| (9) Cortex X Zone: 6.31952690059058| (10) E Neuroblast: 1.27940159625081| (11) PN Sustentacular: 7.01960593…	(0) E ADR Chromaffin: 0.975| (2) PN ADR Chromaffin: 0.974| (3) Endothelial: 0.064| (4) Macrophage: 0.09| (5) E NOR Chromaffin: 0.984| (6) E Glia|SCP: 0.092| (7) Cortex ZG: 0.038| (8) Cycling TH+: 0.944| (9) Cortex X Zone: 0.156| (10) E Neuroblast: 0.948| (11) PN Sustentacular: 0.179| (12) Cortex ZF: 0.064| (13) Macrophage: 0.086| (14) Cortex ZG: 0.126| (15) Dendritic cell: 0.061| (16) T cell: 0.0…
Ache	(1) PN NOR Chromaffin	5.08657	1.37282e-09	5.25351e-05	0.802	0.148105	(0) E ADR Chromaffin: 2.90739026282306e-102| (2) PN ADR Chromaffin: 2.60834599048627e-08| (3) Endothelial: 2.86573149873136e-156| (4) Macrophage: 4.42756430839825e-160| (5) E NOR Chromaffin: 7.07843675048237e-88| (6) E Glia|SCP: 5.96539698537699e-119| (7) Cortex ZG: 2.54471216179178e-127| (8) Cycling TH+: 4.4097710590358e-86| (9) Cortex X Zone: 1.92734657731435e-104| (10) E Neuroblast: 2.84247702…	(0) E ADR Chromaffin: 1.11260010577713e-97| (2) PN ADR Chromaffin: 0.000998161843639284| (3) Endothelial: 1.09665812993452e-151| (4) Macrophage: 1.69434030953784e-155| (5) E NOR Chromaffin: 2.70877617567459e-83| (6) E Glia|SCP: 2.28283811836407e-114| (7) Cortex ZG: 9.73810450074478e-123| (8) Cycling TH+: 1.68753118887182e-81| (9) Cortex X Zone: 7.37556988206657e-100| (10) E Neuroblast: 1.08775910…	(0) E ADR Chromaffin: 2.18460663535497| (2) PN ADR Chromaffin: 0.500210707743574| (3) Endothelial: 5.16358858812112| (4) Macrophage: 7.42499257013525| (5) E NOR Chromaffin: 2.67779420358308| (6) E Glia|SCP: 5.17229338611598| (7) Cortex ZG: 9.28832491490622| (8) Cycling TH+: 3.69117469619067| (9) Cortex X Zone: 7.19812689287858| (10) E Neuroblast: 1.73392727223445| (11) PN Sustentacular: 4.6077106…	(0) E ADR Chromaffin: 0.391| (2) PN ADR Chromaffin: 0.763| (3) Endothelial: 0.067| (4) Macrophage: 0.034| (5) E NOR Chromaffin: 0.27| (6) E Glia|SCP: 0.063| (7) Cortex ZG: 0.01| (8) Cycling TH+: 0.246| (9) Cortex X Zone: 0.097| (10) E Neuroblast: 0.386| (11) PN Sustentacular: 0.112| (12) Cortex ZF: 0.055| (13) Macrophage: 0.038| (14) Cortex ZG: 0.039| (15) Dendritic cell: 0.04| (16) T cell: 0.034…
Cntn1	(1) PN NOR Chromaffin	4.61234	2.08448e-08	0.000797688	0.572	0.0992105	(0) E ADR Chromaffin: 3.65904945637789e-97| (2) PN ADR Chromaffin: 4.58328357084184e-38| (3) Endothelial: 1.36518761126977e-95| (4) Macrophage: 4.11325417055241e-95| (5) E NOR Chromaffin: 3.23805491279515e-20| (6) E Glia|SCP: 1.38179414759844e-65| (7) Cortex ZG: 2.90221722180612e-76| (8) Cycling TH+: 1.81748616165408e-20| (9) Cortex X Zone: 3.26884916041116e-55| (10) E Neuroblast: 2.2910194969302…	(0) E ADR Chromaffin: 1.40024504596669e-92| (2) PN ADR Chromaffin: 1.75393095688975e-33| (3) Endothelial: 5.22429995080714e-91| (4) Macrophage: 1.574060105987e-90| (5) E NOR Chromaffin: 1.23913885402845e-15| (6) E Glia|SCP: 5.28784984402973e-61| (7) Cortex ZG: 1.11062048644077e-71| (8) Cycling TH+: 6.95515604341784e-16| (9) Cortex X Zone: 1.25092319670614e-50| (10) E Neuroblast: 8.76727341085276e…	(0) E ADR Chromaffin: 3.09274103065748| (2) PN ADR Chromaffin: 1.39398987574651| (3) Endothelial: 5.93632129335781| (4) Macrophage: 5.84112256866806| (5) E NOR Chromaffin: 1.26455738755247| (6) E Glia|SCP: 4.26689439804009| (7) Cortex ZG: 8.41903316885406| (8) Cycling TH+: 1.58672868816587| (9) Cortex X Zone: 4.62112571070956| (10) E Neuroblast: 2.05797652750549| (11) PN Sustentacular: 4.95733392…	(0) E ADR Chromaffin: 0.133| (2) PN ADR Chromaffin: 0.278| (3) Endothelial: 0.044| (4) Macrophage: 0.025| (5) E NOR Chromaffin: 0.329| (6) E Glia|SCP: 0.063| (7) Cortex ZG: 0.008| (8) Cycling TH+: 0.307| (9) Cortex X Zone: 0.076| (10) E Neuroblast: 0.207| (11) PN Sustentacular: 0.058| (12) Cortex ZF: 0.009| (13) Macrophage: 0.095| (14) Cortex ZG: 0.039| (15) Dendritic cell: 0.04| (16) T cell: 0.0…
Rgs9	(1) PN NOR Chromaffin	3.79593	9.37733e-10	3.58852e-05	0.626	0.0982105	(0) E ADR Chromaffin: 4.35847779028476e-97| (2) PN ADR Chromaffin: 1.21282719466337e-29| (3) Endothelial: 2.35709559064099e-105| (4) Macrophage: 3.479103970239e-108| (5) E NOR Chromaffin: 3.02961664974732e-41| (6) E Glia|SCP: 1.20880670938623e-75| (7) Cortex ZG: 7.2636582754469e-81| (8) Cycling TH+: 1.69988781468668e-18| (9) Cortex X Zone: 7.30224234316406e-71| (10) E Neuroblast: 1.16455280142384…	(0) E ADR Chromaffin: 1.66790228078617e-92| (2) PN ADR Chromaffin: 4.64124710853778e-25| (3) Endothelial: 9.02013340626494e-101| (4) Macrophage: 1.33138350733106e-103| (5) E NOR Chromaffin: 1.1593736995253e-36| (6) E Glia|SCP: 4.62586151547923e-71| (7) Cortex ZG: 2.77965674884802e-76| (8) Cycling TH+: 6.50513068924299e-14| (9) Cortex X Zone: 2.79442209988202e-66| (10) E Neuroblast: 4.456510660488…	(0) E ADR Chromaffin: 2.66957840319004| (2) PN ADR Chromaffin: 1.10375800548401| (3) Endothelial: 3.7992598111843| (4) Macrophage: 5.62141100611064| (5) E NOR Chromaffin: 1.83757565177316| (6) E Glia|SCP: 4.14048088352023| (7) Cortex ZG: 4.84404215838738| (8) Cycling TH+: 1.16480586220387| (9) Cortex X Zone: 5.11955522324437| (10) E Neuroblast: 2.89414685271222| (11) PN Sustentacular: 4.369184821…	(0) E ADR Chromaffin: 0.176| (2) PN ADR Chromaffin: 0.371| (3) Endothelial: 0.049| (4) Macrophage: 0.027| (5) E NOR Chromaffin: 0.252| (6) E Glia|SCP: 0.058| (7) Cortex ZG: 0.028| (8) Cycling TH+: 0.385| (9) Cortex X Zone: 0.032| (10) E Neuroblast: 0.131| (11) PN Sustentacular: 0.062| (12) Cortex ZF: 0.018| (13) Macrophage: 0.067| (14) Cortex ZG: 0.068| (15) Dendritic cell: 0.02| (16) T cell: 0.0…
Zfp467	(1) PN NOR Chromaffin	2.41567	2.72038e-18	1.04103e-13	0.959	0.450895	(0) E ADR Chromaffin: 9.92772528684344e-97| (2) PN ADR Chromaffin: 2.66847710776597e-97| (3) Endothelial: 1.0294885031218e-104| (4) Macrophage: 2.11240547251242e-162| (5) E NOR Chromaffin: 1.1732940583982e-41| (6) E Glia|SCP: 8.19351339765809e-47| (7) Cortex ZG: 7.47033005898388e-111| (8) Cycling TH+: 6.79101915049869e-107| (9) Cortex X Zone: 1.96448441551588e-77| (10) E Neuroblast: 9.43928501505…	(0) E ADR Chromaffin: 3.79914191276925e-92| (2) PN ADR Chromaffin: 1.02117281959988e-92| (3) Endothelial: 3.93964660374652e-100| (4) Macrophage: 8.08375326221053e-158| (5) E NOR Chromaffin: 4.48996170267825e-37| (6) E Glia|SCP: 3.1354937070158e-42| (7) Cortex ZG: 2.85874590697195e-106| (8) Cycling TH+: 2.59878720851284e-102| (9) Cortex X Zone: 7.51768896129618e-73| (10) E Neuroblast: 3.6122255895…	(0) E ADR Chromaffin: 1.44219302781402| (2) PN ADR Chromaffin: 1.50959696386324| (3) Endothelial: 1.63977239758169| (4) Macrophage: 3.21115965861761| (5) E NOR Chromaffin: 1.06348902738717| (6) E Glia|SCP: 1.19985465136627| (7) Cortex ZG: 2.63756023930493| (8) Cycling TH+: 2.66367888779072| (9) Cortex X Zone: 2.06634030277087| (10) E Neuroblast: 1.77071235655707| (11) PN Sustentacular: 2.10812752…	(0) E ADR Chromaffin: 0.713| (2) PN ADR Chromaffin: 0.682| (3) Endothelial: 0.431| (4) Macrophage: 0.296| (5) E NOR Chromaffin: 0.75| (6) E Glia|SCP: 0.667| (7) Cortex ZG: 0.436| (8) Cycling TH+: 0.452| (9) Cortex X Zone: 0.638| (10) E Neuroblast: 0.598| (11) PN Sustentacular: 0.379| (12) Cortex ZF: 0.336| (13) Macrophage: 0.552| (14) Cortex ZG: 0.495| (15) Dendritic cell: 0.222| (16) T cell: 0.1…
Pacsin1	(1) PN NOR Chromaffin	4.1308	3.96057e-11	1.51563e-06	0.831	0.162526	(0) E ADR Chromaffin: 1.33357173390636e-95| (2) PN ADR Chromaffin: 1.65357307951052e-49| (3) Endothelial: 1.54338451949123e-177| (4) Macrophage: 2.74864758338687e-172| (5) E NOR Chromaffin: 1.03428670201378e-22| (6) E Glia|SCP: 1.4585963756959e-128| (7) Cortex ZG: 2.28324679335134e-134| (8) Cycling TH+: 4.48833994988198e-68| (9) Cortex X Zone: 1.15818778394103e-117| (10) E Neuroblast: 9.836604300…	(0) E ADR Chromaffin: 5.10331231131284e-91| (2) PN ADR Chromaffin: 6.32789346067085e-45| (3) Endothelial: 5.90622387918903e-173| (4) Macrophage: 1.05185245721049e-167| (5) E NOR Chromaffin: 3.95800835126633e-18| (6) E Glia|SCP: 5.58175661051306e-124| (7) Cortex ZG: 8.73752882879691e-130| (8) Cycling TH+: 1.71759793202084e-63| (9) Cortex X Zone: 4.43215301158552e-113| (10) E Neuroblast: 3.76427173…	(0) E ADR Chromaffin: 1.82171731315341| (2) PN ADR Chromaffin: 1.26818114402559| (3) Endothelial: 6.57779293984091| (4) Macrophage: 8.18962129397816| (5) E NOR Chromaffin: 0.868834326362641| (6) E Glia|SCP: 4.94261286761303| (7) Cortex ZG: 7.51856252648149| (8) Cycling TH+: 2.32033200595745| (9) Cortex X Zone: 7.83328663653914| (10) E Neuroblast: 1.59116085538703| (11) PN Sustentacular: 4.0645547…	(0) E ADR Chromaffin: 0.401| (2) PN ADR Chromaffin: 0.557| (3) Endothelial: 0.03| (4) Macrophage: 0.025| (5) E NOR Chromaffin: 0.575| (6) E Glia|SCP: 0.041| (7) Cortex ZG: 0.01| (8) Cycling TH+: 0.313| (9) Cortex X Zone: 0.026| (10) E Neuroblast: 0.375| (11) PN Sustentacular: 0.071| (12) Cortex ZF: 0.045| (13) Macrophage: 0.029| (14) Cortex ZG: 0.01| (15) Dendritic cell: 0.131| (16) T cell: 0.091…
Snap91	(1) PN NOR Chromaffin	5.31983	1.55235e-19	5.94054e-15	0.99	0.337474	(0) E ADR Chromaffin: 7.73058710292582e-89| (2) PN ADR Chromaffin: 6.98825329930875e-78| (3) Endothelial: 1.68513198706894e-240| (4) Macrophage: 2.61532174675627e-229| (5) E NOR Chromaffin: 2.81979544596813e-18| (6) E Glia|SCP: 9.47386454199764e-184| (7) Cortex ZG: 1.32809072449224e-177| (8) Cycling TH+: 1.12418925742955e-72| (9) Cortex X Zone: 2.53050244201054e-159| (10) E Neuroblast: 3.84873388…	(0) E ADR Chromaffin: 2.95834107254765e-84| (2) PN ADR Chromaffin: 2.67426477257947e-73| (3) Endothelial: 6.4486630881154e-236| (4) Macrophage: 1.00083132604869e-224| (5) E NOR Chromaffin: 1.07907932126309e-13| (6) E Glia|SCP: 3.62545848293166e-179| (7) Cortex ZG: 5.0823375844869e-173| (8) Cycling TH+: 4.3020474503314e-68| (9) Cortex X Zone: 9.68372674508594e-155| (10) E Neuroblast: 1.47283348441…	(0) E ADR Chromaffin: 1.08410160852808| (2) PN ADR Chromaffin: 1.02177451107922| (3) Endothelial: 7.85969956426616| (4) Macrophage: 7.44627423199687| (5) E NOR Chromaffin: 0.594260032397643| (6) E Glia|SCP: 6.78608199727732| (7) Cortex ZG: 6.01281430143579| (8) Cycling TH+: 1.40482891895079| (9) Cortex X Zone: 6.66815451464833| (10) E Neuroblast: 0.911898153988312| (11) PN Sustentacular: 6.394817…	(0) E ADR Chromaffin: 0.971| (2) PN ADR Chromaffin: 0.945| (3) Endothelial: 0.059| (4) Macrophage: 0.045| (5) E NOR Chromaffin: 0.967| (6) E Glia|SCP: 0.095| (7) Cortex ZG: 0.115| (8) Cycling TH+: 0.939| (9) Cortex X Zone: 0.118| (10) E Neuroblast: 0.98| (11) PN Sustentacular: 0.116| (12) Cortex ZF: 0.591| (13) Macrophage: 0.067| (14) Cortex ZG: 0.087| (15) Dendritic cell: 0.091| (16) T cell: 0.0…
RP24-159I10.2	(1) PN NOR Chromaffin	4.21596	5.78639e-17	2.21433e-12	0.872	0.169105	(0) E ADR Chromaffin: 5.81647964834772e-87| (2) PN ADR Chromaffin: 8.76138487477546e-45| (3) Endothelial: 5.02768962149634e-198| (4) Macrophage: 1.84503698160505e-188| (5) E NOR Chromaffin: 3.4795270244301e-36| (6) E Glia|SCP: 7.33925428571205e-138| (7) Cortex ZG: 8.31213153903514e-147| (8) Cycling TH+: 5.81524282802305e-59| (9) Cortex X Zone: 1.03722231143366e-128| (10) E Neuroblast: 4.450303073…	(0) E ADR Chromaffin: 2.22585043182971e-82| (2) PN ADR Chromaffin: 3.35280676387907e-40| (3) Endothelial: 1.92399626435422e-193| (4) Macrophage: 7.06058752120619e-184| (5) E NOR Chromaffin: 1.33154540170891e-31| (6) E Glia|SCP: 2.80858583005629e-133| (7) Cortex ZG: 3.18088649735797e-142| (8) Cycling TH+: 2.22537712542786e-54| (9) Cortex X Zone: 3.96924234139431e-124| (10) E Neuroblast: 1.70304198…	(0) E ADR Chromaffin: 1.48735781260412| (2) PN ADR Chromaffin: 0.983195695244605| (3) Endothelial: 7.0667801009581| (4) Macrophage: 6.92748696914276| (5) E NOR Chromaffin: 1.02288834835253| (6) E Glia|SCP: 4.78238399984259| (7) Cortex ZG: 6.94043635516673| (8) Cycling TH+: 1.72603322885878| (9) Cortex X Zone: 6.33437187223013| (10) E Neuroblast: 0.869307908806862| (11) PN Sustentacular: 5.0627849…	(0) E ADR Chromaffin: 0.572| (2) PN ADR Chromaffin: 0.66| (3) Endothelial: 0.005| (4) Macrophage: 0.005| (5) E NOR Chromaffin: 0.612| (6) E Glia|SCP: 0.097| (7) Cortex ZG: 0.008| (8) Cycling TH+: 0.489| (9) Cortex X Zone: 0.012| (10) E Neuroblast: 0.606| (11) PN Sustentacular: 0.04| (12) Cortex ZF: 0.027| (13) Macrophage: 0.057| (14) Cortex ZG: 0.01| (15) Dendritic cell: 0| (16) T cell: 0| (17) N…
Srpk2	(1) PN NOR Chromaffin	1.86847	5.58588e-18	2.1376e-13	0.995	0.668105	(0) E ADR Chromaffin: 3.97276465978259e-86| (2) PN ADR Chromaffin: 1.96150147096838e-49| (3) Endothelial: 1.81456828512401e-154| (4) Macrophage: 7.5165228866981e-182| (5) E NOR Chromaffin: 9.47554983066043e-19| (6) E Glia|SCP: 4.60120926062937e-86| (7) Cortex ZG: 2.16947653054207e-113| (8) Cycling TH+: 1.13232899925206e-51| (9) Cortex X Zone: 1.15706273663197e-128| (10) E Neuroblast: 9.7387184571…	(0) E ADR Chromaffin: 1.5202975800056e-81| (2) PN ADR Chromaffin: 7.50627382910179e-45| (3) Endothelial: 6.94398991351256e-150| (4) Macrophage: 2.87642297828163e-177| (5) E NOR Chromaffin: 3.62610340919713e-14| (6) E Glia|SCP: 1.76079075985765e-81| (7) Cortex ZG: 8.30215278707839e-109| (8) Cycling TH+: 4.33319661433778e-47| (9) Cortex X Zone: 4.42784768054321e-124| (10) E Neuroblast: 3.7268127791…	(0) E ADR Chromaffin: 0.974357429002144| (2) PN ADR Chromaffin: 0.718961146995857| (3) Endothelial: 2.25924080370062| (4) Macrophage: 3.05106364212005| (5) E NOR Chromaffin: 0.504998249902655| (6) E Glia|SCP: 1.51014470758412| (7) Cortex ZG: 2.02409311471524| (8) Cycling TH+: 1.03085337845976| (9) Cortex X Zone: 2.69922860415057| (10) E Neuroblast: 1.21542055482398| (11) PN Sustentacular: 1.75977…	(0) E ADR Chromaffin: 0.962| (2) PN ADR Chromaffin: 0.941| (3) Endothelial: 0.456| (4) Macrophage: 0.425| (5) E NOR Chromaffin: 0.972| (6) E Glia|SCP: 0.767| (7) Cortex ZG: 0.684| (8) Cycling TH+: 0.93| (9) Cortex X Zone: 0.685| (10) E Neuroblast: 0.924| (11) PN Sustentacular: 0.607| (12) Cortex ZF: 0.773| (13) Macrophage: 0.552| (14) Cortex ZG: 0.641| (15) Dendritic cell: 0.374| (16) T cell: 0.4…
Sspo	(1) PN NOR Chromaffin	4.19916	3.75842e-11	1.43827e-06	0.674	0.107368	(0) E ADR Chromaffin: 6.24920707515844e-83| (2) PN ADR Chromaffin: 3.33344923742614e-18| (3) Endothelial: 1.81249967640574e-113| (4) Macrophage: 4.95597454020014e-121| (5) E NOR Chromaffin: 6.47125034156328e-63| (6) E Glia|SCP: 7.54708353576593e-94| (7) Cortex ZG: 5.29590321760326e-95| (8) Cycling TH+: 1.5914443722781e-60| (9) Cortex X Zone: 2.12155778375988e-76| (10) E Neuroblast: 5.402894482355…	(0) E ADR Chromaffin: 2.39144656352163e-78| (2) PN ADR Chromaffin: 1.27564435417823e-13| (3) Endothelial: 6.93607376166948e-109| (4) Macrophage: 1.89655233704379e-116| (5) E NOR Chromaffin: 2.47641808070944e-58| (6) E Glia|SCP: 2.8881179274669e-89| (7) Cortex ZG: 2.02663624331242e-90| (8) Cycling TH+: 6.09013932383384e-56| (9) Cortex X Zone: 8.11877732689229e-72| (10) E Neuroblast: 2.067579660507…	(0) E ADR Chromaffin: 2.19638888441438| (2) PN ADR Chromaffin: 0.967857177370111| (3) Endothelial: 4.19318562579944| (4) Macrophage: 6.47119846005057| (5) E NOR Chromaffin: 2.38963269533882| (6) E Glia|SCP: 5.83100867782385| (7) Cortex ZG: 6.40231167187195| (8) Cycling TH+: 3.21712127704702| (9) Cortex X Zone: 5.44048701648819| (10) E Neuroblast: 1.7259519968137| (11) PN Sustentacular: 3.77611636…	(0) E ADR Chromaffin: 0.252| (2) PN ADR Chromaffin: 0.502| (3) Endothelial: 0.067| (4) Macrophage: 0.031| (5) E NOR Chromaffin: 0.193| (6) E Glia|SCP: 0.032| (7) Cortex ZG: 0.013| (8) Cycling TH+: 0.168| (9) Cortex X Zone: 0.062| (10) E Neuroblast: 0.323| (11) PN Sustentacular: 0.085| (12) Cortex ZF: 0.009| (13) Macrophage: 0.029| (14) Cortex ZG: 0.039| (15) Dendritic cell: 0.04| (16) T cell: 0.0…
Eml6	(1) PN NOR Chromaffin	3.27144	1.96879e-09	7.53416e-05	0.79	0.213895	(0) E ADR Chromaffin: 1.58625053672558e-82| (2) PN ADR Chromaffin: 1.30047648752022e-61| (3) Endothelial: 3.6345233315256e-126| (4) Macrophage: 2.54114348928698e-121| (5) E NOR Chromaffin: 1.43643051752668e-41| (6) E Glia|SCP: 1.40391335018123e-108| (7) Cortex ZG: 3.65905130983208e-108| (8) Cycling TH+: 8.72675639334794e-52| (9) Cortex X Zone: 5.05343426450301e-100| (10) E Neuroblast: 6.663584522…	(0) E ADR Chromaffin: 6.07026355394147e-78| (2) PN ADR Chromaffin: 4.97666342244238e-57| (3) Endothelial: 1.39085938850822e-121| (4) Macrophage: 9.7244479048034e-117| (5) E NOR Chromaffin: 5.49693230447111e-37| (6) E Glia|SCP: 5.37249560847354e-104| (7) Cortex ZG: 1.40024575524654e-103| (8) Cycling TH+: 3.33955513660639e-47| (9) Cortex X Zone: 1.93384822434001e-95| (10) E Neuroblast: 2.5500205252…	(0) E ADR Chromaffin: 1.89424136140493| (2) PN ADR Chromaffin: 1.53872817818072| (3) Endothelial: 3.01447917223757| (4) Macrophage: 3.36227632153746| (5) E NOR Chromaffin: 1.62669339203921| (6) E Glia|SCP: 4.59256873690219| (7) Cortex ZG: 4.38647366205389| (8) Cycling TH+: 2.24118975562277| (9) Cortex X Zone: 5.75180458499748| (10) E Neuroblast: 1.4567424032529| (11) PN Sustentacular: 2.944636106…	(0) E ADR Chromaffin: 0.423| (2) PN ADR Chromaffin: 0.451| (3) Endothelial: 0.12| (4) Macrophage: 0.144| (5) E NOR Chromaffin: 0.476| (6) E Glia|SCP: 0.104| (7) Cortex ZG: 0.073| (8) Cycling TH+: 0.385| (9) Cortex X Zone: 0.082| (10) E Neuroblast: 0.45| (11) PN Sustentacular: 0.147| (12) Cortex ZF: 0.209| (13) Macrophage: 0.248| (14) Cortex ZG: 0.126| (15) Dendritic cell: 0.111| (16) T cell: 0.05…
Kcnip4	(1) PN NOR Chromaffin	4.06776	9.04205e-10	3.46021e-05	0.591	0.0889474	(0) E ADR Chromaffin: 6.80971117240216e-78| (2) PN ADR Chromaffin: 1.99848207120911e-50| (3) Endothelial: 3.04581742772559e-103| (4) Macrophage: 7.54893390074757e-100| (5) E NOR Chromaffin: 1.13972171624554e-45| (6) E Glia|SCP: 3.52117493987616e-74| (7) Cortex ZG: 1.35092969525641e-71| (8) Cycling TH+: 2.18990463930547e-27| (9) Cortex X Zone: 2.06677940961443e-53| (10) E Neuroblast: 1.43038879729…	(0) E ADR Chromaffin: 2.60594027145486e-73| (2) PN ADR Chromaffin: 7.64779119010302e-46| (3) Endothelial: 1.16557341324203e-98| (4) Macrophage: 2.88882602513808e-95| (5) E NOR Chromaffin: 4.36148706372843e-41| (6) E Glia|SCP: 1.34748322599181e-69| (7) Cortex ZG: 5.16973775780723e-67| (8) Cycling TH+: 8.38032707369416e-23| (9) Cortex X Zone: 7.90915144471252e-49| (10) E Neuroblast: 5.4738118494843…	(0) E ADR Chromaffin: 2.68794597019984| (2) PN ADR Chromaffin: 1.79775557772507| (3) Endothelial: 5.36548415062255| (4) Macrophage: 7.11840375114998| (5) E NOR Chromaffin: 2.44025259399339| (6) E Glia|SCP: 5.13225156399335| (7) Cortex ZG: 5.1636019524005| (8) Cycling TH+: 2.01890529571041| (9) Cortex X Zone: 4.15434671841089| (10) E Neuroblast: 4.39821963519142| (11) PN Sustentacular: 4.458524952…	(0) E ADR Chromaffin: 0.205| (2) PN ADR Chromaffin: 0.255| (3) Endothelial: 0.03| (4) Macrophage: 0.029| (5) E NOR Chromaffin: 0.207| (6) E Glia|SCP: 0.039| (7) Cortex ZG: 0.043| (8) Cycling TH+: 0.278| (9) Cortex X Zone: 0.106| (10) E Neuroblast: 0.068| (11) PN Sustentacular: 0.036| (12) Cortex ZF: 0.045| (13) Macrophage: 0.076| (14) Cortex ZG: 0.068| (15) Dendritic cell: 0.02| (16) T cell: 0.02…
Gper1	(1) PN NOR Chromaffin	5.19597	8.19133e-14	3.13466e-09	0.764	0.116158	(0) E ADR Chromaffin: 2.52421757807365e-77| (2) PN ADR Chromaffin: 4.55486937060172e-48| (3) Endothelial: 9.39636562559406e-159| (4) Macrophage: 2.73438252054971e-152| (5) E NOR Chromaffin: 2.41672325657722e-68| (6) E Glia|SCP: 1.66757418961199e-118| (7) Cortex ZG: 2.5753361283847e-109| (8) Cycling TH+: 2.32818404175084e-51| (9) Cortex X Zone: 1.92110123087362e-83| (10) E Neuroblast: 2.4240246653…	(0) E ADR Chromaffin: 9.65967582777223e-73| (2) PN ADR Chromaffin: 1.74305741074186e-43| (3) Endothelial: 3.59580119760233e-154| (4) Macrophage: 1.04639350296396e-147| (5) E NOR Chromaffin: 9.2483165582697e-64| (6) E Glia|SCP: 6.38147290880716e-114| (7) Cortex ZG: 9.85529629610257e-105| (8) Cycling TH+: 8.9094946909721e-47| (9) Cortex X Zone: 7.35167019030718e-79| (10) E Neuroblast: 9.27625758926…	(0) E ADR Chromaffin: 1.7003524346145| (2) PN ADR Chromaffin: 1.30938795886759| (3) Endothelial: 6.3145826076806| (4) Macrophage: 9.22570560967594| (5) E NOR Chromaffin: 2.09299897035179| (6) E Glia|SCP: 8.05562535407559| (7) Cortex ZG: 5.37160896160336| (8) Cycling TH+: 2.04119435139155| (9) Cortex X Zone: 3.84157802555742| (10) E Neuroblast: 3.57242344447371| (11) PN Sustentacular: 5.6390760910…	(0) E ADR Chromaffin: 0.399| (2) PN ADR Chromaffin: 0.487| (3) Endothelial: 0.013| (4) Macrophage: 0.014| (5) E NOR Chromaffin: 0.283| (6) E Glia|SCP: 0.027| (7) Cortex ZG: 0.05| (8) Cycling TH+: 0.332| (9) Cortex X Zone: 0.126| (10) E Neuroblast: 0.12| (11) PN Sustentacular: 0.049| (12) Cortex ZF: 0.118| (13) Macrophage: 0.038| (14) Cortex ZG: 0.058| (15) Dendritic cell: 0.01| (16) T cell: 0.068…
Npy2r	(1) PN NOR Chromaffin	5.633	6.6864e-12	2.55875e-07	0.7	0.116526	(0) E ADR Chromaffin: 3.19375773411591e-70| (2) PN ADR Chromaffin: 3.35566805938852e-21| (3) Endothelial: 2.65869354952718e-137| (4) Macrophage: 3.31572738104594e-129| (5) E NOR Chromaffin: 6.99839885446254e-76| (6) E Glia|SCP: 1.36756638888306e-103| (7) Cortex ZG: 8.46477430253098e-49| (8) Cycling TH+: 7.78691369006399e-57| (9) Cortex X Zone: 1.16094214561463e-88| (10) E Neuroblast: 1.5663131031…	(0) E ADR Chromaffin: 1.22218720969148e-65| (2) PN ADR Chromaffin: 1.2841470529668e-16| (3) Endothelial: 1.01742884753306e-132| (4) Macrophage: 1.26886255417866e-124| (5) E NOR Chromaffin: 2.67814727362572e-71| (6) E Glia|SCP: 5.23340305697769e-99| (7) Cortex ZG: 3.23929983009256e-44| (8) Cycling TH+: 2.97989613091369e-52| (9) Cortex X Zone: 4.44269340283808e-84| (10) E Neuroblast: 5.993966983299…	(0) E ADR Chromaffin: 2.24528294277242| (2) PN ADR Chromaffin: 1.19053216176516| (3) Endothelial: 8.09666212751383| (4) Macrophage: 8.89941554514589| (5) E NOR Chromaffin: 3.13996978061165| (6) E Glia|SCP: 7.66900118929965| (7) Cortex ZG: 2.31794850863409| (8) Cycling TH+: 3.08697911422029| (9) Cortex X Zone: 8.87607598521009| (10) E Neuroblast: 4.13971134275293| (11) PN Sustentacular: 8.01046209…	(0) E ADR Chromaffin: 0.356| (2) PN ADR Chromaffin: 0.52| (3) Endothelial: 0.025| (4) Macrophage: 0.036| (5) E NOR Chromaffin: 0.181| (6) E Glia|SCP: 0.017| (7) Cortex ZG: 0.256| (8) Cycling TH+: 0.233| (9) Cortex X Zone: 0.024| (10) E Neuroblast: 0.104| (11) PN Sustentacular: 0.022| (12) Cortex ZF: 0.073| (13) Macrophage: 0.019| (14) Cortex ZG: 0.184| (15) Dendritic cell: 0.01| (16) T cell: 0.02…
Mtcl1	(1) PN NOR Chromaffin	4.06312	6.23293e-17	2.38522e-12	0.893	0.248684	(0) E ADR Chromaffin: 4.23967948803766e-69| (2) PN ADR Chromaffin: 2.24378162954753e-40| (3) Endothelial: 4.3999212525699e-174| (4) Macrophage: 1.95529258444121e-185| (5) E NOR Chromaffin: 5.96168985741068e-20| (6) E Glia|SCP: 1.16210604572179e-122| (7) Cortex ZG: 4.15569126996045e-137| (8) Cycling TH+: 6.52692797467692e-46| (9) Cortex X Zone: 5.65258043617068e-113| (10) E Neuroblast: 2.415419299…	(0) E ADR Chromaffin: 1.62244054648225e-64| (2) PN ADR Chromaffin: 8.58650353995247e-36| (3) Endothelial: 1.68376186493345e-169| (4) Macrophage: 7.48251366213963e-181| (5) E NOR Chromaffin: 2.28141947463392e-15| (6) E Glia|SCP: 4.44714741576815e-118| (7) Cortex ZG: 1.59029993518846e-132| (8) Cycling TH+: 2.49772479734936e-41| (9) Cortex X Zone: 2.1631294813138e-108| (10) E Neuroblast: 9.243326574…	(0) E ADR Chromaffin: 1.3178240799322| (2) PN ADR Chromaffin: 0.970473187380658| (3) Endothelial: 4.57567600458186| (4) Macrophage: 7.67846612879511| (5) E NOR Chromaffin: 0.74226828674592| (6) E Glia|SCP: 3.55997400300071| (7) Cortex ZG: 4.83989819255597| (8) Cycling TH+: 1.52234523213719| (9) Cortex X Zone: 4.12059783336393| (10) E Neuroblast: 1.92955698082673| (11) PN Sustentacular: 3.47022659…	(0) E ADR Chromaffin: 0.625| (2) PN ADR Chromaffin: 0.703| (3) Endothelial: 0.168| (4) Macrophage: 0.115| (5) E NOR Chromaffin: 0.758| (6) E Glia|SCP: 0.177| (7) Cortex ZG: 0.095| (8) Cycling TH+: 0.604| (9) Cortex X Zone: 0.156| (10) E Neuroblast: 0.47| (11) PN Sustentacular: 0.192| (12) Cortex ZF: 0.082| (13) Macrophage: 0.048| (14) Cortex ZG: 0.117| (15) Dendritic cell: 0.061| (16) T cell: 0.0…
Atp2b2	(1) PN NOR Chromaffin	4.75636	3.43256e-16	1.31357e-11	0.871	0.209	(0) E ADR Chromaffin: 3.8513105460314e-68| (2) PN ADR Chromaffin: 1.81637776164733e-19| (3) Endothelial: 5.24841864060872e-181| (4) Macrophage: 2.25646909461598e-180| (5) E NOR Chromaffin: 1.20003984439949e-44| (6) E Glia|SCP: 4.13072263368169e-147| (7) Cortex ZG: 1.08956692540995e-144| (8) Cycling TH+: 4.78935806739283e-35| (9) Cortex X Zone: 4.05944800960543e-125| (10) E Neuroblast: 5.066568109…	(0) E ADR Chromaffin: 1.4738195197553e-63| (2) PN ADR Chromaffin: 6.950914418272e-15| (3) Endothelial: 2.00846484538815e-176| (4) Macrophage: 8.63505593127645e-176| (5) E NOR Chromaffin: 4.59231247654795e-40| (6) E Glia|SCP: 1.58074493745731e-142| (7) Cortex ZG: 4.1695547101588e-140| (8) Cycling TH+: 1.83279154522989e-30| (9) Cortex X Zone: 1.55346956431581e-120| (10) E Neuroblast: 1.938874284225…	(0) E ADR Chromaffin: 1.48938421785305| (2) PN ADR Chromaffin: 0.702271370162847| (3) Endothelial: 4.75716524707163| (4) Macrophage: 6.63982729892237| (5) E NOR Chromaffin: 1.38753171387703| (6) E Glia|SCP: 7.22011561610914| (7) Cortex ZG: 8.23583864396949| (8) Cycling TH+: 1.40816883943864| (9) Cortex X Zone: 7.10061395747897| (10) E Neuroblast: 1.48839295251496| (11) PN Sustentacular: 5.4986751…	(0) E ADR Chromaffin: 0.602| (2) PN ADR Chromaffin: 0.725| (3) Endothelial: 0.057| (4) Macrophage: 0.052| (5) E NOR Chromaffin: 0.545| (6) E Glia|SCP: 0.027| (7) Cortex ZG: 0.028| (8) Cycling TH+: 0.623| (9) Cortex X Zone: 0.059| (10) E Neuroblast: 0.534| (11) PN Sustentacular: 0.058| (12) Cortex ZF: 0.273| (13) Macrophage: 0.095| (14) Cortex ZG: 0.087| (15) Dendritic cell: 0.051| (16) T cell: 0.…
RP23-146D13.2	(1) PN NOR Chromaffin	3.67951	1.47809e-09	5.65637e-05	0.579	0.0930526	(0) E ADR Chromaffin: 1.87342789755238e-64| (2) PN ADR Chromaffin: 1.31419477769711e-42| (3) Endothelial: 2.16350872557939e-102| (4) Macrophage: 3.69968589621562e-96| (5) E NOR Chromaffin: 7.50084219534768e-17| (6) E Glia|SCP: 7.96516249996478e-70| (7) Cortex ZG: 9.22298798091902e-77| (8) Cycling TH+: 3.02935575276348e-18| (9) Cortex X Zone: 1.56330504450612e-64| (10) E Neuroblast: 3.877189622777…	(0) E ADR Chromaffin: 7.16923387835347e-60| (2) PN ADR Chromaffin: 5.02916057529129e-38| (3) Endothelial: 8.27931519104722e-98| (4) Macrophage: 1.4157957987638e-91| (5) E NOR Chromaffin: 2.87042229131565e-12| (6) E Glia|SCP: 3.04810838548652e-65| (7) Cortex ZG: 3.52945304053809e-72| (8) Cycling TH+: 1.15927385946753e-13| (9) Cortex X Zone: 5.98245574431604e-60| (10) E Neuroblast: 1.48372292484456…	(0) E ADR Chromaffin: 2.12063911685908| (2) PN ADR Chromaffin: 1.321675230108| (3) Endothelial: 5.78294469493823| (4) Macrophage: 5.22202386879428| (5) E NOR Chromaffin: 1.1544424506192| (6) E Glia|SCP: 3.85249428723645| (7) Cortex ZG: 6.66795314443185| (8) Cycling TH+: 1.22656872722899| (9) Cortex X Zone: 5.94801968030472| (10) E Neuroblast: 2.63002908358515| (11) PN Sustentacular: 1.84605737168…	(0) E ADR Chromaffin: 0.221| (2) PN ADR Chromaffin: 0.254| (3) Endothelial: 0.022| (4) Macrophage: 0.027| (5) E NOR Chromaffin: 0.364| (6) E Glia|SCP: 0.041| (7) Cortex ZG: 0.01| (8) Cycling TH+: 0.326| (9) Cortex X Zone: 0.026| (10) E Neuroblast: 0.139| (11) PN Sustentacular: 0.112| (12) Cortex ZF: 0.036| (13) Macrophage: 0.057| (14) Cortex ZG: 0.039| (15) Dendritic cell: 0.04| (16) T cell: 0.01…
Ryr2	(1) PN NOR Chromaffin	5.05624	8.33762e-20	3.19064e-15	0.959	0.279895	(0) E ADR Chromaffin: 1.29185996932239e-62| (2) PN ADR Chromaffin: 2.57943091531692e-27| (3) Endothelial: 2.0735289779882e-215| (4) Macrophage: 1.05042912278204e-216| (5) E NOR Chromaffin: 2.79538854074159e-58| (6) E Glia|SCP: 2.45188795655283e-171| (7) Cortex ZG: 9.8938947713748e-171| (8) Cycling TH+: 1.72017180864545e-82| (9) Cortex X Zone: 9.81320666160253e-149| (10) E Neuroblast: 6.2205871223…	(0) E ADR Chromaffin: 4.94368973060291e-58| (2) PN ADR Chromaffin: 9.8709662267348e-23| (3) Endothelial: 7.93498069296525e-211| (4) Macrophage: 4.01978216706231e-212| (5) E NOR Chromaffin: 1.06973928677099e-53| (6) E Glia|SCP: 9.38288483213636e-167| (7) Cortex ZG: 3.78619565110971e-166| (8) Cycling TH+: 6.58275347732441e-78| (9) Cortex X Zone: 3.75531792526206e-144| (10) E Neuroblast: 2.380494279…	(0) E ADR Chromaffin: 1.15203917695787| (2) PN ADR Chromaffin: 0.736248018181448| (3) Endothelial: 5.72822592367826| (4) Macrophage: 8.03633427497524| (5) E NOR Chromaffin: 1.37269989890212| (6) E Glia|SCP: 6.7625009394872| (7) Cortex ZG: 7.73378411100491| (8) Cycling TH+: 2.16547804197584| (9) Cortex X Zone: 7.04696128531622| (10) E Neuroblast: 1.17303666870868| (11) PN Sustentacular: 6.21697927…	(0) E ADR Chromaffin: 0.887| (2) PN ADR Chromaffin: 0.901| (3) Endothelial: 0.118| (4) Macrophage: 0.054| (5) E NOR Chromaffin: 0.744| (6) E Glia|SCP: 0.075| (7) Cortex ZG: 0.025| (8) Cycling TH+: 0.626| (9) Cortex X Zone: 0.091| (10) E Neuroblast: 0.801| (11) PN Sustentacular: 0.161| (12) Cortex ZF: 0.091| (13) Macrophage: 0.229| (14) Cortex ZG: 0.146| (15) Dendritic cell: 0.111| (16) T cell: 0.…
Hpca	(1) PN NOR Chromaffin	5.15553	3.9519e-10	1.51231e-05	0.608	0.0719474	(0) E ADR Chromaffin: 3.23985986183195e-62| (2) PN ADR Chromaffin: 1.32049243301722e-70| (3) Endothelial: 9.88470176363382e-112| (4) Macrophage: 1.93767461604277e-104| (5) E NOR Chromaffin: 5.45353067822674e-28| (6) E Glia|SCP: 2.03261366279403e-80| (7) Cortex ZG: 3.25613910596591e-83| (8) Cycling TH+: 5.65027265003028e-36| (9) Cortex X Zone: 3.1237019595133e-72| (10) E Neuroblast: 9.809447119254…	(0) E ADR Chromaffin: 1.23982957192585e-57| (2) PN ADR Chromaffin: 5.05326044267031e-66| (3) Endothelial: 3.78267767090739e-107| (4) Macrophage: 7.41509322067248e-100| (5) E NOR Chromaffin: 2.08695711994381e-23| (6) E Glia|SCP: 7.77840596478018e-76| (7) Cortex ZG: 1.24605931307103e-78| (8) Cycling TH+: 2.16224633771359e-31| (9) Cortex X Zone: 1.19537826586655e-67| (10) E Neuroblast: 3.75387922359…	(0) E ADR Chromaffin: 2.13200601398743| (2) PN ADR Chromaffin: 2.43845084864758| (3) Endothelial: 6.99423533617587| (4) Macrophage: 7.47895042347268| (5) E NOR Chromaffin: 1.52888625010304| (6) E Glia|SCP: 4.98105021607805| (7) Cortex ZG: 8.2441192229204| (8) Cycling TH+: 2.13320748697311| (9) Cortex X Zone: 7.06131872818519| (10) E Neuroblast: 2.05255367795391| (11) PN Sustentacular: 7.073034563…	(0) E ADR Chromaffin: 0.262| (2) PN ADR Chromaffin: 0.211| (3) Endothelial: 0.02| (4) Macrophage: 0.031| (5) E NOR Chromaffin: 0.299| (6) E Glia|SCP: 0.024| (7) Cortex ZG: 0.008| (8) Cycling TH+: 0.233| (9) Cortex X Zone: 0.009| (10) E Neuroblast: 0.195| (11) PN Sustentacular: 0.009| (12) Cortex ZF: 0.027| (13) Macrophage: 0.029| (14) Cortex ZG: 0| (15) Dendritic cell: 0.01| (16) T cell: 0| (17) …
Rab40b	(1) PN NOR Chromaffin	3.75937	4.43733e-10	1.69808e-05	0.621	0.113	(0) E ADR Chromaffin: 1.48913169395309e-57| (2) PN ADR Chromaffin: 1.51111234607787e-48| (3) Endothelial: 8.02211542625114e-102| (4) Macrophage: 2.0143800424078e-110| (5) E NOR Chromaffin: 4.49158750364274e-30| (6) E Glia|SCP: 6.15677744381293e-80| (7) Cortex ZG: 3.0065626929888e-65| (8) Cycling TH+: 2.12912988718034e-53| (9) Cortex X Zone: 1.10107118743253e-48| (10) E Neuroblast: 2.8366141000031…	(0) E ADR Chromaffin: 5.69860916641967e-53| (2) PN ADR Chromaffin: 5.7827247259708e-44| (3) Endothelial: 3.06990313131778e-97| (4) Macrophage: 7.70862954628616e-106| (5) E NOR Chromaffin: 1.718840705894e-25| (6) E Glia|SCP: 2.35607559219833e-75| (7) Cortex ZG: 1.15055141135295e-60| (8) Cycling TH+: 8.14775425226172e-49| (9) Cortex X Zone: 4.21357922006679e-44| (10) E Neuroblast: 1.08551548378922e…	(0) E ADR Chromaffin: 1.95667188244081| (2) PN ADR Chromaffin: 1.68023267632397| (3) Endothelial: 4.13380283562678| (4) Macrophage: 8.03131558462391| (5) E NOR Chromaffin: 1.68809117747844| (6) E Glia|SCP: 4.84156395104161| (7) Cortex ZG: 3.24487628472755| (8) Cycling TH+: 3.05107260694574| (9) Cortex X Zone: 3.16876646069618| (10) E Neuroblast: 2.17669983186302| (11) PN Sustentacular: 3.80273502…	(0) E ADR Chromaffin: 0.298| (2) PN ADR Chromaffin: 0.298| (3) Endothelial: 0.066| (4) Macrophage: 0.02| (5) E NOR Chromaffin: 0.331| (6) E Glia|SCP: 0.039| (7) Cortex ZG: 0.088| (8) Cycling TH+: 0.155| (9) Cortex X Zone: 0.165| (10) E Neuroblast: 0.199| (11) PN Sustentacular: 0.062| (12) Cortex ZF: 0.127| (13) Macrophage: 0.029| (14) Cortex ZG: 0.068| (15) Dendritic cell: 0.02| (16) T cell: 0.04…
Slc26a4	(1) PN NOR Chromaffin	5.28839	1.80778e-15	6.918e-11	0.84	0.177632	(0) E ADR Chromaffin: 2.05779145775873e-56| (2) PN ADR Chromaffin: 3.57844741182673e-33| (3) Endothelial: 4.83816088138441e-183| (4) Macrophage: 1.42113312156333e-173| (5) E NOR Chromaffin: 6.43830993109687e-35| (6) E Glia|SCP: 1.76704317328362e-138| (7) Cortex ZG: 1.95394466958217e-137| (8) Cycling TH+: 5.42860138237569e-46| (9) Cortex X Zone: 1.68011568314391e-119| (10) E Neuroblast: 3.05757118…	(0) E ADR Chromaffin: 7.87475635055112e-52| (2) PN ADR Chromaffin: 1.36940025555785e-28| (3) Endothelial: 1.85146740608818e-178| (4) Macrophage: 5.43839222959853e-169| (5) E NOR Chromaffin: 2.46381244443215e-30| (6) E Glia|SCP: 6.76212081552177e-134| (7) Cortex ZG: 7.47735546155707e-133| (8) Cycling TH+: 2.07741717700753e-41| (9) Cortex X Zone: 6.42946669625512e-115| (10) E Neuroblast: 1.17007134…	(0) E ADR Chromaffin: 1.38751131537724| (2) PN ADR Chromaffin: 0.894613525815818| (3) Endothelial: 7.14341739301131| (4) Macrophage: 6.19233099886206| (5) E NOR Chromaffin: 1.24908977641213| (6) E Glia|SCP: 7.26758702372671| (7) Cortex ZG: 8.8017935015487| (8) Cycling TH+: 1.79027965644672| (9) Cortex X Zone: 7.70937945931173| (10) E Neuroblast: 2.14982763174147| (11) PN Sustentacular: 7.31666154…	(0) E ADR Chromaffin: 0.646| (2) PN ADR Chromaffin: 0.652| (3) Endothelial: 0.022| (4) Macrophage: 0.027| (5) E NOR Chromaffin: 0.608| (6) E Glia|SCP: 0.024| (7) Cortex ZG: 0.01| (8) Cycling TH+: 0.58| (9) Cortex X Zone: 0.026| (10) E Neuroblast: 0.462| (11) PN Sustentacular: 0.045| (12) Cortex ZF: 0.045| (13) Macrophage: 0.029| (14) Cortex ZG: 0.049| (15) Dendritic cell: 0| (16) T cell: 0.045| (…
Jph3	(1) PN NOR Chromaffin	4.24119	5.13306e-09	0.000196432	0.73	0.167421	(0) E ADR Chromaffin: 4.48282932220675e-45| (2) PN ADR Chromaffin: 7.11669848439479e-45| (3) Endothelial: 7.37334426606931e-140| (4) Macrophage: 1.6555173977211e-132| (5) E NOR Chromaffin: 3.70672924774868e-14| (6) E Glia|SCP: 7.16564315592363e-104| (7) Cortex ZG: 1.0191668554847e-104| (8) Cycling TH+: 6.30089071203239e-36| (9) Cortex X Zone: 3.92478400977824e-89| (10) E Neuroblast: 9.69956737049…	(0) E ADR Chromaffin: 1.71548912502208e-40| (2) PN ADR Chromaffin: 2.7234181760082e-40| (3) Endothelial: 2.8216313837394e-135| (4) Macrophage: 6.33533397759909e-128| (5) E NOR Chromaffin: 1.41849114852847e-09| (6) E Glia|SCP: 2.74214832290886e-99| (7) Cortex ZG: 3.90014772256887e-100| (8) Cycling TH+: 2.41122485768055e-31| (9) Cortex X Zone: 1.50193634486194e-84| (10) E Neuroblast: 0.003711830441…	(0) E ADR Chromaffin: 1.25772976104105| (2) PN ADR Chromaffin: 1.234122801393| (3) Endothelial: 6.6403921082342| (4) Macrophage: 5.440669583049| (5) E NOR Chromaffin: 0.699352646287327| (6) E Glia|SCP: 5.7633661688447| (7) Cortex ZG: 6.34468740092068| (8) Cycling TH+: 1.60278037060087| (9) Cortex X Zone: 6.34255886054026| (10) E Neuroblast: 0.600004049663631| (11) PN Sustentacular: 5.307201994504…	(0) E ADR Chromaffin: 0.437| (2) PN ADR Chromaffin: 0.421| (3) Endothelial: 0.057| (4) Macrophage: 0.047| (5) E NOR Chromaffin: 0.51| (6) E Glia|SCP: 0.061| (7) Cortex ZG: 0.038| (8) Cycling TH+: 0.369| (9) Cortex X Zone: 0.074| (10) E Neuroblast: 0.546| (11) PN Sustentacular: 0.058| (12) Cortex ZF: 0.027| (13) Macrophage: 0.133| (14) Cortex ZG: 0.078| (15) Dendritic cell: 0.04| (16) T cell: 0.05…
Tppp3	(1) PN NOR Chromaffin	4.83455	4.2674e-21	1.63305e-16	0.995	0.411895	(0) E ADR Chromaffin: 5.41549267733563e-45| (2) PN ADR Chromaffin: 3.35830655118948e-55| (3) Endothelial: 4.20765395115117e-240| (4) Macrophage: 1.00313833456963e-229| (5) E NOR Chromaffin: 4.3033453128526e-91| (6) E Glia|SCP: 3.94188055475465e-150| (7) Cortex ZG: 1.34479094831123e-182| (8) Cycling TH+: 1.32259800577085e-45| (9) Cortex X Zone: 2.17275382580775e-161| (10) E Neuroblast: 5.729488509…	(0) E ADR Chromaffin: 2.0724007377628e-40| (2) PN ADR Chromaffin: 1.28515675100919e-50| (3) Endothelial: 1.61018501402653e-235| (4) Macrophage: 3.83880977873105e-225| (5) E NOR Chromaffin: 1.64680418432243e-86| (6) E Glia|SCP: 1.50847885069351e-145| (7) Cortex ZG: 5.14624600099741e-178| (8) Cycling TH+: 5.06131804848387e-41| (9) Cortex X Zone: 8.31469434060111e-157| (10) E Neuroblast: 2.192560662…	(0) E ADR Chromaffin: 0.752299825300489| (2) PN ADR Chromaffin: 0.872526503345375| (3) Endothelial: 7.34371355737214| (4) Macrophage: 7.29238569753646| (5) E NOR Chromaffin: 1.47572790966638| (6) E Glia|SCP: 3.04269760053769| (7) Cortex ZG: 7.78344309769632| (8) Cycling TH+: 1.02825885427359| (9) Cortex X Zone: 7.41138528796666| (10) E Neuroblast: 0.818269488636983| (11) PN Sustentacular: 1.67130…	(0) E ADR Chromaffin: 0.974| (2) PN ADR Chromaffin: 0.973| (3) Endothelial: 0.116| (4) Macrophage: 0.124| (5) E NOR Chromaffin: 0.872| (6) E Glia|SCP: 0.558| (7) Cortex ZG: 0.073| (8) Cycling TH+: 0.909| (9) Cortex X Zone: 0.171| (10) E Neuroblast: 0.904| (11) PN Sustentacular: 0.79| (12) Cortex ZF: 0.091| (13) Macrophage: 0.219| (14) Cortex ZG: 0.214| (15) Dendritic cell: 0.242| (16) T cell: 0.1…
Stac	(1) PN NOR Chromaffin	5.03999	1.12464e-14	4.30376e-10	0.832	0.187368	(0) E ADR Chromaffin: 2.08982045184969e-44| (2) PN ADR Chromaffin: 3.42584597934971e-22| (3) Endothelial: 1.88136978202664e-180| (4) Macrophage: 6.41422968240236e-171| (5) E NOR Chromaffin: 1.95410473036364e-13| (6) E Glia|SCP: 3.33317401067161e-133| (7) Cortex ZG: 2.05348944344772e-133| (8) Cycling TH+: 8.43141998853402e-39| (9) Cortex X Zone: 1.04437690929477e-117| (10) E Neuroblast: 1.05006761…	(0) E ADR Chromaffin: 7.99732490513839e-40| (2) PN ADR Chromaffin: 1.31100273937755e-17| (3) Endothelial: 7.19962588185956e-176| (4) Macrophage: 2.45459741486174e-166| (5) E NOR Chromaffin: 7.47796798215559e-09| (6) E Glia|SCP: 1.27553903040381e-128| (7) Cortex ZG: 7.85829340218574e-129| (8) Cycling TH+: 3.2265358012122e-34| (9) Cortex X Zone: 3.99662155648922e-113| (10) E Neuroblast: 4.018398746…	(0) E ADR Chromaffin: 1.08637721029251| (2) PN ADR Chromaffin: 0.783845634759463| (3) Endothelial: 7.66390217403929| (4) Macrophage: 7.02153682977971| (5) E NOR Chromaffin: 0.573504374829364| (6) E Glia|SCP: 5.69229413279755| (7) Cortex ZG: 7.27851897152997| (8) Cycling TH+: 1.48885207951234| (9) Cortex X Zone: 8.54753533438087| (10) E Neuroblast: 1.26263882498202| (11) PN Sustentacular: 7.185978…	(0) E ADR Chromaffin: 0.627| (2) PN ADR Chromaffin: 0.735| (3) Endothelial: 0.025| (4) Macrophage: 0.027| (5) E NOR Chromaffin: 0.689| (6) E Glia|SCP: 0.029| (7) Cortex ZG: 0.02| (8) Cycling TH+: 0.57| (9) Cortex X Zone: 0.035| (10) E Neuroblast: 0.502| (11) PN Sustentacular: 0.027| (12) Cortex ZF: 0.036| (13) Macrophage: 0.048| (14) Cortex ZG: 0.058| (15) Dendritic cell: 0.051| (16) T cell: 0.02…
Ripply2	(1) PN NOR Chromaffin	3.65388	1.60755e-10	6.15179e-06	0.655	0.0951579	(0) E ADR Chromaffin: 2.42168025897791e-44| (2) PN ADR Chromaffin: 1.53438743396387e-54| (3) Endothelial: 3.95464644637256e-129| (4) Macrophage: 1.69611888057375e-121| (5) E NOR Chromaffin: 3.18844237806027e-22| (6) E Glia|SCP: 2.697384878637e-94| (7) Cortex ZG: 6.97027044126709e-94| (8) Cycling TH+: 6.26687698850938e-23| (9) Cortex X Zone: 6.80365034330082e-81| (10) E Neuroblast: 8.2183368895862…	(0) E ADR Chromaffin: 9.26728601505665e-40| (2) PN ADR Chromaffin: 5.87179383229292e-50| (3) Endothelial: 1.51336410209785e-124| (4) Macrophage: 6.49070773217964e-117| (5) E NOR Chromaffin: 1.2201531292361e-17| (6) E Glia|SCP: 1.03223524535681e-89| (7) Cortex ZG: 2.66738309246409e-89| (8) Cycling TH+: 2.39820848596277e-18| (9) Cortex X Zone: 2.60362091337436e-76| (10) E Neuroblast: 3.144993160906…	(0) E ADR Chromaffin: 1.34269591208502| (2) PN ADR Chromaffin: 1.45238968976095| (3) Endothelial: 6.49078785113507| (4) Macrophage: 6.19785927187831| (5) E NOR Chromaffin: 0.971514939387331| (6) E Glia|SCP: 5.52318310234122| (7) Cortex ZG: 6.01436954540301| (8) Cycling TH+: 1.26073907098295| (9) Cortex X Zone: 5.5273182800704| (10) E Neuroblast: 0.798720961713149| (11) PN Sustentacular: 5.1464876…	(0) E ADR Chromaffin: 0.346| (2) PN ADR Chromaffin: 0.27| (3) Endothelial: 0.003| (4) Macrophage: 0.007| (5) E NOR Chromaffin: 0.37| (6) E Glia|SCP: 0.007| (7) Cortex ZG: 0| (8) Cycling TH+: 0.369| (9) Cortex X Zone: 0.009| (10) E Neuroblast: 0.343| (11) PN Sustentacular: 0.004| (12) Cortex ZF: 0| (13) Macrophage: 0.01| (14) Cortex ZG: 0| (15) Dendritic cell: 0.01| (16) T cell: 0.011| (17) NK cel…
Ak5	(1) PN NOR Chromaffin	4.78349	3.78894e-08	0.00144995	0.629	0.0992105	(0) E ADR Chromaffin: 8.33528323838584e-42| (2) PN ADR Chromaffin: 5.5253921630385e-09| (3) Endothelial: 1.41145792315821e-117| (4) Macrophage: 2.20504968462103e-112| (5) E NOR Chromaffin: 1.21937460346393e-50| (6) E Glia|SCP: 2.02079037578222e-88| (7) Cortex ZG: 1.0192360357462e-83| (8) Cycling TH+: 1.71782885502916e-33| (9) Cortex X Zone: 1.4661841195981e-72| (10) E Neuroblast: 6.12679070237122…	(0) E ADR Chromaffin: 3.1897461896655e-37| (2) PN ADR Chromaffin: 0.000211445707295157| (3) Endothelial: 5.40136718034186e-113| (4) Macrophage: 8.43828413310774e-108| (5) E NOR Chromaffin: 4.66630273253578e-46| (6) E Glia|SCP: 7.7331606100434e-84| (7) Cortex ZG: 3.90041246159357e-79| (8) Cycling TH+: 6.5737874624256e-29| (9) Cortex X Zone: 5.61079338887802e-68| (10) E Neuroblast: 2.34460026598342…	(0) E ADR Chromaffin: 1.32224711028918| (2) PN ADR Chromaffin: 0.525107356528757| (3) Endothelial: 7.75496769496516| (4) Macrophage: 7.49431706016878| (5) E NOR Chromaffin: 2.06476898151062| (6) E Glia|SCP: 6.82514312708167| (7) Cortex ZG: 5.9469389800119| (8) Cycling TH+: 1.8371238630411| (9) Cortex X Zone: 6.10781698246593| (10) E Neuroblast: 3.98633035237647| (11) PN Sustentacular: 5.827602072…	(0) E ADR Chromaffin: 0.325| (2) PN ADR Chromaffin: 0.494| (3) Endothelial: 0.022| (4) Macrophage: 0.018| (5) E NOR Chromaffin: 0.199| (6) E Glia|SCP: 0.012| (7) Cortex ZG: 0.023| (8) Cycling TH+: 0.254| (9) Cortex X Zone: 0.032| (10) E Neuroblast: 0.064| (11) PN Sustentacular: 0.045| (12) Cortex ZF: 0.027| (13) Macrophage: 0.019| (14) Cortex ZG: 0.068| (15) Dendritic cell: 0.01| (16) T cell: 0| …
Tm4sf4	(1) PN NOR Chromaffin	5.8714	7.62968e-10	2.91973e-05	0.594	0.103842	(0) E ADR Chromaffin: 4.52417819348947e-40| (2) PN ADR Chromaffin: 1.50868413642724e-35| (3) Endothelial: 2.52645061458527e-110| (4) Macrophage: 1.00889843185303e-106| (5) E NOR Chromaffin: 1.42929388142861e-17| (6) E Glia|SCP: 5.04826494057078e-78| (7) Cortex ZG: 1.9287199396357e-79| (8) Cycling TH+: 1.92722876234958e-28| (9) Cortex X Zone: 1.03900212496114e-67| (10) E Neuroblast: 2.372922193373…	(0) E ADR Chromaffin: 1.73131251108455e-35| (2) PN ADR Chromaffin: 5.77343245327976e-31| (3) Endothelial: 9.6682212118949e-106| (4) Macrophage: 3.86085251901517e-102| (5) E NOR Chromaffin: 5.46962182545102e-13| (6) E Glia|SCP: 1.93187002745763e-73| (7) Cortex ZG: 7.3808254649979e-75| (8) Cycling TH+: 7.37511902775939e-24| (9) Cortex X Zone: 3.97605333180131e-63| (10) E Neuroblast: 9.0806986496023…	(0) E ADR Chromaffin: 1.84567940646663| (2) PN ADR Chromaffin: 1.85937033427131| (3) Endothelial: 8.46571442621177| (4) Macrophage: 9.23688987106344| (5) E NOR Chromaffin: 1.27050673442118| (6) E Glia|SCP: 6.71723594212632| (7) Cortex ZG: 8.31986733966909| (8) Cycling TH+: 2.54599982712767| (9) Cortex X Zone: 8.65965808014173| (10) E Neuroblast: 1.59808718688712| (11) PN Sustentacular: 5.98251115…	(0) E ADR Chromaffin: 0.325| (2) PN ADR Chromaffin: 0.339| (3) Endothelial: 0.012| (4) Macrophage: 0.004| (5) E NOR Chromaffin: 0.372| (6) E Glia|SCP: 0.029| (7) Cortex ZG: 0.013| (8) Cycling TH+: 0.294| (9) Cortex X Zone: 0.029| (10) E Neuroblast: 0.382| (11) PN Sustentacular: 0.062| (12) Cortex ZF: 0| (13) Macrophage: 0.029| (14) Cortex ZG: 0.049| (15) Dendritic cell: 0.01| (16) T cell: 0.011| …
Nrg3	(1) PN NOR Chromaffin	4.46617	4.8213e-14	1.84502e-09	0.812	0.157474	(0) E ADR Chromaffin: 6.29769014461664e-39| (2) PN ADR Chromaffin: 8.03778100596581e-21| (3) Endothelial: 6.6576743308296e-175| (4) Macrophage: 8.85890996567284e-167| (5) E NOR Chromaffin: 8.43228901760486e-13| (6) E Glia|SCP: 1.84824943864852e-128| (7) Cortex ZG: 3.55665576335364e-129| (8) Cycling TH+: 5.61562536350362e-51| (9) Cortex X Zone: 4.64414515940031e-113| (10) E Neuroblast: 1.314535387…	(0) E ADR Chromaffin: 2.4100000645419e-34| (2) PN ADR Chromaffin: 3.07589803536299e-16| (3) Endothelial: 2.54775881292187e-170| (4) Macrophage: 3.39012766566368e-162| (5) E NOR Chromaffin: 3.22686836125703e-08| (6) E Glia|SCP: 7.07288095182015e-124| (7) Cortex ZG: 1.36106102752017e-124| (8) Cycling TH+: 2.14898751410556e-46| (9) Cortex X Zone: 1.77722146959931e-108| (10) E Neuroblast: 5.030464020…	(0) E ADR Chromaffin: 1.21364371443299| (2) PN ADR Chromaffin: 0.72633032498984| (3) Endothelial: 7.38470538973666| (4) Macrophage: 7.22590505304516| (5) E NOR Chromaffin: 0.785719389857324| (6) E Glia|SCP: 5.71272138138885| (7) Cortex ZG: 7.2268702424441| (8) Cycling TH+: 2.17065633962543| (9) Cortex X Zone: 7.26001663896703| (10) E Neuroblast: 2.28590403596363| (11) PN Sustentacular: 4.43236256…	(0) E ADR Chromaffin: 0.62| (2) PN ADR Chromaffin: 0.623| (3) Endothelial: 0.013| (4) Macrophage: 0.013| (5) E NOR Chromaffin: 0.671| (6) E Glia|SCP: 0.022| (7) Cortex ZG: 0.01| (8) Cycling TH+: 0.43| (9) Cortex X Zone: 0.021| (10) E Neuroblast: 0.315| (11) PN Sustentacular: 0.036| (12) Cortex ZF: 0.018| (13) Macrophage: 0.029| (14) Cortex ZG: 0.058| (15) Dendritic cell: 0.04| (16) T cell: 0.045|…
Nlrp6	(1) PN NOR Chromaffin	5.33791	1.36894e-10	5.23866e-06	0.658	0.115211	(0) E ADR Chromaffin: 2.94300846174387e-37| (2) PN ADR Chromaffin: 1.49889694555211e-68| (3) Endothelial: 1.37279262702154e-126| (4) Macrophage: 1.30693297748898e-119| (5) E NOR Chromaffin: 2.62746995647743e-14| (6) E Glia|SCP: 5.46493388022348e-92| (7) Cortex ZG: 2.58304577680988e-93| (8) Cycling TH+: 1.89961666351311e-24| (9) Cortex X Zone: 1.03774179324551e-79| (10) E Neuroblast: 1.43329395935…	(0) E ADR Chromaffin: 1.12623047814014e-32| (2) PN ADR Chromaffin: 5.7359788312388e-64| (3) Endothelial: 5.25340282508603e-122| (4) Macrophage: 5.00137111825483e-115| (5) E NOR Chromaffin: 1.00548020294478e-09| (6) E Glia|SCP: 2.09132089728392e-87| (7) Cortex ZG: 9.88479957869604e-89| (8) Cycling TH+: 7.26945304793197e-20| (9) Cortex X Zone: 3.97123029439192e-75| (10) E Neuroblast: 5.484929323649…	(0) E ADR Chromaffin: 1.33108037248763| (2) PN ADR Chromaffin: 1.90820140936627| (3) Endothelial: 7.78988381915804| (4) Macrophage: 7.20374236943596| (5) E NOR Chromaffin: 0.820220322568135| (6) E Glia|SCP: 6.26267039961155| (7) Cortex ZG: 8.84208673761635| (8) Cycling TH+: 1.57495157857589| (9) Cortex X Zone: 7.81825163346863| (10) E Neuroblast: 1.28922702753944| (11) PN Sustentacular: 7.7246972…	(0) E ADR Chromaffin: 0.384| (2) PN ADR Chromaffin: 0.259| (3) Endothelial: 0.017| (4) Macrophage: 0.02| (5) E NOR Chromaffin: 0.433| (6) E Glia|SCP: 0.027| (7) Cortex ZG: 0.01| (8) Cycling TH+: 0.369| (9) Cortex X Zone: 0.026| (10) E Neuroblast: 0.378| (11) PN Sustentacular: 0.027| (12) Cortex ZF: 0.027| (13) Macrophage: 0.048| (14) Cortex ZG: 0.01| (15) Dendritic cell: 0.01| (16) T cell: 0.045|…
Amigo1	(1) PN NOR Chromaffin	2.2389	2.84063e-09	0.000108705	0.632	0.186579	(0) E ADR Chromaffin: 1.50132131795673e-32| (2) PN ADR Chromaffin: 1.4492931335359e-16| (3) Endothelial: 3.82665939055728e-84| (4) Macrophage: 3.48363221995883e-92| (5) E NOR Chromaffin: 5.395770695924e-19| (6) E Glia|SCP: 4.77578388291001e-58| (7) Cortex ZG: 1.63943902975116e-28| (8) Cycling TH+: 9.19875115141271e-31| (9) Cortex X Zone: 3.03380278646278e-33| (10) E Neuroblast: 1.05291929207629e-…	(0) E ADR Chromaffin: 5.7452564195568e-28| (2) PN ADR Chromaffin: 5.54615496341516e-12| (3) Endothelial: 1.46438601557846e-79| (4) Macrophage: 1.33311637793384e-87| (5) E NOR Chromaffin: 2.06485352991619e-14| (6) E Glia|SCP: 1.827596976312e-53| (7) Cortex ZG: 6.27380527905174e-24| (8) Cycling TH+: 3.52017809062261e-26| (9) Cortex X Zone: 1.16097565032358e-28| (10) E Neuroblast: 4.02931154691756e-…	(0) E ADR Chromaffin: 1.17245027322544| (2) PN ADR Chromaffin: 0.649692450550086| (3) Endothelial: 1.90275708891906| (4) Macrophage: 3.24390764109039| (5) E NOR Chromaffin: 1.0578692872551| (6) E Glia|SCP: 2.28416363338665| (7) Cortex ZG: 1.24781501752691| (8) Cycling TH+: 1.69702359438728| (9) Cortex X Zone: 2.01477035712174| (10) E Neuroblast: 1.58808941033831| (11) PN Sustentacular: 1.78165419…	(0) E ADR Chromaffin: 0.373| (2) PN ADR Chromaffin: 0.436| (3) Endothelial: 0.096| (4) Macrophage: 0.068| (5) E NOR Chromaffin: 0.384| (6) E Glia|SCP: 0.121| (7) Cortex ZG: 0.268| (8) Cycling TH+: 0.267| (9) Cortex X Zone: 0.256| (10) E Neuroblast: 0.251| (11) PN Sustentacular: 0.116| (12) Cortex ZF: 0.209| (13) Macrophage: 0.095| (14) Cortex ZG: 0.223| (15) Dendritic cell: 0.03| (16) T cell: 0.0…
Gpr155	(1) PN NOR Chromaffin	3.01884	2.92513e-14	1.11939e-09	0.868	0.269474	(0) E ADR Chromaffin: 1.05007319140405e-31| (2) PN ADR Chromaffin: 2.10095746859324e-15| (3) Endothelial: 4.51693506748594e-142| (4) Macrophage: 1.26704946604402e-87| (5) E NOR Chromaffin: 1.11450846146795e-28| (6) E Glia|SCP: 4.62981451490367e-79| (7) Cortex ZG: 1.67083466493605e-138| (8) Cycling TH+: 2.74742764669282e-53| (9) Cortex X Zone: 1.08040362290659e-120| (10) E Neuroblast: 2.6257320468…	(0) E ADR Chromaffin: 4.01842008886501e-27| (2) PN ADR Chromaffin: 8.03994404081259e-11| (3) Endothelial: 1.72854071162552e-137| (4) Macrophage: 4.84874489665725e-83| (5) E NOR Chromaffin: 4.26500098034556e-24| (6) E Glia|SCP: 1.77173741856334e-74| (7) Cortex ZG: 6.39395009577726e-134| (8) Cycling TH+: 1.05138561183641e-48| (9) Cortex X Zone: 4.13448858413894e-116| (10) E Neuroblast: 1.0048151397…	(0) E ADR Chromaffin: 0.837797649065144| (2) PN ADR Chromaffin: 0.560075921211444| (3) Endothelial: 2.56640850392779| (4) Macrophage: 1.70508500554134| (5) E NOR Chromaffin: 0.917630700950644| (6) E Glia|SCP: 2.10115803735696| (7) Cortex ZG: 5.27393896881631| (8) Cycling TH+: 1.74180355381578| (9) Cortex X Zone: 5.88809596277381| (10) E Neuroblast: 3.1397372685526| (11) PN Sustentacular: 1.955904…	(0) E ADR Chromaffin: 0.692| (2) PN ADR Chromaffin: 0.722| (3) Endothelial: 0.145| (4) Macrophage: 0.312| (5) E NOR Chromaffin: 0.6| (6) E Glia|SCP: 0.282| (7) Cortex ZG: 0.033| (8) Cycling TH+: 0.481| (9) Cortex X Zone: 0.079| (10) E Neuroblast: 0.247| (11) PN Sustentacular: 0.223| (12) Cortex ZF: 0.055| (13) Macrophage: 0.267| (14) Cortex ZG: 0.068| (15) Dendritic cell: 0.303| (16) T cell: 0.09…
Lhfpl5	(1) PN NOR Chromaffin	5.1002	1.82241e-11	6.974e-07	0.669	0.0988421	(0) E ADR Chromaffin: 4.21965595967925e-30| (2) PN ADR Chromaffin: 1.35304629220296e-12| (3) Endothelial: 1.51532233056373e-131| (4) Macrophage: 6.24878588597431e-124| (5) E NOR Chromaffin: 9.20201817136556e-35| (6) E Glia|SCP: 9.28386302463882e-98| (7) Cortex ZG: 2.00913662173472e-95| (8) Cycling TH+: 2.92495224037024e-34| (9) Cortex X Zone: 4.01997773843916e-84| (10) E Neuroblast: 9.78105564929…	(0) E ADR Chromaffin: 1.61477794265006e-25| (2) PN ADR Chromaffin: 5.17783755100229e-08| (3) Endothelial: 5.7988354946013e-127| (4) Macrophage: 2.39128538284465e-119| (5) E NOR Chromaffin: 3.52142831381817e-30| (6) E Glia|SCP: 3.55274870226878e-93| (7) Cortex ZG: 7.68856402405441e-91| (8) Cycling TH+: 1.11932072334488e-29| (9) Cortex X Zone: 1.5383650809459e-79| (10) E Neuroblast: 3.7430143758718…	(0) E ADR Chromaffin: 0.877632001268866| (2) PN ADR Chromaffin: 0.523520401564553| (3) Endothelial: 7.18331211842969| (4) Macrophage: 6.98401277294658| (5) E NOR Chromaffin: 1.28147558600465| (6) E Glia|SCP: 7.07005034931935| (7) Cortex ZG: 8.01312249940495| (8) Cycling TH+: 1.64822819891036| (9) Cortex X Zone: 7.99502062822967| (10) E Neuroblast: 1.41940307104575| (11) PN Sustentacular: 5.823586…	(0) E ADR Chromaffin: 0.408| (2) PN ADR Chromaffin: 0.492| (3) Endothelial: 0.008| (4) Macrophage: 0.013| (5) E NOR Chromaffin: 0.303| (6) E Glia|SCP: 0.01| (7) Cortex ZG: 0.013| (8) Cycling TH+: 0.305| (9) Cortex X Zone: 0.009| (10) E Neuroblast: 0.255| (11) PN Sustentacular: 0.018| (12) Cortex ZF: 0| (13) Macrophage: 0.019| (14) Cortex ZG: 0| (15) Dendritic cell: 0.01| (16) T cell: 0| (17) NK c…
Tmem74	(1) PN NOR Chromaffin	3.94939	2.06039e-08	0.000788472	0.518	0.0804211	(0) E ADR Chromaffin: 5.20075587839283e-30| (2) PN ADR Chromaffin: 2.82767273115749e-29| (3) Endothelial: 5.96349298085869e-94| (4) Macrophage: 1.53162847135996e-88| (5) E NOR Chromaffin: 2.84755837662117e-12| (6) E Glia|SCP: 1.13766264416156e-59| (7) Cortex ZG: 2.33957383601301e-67| (8) Cycling TH+: 3.44395465304401e-12| (9) Cortex X Zone: 2.32082258810769e-57| (10) E Neuroblast: 9.1440166314339…	(0) E ADR Chromaffin: 1.99022525954337e-25| (2) PN ADR Chromaffin: 1.08209380075935e-24| (3) Endothelial: 2.282109493915e-89| (4) Macrophage: 5.86123583420029e-84| (5) E NOR Chromaffin: 1.08970363956539e-07| (6) E Glia|SCP: 4.35360740667745e-55| (7) Cortex ZG: 8.9530811556546e-63| (8) Cycling TH+: 1.31793256662688e-07| (9) Cortex X Zone: 8.8813238801705e-53| (10) E Neuroblast: 3.49923228451715e-1…	(0) E ADR Chromaffin: 1.55544888888988| (2) PN ADR Chromaffin: 1.28201786235579| (3) Endothelial: 7.56794161969212| (4) Macrophage: 7.45401570277828| (5) E NOR Chromaffin: 0.994284394821378| (6) E Glia|SCP: 3.80771589538834| (7) Cortex ZG: 7.03503845060092| (8) Cycling TH+: 1.00464493413562| (9) Cortex X Zone: 5.69421815335883| (10) E Neuroblast: 1.65614712050775| (11) PN Sustentacular: 3.9966142…	(0) E ADR Chromaffin: 0.285| (2) PN ADR Chromaffin: 0.261| (3) Endothelial: 0.002| (4) Macrophage: 0.004| (5) E NOR Chromaffin: 0.335| (6) E Glia|SCP: 0.036| (7) Cortex ZG: 0| (8) Cycling TH+: 0.307| (9) Cortex X Zone: 0.006| (10) E Neuroblast: 0.207| (11) PN Sustentacular: 0.027| (12) Cortex ZF: 0| (13) Macrophage: 0.01| (14) Cortex ZG: 0.01| (15) Dendritic cell: 0| (16) T cell: 0.023| (17) NK c…
Wbscr27	(1) PN NOR Chromaffin	2.64361	6.97581e-08	0.0026695	0.54	0.159474	(0) E ADR Chromaffin: 9.24830302401163e-29| (2) PN ADR Chromaffin: 8.18926888602628e-21| (3) Endothelial: 8.28681133820279e-78| (4) Macrophage: 3.11034851617382e-87| (5) E NOR Chromaffin: 9.35050724153008e-25| (6) E Glia|SCP: 1.12720810339128e-43| (7) Cortex ZG: 1.01667966078211e-11| (8) Cycling TH+: 4.17305162459006e-22| (9) Cortex X Zone: 8.53478569787192e-26| (10) E Neuroblast: 1.4416387105859…	(0) E ADR Chromaffin: 3.53914060122877e-24| (2) PN ADR Chromaffin: 3.13386941730454e-16| (3) Endothelial: 3.17119696290344e-73| (4) Macrophage: 1.1902681701694e-82| (5) E NOR Chromaffin: 3.57825211118873e-20| (6) E Glia|SCP: 4.31359997005776e-39| (7) Cortex ZG: 3.89062972588097e-07| (8) Cycling TH+: 1.59694339569812e-17| (9) Cortex X Zone: 3.26609179086162e-21| (10) E Neuroblast: 5.51686301767047…	(0) E ADR Chromaffin: 1.19454668251843| (2) PN ADR Chromaffin: 0.932196332448596| (3) Endothelial: 2.75995639612928| (4) Macrophage: 4.99157004731557| (5) E NOR Chromaffin: 1.45700105416882| (6) E Glia|SCP: 2.52366704458178| (7) Cortex ZG: 0.687332886645599| (8) Cycling TH+: 1.49099358578436| (9) Cortex X Zone: 1.87723845231784| (10) E Neuroblast: 1.94803865219814| (11) PN Sustentacular: 2.137988…	(0) E ADR Chromaffin: 0.3| (2) PN ADR Chromaffin: 0.329| (3) Endothelial: 0.054| (4) Macrophage: 0.022| (5) E NOR Chromaffin: 0.256| (6) E Glia|SCP: 0.129| (7) Cortex ZG: 0.316| (8) Cycling TH+: 0.254| (9) Cortex X Zone: 0.212| (10) E Neuroblast: 0.207| (11) PN Sustentacular: 0.103| (12) Cortex ZF: 0.318| (13) Macrophage: 0.048| (14) Cortex ZG: 0.214| (15) Dendritic cell: 0.04| (16) T cell: 0.034…
Tmem179	(1) PN NOR Chromaffin	5.53745	7.02045e-11	2.68659e-06	0.643	0.117053	(0) E ADR Chromaffin: 6.39312488598612e-28| (2) PN ADR Chromaffin: 9.68740857042422e-13| (3) Endothelial: 1.9421958507174e-122| (4) Macrophage: 3.04696080003912e-114| (5) E NOR Chromaffin: 3.81274346240038e-40| (6) E Glia|SCP: 2.91444341406734e-93| (7) Cortex ZG: 3.25696481699165e-84| (8) Cycling TH+: 1.08485869486359e-28| (9) Cortex X Zone: 1.158558452765e-77| (10) E Neuroblast: 1.15435851326939…	(0) E ADR Chromaffin: 2.44652103136917e-23| (2) PN ADR Chromaffin: 3.70717751172994e-08| (3) Endothelial: 7.43239508152534e-118| (4) Macrophage: 1.16601095895897e-109| (5) E NOR Chromaffin: 1.45906066819138e-35| (6) E Glia|SCP: 1.11529920569529e-88| (7) Cortex ZG: 1.24637529616637e-79| (8) Cycling TH+: 4.15153725350398e-24| (9) Cortex X Zone: 4.43357148704111e-73| (10) E Neuroblast: 4.41749915857…	(0) E ADR Chromaffin: 1.07944999850496| (2) PN ADR Chromaffin: 0.742825452884307| (3) Endothelial: 8.27104429782657| (4) Macrophage: 7.28467053792737| (5) E NOR Chromaffin: 1.62102725253418| (6) E Glia|SCP: 9.12585239203659| (7) Cortex ZG: 5.72921695383707| (8) Cycling TH+: 1.70668645823302| (9) Cortex X Zone: 7.87865713843168| (10) E Neuroblast: 1.27893900386127| (11) PN Sustentacular: 7.0137374…	(0) E ADR Chromaffin: 0.445| (2) PN ADR Chromaffin: 0.542| (3) Endothelial: 0.019| (4) Macrophage: 0.027| (5) E NOR Chromaffin: 0.272| (6) E Glia|SCP: 0.005| (7) Cortex ZG: 0.04| (8) Cycling TH+: 0.353| (9) Cortex X Zone: 0.021| (10) E Neuroblast: 0.343| (11) PN Sustentacular: 0.04| (12) Cortex ZF: 0.027| (13) Macrophage: 0.019| (14) Cortex ZG: 0.01| (15) Dendritic cell: 0.01| (16) T cell: 0.023|…
Ppp2r2c	(1) PN NOR Chromaffin	4.93284	9.09e-15	3.47856e-10	0.83	0.186737	(0) E ADR Chromaffin: 1.23139093918544e-26| (2) PN ADR Chromaffin: 4.18305379270877e-39| (3) Endothelial: 7.28513953934185e-177| (4) Macrophage: 1.69186232850892e-171| (5) E NOR Chromaffin: 1.38875709478883e-13| (6) E Glia|SCP: 2.51693438955425e-132| (7) Cortex ZG: 7.45951181206181e-134| (8) Cycling TH+: 5.0833887213319e-22| (9) Cortex X Zone: 9.65826586374116e-118| (10) E Neuroblast: 3.982363654…	(0) E ADR Chromaffin: 4.71228684607484e-22| (2) PN ADR Chromaffin: 1.60077102539379e-34| (3) Endothelial: 2.78787719891534e-172| (4) Macrophage: 6.47441875873795e-167| (5) E NOR Chromaffin: 5.31449565033788e-09| (6) E Glia|SCP: 9.63180452194622e-128| (7) Cortex ZG: 2.85460598023981e-129| (8) Cycling TH+: 1.94531119587929e-17| (9) Cortex X Zone: 3.69602518073647e-113| (10) E Neuroblast: 1.52397092…	(0) E ADR Chromaffin: 0.763719768909048| (2) PN ADR Chromaffin: 1.04141494777407| (3) Endothelial: 6.64472014904142| (4) Macrophage: 6.89655681971987| (5) E NOR Chromaffin: 0.542604690889965| (6) E Glia|SCP: 6.15018199958855| (7) Cortex ZG: 7.18461561160685| (8) Cycling TH+: 1.02491247017683| (9) Cortex X Zone: 7.27137866464867| (10) E Neuroblast: 1.17035456034866| (11) PN Sustentacular: 6.366143…	(0) E ADR Chromaffin: 0.666| (2) PN ADR Chromaffin: 0.602| (3) Endothelial: 0.039| (4) Macrophage: 0.022| (5) E NOR Chromaffin: 0.646| (6) E Glia|SCP: 0.044| (7) Cortex ZG: 0.008| (8) Cycling TH+: 0.631| (9) Cortex X Zone: 0.015| (10) E Neuroblast: 0.506| (11) PN Sustentacular: 0.076| (12) Cortex ZF: 0.064| (13) Macrophage: 0.029| (14) Cortex ZG: 0.019| (15) Dendritic cell: 0.02| (16) T cell: 0.0…
Cntnap5a	(1) PN NOR Chromaffin	4.77588	6.44873e-18	2.4678e-13	0.924	0.254842	(0) E ADR Chromaffin: 2.78692101594477e-22| (2) PN ADR Chromaffin: 6.69135838313272e-21| (3) Endothelial: 2.54600158496118e-206| (4) Macrophage: 2.44749682865846e-202| (5) E NOR Chromaffin: 1.22173948713542e-17| (6) E Glia|SCP: 3.89190600033923e-160| (7) Cortex ZG: 6.36029788516517e-160| (8) Cycling TH+: 3.19629584131666e-46| (9) Cortex X Zone: 1.07138055101152e-140| (10) E Neuroblast: 3.72315938…	(0) E ADR Chromaffin: 1.06649893438175e-17| (2) PN ADR Chromaffin: 2.56064902605723e-16| (3) Endothelial: 9.74303886532945e-202| (4) Macrophage: 9.36608086391018e-198| (5) E NOR Chromaffin: 4.67535266936984e-13| (6) E Glia|SCP: 1.48935458820982e-155| (7) Cortex ZG: 2.43395879469501e-155| (8) Cycling TH+: 1.22315849255506e-41| (9) Cortex X Zone: 4.0999590926109e-136| (10) E Neuroblast: 1.424778634…	(0) E ADR Chromaffin: 0.716183989556943| (2) PN ADR Chromaffin: 0.578127452597565| (3) Endothelial: 5.43224829042946| (4) Macrophage: 6.26051143864153| (5) E NOR Chromaffin: 0.72069331516665| (6) E Glia|SCP: 6.48394872267253| (7) Cortex ZG: 7.5692264768781| (8) Cycling TH+: 1.53929283752056| (9) Cortex X Zone: 7.46293337220491| (10) E Neuroblast: 1.70197003400242| (11) PN Sustentacular: 5.0566451…	(0) E ADR Chromaffin: 0.913| (2) PN ADR Chromaffin: 0.881| (3) Endothelial: 0.035| (4) Macrophage: 0.034| (5) E NOR Chromaffin: 0.862| (6) E Glia|SCP: 0.051| (7) Cortex ZG: 0.018| (8) Cycling TH+: 0.743| (9) Cortex X Zone: 0.035| (10) E Neuroblast: 0.598| (11) PN Sustentacular: 0.116| (12) Cortex ZF: 0.027| (13) Macrophage: 0.076| (14) Cortex ZG: 0.126| (15) Dendritic cell: 0.061| (16) T cell: 0.…
Edn3	(1) PN NOR Chromaffin	5.20804	1.20641e-09	4.61668e-05	0.741	0.168316	(0) E ADR Chromaffin: 2.82685229474816e-22| (2) PN ADR Chromaffin: 2.28679871491106e-08| (3) Endothelial: 4.45758552216144e-142| (4) Macrophage: 3.80849614112049e-138| (5) E NOR Chromaffin: 1.38215881912411e-17| (6) E Glia|SCP: 1.44120606608493e-111| (7) Cortex ZG: 7.81087909856749e-111| (8) Cycling TH+: 4.80588828233804e-38| (9) Cortex X Zone: 2.38119936963186e-95| (10) E Neuroblast: 4.999874469…	(0) E ADR Chromaffin: 1.08177983615423e-17| (2) PN ADR Chromaffin: 0.000875112132222165| (3) Endothelial: 1.70582882762074e-137| (4) Macrophage: 1.45743530328399e-133| (5) E NOR Chromaffin: 5.28924536902414e-13| (6) E Glia|SCP: 5.51520737369382e-107| (7) Cortex ZG: 2.98906721343981e-106| (8) Cycling TH+: 1.83911732788512e-33| (9) Cortex X Zone: 9.11237374770722e-91| (10) E Neuroblast: 1.913351961…	(0) E ADR Chromaffin: 1.06068023215273| (2) PN ADR Chromaffin: 0.628777306632373| (3) Endothelial: 6.33523711955671| (4) Macrophage: 7.77345447015418| (5) E NOR Chromaffin: 0.727166793310123| (6) E Glia|SCP: 7.9204477319599| (7) Cortex ZG: 8.98713711015812| (8) Cycling TH+: 1.93986230446431| (9) Cortex X Zone: 8.82137603984716| (10) E Neuroblast: 2.82715284385358| (11) PN Sustentacular: 6.5123996…	(0) E ADR Chromaffin: 0.602| (2) PN ADR Chromaffin: 0.695| (3) Endothelial: 0.057| (4) Macrophage: 0.052| (5) E NOR Chromaffin: 0.484| (6) E Glia|SCP: 0.034| (7) Cortex ZG: 0.02| (8) Cycling TH+: 0.401| (9) Cortex X Zone: 0.044| (10) E Neuroblast: 0.195| (11) PN Sustentacular: 0.058| (12) Cortex ZF: 0.036| (13) Macrophage: 0.01| (14) Cortex ZG: 0.019| (15) Dendritic cell: 0.051| (16) T cell: 0.05…
Negr1	(1) PN NOR Chromaffin	3.77995	2.17583e-11	8.32647e-07	0.871	0.248474	(0) E ADR Chromaffin: 3.67278755751172e-10| (2) PN ADR Chromaffin: 1.28925300386346e-13| (3) Endothelial: 8.53109695904328e-190| (4) Macrophage: 7.38667198224556e-155| (5) E NOR Chromaffin: 1.87875746915381e-36| (6) E Glia|SCP: 7.5013674838476e-60| (7) Cortex ZG: 5.78294747226535e-145| (8) Cycling TH+: 4.15496736349445e-17| (9) Cortex X Zone: 2.47702556102272e-125| (10) E Neuroblast: 9.6952954192…	(0) E ADR Chromaffin: 1.40550234250859e-05| (2) PN ADR Chromaffin: 4.93371339518471e-09| (3) Endothelial: 3.26468018428668e-185| (4) Macrophage: 2.82673163416573e-150| (5) E NOR Chromaffin: 7.18962908295778e-32| (6) E Glia|SCP: 2.8706233087188e-55| (7) Cortex ZG: 2.2130183386865e-140| (8) Cycling TH+: 1.59002291066206e-12| (9) Cortex X Zone: 9.47908141692175e-121| (10) E Neuroblast: 3.71019565104…	(0) E ADR Chromaffin: 0.509378536979498| (2) PN ADR Chromaffin: 0.549425791781006| (3) Endothelial: 6.25042349487445| (4) Macrophage: 3.80229731147865| (5) E NOR Chromaffin: 1.11904159696159| (6) E Glia|SCP: 1.54644960121959| (7) Cortex ZG: 7.61859196616349| (8) Cycling TH+: 0.910267805621023| (9) Cortex X Zone: 6.62680030486055| (10) E Neuroblast: 1.53068465619556| (11) PN Sustentacular: 2.72998…	(0) E ADR Chromaffin: 0.808| (2) PN ADR Chromaffin: 0.762| (3) Endothelial: 0.032| (4) Macrophage: 0.106| (5) E NOR Chromaffin: 0.6| (6) E Glia|SCP: 0.403| (7) Cortex ZG: 0.018| (8) Cycling TH+: 0.703| (9) Cortex X Zone: 0.038| (10) E Neuroblast: 0.534| (11) PN Sustentacular: 0.143| (12) Cortex ZF: 0.018| (13) Macrophage: 0.038| (14) Cortex ZG: 0.029| (15) Dendritic cell: 0.03| (16) T cell: 0.023…
Mt1	(2) PN ADR Chromaffin	3.30702	2.87462e-10	1.10006e-05	0.99	0.803211	(0) E ADR Chromaffin: 3.28325163606681e-192| (1) PN NOR Chromaffin: 7.66562195771542e-100| (3) Endothelial: 3.79351530389229e-181| (4) Macrophage: 3.1773137718793e-80| (5) E NOR Chromaffin: 3.25520128229319e-183| (6) E Glia|SCP: 3.33998716308475e-142| (7) Cortex ZG: 6.40179529006167e-64| (8) Cycling TH+: 2.4608753932496e-132| (9) Cortex X Zone: 2.33357692591416e-131| (10) E Neuroblast: 6.24826036…	(0) E ADR Chromaffin: 1.25643473609005e-187| (1) PN NOR Chromaffin: 2.93348021077854e-95| (3) Endothelial: 1.4517024364935e-176| (4) Macrophage: 1.21589443422277e-75| (5) E NOR Chromaffin: 1.24570042670796e-178| (6) E Glia|SCP: 1.27814628756927e-137| (7) Cortex ZG: 2.4498390216008e-59| (8) Cycling TH+: 9.41727795488755e-128| (9) Cortex X Zone: 8.93013218008829e-127| (10) E Neuroblast: 2.391084277…	(0) E ADR Chromaffin: 3.0757881701608| (1) PN NOR Chromaffin: 1.67597876798215| (3) Endothelial: 3.90619296911203| (4) Macrophage: 1.97865150836754| (5) E NOR Chromaffin: 5.13356371209865| (6) E Glia|SCP: 3.95564999915978| (7) Cortex ZG: 1.80645444190127| (8) Cycling TH+: 3.75714159848161| (9) Cortex X Zone: 4.39255560425346| (10) E Neuroblast: 5.18459444395511| (11) PN Sustentacular: 2.479724833…	(0) E ADR Chromaffin: 0.842| (1) PN NOR Chromaffin: 0.903| (3) Endothelial: 0.747| (4) Macrophage: 0.989| (5) E NOR Chromaffin: 0.498| (6) E Glia|SCP: 0.609| (7) Cortex ZG: 0.95| (8) Cycling TH+: 0.636| (9) Cortex X Zone: 0.841| (10) E Neuroblast: 0.486| (11) PN Sustentacular: 0.812| (12) Cortex ZF: 0.973| (13) Macrophage: 0.981| (14) Cortex ZG: 0.864| (15) Dendritic cell: 0.879| (16) T cell: 0.6…
Mt2	(2) PN ADR Chromaffin	4.34541	1.21829e-15	4.66216e-11	0.904	0.278579	(0) E ADR Chromaffin: 2.03038584871946e-168| (1) PN NOR Chromaffin: 1.53076532245863e-99| (3) Endothelial: 3.6255169307169e-177| (4) Macrophage: 3.58517656804487e-163| (5) E NOR Chromaffin: 1.47016479381303e-167| (6) E Glia|SCP: 6.89201685714601e-146| (7) Cortex ZG: 7.90523968386865e-118| (8) Cycling TH+: 5.2610529650461e-98| (9) Cortex X Zone: 1.19152734368584e-128| (10) E Neuroblast: 9.67941623…	(0) E ADR Chromaffin: 7.76988056587963e-164| (1) PN NOR Chromaffin: 5.85793273598467e-95| (3) Endothelial: 1.38741281904674e-172| (4) Macrophage: 1.37197536905941e-158| (5) E NOR Chromaffin: 5.62602663296371e-163| (6) E Glia|SCP: 2.63743701089263e-141| (7) Cortex ZG: 3.02517712222285e-113| (8) Cycling TH+: 2.01329974866384e-93| (9) Cortex X Zone: 4.55973683881698e-124| (10) E Neuroblast: 3.704119…	(0) E ADR Chromaffin: 3.32448153875522| (1) PN NOR Chromaffin: 2.10213313358206| (3) Endothelial: 4.93440113335063| (4) Macrophage: 4.93572544075663| (5) E NOR Chromaffin: 6.31805607608692| (6) E Glia|SCP: 6.13267037160805| (7) Cortex ZG: 4.30249007601563| (8) Cycling TH+: 3.39232272502847| (9) Cortex X Zone: 6.512188419643| (10) E Neuroblast: 4.2902932717749| (11) PN Sustentacular: 3.41763774730…	(0) E ADR Chromaffin: 0.43| (1) PN NOR Chromaffin: 0.568| (3) Endothelial: 0.153| (4) Macrophage: 0.223| (5) E NOR Chromaffin: 0.116| (6) E Glia|SCP: 0.129| (7) Cortex ZG: 0.303| (8) Cycling TH+: 0.385| (9) Cortex X Zone: 0.124| (10) E Neuroblast: 0.255| (11) PN Sustentacular: 0.308| (12) Cortex ZF: 0.645| (13) Macrophage: 0.286| (14) Cortex ZG: 0.097| (15) Dendritic cell: 0.374| (16) T cell: 0.0…
Chga	(2) PN ADR Chromaffin	6.57791	2.95267e-21	1.12993e-16	0.999	0.824421	(0) E ADR Chromaffin: 6.69396502555125e-147| (1) PN NOR Chromaffin: 2.37251776770334e-162| (3) Endothelial: 1.38051765994382e-230| (4) Macrophage: 1.43003275663087e-221| (5) E NOR Chromaffin: 1.84755113727349e-182| (6) E Glia|SCP: 6.83713436848831e-183| (7) Cortex ZG: 1.27428419613156e-181| (8) Cycling TH+: 1.18904818279074e-142| (9) Cortex X Zone: 3.24905662811017e-160| (10) E Neuroblast: 6.0812…	(0) E ADR Chromaffin: 2.56164653597795e-142| (1) PN NOR Chromaffin: 9.07915099344714e-158| (3) Endothelial: 5.28296498107301e-226| (4) Macrophage: 5.472449353075e-217| (5) E NOR Chromaffin: 7.07020869211821e-178| (6) E Glia|SCP: 2.61643458013311e-178| (7) Cortex ZG: 4.87643076175624e-177| (8) Cycling TH+: 4.55024958590359e-138| (9) Cortex X Zone: 1.2433489904452e-155| (10) E Neuroblast: 2.3271648…	(0) E ADR Chromaffin: 0.658082207953843| (1) PN NOR Chromaffin: 0.888862276470084| (3) Endothelial: 8.15762256812359| (4) Macrophage: 8.25792221251817| (5) E NOR Chromaffin: 2.04835181246416| (6) E Glia|SCP: 8.2300294053931| (7) Cortex ZG: 8.87579455018426| (8) Cycling TH+: 1.7524021051457| (9) Cortex X Zone: 8.77380391673338| (10) E Neuroblast: 2.84006234318785| (11) PN Sustentacular: 8.27005563…	(0) E ADR Chromaffin: 1| (1) PN NOR Chromaffin: 1| (3) Endothelial: 0.737| (4) Macrophage: 0.81| (5) E NOR Chromaffin: 0.998| (6) E Glia|SCP: 0.879| (7) Cortex ZG: 0.253| (8) Cycling TH+: 0.997| (9) Cortex X Zone: 0.962| (10) E Neuroblast: 1| (11) PN Sustentacular: 0.884| (12) Cortex ZF: 0.636| (13) Macrophage: 0.924| (14) Cortex ZG: 0.961| (15) Dendritic cell: 0.818| (16) T cell: 0.909| (17) NK …
Slc6a4	(2) PN ADR Chromaffin	7.22182	5.31159e-17	2.03264e-12	0.879	0.124053	(0) E ADR Chromaffin: 7.60044760435791e-131| (1) PN NOR Chromaffin: 2.76968791392484e-189| (3) Endothelial: 9.77911605790714e-190| (4) Macrophage: 9.39353354291861e-183| (5) E NOR Chromaffin: 3.91272431447154e-170| (6) E Glia|SCP: 3.9326130691103e-150| (7) Cortex ZG: 1.77697641260848e-147| (8) Cycling TH+: 5.62166545143272e-108| (9) Cortex X Zone: 8.08253308678895e-129| (10) E Neuroblast: 5.84360…	(0) E ADR Chromaffin: 2.90853928923569e-126| (1) PN NOR Chromaffin: 1.05990417090076e-184| (3) Endothelial: 3.7422721330399e-185| (4) Macrophage: 3.59471741620409e-178| (5) E NOR Chromaffin: 1.49732134066197e-165| (6) E Glia|SCP: 1.50493236928713e-145| (7) Cortex ZG: 6.80013333577015e-143| (8) Cycling TH+: 2.15129893495427e-103| (9) Cortex X Zone: 3.09302376165239e-124| (10) E Neuroblast: 2.23622…	(0) E ADR Chromaffin: 2.46927299641046| (1) PN NOR Chromaffin: 3.94608278749615| (3) Endothelial: 8.40487509377318| (4) Macrophage: 8.3362331386717| (5) E NOR Chromaffin: 7.88366598855322| (6) E Glia|SCP: 9.8327161608152| (7) Cortex ZG: 10.6767100108846| (8) Cycling TH+: 3.58868428850104| (9) Cortex X Zone: 10.4919981501451| (10) E Neuroblast: 3.12733525976864| (11) PN Sustentacular: 8.0409601991…	(0) E ADR Chromaffin: 0.478| (1) PN NOR Chromaffin: 0.263| (3) Endothelial: 0.088| (4) Macrophage: 0.074| (5) E NOR Chromaffin: 0.03| (6) E Glia|SCP: 0.029| (7) Cortex ZG: 0.018| (8) Cycling TH+: 0.233| (9) Cortex X Zone: 0.047| (10) E Neuroblast: 0.335| (11) PN Sustentacular: 0.129| (12) Cortex ZF: 0.073| (13) Macrophage: 0.095| (14) Cortex ZG: 0.068| (15) Dendritic cell: 0.061| (16) T cell: 0.0…
Pcsk1	(2) PN ADR Chromaffin	6.40193	6.50188e-19	2.48814e-14	0.935	0.157632	(0) E ADR Chromaffin: 6.00812750370275e-120| (1) PN NOR Chromaffin: 6.39485169209262e-93| (3) Endothelial: 1.60280961154542e-214| (4) Macrophage: 9.38663560228062e-201| (5) E NOR Chromaffin: 2.00439750050592e-166| (6) E Glia|SCP: 1.24026312986874e-167| (7) Cortex ZG: 1.36346184960343e-163| (8) Cycling TH+: 2.62880077078428e-87| (9) Cortex X Zone: 9.36968964536166e-143| (10) E Neuroblast: 8.219831…	(0) E ADR Chromaffin: 2.29919023311697e-115| (1) PN NOR Chromaffin: 2.44718184553e-88| (3) Endothelial: 6.13363182146202e-210| (4) Macrophage: 3.59207771228075e-196| (5) E NOR Chromaffin: 7.67042835493605e-162| (6) E Glia|SCP: 4.74623894538168e-163| (7) Cortex ZG: 5.2176958060624e-159| (8) Cycling TH+: 1.00598947896373e-82| (9) Cortex X Zone: 3.585592833487e-138| (10) E Neuroblast: 3.145565217131…	(0) E ADR Chromaffin: 1.7913718525418| (1) PN NOR Chromaffin: 1.6174441923297| (3) Endothelial: 7.07698447236401| (4) Macrophage: 5.93693811948823| (5) E NOR Chromaffin: 4.58752678797237| (6) E Glia|SCP: 9.18606240707261| (7) Cortex ZG: 8.6548669994222| (8) Cycling TH+: 2.29835103975727| (9) Cortex X Zone: 7.61592129221557| (10) E Neuroblast: 6.4981870784654| (11) PN Sustentacular: 7.852915901891…	(0) E ADR Chromaffin: 0.622| (1) PN NOR Chromaffin: 0.784| (3) Endothelial: 0.054| (4) Macrophage: 0.072| (5) E NOR Chromaffin: 0.22| (6) E Glia|SCP: 0.024| (7) Cortex ZG: 0.02| (8) Cycling TH+: 0.511| (9) Cortex X Zone: 0.065| (10) E Neuroblast: 0.096| (11) PN Sustentacular: 0.103| (12) Cortex ZF: 0.055| (13) Macrophage: 0.048| (14) Cortex ZG: 0.058| (15) Dendritic cell: 0.051| (16) T cell: 0.06…
Npy	(2) PN ADR Chromaffin	6.58929	2.97292e-21	1.13768e-16	0.999	0.710474	(0) E ADR Chromaffin: 2.73726972543316e-119| (1) PN NOR Chromaffin: 7.79081681925368e-45| (3) Endothelial: 1.30280574860102e-230| (4) Macrophage: 2.95420508966514e-222| (5) E NOR Chromaffin: 1.01782457360821e-172| (6) E Glia|SCP: 1.45937096340557e-183| (7) Cortex ZG: 5.16190572250132e-183| (8) Cycling TH+: 9.86604526839054e-107| (9) Cortex X Zone: 3.28011331756021e-160| (10) E Neuroblast: 3.34601…	(0) E ADR Chromaffin: 1.04749837852876e-114| (1) PN NOR Chromaffin: 2.981389780392e-40| (3) Endothelial: 4.98557703874639e-226| (4) Macrophage: 1.13051520371306e-217| (5) E NOR Chromaffin: 3.89501107828391e-168| (6) E Glia|SCP: 5.58472080276043e-179| (7) Cortex ZG: 1.9753580818868e-178| (8) Cycling TH+: 3.77553820330769e-102| (9) Cortex X Zone: 1.25523376436394e-155| (10) E Neuroblast: 1.28045229…	(0) E ADR Chromaffin: 1.01286931974916| (1) PN NOR Chromaffin: 0.592231046538945| (3) Endothelial: 7.79895384101044| (4) Macrophage: 8.72416433492447| (5) E NOR Chromaffin: 2.45903150398963| (6) E Glia|SCP: 8.35180479288143| (7) Cortex ZG: 9.8996493029164| (8) Cycling TH+: 1.70478938597152| (9) Cortex X Zone: 8.33516962409803| (10) E Neuroblast: 2.72490047316378| (11) PN Sustentacular: 7.97192348…	(0) E ADR Chromaffin: 0.999| (1) PN NOR Chromaffin: 0.999| (3) Endothelial: 0.581| (4) Macrophage: 0.657| (5) E NOR Chromaffin: 0.927| (6) E Glia|SCP: 0.553| (7) Cortex ZG: 0.138| (8) Cycling TH+: 0.981| (9) Cortex X Zone: 0.762| (10) E Neuroblast: 0.98| (11) PN Sustentacular: 0.759| (12) Cortex ZF: 0.545| (13) Macrophage: 0.733| (14) Cortex ZG: 0.777| (15) Dendritic cell: 0.657| (16) T cell: 0.7…
Pak3	(2) PN ADR Chromaffin	4.20299	5.72644e-16	2.1914e-11	0.858	0.245368	(0) E ADR Chromaffin: 1.48377810803595e-118| (1) PN NOR Chromaffin: 5.35846349022225e-96| (3) Endothelial: 4.17563373283875e-185| (4) Macrophage: 7.79781313554587e-179| (5) E NOR Chromaffin: 3.48409490828176e-79| (6) E Glia|SCP: 3.28913527459747e-119| (7) Cortex ZG: 3.1054461747937e-53| (8) Cycling TH+: 1.59467566506931e-48| (9) Cortex X Zone: 2.03302387075278e-63| (10) E Neuroblast: 2.9675644270…	(0) E ADR Chromaffin: 5.67812206383197e-114| (1) PN NOR Chromaffin: 2.05057680843825e-91| (3) Endothelial: 1.59793151688273e-180| (4) Macrophage: 2.98406713071069e-174| (5) E NOR Chromaffin: 1.33329343950126e-74| (6) E Glia|SCP: 1.25868628688296e-114| (7) Cortex ZG: 1.18839214217005e-48| (8) Cycling TH+: 6.10250483508723e-44| (9) Cortex X Zone: 7.77997574859673e-59| (10) E Neuroblast: 1.135627554…	(0) E ADR Chromaffin: 2.3680146832612| (1) PN NOR Chromaffin: 1.86483287883908| (3) Endothelial: 6.71885321644294| (4) Macrophage: 8.12324054267739| (5) E NOR Chromaffin: 2.19152281361066| (6) E Glia|SCP: 4.23189683291297| (7) Cortex ZG: 1.80517806127482| (8) Cycling TH+: 1.87256196674436| (9) Cortex X Zone: 2.44907066639668| (10) E Neuroblast: 1.07044145767359| (11) PN Sustentacular: 5.543100696…	(0) E ADR Chromaffin: 0.453| (1) PN NOR Chromaffin: 0.444| (3) Endothelial: 0.039| (4) Macrophage: 0.038| (5) E NOR Chromaffin: 0.384| (6) E Glia|SCP: 0.153| (7) Cortex ZG: 0.466| (8) Cycling TH+: 0.572| (9) Cortex X Zone: 0.418| (10) E Neuroblast: 0.693| (11) PN Sustentacular: 0.107| (12) Cortex ZF: 0.345| (13) Macrophage: 0.095| (14) Cortex ZG: 0.204| (15) Dendritic cell: 0.051| (16) T cell: 0.…
Mat2a	(2) PN ADR Chromaffin	2.28176	2.11291e-17	8.08568e-13	0.995	0.871368	(0) E ADR Chromaffin: 3.78375785839939e-113| (1) PN NOR Chromaffin: 1.17006977704261e-83| (3) Endothelial: 1.95697786855695e-120| (4) Macrophage: 3.78984072930661e-162| (5) E NOR Chromaffin: 3.5267711854258e-133| (6) E Glia|SCP: 1.44877564492137e-161| (7) Cortex ZG: 3.18279889529714e-145| (8) Cycling TH+: 2.19607231920436e-106| (9) Cortex X Zone: 6.39691257059292e-145| (10) E Neuroblast: 9.145502…	(0) E ADR Chromaffin: 1.44796845725228e-108| (1) PN NOR Chromaffin: 4.47762302278665e-79| (3) Endothelial: 7.48896290739374e-116| (4) Macrophage: 1.45029625029105e-157| (5) E NOR Chromaffin: 1.34962479723875e-128| (6) E Glia|SCP: 5.54417463798509e-157| (7) Cortex ZG: 1.21799348125231e-140| (8) Cycling TH+: 8.40392955113123e-102| (9) Cortex X Zone: 2.4479705025145e-140| (10) E Neuroblast: 3.499801…	(0) E ADR Chromaffin: 1.09757287095373| (1) PN NOR Chromaffin: 0.922766189697283| (3) Endothelial: 1.58354748874732| (4) Macrophage: 2.21022443868404| (5) E NOR Chromaffin: 1.84800402573391| (6) E Glia|SCP: 2.97975146064208| (7) Cortex ZG: 2.49118200544028| (8) Cycling TH+: 1.73516609201431| (9) Cortex X Zone: 3.12208088989333| (10) E Neuroblast: 2.21157964956885| (11) PN Sustentacular: 1.8763798…	(0) E ADR Chromaffin: 0.991| (1) PN NOR Chromaffin: 0.992| (3) Endothelial: 0.892| (4) Macrophage: 0.889| (5) E NOR Chromaffin: 0.959| (6) E Glia|SCP: 0.874| (7) Cortex ZG: 0.907| (8) Cycling TH+: 0.976| (9) Cortex X Zone: 0.938| (10) E Neuroblast: 0.928| (11) PN Sustentacular: 0.902| (12) Cortex ZF: 0.782| (13) Macrophage: 0.886| (14) Cortex ZG: 0.893| (15) Dendritic cell: 0.768| (16) T cell: 0.…
Bmyc	(2) PN ADR Chromaffin	2.70086	1.70998e-14	6.54374e-10	0.947	0.554105	(0) E ADR Chromaffin: 9.91490157817046e-108| (1) PN NOR Chromaffin: 1.29124208950753e-137| (3) Endothelial: 1.30902611322057e-156| (4) Macrophage: 5.86827831040468e-148| (5) E NOR Chromaffin: 1.71828055278398e-118| (6) E Glia|SCP: 9.52886222701783e-121| (7) Cortex ZG: 2.82933602347555e-142| (8) Cycling TH+: 1.59414847103219e-97| (9) Cortex X Zone: 2.52368353100616e-75| (10) E Neuroblast: 1.448367…	(0) E ADR Chromaffin: 3.79423453593427e-103| (1) PN NOR Chromaffin: 4.94132522812743e-133| (3) Endothelial: 5.00938113007249e-152| (4) Macrophage: 2.24567274382566e-143| (5) E NOR Chromaffin: 6.57551601939372e-114| (6) E Glia|SCP: 3.64650499703518e-116| (7) Cortex ZG: 1.08273030946362e-137| (8) Cycling TH+: 6.10048736894597e-93| (9) Cortex X Zone: 9.65763213645436e-71| (10) E Neuroblast: 5.542612…	(0) E ADR Chromaffin: 1.48094083139924| (1) PN NOR Chromaffin: 1.93957685135912| (3) Endothelial: 2.85839279583853| (4) Macrophage: 2.80743564892027| (5) E NOR Chromaffin: 2.31312395857351| (6) E Glia|SCP: 2.7559483627473| (7) Cortex ZG: 3.83068861270449| (8) Cycling TH+: 2.29623960110382| (9) Cortex X Zone: 1.86246391744385| (10) E Neuroblast: 2.18093183895452| (11) PN Sustentacular: 2.772651064…	(0) E ADR Chromaffin: 0.905| (1) PN NOR Chromaffin: 0.805| (3) Endothelial: 0.369| (4) Macrophage: 0.51| (5) E NOR Chromaffin: 0.738| (6) E Glia|SCP: 0.495| (7) Cortex ZG: 0.351| (8) Cycling TH+: 0.714| (9) Cortex X Zone: 0.859| (10) E Neuroblast: 0.749| (11) PN Sustentacular: 0.371| (12) Cortex ZF: 0.518| (13) Macrophage: 0.562| (14) Cortex ZG: 0.718| (15) Dendritic cell: 0.455| (16) T cell: 0.1…
Pld3	(2) PN ADR Chromaffin	2.55682	4.94758e-21	1.89334e-16	0.993	0.714895	(0) E ADR Chromaffin: 9.89721207254015e-105| (1) PN NOR Chromaffin: 1.16929448939528e-37| (3) Endothelial: 8.25346007121974e-192| (4) Macrophage: 8.83785727162676e-155| (5) E NOR Chromaffin: 9.09853766796799e-97| (6) E Glia|SCP: 1.79773989002327e-148| (7) Cortex ZG: 6.98747001733109e-126| (8) Cycling TH+: 8.58684955917178e-117| (9) Cortex X Zone: 2.18415272673689e-139| (10) E Neuroblast: 1.524845…	(0) E ADR Chromaffin: 3.78746511591966e-100| (1) PN NOR Chromaffin: 4.47465615201786e-33| (3) Endothelial: 3.15843410005437e-187| (4) Macrophage: 3.38207122070613e-150| (5) E NOR Chromaffin: 3.48182839477799e-92| (6) E Glia|SCP: 6.87959101114106e-144| (7) Cortex ZG: 2.67396502623226e-121| (8) Cycling TH+: 3.28601558930386e-112| (9) Cortex X Zone: 8.35831565467673e-135| (10) E Neuroblast: 5.835276…	(0) E ADR Chromaffin: 1.068959146145| (1) PN NOR Chromaffin: 0.57096429616046| (3) Endothelial: 3.12988116541674| (4) Macrophage: 2.26743224672374| (5) E NOR Chromaffin: 1.41591057062258| (6) E Glia|SCP: 2.67558587854676| (7) Cortex ZG: 2.10605346030233| (8) Cycling TH+: 2.09596375343322| (9) Cortex X Zone: 3.04754261381003| (10) E Neuroblast: 2.40255679726765| (11) PN Sustentacular: 2.7900561361…	(0) E ADR Chromaffin: 0.963| (1) PN NOR Chromaffin: 0.979| (3) Endothelial: 0.49| (4) Macrophage: 0.68| (5) E NOR Chromaffin: 0.89| (6) E Glia|SCP: 0.706| (7) Cortex ZG: 0.895| (8) Cycling TH+: 0.816| (9) Cortex X Zone: 0.782| (10) E Neuroblast: 0.797| (11) PN Sustentacular: 0.594| (12) Cortex ZF: 0.855| (13) Macrophage: 0.914| (14) Cortex ZG: 0.893| (15) Dendritic cell: 0.283| (16) T cell: 0.568…
Stac2	(2) PN ADR Chromaffin	5.09508	3.74187e-10	1.43194e-05	0.609	0.0474211	(0) E ADR Chromaffin: 4.80529541264105e-98| (1) PN NOR Chromaffin: 9.12561611359453e-62| (3) Endothelial: 5.62419281969169e-113| (4) Macrophage: 2.30078358431323e-109| (5) E NOR Chromaffin: 1.49471894924273e-77| (6) E Glia|SCP: 4.83473191405189e-86| (7) Cortex ZG: 1.32183432030215e-82| (8) Cycling TH+: 6.03940079930061e-63| (9) Cortex X Zone: 1.05022774322795e-71| (10) E Neuroblast: 7.88087634763…	(0) E ADR Chromaffin: 1.83889044850948e-93| (1) PN NOR Chromaffin: 3.49219077435035e-57| (3) Endothelial: 2.15226610823962e-108| (4) Macrophage: 8.80463862044986e-105| (5) E NOR Chromaffin: 5.7199904749621e-73| (6) E Glia|SCP: 1.85015520886938e-81| (7) Cortex ZG: 5.05839557693225e-78| (8) Cycling TH+: 2.31115789787636e-58| (9) Cortex X Zone: 4.01901152778471e-67| (10) E Neuroblast: 3.015853760713…	(0) E ADR Chromaffin: 2.77737729218173| (1) PN NOR Chromaffin: 1.91595556002067| (3) Endothelial: 5.26858372388529| (4) Macrophage: 8.19429891429625| (5) E NOR Chromaffin: 3.7381633492974| (6) E Glia|SCP: 7.87137521584645| (7) Cortex ZG: 6.80303452338749| (8) Cycling TH+: 4.42896733074135| (9) Cortex X Zone: 7.77886347783015| (10) E Neuroblast: 5.73028239393822| (11) PN Sustentacular: 5.549493189…	(0) E ADR Chromaffin: 0.153| (1) PN NOR Chromaffin: 0.228| (3) Endothelial: 0.01| (4) Macrophage: 0.007| (5) E NOR Chromaffin: 0.079| (6) E Glia|SCP: 0.002| (7) Cortex ZG: 0.008| (8) Cycling TH+: 0.091| (9) Cortex X Zone: 0.018| (10) E Neuroblast: 0.032| (11) PN Sustentacular: 0.027| (12) Cortex ZF: 0.145| (13) Macrophage: 0.019| (14) Cortex ZG: 0.039| (15) Dendritic cell: 0.03| (16) T cell: 0| (…
Taf9b	(2) PN ADR Chromaffin	3.53633	1.04294e-13	3.99111e-09	0.84	0.284421	(0) E ADR Chromaffin: 4.71929544816792e-88| (1) PN NOR Chromaffin: 1.24539925244254e-104| (3) Endothelial: 2.47699948705835e-105| (4) Macrophage: 3.99597192893651e-157| (5) E NOR Chromaffin: 1.01106346673744e-113| (6) E Glia|SCP: 1.92167806201257e-125| (7) Cortex ZG: 2.47950778535003e-84| (8) Cycling TH+: 8.20211576677788e-70| (9) Cortex X Zone: 1.46729341171481e-93| (10) E Neuroblast: 5.81277216…	(0) E ADR Chromaffin: 1.8059799821049e-83| (1) PN NOR Chromaffin: 4.7658938592471e-100| (3) Endothelial: 9.47898163707488e-101| (4) Macrophage: 1.52917853776543e-152| (5) E NOR Chromaffin: 3.86913767451085e-109| (6) E Glia|SCP: 7.35387760770969e-121| (7) Cortex ZG: 9.4885803929775e-80| (8) Cycling TH+: 3.13878566163056e-65| (9) Cortex X Zone: 5.61503842795022e-89| (10) E Neuroblast: 2.22443165019…	(0) E ADR Chromaffin: 1.90270873459812| (1) PN NOR Chromaffin: 2.53808769805238| (3) Endothelial: 2.46825627899413| (4) Macrophage: 5.59392063844997| (5) E NOR Chromaffin: 3.81005450892414| (6) E Glia|SCP: 5.35076184199016| (7) Cortex ZG: 2.9890430447971| (8) Cycling TH+: 2.68135110471101| (9) Cortex X Zone: 4.2979240577895| (10) E Neuroblast: 4.1880847200447| (11) PN Sustentacular: 3.06348708493…	(0) E ADR Chromaffin: 0.543| (1) PN NOR Chromaffin: 0.548| (3) Endothelial: 0.269| (4) Macrophage: 0.12| (5) E NOR Chromaffin: 0.303| (6) E Glia|SCP: 0.112| (7) Cortex ZG: 0.331| (8) Cycling TH+: 0.46| (9) Cortex X Zone: 0.279| (10) E Neuroblast: 0.247| (11) PN Sustentacular: 0.205| (12) Cortex ZF: 0.491| (13) Macrophage: 0.162| (14) Cortex ZG: 0.398| (15) Dendritic cell: 0.101| (16) T cell: 0.13…
Grin1	(2) PN ADR Chromaffin	5.09389	5.67554e-11	2.17192e-06	0.82	0.129211	(0) E ADR Chromaffin: 4.92354207047519e-87| (1) PN NOR Chromaffin: 1.07828552721319e-09| (3) Endothelial: 1.48563123110649e-175| (4) Macrophage: 1.20747404071874e-168| (5) E NOR Chromaffin: 6.3417253819609e-81| (6) E Glia|SCP: 3.81959192338217e-135| (7) Cortex ZG: 2.6474106817541e-131| (8) Cycling TH+: 5.02654274284234e-75| (9) Cortex X Zone: 3.2956718160783e-115| (10) E Neuroblast: 1.23888095587…	(0) E ADR Chromaffin: 1.88414107952944e-82| (1) PN NOR Chromaffin: 4.12638305553942e-05| (3) Endothelial: 5.68521359519831e-171| (4) Macrophage: 4.62076165902247e-164| (5) E NOR Chromaffin: 2.4268514691688e-76| (6) E Glia|SCP: 1.46168143723989e-130| (7) Cortex ZG: 1.01311111969366e-126| (8) Cycling TH+: 1.9235573768309e-70| (9) Cortex X Zone: 1.26118769057684e-110| (10) E Neuroblast: 4.7409496419…	(0) E ADR Chromaffin: 1.75782670840385| (1) PN NOR Chromaffin: 0.530500125229434| (3) Endothelial: 6.30312225131444| (4) Macrophage: 7.84534269850646| (5) E NOR Chromaffin: 2.26110502927216| (6) E Glia|SCP: 7.93673293345568| (7) Cortex ZG: 7.58300856941812| (8) Cycling TH+: 2.67203624718369| (9) Cortex X Zone: 7.81285429367208| (10) E Neuroblast: 2.47921913287094| (11) PN Sustentacular: 5.1060404…	(0) E ADR Chromaffin: 0.457| (1) PN NOR Chromaffin: 0.795| (3) Endothelial: 0.02| (4) Macrophage: 0.02| (5) E NOR Chromaffin: 0.315| (6) E Glia|SCP: 0.007| (7) Cortex ZG: 0.01| (8) Cycling TH+: 0.307| (9) Cortex X Zone: 0.024| (10) E Neuroblast: 0.267| (11) PN Sustentacular: 0.054| (12) Cortex ZF: 0.018| (13) Macrophage: 0.01| (14) Cortex ZG: 0.058| (15) Dendritic cell: 0.02| (16) T cell: 0.011| …
Faim2	(2) PN ADR Chromaffin	5.9732	7.69829e-20	2.94598e-15	0.961	0.179368	(0) E ADR Chromaffin: 5.35815545109686e-80| (1) PN NOR Chromaffin: 4.03219204479929e-209| (3) Endothelial: 1.51302298406326e-225| (4) Macrophage: 1.63834650117224e-215| (5) E NOR Chromaffin: 9.51276666618009e-173| (6) E Glia|SCP: 2.25304126336682e-175| (7) Cortex ZG: 8.83993706024994e-172| (8) Cycling TH+: 2.17019556394804e-131| (9) Cortex X Zone: 2.33541772459249e-151| (10) E Neuroblast: 8.79132…	(0) E ADR Chromaffin: 2.05045892802575e-75| (1) PN NOR Chromaffin: 1.54303925170379e-204| (3) Endothelial: 5.79003635541328e-221| (4) Macrophage: 6.26962439068592e-211| (5) E NOR Chromaffin: 3.6403455478138e-168| (6) E Glia|SCP: 8.62193830665216e-171| (7) Cortex ZG: 3.38286711421645e-167| (8) Cycling TH+: 8.30490438411635e-127| (9) Cortex X Zone: 8.93717654847053e-147| (10) E Neuroblast: 3.364262…	(0) E ADR Chromaffin: 0.951779700131467| (1) PN NOR Chromaffin: 2.8047395377438| (3) Endothelial: 7.56695370050655| (4) Macrophage: 7.35172703532142| (5) E NOR Chromaffin: 3.76722647112512| (6) E Glia|SCP: 9.14174185955932| (7) Cortex ZG: 8.38534279216191| (8) Cycling TH+: 3.04340690270747| (9) Cortex X Zone: 8.11218581035954| (10) E Neuroblast: 1.80011738719469| (11) PN Sustentacular: 6.74885736…	(0) E ADR Chromaffin: 0.885| (1) PN NOR Chromaffin: 0.433| (3) Endothelial: 0.076| (4) Macrophage: 0.07| (5) E NOR Chromaffin: 0.205| (6) E Glia|SCP: 0.049| (7) Cortex ZG: 0.023| (8) Cycling TH+: 0.414| (9) Cortex X Zone: 0.065| (10) E Neuroblast: 0.622| (11) PN Sustentacular: 0.098| (12) Cortex ZF: 0.036| (13) Macrophage: 0.095| (14) Cortex ZG: 0.049| (15) Dendritic cell: 0.061| (16) T cell: 0.0…
Tmem130	(2) PN ADR Chromaffin	6.34259	8.83406e-20	3.38062e-15	0.957	0.215053	(0) E ADR Chromaffin: 1.2820821247429e-76| (1) PN NOR Chromaffin: 7.40343268551424e-88| (3) Endothelial: 9.4486631802768e-226| (4) Macrophage: 5.73309563879021e-214| (5) E NOR Chromaffin: 2.13413816763364e-133| (6) E Glia|SCP: 1.78048978305886e-173| (7) Cortex ZG: 1.20427381245152e-169| (8) Cycling TH+: 1.59166061374772e-114| (9) Cortex X Zone: 3.12324526124609e-150| (10) E Neuroblast: 2.72686666…	(0) E ADR Chromaffin: 4.90627187496611e-72| (1) PN NOR Chromaffin: 2.83314562009259e-83| (3) Endothelial: 3.61581442582833e-221| (4) Macrophage: 2.19394103905224e-209| (5) E NOR Chromaffin: 8.1669199399004e-129| (6) E Glia|SCP: 6.81357830180966e-169| (7) Cortex ZG: 4.60851502548949e-165| (8) Cycling TH+: 6.09096683668976e-110| (9) Cortex X Zone: 1.19520349657365e-145| (10) E Neuroblast: 1.0435173…	(0) E ADR Chromaffin: 1.06808985478681| (1) PN NOR Chromaffin: 1.24554456943898| (3) Endothelial: 8.34201366001041| (4) Macrophage: 7.38807111665291| (5) E NOR Chromaffin: 2.5796841474355| (6) E Glia|SCP: 9.18265730252477| (7) Cortex ZG: 7.7911885192187| (8) Cycling TH+: 2.6849843243125| (9) Cortex X Zone: 8.28229001149033| (10) E Neuroblast: 1.96254121969061| (11) PN Sustentacular: 7.20207218478…	(0) E ADR Chromaffin: 0.862| (1) PN NOR Chromaffin: 0.729| (3) Endothelial: 0.051| (4) Macrophage: 0.061| (5) E NOR Chromaffin: 0.459| (6) E Glia|SCP: 0.066| (7) Cortex ZG: 0.03| (8) Cycling TH+: 0.543| (9) Cortex X Zone: 0.056| (10) E Neuroblast: 0.681| (11) PN Sustentacular: 0.094| (12) Cortex ZF: 0.036| (13) Macrophage: 0.067| (14) Cortex ZG: 0.097| (15) Dendritic cell: 0.061| (16) T cell: 0.0…
Ndrg4	(2) PN ADR Chromaffin	4.51369	9.48277e-19	3.62887e-14	0.937	0.271632	(0) E ADR Chromaffin: 6.27454936577934e-75| (1) PN NOR Chromaffin: 4.62888989409005e-56| (3) Endothelial: 1.88707869510087e-207| (4) Macrophage: 5.01647072884022e-205| (5) E NOR Chromaffin: 4.55995455059834e-100| (6) E Glia|SCP: 9.7240834451009e-135| (7) Cortex ZG: 2.74480706614495e-148| (8) Cycling TH+: 2.58523597863027e-87| (9) Cortex X Zone: 1.06410959810329e-143| (10) E Neuroblast: 1.42215252…	(0) E ADR Chromaffin: 2.40114455129644e-70| (1) PN NOR Chromaffin: 1.77138358467038e-51| (3) Endothelial: 7.22147275041202e-203| (4) Macrophage: 1.91970301851257e-200| (5) E NOR Chromaffin: 1.74500340742297e-95| (6) E Glia|SCP: 3.72121225277121e-130| (7) Cortex ZG: 1.05038276807235e-143| (8) Cycling TH+: 9.89318104302233e-83| (9) Cortex X Zone: 4.07213461002165e-139| (10) E Neuroblast: 5.44229328…	(0) E ADR Chromaffin: 1.21884691005229| (1) PN NOR Chromaffin: 1.0588627383395| (3) Endothelial: 5.51617896058524| (4) Macrophage: 6.88813479581368| (5) E NOR Chromaffin: 2.11813159981833| (6) E Glia|SCP: 3.58896700720699| (7) Cortex ZG: 4.51809780839097| (8) Cycling TH+: 2.22737809579282| (9) Cortex X Zone: 7.67744656746962| (10) E Neuroblast: 0.984068964044198| (11) PN Sustentacular: 4.15556638…	(0) E ADR Chromaffin: 0.786| (1) PN NOR Chromaffin: 0.814| (3) Endothelial: 0.079| (4) Macrophage: 0.054| (5) E NOR Chromaffin: 0.569| (6) E Glia|SCP: 0.25| (7) Cortex ZG: 0.103| (8) Cycling TH+: 0.583| (9) Cortex X Zone: 0.056| (10) E Neuroblast: 0.745| (11) PN Sustentacular: 0.138| (12) Cortex ZF: 0.073| (13) Macrophage: 0.086| (14) Cortex ZG: 0.456| (15) Dendritic cell: 0.061| (16) T cell: 0.0…
Fbxo2	(2) PN ADR Chromaffin	3.84107	2.90394e-08	0.00111128	0.509	0.0658421	(0) E ADR Chromaffin: 3.27369685031071e-66| (1) PN NOR Chromaffin: 5.03348893506794e-26| (3) Endothelial: 2.34058969930932e-88| (4) Macrophage: 1.28226874867109e-80| (5) E NOR Chromaffin: 1.37956248412244e-57| (6) E Glia|SCP: 1.04760590638142e-59| (7) Cortex ZG: 7.81920009399696e-55| (8) Cycling TH+: 2.72461721109519e-37| (9) Cortex X Zone: 5.25763837647791e-54| (10) E Neuroblast: 2.5796520490138…	(0) E ADR Chromaffin: 1.2527783106769e-61| (1) PN NOR Chromaffin: 1.9262155456718e-21| (3) Endothelial: 8.95696866131691e-84| (4) Macrophage: 4.90698604741452e-76| (5) E NOR Chromaffin: 5.27930971423975e-53| (6) E Glia|SCP: 4.00897828254042e-55| (7) Cortex ZG: 2.99225149197076e-50| (8) Cycling TH+: 1.04265651434191e-32| (9) Cortex X Zone: 2.01199305391057e-49| (10) E Neuroblast: 9.87181246116607e…	(0) E ADR Chromaffin: 2.23938071655268| (1) PN NOR Chromaffin: 1.3668615058113| (3) Endothelial: 5.9609990292431| (4) Macrophage: 5.47803003926682| (5) E NOR Chromaffin: 3.24598560934747| (6) E Glia|SCP: 4.18593071298822| (7) Cortex ZG: 4.05222262590819| (8) Cycling TH+: 2.61263910356004| (9) Cortex X Zone: 5.27134420473911| (10) E Neuroblast: 4.73835452067294| (11) PN Sustentacular: 2.2525125337…	(0) E ADR Chromaffin: 0.152| (1) PN NOR Chromaffin: 0.293| (3) Endothelial: 0.012| (4) Macrophage: 0.023| (5) E NOR Chromaffin: 0.071| (6) E Glia|SCP: 0.029| (7) Cortex ZG: 0.05| (8) Cycling TH+: 0.134| (9) Cortex X Zone: 0.018| (10) E Neuroblast: 0.016| (11) PN Sustentacular: 0.103| (12) Cortex ZF: 0.227| (13) Macrophage: 0.01| (14) Cortex ZG: 0.049| (15) Dendritic cell: 0.01| (16) T cell: 0| (1…
Gng4	(2) PN ADR Chromaffin	5.208	3.10416e-18	1.1879e-13	0.912	0.199158	(0) E ADR Chromaffin: 1.94204694667707e-61| (1) PN NOR Chromaffin: 1.60943793920268e-77| (3) Endothelial: 1.67708609292787e-208| (4) Macrophage: 2.06622227306094e-197| (5) E NOR Chromaffin: 1.66669853921349e-104| (6) E Glia|SCP: 4.25543047373346e-157| (7) Cortex ZG: 1.11893989267672e-156| (8) Cycling TH+: 7.31458739837072e-78| (9) Cortex X Zone: 2.56232536827891e-137| (10) E Neuroblast: 1.8034485…	(0) E ADR Chromaffin: 7.43182525554383e-57| (1) PN NOR Chromaffin: 6.1589971057408e-73| (3) Endothelial: 6.41787306041639e-204| (4) Macrophage: 7.90701939454961e-193| (5) E NOR Chromaffin: 6.37812196986218e-100| (6) E Glia|SCP: 1.62846813368832e-152| (7) Cortex ZG: 4.28195918129529e-152| (8) Cycling TH+: 2.79914630560851e-73| (9) Cortex X Zone: 9.80550671932975e-133| (10) E Neuroblast: 6.90143675…	(0) E ADR Chromaffin: 1.05764482991584| (1) PN NOR Chromaffin: 1.30644413037489| (3) Endothelial: 7.47859470476095| (4) Macrophage: 6.64153277583375| (5) E NOR Chromaffin: 2.27677359344926| (6) E Glia|SCP: 6.43433573000223| (7) Cortex ZG: 8.24940099682935| (8) Cycling TH+: 2.06557901188496| (9) Cortex X Zone: 7.5962452393854| (10) E Neuroblast: 1.29879850866613| (11) PN Sustentacular: 5.765173700…	(0) E ADR Chromaffin: 0.808| (1) PN NOR Chromaffin: 0.717| (3) Endothelial: 0.029| (4) Macrophage: 0.034| (5) E NOR Chromaffin: 0.476| (6) E Glia|SCP: 0.036| (7) Cortex ZG: 0.018| (8) Cycling TH+: 0.586| (9) Cortex X Zone: 0.038| (10) E Neuroblast: 0.622| (11) PN Sustentacular: 0.076| (12) Cortex ZF: 0.036| (13) Macrophage: 0.029| (14) Cortex ZG: 0.019| (15) Dendritic cell: 0.091| (16) T cell: 0.…
Slc7a8	(2) PN ADR Chromaffin	3.85252	2.5103e-08	0.00096064	0.963	0.407632	(0) E ADR Chromaffin: 3.22423630626231e-48| (1) PN NOR Chromaffin: 3.14442162604264e-108| (3) Endothelial: 1.21658738201015e-223| (4) Macrophage: 3.90909448518719e-92| (5) E NOR Chromaffin: 2.5778781625586e-120| (6) E Glia|SCP: 8.10482603370186e-171| (7) Cortex ZG: 2.71198588271047e-164| (8) Cycling TH+: 1.4007394515455e-75| (9) Cortex X Zone: 1.54111377257643e-48| (10) E Neuroblast: 1.6340050967…	(0) E ADR Chromaffin: 1.23385074968046e-43| (1) PN NOR Chromaffin: 1.203307267854e-103| (3) Endothelial: 4.65563659347645e-219| (4) Macrophage: 1.49593227759143e-87| (5) E NOR Chromaffin: 9.86502415247925e-116| (6) E Glia|SCP: 3.10155482657703e-166| (7) Cortex ZG: 1.03782275759564e-159| (8) Cycling TH+: 5.36034973317432e-71| (9) Cortex X Zone: 5.89753418489547e-44| (10) E Neuroblast: 6.2530107044…	(0) E ADR Chromaffin: 0.796592259236073| (1) PN NOR Chromaffin: 1.45650837212906| (3) Endothelial: 6.93639358694752| (4) Macrophage: 1.61754353784086| (5) E NOR Chromaffin: 2.22562847643446| (6) E Glia|SCP: 6.2401422855656| (7) Cortex ZG: 5.48835914784028| (8) Cycling TH+: 1.3459109204946| (9) Cortex X Zone: 1.21741198659619| (10) E Neuroblast: 3.39451981366559| (11) PN Sustentacular: 6.144673603…	(0) E ADR Chromaffin: 0.932| (1) PN NOR Chromaffin: 0.893| (3) Endothelial: 0.086| (4) Macrophage: 0.693| (5) E NOR Chromaffin: 0.624| (6) E Glia|SCP: 0.107| (7) Cortex ZG: 0.093| (8) Cycling TH+: 0.671| (9) Cortex X Zone: 0.882| (10) E Neuroblast: 0.462| (11) PN Sustentacular: 0.121| (12) Cortex ZF: 0.245| (13) Macrophage: 0.962| (14) Cortex ZG: 0.184| (15) Dendritic cell: 0.202| (16) T cell: 0.…
Dgkb	(2) PN ADR Chromaffin	4.68283	5.0819e-16	1.94474e-11	0.852	0.185474	(0) E ADR Chromaffin: 3.72096870100767e-45| (1) PN NOR Chromaffin: 2.982886199787e-38| (3) Endothelial: 8.37737342567345e-180| (4) Macrophage: 9.12639349759343e-178| (5) E NOR Chromaffin: 1.65576298459363e-24| (6) E Glia|SCP: 1.36507588726679e-136| (7) Cortex ZG: 1.65699043599852e-138| (8) Cycling TH+: 6.67683764277219e-54| (9) Cortex X Zone: 1.00945478222131e-119| (10) E Neuroblast: 1.0989666553…	(0) E ADR Chromaffin: 1.42394030250161e-40| (1) PN NOR Chromaffin: 1.14149089093449e-33| (3) Endothelial: 3.20585326253672e-175| (4) Macrophage: 3.49248826365905e-173| (5) E NOR Chromaffin: 6.3362737894429e-20| (6) E Glia|SCP: 5.22387240539256e-132| (7) Cortex ZG: 6.34097100047912e-134| (8) Cycling TH+: 2.55509222913606e-49| (9) Cortex X Zone: 3.86298156060452e-115| (10) E Neuroblast: 4.205525596…	(0) E ADR Chromaffin: 1.05323248848264| (1) PN NOR Chromaffin: 0.967342779784983| (3) Endothelial: 6.11653869842382| (4) Macrophage: 8.48102620414721| (5) E NOR Chromaffin: 0.658833606218164| (6) E Glia|SCP: 5.9999752962148| (7) Cortex ZG: 7.73602235928932| (8) Cycling TH+: 1.84076952767159| (9) Cortex X Zone: 7.21186131831528| (10) E Neuroblast: 1.44687404582742| (11) PN Sustentacular: 4.4009940…	(0) E ADR Chromaffin: 0.639| (1) PN NOR Chromaffin: 0.642| (3) Endothelial: 0.049| (4) Macrophage: 0.031| (5) E NOR Chromaffin: 0.569| (6) E Glia|SCP: 0.051| (7) Cortex ZG: 0.02| (8) Cycling TH+: 0.468| (9) Cortex X Zone: 0.05| (10) E Neuroblast: 0.414| (11) PN Sustentacular: 0.094| (12) Cortex ZF: 0.064| (13) Macrophage: 0.076| (14) Cortex ZG: 0.068| (15) Dendritic cell: 0.02| (16) T cell: 0.034…
Cplx2	(2) PN ADR Chromaffin	4.45303	1.00821e-20	3.85821e-16	0.986	0.428211	(0) E ADR Chromaffin: 1.75310128660968e-44| (1) PN NOR Chromaffin: 1.88105388084103e-210| (3) Endothelial: 6.69127586386147e-221| (4) Macrophage: 8.18123544679888e-225| (5) E NOR Chromaffin: 2.34421580209859e-133| (6) E Glia|SCP: 5.04656957663752e-166| (7) Cortex ZG: 4.85360570445623e-163| (8) Cycling TH+: 4.53025753713584e-63| (9) Cortex X Zone: 2.85673903647001e-145| (10) E Neuroblast: 1.855900…	(0) E ADR Chromaffin: 6.70876800359794e-40| (1) PN NOR Chromaffin: 7.19841699120247e-206| (3) Endothelial: 2.56061744758251e-216| (4) Macrophage: 3.13079518078099e-220| (5) E NOR Chromaffin: 8.97084503147087e-129| (6) E Glia|SCP: 1.93122124558764e-161| (7) Cortex ZG: 1.85737783098131e-158| (8) Cycling TH+: 1.73363895431114e-58| (9) Cortex X Zone: 1.09321689447634e-140| (10) E Neuroblast: 7.102161…	(0) E ADR Chromaffin: 0.645325216034809| (1) PN NOR Chromaffin: 2.64717235580723| (3) Endothelial: 4.97191538247843| (4) Macrophage: 7.9076000777649| (5) E NOR Chromaffin: 2.28687132735463| (6) E Glia|SCP: 4.19889396940495| (7) Cortex ZG: 4.33666966672174| (8) Cycling TH+: 1.27080043253126| (9) Cortex X Zone: 4.21711524463614| (10) E Neuroblast: 1.04427452422595| (11) PN Sustentacular: 4.34484000…	(0) E ADR Chromaffin: 0.991| (1) PN NOR Chromaffin: 0.739| (3) Endothelial: 0.221| (4) Macrophage: 0.117| (5) E NOR Chromaffin: 0.715| (6) E Glia|SCP: 0.444| (7) Cortex ZG: 0.381| (8) Cycling TH+: 0.885| (9) Cortex X Zone: 0.588| (10) E Neuroblast: 0.88| (11) PN Sustentacular: 0.326| (12) Cortex ZF: 0.382| (13) Macrophage: 0.2| (14) Cortex ZG: 0.505| (15) Dendritic cell: 0.182| (16) T cell: 0.125…
Rcn2	(2) PN ADR Chromaffin	1.9053	2.90437e-15	1.11144e-10	0.985	0.709789	(0) E ADR Chromaffin: 7.57223494750764e-42| (1) PN NOR Chromaffin: 1.57430388229107e-96| (3) Endothelial: 2.9511498755908e-109| (4) Macrophage: 6.6444021833155e-187| (5) E NOR Chromaffin: 5.0327582118123e-122| (6) E Glia|SCP: 4.20592265610079e-109| (7) Cortex ZG: 3.51786951353212e-106| (8) Cycling TH+: 7.40536101911495e-39| (9) Cortex X Zone: 9.97556783567431e-141| (10) E Neuroblast: 1.0922408538…	(0) E ADR Chromaffin: 2.89774286971222e-37| (1) PN NOR Chromaffin: 6.02454609675148e-92| (3) Endothelial: 1.12934603439109e-104| (4) Macrophage: 2.54267982751118e-182| (5) E NOR Chromaffin: 1.92593591249633e-117| (6) E Glia|SCP: 1.60952248203665e-104| (7) Cortex ZG: 1.34621830543847e-101| (8) Cycling TH+: 2.83388355479491e-34| (9) Cortex X Zone: 3.81745029935585e-136| (10) E Neuroblast: 4.1797872…	(0) E ADR Chromaffin: 0.531554870714643| (1) PN NOR Chromaffin: 0.940307710453461| (3) Endothelial: 1.53107655736152| (4) Macrophage: 3.1036239765248| (5) E NOR Chromaffin: 1.52029387543076| (6) E Glia|SCP: 1.5841516007371| (7) Cortex ZG: 1.5967836157972| (8) Cycling TH+: 0.719216407686399| (9) Cortex X Zone: 3.0067757579299| (10) E Neuroblast: 1.290444525454| (11) PN Sustentacular: 1.47271319478…	(0) E ADR Chromaffin: 0.98| (1) PN NOR Chromaffin: 0.961| (3) Endothelial: 0.606| (4) Macrophage: 0.442| (5) E NOR Chromaffin: 0.929| (6) E Glia|SCP: 0.857| (7) Cortex ZG: 0.852| (8) Cycling TH+: 0.968| (9) Cortex X Zone: 0.718| (10) E Neuroblast: 0.916| (11) PN Sustentacular: 0.71| (12) Cortex ZF: 0.755| (13) Macrophage: 0.581| (14) Cortex ZG: 0.835| (15) Dendritic cell: 0.313| (16) T cell: 0.35…
Mgat4c	(2) PN ADR Chromaffin	4.76939	2.87396e-19	1.09981e-14	0.944	0.255632	(0) E ADR Chromaffin: 9.20926670411717e-34| (1) PN NOR Chromaffin: 6.29612724869549e-70| (3) Endothelial: 1.53066157901603e-222| (4) Macrophage: 4.16531015812726e-210| (5) E NOR Chromaffin: 1.8133278050126e-107| (6) E Glia|SCP: 1.10232840536539e-146| (7) Cortex ZG: 2.58370024119851e-162| (8) Cycling TH+: 4.52076157581539e-41| (9) Cortex X Zone: 1.51708365325002e-112| (10) E Neuroblast: 6.33184797…	(0) E ADR Chromaffin: 3.52420218233156e-29| (1) PN NOR Chromaffin: 2.40940197553079e-65| (3) Endothelial: 5.85753573057855e-218| (4) Macrophage: 1.59398089131214e-205| (5) E NOR Chromaffin: 6.93924284422223e-103| (6) E Glia|SCP: 4.21839034165228e-142| (7) Cortex ZG: 9.88730408301845e-158| (8) Cycling TH+: 1.73000503983303e-36| (9) Cortex X Zone: 5.80557572425717e-108| (10) E Neuroblast: 2.4230715…	(0) E ADR Chromaffin: 0.667959286697505| (1) PN NOR Chromaffin: 1.08619309636198| (3) Endothelial: 8.19129818119033| (4) Macrophage: 7.11944044172168| (5) E NOR Chromaffin: 2.13409882813651| (6) E Glia|SCP: 3.91565434987951| (7) Cortex ZG: 6.0760338895178| (8) Cycling TH+: 1.1008619581198| (9) Cortex X Zone: 2.5879464817097| (10) E Neuroblast: 1.19681725953004| (11) PN Sustentacular: 6.3003332211…	(0) E ADR Chromaffin: 0.958| (1) PN NOR Chromaffin: 0.816| (3) Endothelial: 0.025| (4) Macrophage: 0.038| (5) E NOR Chromaffin: 0.581| (6) E Glia|SCP: 0.187| (7) Cortex ZG: 0.048| (8) Cycling TH+: 0.832| (9) Cortex X Zone: 0.2| (10) E Neuroblast: 0.757| (11) PN Sustentacular: 0.098| (12) Cortex ZF: 0.018| (13) Macrophage: 0.086| (14) Cortex ZG: 0.039| (15) Dendritic cell: 0.02| (16) T cell: 0.034…
Zcchc16	(2) PN ADR Chromaffin	5.46319	8.00768e-10	3.06438e-05	0.593	0.0564211	(0) E ADR Chromaffin: 3.77929439468371e-32| (1) PN NOR Chromaffin: 2.75313425488096e-85| (3) Endothelial: 6.06543099363364e-112| (4) Macrophage: 1.305825058109e-102| (5) E NOR Chromaffin: 6.10819275817431e-64| (6) E Glia|SCP: 2.85990606610559e-81| (7) Cortex ZG: 1.08694633185344e-72| (8) Cycling TH+: 4.19873770520905e-50| (9) Cortex X Zone: 4.45679368508111e-67| (10) E Neuroblast: 9.9064956512432…	(0) E ADR Chromaffin: 1.44626037895756e-27| (1) PN NOR Chromaffin: 1.05356941665785e-80| (3) Endothelial: 2.32111913264372e-107| (4) Macrophage: 4.99713133237154e-98| (5) E NOR Chromaffin: 2.33748320469815e-59| (6) E Glia|SCP: 1.09442885337729e-76| (7) Cortex ZG: 4.15952622273676e-68| (8) Cycling TH+: 1.6067729450294e-45| (9) Cortex X Zone: 1.70552580740684e-62| (10) E Neuroblast: 3.7910177558177…	(0) E ADR Chromaffin: 1.70321597463413| (1) PN NOR Chromaffin: 3.08088203985984| (3) Endothelial: 8.75775425645951| (4) Macrophage: 6.14223641214501| (5) E NOR Chromaffin: 3.68951622131675| (6) E Glia|SCP: 7.13214771978697| (7) Cortex ZG: 5.23588963400901| (8) Cycling TH+: 3.72974408038406| (9) Cortex X Zone: 6.44970789440589| (10) E Neuroblast: 4.40425314611081| (11) PN Sustentacular: 6.84431947…	(0) E ADR Chromaffin: 0.376| (1) PN NOR Chromaffin: 0.16| (3) Endothelial: 0.003| (4) Macrophage: 0.013| (5) E NOR Chromaffin: 0.134| (6) E Glia|SCP: 0.01| (7) Cortex ZG: 0.038| (8) Cycling TH+: 0.152| (9) Cortex X Zone: 0.024| (10) E Neuroblast: 0.036| (11) PN Sustentacular: 0.018| (12) Cortex ZF: 0| (13) Macrophage: 0.057| (14) Cortex ZG: 0.01| (15) Dendritic cell: 0| (16) T cell: 0| (17) NK ce…
Tmem59l	(2) PN ADR Chromaffin	5.79746	6.95626e-14	2.66202e-09	0.767	0.140526	(0) E ADR Chromaffin: 4.17059761025264e-31| (1) PN NOR Chromaffin: 1.36752013293741e-95| (3) Endothelial: 2.00271096980143e-151| (4) Macrophage: 1.29433413864345e-143| (5) E NOR Chromaffin: 2.40493769306171e-94| (6) E Glia|SCP: 1.41535988619866e-118| (7) Cortex ZG: 3.02649880144441e-117| (8) Cycling TH+: 2.86689754643612e-41| (9) Cortex X Zone: 1.29508136810602e-102| (10) E Neuroblast: 5.79486952…	(0) E ADR Chromaffin: 1.59600429349148e-26| (1) PN NOR Chromaffin: 5.23322604472489e-91| (3) Endothelial: 7.66397433923611e-147| (4) Macrophage: 4.95315788176076e-139| (5) E NOR Chromaffin: 9.20321556380855e-90| (6) E Glia|SCP: 5.41629921250502e-114| (7) Cortex ZG: 1.15818056133675e-112| (8) Cycling TH+: 1.09710435307018e-36| (9) Cortex X Zone: 4.95601737946811e-98| (10) E Neuroblast: 2.217580668…	(0) E ADR Chromaffin: 1.1568649810218| (1) PN NOR Chromaffin: 2.25264085319204| (3) Endothelial: 7.60800424483656| (4) Macrophage: 7.08193088740537| (5) E NOR Chromaffin: 3.38100249568624| (6) E Glia|SCP: 6.89066934884393| (7) Cortex ZG: 8.76684764291421| (8) Cycling TH+: 1.92281213550015| (9) Cortex X Zone: 8.47288525763729| (10) E Neuroblast: 1.74557742740187| (11) PN Sustentacular: 7.511702617…	(0) E ADR Chromaffin: 0.628| (1) PN NOR Chromaffin: 0.332| (3) Endothelial: 0.064| (4) Macrophage: 0.066| (5) E NOR Chromaffin: 0.232| (6) E Glia|SCP: 0.019| (7) Cortex ZG: 0.018| (8) Cycling TH+: 0.449| (9) Cortex X Zone: 0.024| (10) E Neuroblast: 0.546| (11) PN Sustentacular: 0.071| (12) Cortex ZF: 0.045| (13) Macrophage: 0.029| (14) Cortex ZG: 0.019| (15) Dendritic cell: 0.051| (16) T cell: 0.…
Mdga2	(2) PN ADR Chromaffin	4.36284	8.04128e-14	3.07724e-09	0.791	0.159211	(0) E ADR Chromaffin: 2.52103660210988e-28| (1) PN NOR Chromaffin: 3.09523810480715e-58| (3) Endothelial: 4.06530395020754e-158| (4) Macrophage: 1.0814589758157e-153| (5) E NOR Chromaffin: 7.96814936655109e-80| (6) E Glia|SCP: 1.10499551917609e-76| (7) Cortex ZG: 2.83680395911579e-124| (8) Cycling TH+: 6.88945021389118e-39| (9) Cortex X Zone: 1.33808140866559e-104| (10) E Neuroblast: 5.0700702772…	(0) E ADR Chromaffin: 9.64750286895409e-24| (1) PN NOR Chromaffin: 1.1844857179476e-53| (3) Endothelial: 1.55571051566542e-153| (4) Macrophage: 4.13852720865153e-149| (5) E NOR Chromaffin: 3.04925139959177e-75| (6) E Glia|SCP: 4.22859685278308e-72| (7) Cortex ZG: 1.08558813907443e-119| (8) Cycling TH+: 2.63645480785188e-34| (9) Cortex X Zone: 5.12056993468147e-100| (10) E Neuroblast: 1.9402144936…	(0) E ADR Chromaffin: 0.996079483650351| (1) PN NOR Chromaffin: 1.38229669848816| (3) Endothelial: 4.75999965467088| (4) Macrophage: 5.94079755992755| (5) E NOR Chromaffin: 2.5265940505022| (6) E Glia|SCP: 2.70391295773662| (7) Cortex ZG: 8.79786641063175| (8) Cycling TH+: 1.67824608465522| (9) Cortex X Zone: 6.86805561100121| (10) E Neuroblast: 2.70487075574456| (11) PN Sustentacular: 3.73450449…	(0) E ADR Chromaffin: 0.635| (1) PN NOR Chromaffin: 0.472| (3) Endothelial: 0.044| (4) Macrophage: 0.043| (5) E NOR Chromaffin: 0.28| (6) E Glia|SCP: 0.243| (7) Cortex ZG: 0.01| (8) Cycling TH+: 0.439| (9) Cortex X Zone: 0.05| (10) E Neuroblast: 0.247| (11) PN Sustentacular: 0.147| (12) Cortex ZF: 0.045| (13) Macrophage: 0.095| (14) Cortex ZG: 0.078| (15) Dendritic cell: 0.061| (16) T cell: 0.011…
RP23-182N12.4	(2) PN ADR Chromaffin	6.3419	3.81741e-19	1.46085e-14	0.959	0.295474	(0) E ADR Chromaffin: 2.78253629824478e-28| (1) PN NOR Chromaffin: 5.5667025237436e-159| (3) Endothelial: 7.75893007037077e-223| (4) Macrophage: 1.5755994424521e-209| (5) E NOR Chromaffin: 5.1336818493439e-97| (6) E Glia|SCP: 3.70369143376551e-170| (7) Cortex ZG: 2.1241592737809e-171| (8) Cycling TH+: 1.19616086798347e-67| (9) Cortex X Zone: 9.73860133791779e-150| (10) E Neuroblast: 1.32417630476…	(0) E ADR Chromaffin: 1.06482099061231e-23| (1) PN NOR Chromaffin: 2.1302657217862e-154| (3) Endothelial: 2.96918735932949e-218| (4) Macrophage: 6.02950394637571e-205| (5) E NOR Chromaffin: 1.96455737010692e-92| (6) E Glia|SCP: 1.41732863787339e-165| (7) Cortex ZG: 8.12873270890475e-167| (8) Cycling TH+: 4.57746840959913e-63| (9) Cortex X Zone: 3.72676795999438e-145| (10) E Neuroblast: 5.06735788…	(0) E ADR Chromaffin: 0.546793103888994| (1) PN NOR Chromaffin: 2.21772614209404| (3) Endothelial: 9.45793555311605| (4) Macrophage: 7.69628354552639| (5) E NOR Chromaffin: 1.79086244814058| (6) E Glia|SCP: 7.09769285319782| (7) Cortex ZG: 9.09970042495557| (8) Cycling TH+: 1.58820792324163| (9) Cortex X Zone: 8.42840808120417| (10) E Neuroblast: 2.60860259529508| (11) PN Sustentacular: 9.0577398…	(0) E ADR Chromaffin: 0.949| (1) PN NOR Chromaffin: 0.692| (3) Endothelial: 0.12| (4) Macrophage: 0.165| (5) E NOR Chromaffin: 0.642| (6) E Glia|SCP: 0.155| (7) Cortex ZG: 0.028| (8) Cycling TH+: 0.751| (9) Cortex X Zone: 0.112| (10) E Neuroblast: 0.482| (11) PN Sustentacular: 0.17| (12) Cortex ZF: 0.118| (13) Macrophage: 0.133| (14) Cortex ZG: 0.058| (15) Dendritic cell: 0.212| (16) T cell: 0.22…
Tmem158	(2) PN ADR Chromaffin	3.98127	4.93387e-10	1.88809e-05	0.824	0.173632	(0) E ADR Chromaffin: 1.4000246217843e-27| (1) PN NOR Chromaffin: 8.51261637930151e-130| (3) Endothelial: 2.37595686398333e-156| (4) Macrophage: 4.7732147793184e-169| (5) E NOR Chromaffin: 3.36670731958496e-111| (6) E Glia|SCP: 5.53542116619457e-107| (7) Cortex ZG: 5.45720459264657e-107| (8) Cycling TH+: 8.61035365472379e-62| (9) Cortex X Zone: 2.7526100522926e-111| (10) E Neuroblast: 6.981934267…	(0) E ADR Chromaffin: 5.35761422264415e-23| (1) PN NOR Chromaffin: 3.2576080360311e-125| (3) Endothelial: 9.09231172709142e-152| (4) Macrophage: 1.82661383174957e-164| (5) E NOR Chromaffin: 1.28837155705877e-106| (6) E Glia|SCP: 2.11829497187934e-102| (7) Cortex ZG: 2.08836305351399e-102| (8) Cycling TH+: 3.2950101365897e-57| (9) Cortex X Zone: 1.05336881481133e-106| (10) E Neuroblast: 2.67184660…	(0) E ADR Chromaffin: 0.86833493268089| (1) PN NOR Chromaffin: 2.55264944163925| (3) Endothelial: 4.26404393888147| (4) Macrophage: 6.75922845066364| (5) E NOR Chromaffin: 3.29310828843376| (6) E Glia|SCP: 3.64337457898929| (7) Cortex ZG: 3.83163932491764| (8) Cycling TH+: 2.10134208216816| (9) Cortex X Zone: 5.98055240140879| (10) E Neuroblast: 2.62225850530341| (11) PN Sustentacular: 3.28629168…	(0) E ADR Chromaffin: 0.695| (1) PN NOR Chromaffin: 0.307| (3) Endothelial: 0.069| (4) Macrophage: 0.013| (5) E NOR Chromaffin: 0.209| (6) E Glia|SCP: 0.148| (7) Cortex ZG: 0.143| (8) Cycling TH+: 0.414| (9) Cortex X Zone: 0.062| (10) E Neuroblast: 0.243| (11) PN Sustentacular: 0.112| (12) Cortex ZF: 0.036| (13) Macrophage: 0.01| (14) Cortex ZG: 0.602| (15) Dendritic cell: 0.02| (16) T cell: 0.01…
Fam159a	(2) PN ADR Chromaffin	4.98378	1.24288e-16	4.75624e-12	0.885	0.187526	(0) E ADR Chromaffin: 3.76257573701515e-27| (1) PN NOR Chromaffin: 7.27627189518603e-30| (3) Endothelial: 2.86878315446201e-199| (4) Macrophage: 2.72244759061908e-192| (5) E NOR Chromaffin: 8.41328189618023e-31| (6) E Glia|SCP: 2.39946021803272e-150| (7) Cortex ZG: 1.57397765785924e-148| (8) Cycling TH+: 1.70363260534221e-66| (9) Cortex X Zone: 1.25411765247799e-130| (10) E Neuroblast: 1.53766579…	(0) E ADR Chromaffin: 1.43986248304096e-22| (1) PN NOR Chromaffin: 2.78448372884979e-25| (3) Endothelial: 1.09782593754952e-194| (4) Macrophage: 1.04182624397811e-187| (5) E NOR Chromaffin: 3.21959471603025e-26| (6) E Glia|SCP: 9.18225436236763e-146| (7) Cortex ZG: 6.02329770109573e-144| (8) Cycling TH+: 6.51946125412355e-62| (9) Cortex X Zone: 4.79925743250277e-126| (10) E Neuroblast: 5.88433946…	(0) E ADR Chromaffin: 0.688760147400032| (1) PN NOR Chromaffin: 0.699068000095388| (3) Endothelial: 7.19045133954279| (4) Macrophage: 8.51835465705361| (5) E NOR Chromaffin: 0.863746893030329| (6) E Glia|SCP: 6.61785041511301| (7) Cortex ZG: 7.14604704957318| (8) Cycling TH+: 1.93075109628474| (9) Cortex X Zone: 7.41420492787754| (10) E Neuroblast: 1.78839781337345| (11) PN Sustentacular: 5.35575…	(0) E ADR Chromaffin: 0.793| (1) PN NOR Chromaffin: 0.719| (3) Endothelial: 0.019| (4) Macrophage: 0.013| (5) E NOR Chromaffin: 0.64| (6) E Glia|SCP: 0.027| (7) Cortex ZG: 0.01| (8) Cycling TH+: 0.537| (9) Cortex X Zone: 0.038| (10) E Neuroblast: 0.506| (11) PN Sustentacular: 0.054| (12) Cortex ZF: 0.018| (13) Macrophage: 0.029| (14) Cortex ZG: 0.039| (15) Dendritic cell: 0.02| (16) T cell: 0.011…
Cpa4	(2) PN ADR Chromaffin	5.37444	2.32133e-13	8.88326e-09	0.759	0.105	(0) E ADR Chromaffin: 2.94710807992485e-24| (1) PN NOR Chromaffin: 6.88012397885249e-124| (3) Endothelial: 3.50601941939608e-154| (4) Macrophage: 1.96149113943934e-150| (5) E NOR Chromaffin: 5.92931569678556e-88| (6) E Glia|SCP: 1.99417001800317e-107| (7) Cortex ZG: 1.62581889802844e-115| (8) Cycling TH+: 3.85177586520537e-47| (9) Cortex X Zone: 5.62231612191086e-100| (10) E Neuroblast: 2.6267516…	(0) E ADR Chromaffin: 1.12779932002564e-19| (1) PN NOR Chromaffin: 2.63288584422727e-119| (3) Endothelial: 1.34168351141449e-149| (4) Macrophage: 7.50623429240647e-146| (5) E NOR Chromaffin: 2.2690305308459e-83| (6) E Glia|SCP: 7.63128982489455e-103| (7) Cortex ZG: 6.22168375897524e-111| (8) Cycling TH+: 1.47399758809679e-42| (9) Cortex X Zone: 2.15154793353285e-95| (10) E Neuroblast: 1.005205336…	(0) E ADR Chromaffin: 0.864366416304093| (1) PN NOR Chromaffin: 2.88992695491235| (3) Endothelial: 7.02497977633158| (4) Macrophage: 9.04810307027943| (5) E NOR Chromaffin: 2.82917304705323| (6) E Glia|SCP: 4.90588599408597| (7) Cortex ZG: 7.7429668932882| (8) Cycling TH+: 1.87209537918459| (9) Cortex X Zone: 8.55949151668143| (10) E Neuroblast: 3.52209079047156| (11) PN Sustentacular: 4.08939140…	(0) E ADR Chromaffin: 0.592| (1) PN NOR Chromaffin: 0.253| (3) Endothelial: 0.027| (4) Macrophage: 0.013| (5) E NOR Chromaffin: 0.205| (6) E Glia|SCP: 0.061| (7) Cortex ZG: 0.01| (8) Cycling TH+: 0.356| (9) Cortex X Zone: 0.035| (10) E Neuroblast: 0.163| (11) PN Sustentacular: 0.098| (12) Cortex ZF: 0| (13) Macrophage: 0.038| (14) Cortex ZG: 0.049| (15) Dendritic cell: 0.01| (16) T cell: 0.023| (…
Nrxn1	(2) PN ADR Chromaffin	4.42853	2.03128e-17	7.77331e-13	0.952	0.299105	(0) E ADR Chromaffin: 7.24635105849381e-24| (1) PN NOR Chromaffin: 6.80040412997321e-46| (3) Endothelial: 3.36775969339881e-214| (4) Macrophage: 5.88543680144385e-211| (5) E NOR Chromaffin: 3.81904912318017e-16| (6) E Glia|SCP: 4.97308390201573e-166| (7) Cortex ZG: 7.14408234780278e-168| (8) Cycling TH+: 2.78279821877733e-30| (9) Cortex X Zone: 4.15136238021866e-147| (10) E Neuroblast: 1.59829891…	(0) E ADR Chromaffin: 2.77303362306441e-19| (1) PN NOR Chromaffin: 2.60237865245815e-41| (3) Endothelial: 1.28877427946986e-209| (4) Macrophage: 2.25223895517653e-206| (5) E NOR Chromaffin: 1.46147371845859e-11| (6) E Glia|SCP: 1.90309974762338e-161| (7) Cortex ZG: 2.73389743285717e-163| (8) Cycling TH+: 1.06492122236171e-25| (9) Cortex X Zone: 1.58864335566208e-142| (10) E Neuroblast: 6.11637028…	(0) E ADR Chromaffin: 0.620988763073181| (1) PN NOR Chromaffin: 0.937081188583595| (3) Endothelial: 5.47427367274855| (4) Macrophage: 6.9583911925563| (5) E NOR Chromaffin: 0.57343591486126| (6) E Glia|SCP: 6.00280014731334| (7) Cortex ZG: 7.6570073449304| (8) Cycling TH+: 1.00480166734679| (9) Cortex X Zone: 7.03803422593756| (10) E Neuroblast: 0.831111746189792| (11) PN Sustentacular: 2.2679882…	(0) E ADR Chromaffin: 0.954| (1) PN NOR Chromaffin: 0.903| (3) Endothelial: 0.074| (4) Macrophage: 0.061| (5) E NOR Chromaffin: 0.921| (6) E Glia|SCP: 0.087| (7) Cortex ZG: 0.033| (8) Cycling TH+: 0.866| (9) Cortex X Zone: 0.071| (10) E Neuroblast: 0.833| (11) PN Sustentacular: 0.304| (12) Cortex ZF: 0.055| (13) Macrophage: 0.133| (14) Cortex ZG: 0.078| (15) Dendritic cell: 0.04| (16) T cell: 0.0…
Fxyd2	(2) PN ADR Chromaffin	3.7901	1.81754e-08	0.000695534	0.521	0.0672105	(0) E ADR Chromaffin: 1.18415348211128e-23| (1) PN NOR Chromaffin: 1.08409268940251e-41| (3) Endothelial: 2.19746920996727e-91| (4) Macrophage: 6.36211436617297e-72| (5) E NOR Chromaffin: 2.83974634825766e-55| (6) E Glia|SCP: 1.71131220376618e-64| (7) Cortex ZG: 3.86390749179737e-65| (8) Cycling TH+: 1.81987470305483e-42| (9) Cortex X Zone: 4.21192745070346e-57| (10) E Neuroblast: 1.1049115026365…	(0) E ADR Chromaffin: 4.53151854534344e-19| (1) PN NOR Chromaffin: 4.14860590380554e-37| (3) Endothelial: 8.40927517270275e-87| (4) Macrophage: 2.43465392564707e-67| (5) E NOR Chromaffin: 1.08671413255124e-50| (6) E Glia|SCP: 6.54884954137243e-60| (7) Cortex ZG: 1.47864011896102e-60| (8) Cycling TH+: 6.96429651365023e-38| (9) Cortex X Zone: 1.6118203968352e-52| (10) E Neuroblast: 4.22827533828949…	(0) E ADR Chromaffin: 1.09765018437139| (1) PN NOR Chromaffin: 1.80647182712734| (3) Endothelial: 6.81572195222871| (4) Macrophage: 3.44927745043801| (5) E NOR Chromaffin: 3.30056255163213| (6) E Glia|SCP: 5.0437918723856| (7) Cortex ZG: 5.82158682516739| (8) Cycling TH+: 2.78952816706349| (9) Cortex X Zone: 5.81002290723825| (10) E Neuroblast: 1.69020171461448| (11) PN Sustentacular: 4.545566520…	(0) E ADR Chromaffin: 0.31| (1) PN NOR Chromaffin: 0.229| (3) Endothelial: 0.013| (4) Macrophage: 0.054| (5) E NOR Chromaffin: 0.1| (6) E Glia|SCP: 0.022| (7) Cortex ZG: 0.013| (8) Cycling TH+: 0.11| (9) Cortex X Zone: 0.012| (10) E Neuroblast: 0.151| (11) PN Sustentacular: 0.022| (12) Cortex ZF: 0| (13) Macrophage: 0.057| (14) Cortex ZG: 0.039| (15) Dendritic cell: 0.03| (16) T cell: 0.011| (17)…
Shroom1	(2) PN ADR Chromaffin	4.05354	1.08003e-08	0.000413305	0.595	0.0839474	(0) E ADR Chromaffin: 2.94599497243862e-23| (1) PN NOR Chromaffin: 1.14529488286046e-34| (3) Endothelial: 7.12380773404272e-107| (4) Macrophage: 2.16759580052572e-104| (5) E NOR Chromaffin: 7.65507922037695e-73| (6) E Glia|SCP: 1.67680270901345e-65| (7) Cortex ZG: 1.27113155200161e-75| (8) Cycling TH+: 4.06745129244431e-49| (9) Cortex X Zone: 7.55210285385134e-62| (10) E Neuroblast: 6.09778447977…	(0) E ADR Chromaffin: 1.12737335605281e-18| (1) PN NOR Chromaffin: 4.3828144577304e-30| (3) Endothelial: 2.72613874366347e-102| (4) Macrophage: 8.29495560945181e-100| (5) E NOR Chromaffin: 2.92944571605385e-68| (6) E Glia|SCP: 6.41678860685265e-61| (7) Cortex ZG: 4.86436622319978e-71| (8) Cycling TH+: 1.55653226059259e-44| (9) Cortex X Zone: 2.89003872011183e-57| (10) E Neuroblast: 2.333500164719…	(0) E ADR Chromaffin: 0.87581686904468| (1) PN NOR Chromaffin: 1.28383850413257| (3) Endothelial: 5.32345564455619| (4) Macrophage: 7.29566530752769| (5) E NOR Chromaffin: 3.40894003143815| (6) E Glia|SCP: 3.35503553250281| (7) Cortex ZG: 5.1975949713848| (8) Cycling TH+: 2.89708844152808| (9) Cortex X Zone: 4.4587045427026| (10) E Neuroblast: 1.93960370515438| (11) PN Sustentacular: 4.8585015479…	(0) E ADR Chromaffin: 0.376| (1) PN NOR Chromaffin: 0.318| (3) Endothelial: 0.017| (4) Macrophage: 0.013| (5) E NOR Chromaffin: 0.083| (6) E Glia|SCP: 0.07| (7) Cortex ZG: 0.025| (8) Cycling TH+: 0.144| (9) Cortex X Zone: 0.05| (10) E Neuroblast: 0.159| (11) PN Sustentacular: 0.027| (12) Cortex ZF: 0.118| (13) Macrophage: 0.029| (14) Cortex ZG: 0.087| (15) Dendritic cell: 0.03| (16) T cell: 0| (1…
Sema5a	(2) PN ADR Chromaffin	3.77469	2.06921e-11	7.91845e-07	0.733	0.184	(0) E ADR Chromaffin: 4.89093303185587e-23| (1) PN NOR Chromaffin: 2.16851961869316e-171| (3) Endothelial: 7.99821295439716e-133| (4) Macrophage: 4.57601930973394e-137| (5) E NOR Chromaffin: 8.15174635180172e-117| (6) E Glia|SCP: 2.34199113954487e-88| (7) Cortex ZG: 8.76020371175607e-44| (8) Cycling TH+: 3.67716733362395e-35| (9) Cortex X Zone: 6.52072110344828e-66| (10) E Neuroblast: 2.599819977…	(0) E ADR Chromaffin: 1.87166225263061e-18| (1) PN NOR Chromaffin: 8.29849087681499e-167| (3) Endothelial: 3.06075613338871e-128| (4) Macrophage: 1.75115106944898e-132| (5) E NOR Chromaffin: 3.11951029390748e-112| (6) E Glia|SCP: 8.96233169281031e-84| (7) Cortex ZG: 3.35235475641481e-39| (8) Cycling TH+: 1.40717839523121e-30| (9) Cortex X Zone: 2.49534955186759e-61| (10) E Neuroblast: 9.948991091…	(0) E ADR Chromaffin: 0.986226980169494| (1) PN NOR Chromaffin: 5.45024723604596| (3) Endothelial: 4.28043871163626| (4) Macrophage: 6.64395983183194| (5) E NOR Chromaffin: 5.51810558469549| (6) E Glia|SCP: 3.71661000119685| (7) Cortex ZG: 1.82649040984699| (8) Cycling TH+: 1.88937206732768| (9) Cortex X Zone: 3.31505650083966| (10) E Neuroblast: 1.40353260755178| (11) PN Sustentacular: 3.0140429…	(0) E ADR Chromaffin: 0.585| (1) PN NOR Chromaffin: 0.097| (3) Endothelial: 0.067| (4) Macrophage: 0.036| (5) E NOR Chromaffin: 0.067| (6) E Glia|SCP: 0.119| (7) Cortex ZG: 0.343| (8) Cycling TH+: 0.447| (9) Cortex X Zone: 0.194| (10) E Neuroblast: 0.426| (11) PN Sustentacular: 0.152| (12) Cortex ZF: 0.155| (13) Macrophage: 0.048| (14) Cortex ZG: 0.35| (15) Dendritic cell: 0.04| (16) T cell: 0.04…
RP24-106M14.2	(2) PN ADR Chromaffin	3.50872	8.99652e-10	3.44279e-05	0.59	0.144895	(0) E ADR Chromaffin: 1.10766212837985e-21| (1) PN NOR Chromaffin: 1.49889960375825e-10| (3) Endothelial: 7.26144023733022e-108| (4) Macrophage: 1.04562325974748e-103| (5) E NOR Chromaffin: 8.56971850889172e-38| (6) E Glia|SCP: 7.0820771295163e-45| (7) Cortex ZG: 8.61116937026626e-49| (8) Cycling TH+: 9.87230318592645e-29| (9) Cortex X Zone: 4.61490988848507e-52| (10) E Neuroblast: 1.654072948088…	(0) E ADR Chromaffin: 4.23880143288402e-17| (1) PN NOR Chromaffin: 5.73598900366208e-06| (3) Endothelial: 2.77880795002153e-103| (4) Macrophage: 4.00139109040165e-99| (5) E NOR Chromaffin: 3.27945987898268e-33| (6) E Glia|SCP: 2.7101692759233e-40| (7) Cortex ZG: 3.29532229461349e-44| (8) Cycling TH+: 3.77793298319033e-24| (9) Cortex X Zone: 1.76603371612547e-47| (10) E Neuroblast: 6.3298063577433…	(0) E ADR Chromaffin: 1.10169467550348| (1) PN NOR Chromaffin: 0.806672220207401| (3) Endothelial: 7.86414459804001| (4) Macrophage: 8.1568249236314| (5) E NOR Chromaffin: 1.91448718659312| (6) E Glia|SCP: 2.30855999918338| (7) Cortex ZG: 2.64205872529042| (8) Cycling TH+: 1.82141765270448| (9) Cortex X Zone: 3.52357478083198| (10) E Neuroblast: 2.62126567997618| (11) PN Sustentacular: 1.88060546…	(0) E ADR Chromaffin: 0.418| (1) PN NOR Chromaffin: 0.488| (3) Endothelial: 0.019| (4) Macrophage: 0.013| (5) E NOR Chromaffin: 0.242| (6) E Glia|SCP: 0.172| (7) Cortex ZG: 0.148| (8) Cycling TH+: 0.27| (9) Cortex X Zone: 0.109| (10) E Neuroblast: 0.151| (11) PN Sustentacular: 0.147| (12) Cortex ZF: 0.2| (13) Macrophage: 0.019| (14) Cortex ZG: 0.233| (15) Dendritic cell: 0.01| (16) T cell: 0.011|…
Iqsec2	(2) PN ADR Chromaffin	2.42676	1.6674e-13	6.38079e-09	0.774	0.259737	(0) E ADR Chromaffin: 1.51485634968421e-18| (1) PN NOR Chromaffin: 1.50570212189842e-42| (3) Endothelial: 1.11400937866629e-69| (4) Macrophage: 3.72140890828126e-70| (5) E NOR Chromaffin: 3.8728220758828e-71| (6) E Glia|SCP: 1.47651043095574e-72| (7) Cortex ZG: 6.24382591630186e-71| (8) Cycling TH+: 2.53049581838454e-58| (9) Cortex X Zone: 1.05475645632328e-34| (10) E Neuroblast: 4.2655131901805e…	(0) E ADR Chromaffin: 5.79705227897153e-14| (1) PN NOR Chromaffin: 5.76202088008086e-38| (3) Endothelial: 4.26309109028016e-65| (4) Macrophage: 1.42410876102107e-65| (5) E NOR Chromaffin: 1.48205155199883e-66| (6) E Glia|SCP: 5.65031011718144e-68| (7) Cortex ZG: 2.38938730165039e-66| (8) Cycling TH+: 9.68370139779398e-54| (9) Cortex X Zone: 4.03634200705793e-30| (10) E Neuroblast: 1.6323265876182…	(0) E ADR Chromaffin: 0.743720955177007| (1) PN NOR Chromaffin: 1.39494815233716| (3) Endothelial: 1.23402718440816| (4) Macrophage: 1.73588082649318| (5) E NOR Chromaffin: 2.28922316348492| (6) E Glia|SCP: 2.336989624391| (7) Cortex ZG: 2.49368804907575| (8) Cycling TH+: 2.35373075246942| (9) Cortex X Zone: 1.60669868841931| (10) E Neuroblast: 2.18154606751175| (11) PN Sustentacular: 2.256213795…	(0) E ADR Chromaffin: 0.634| (1) PN NOR Chromaffin: 0.546| (3) Endothelial: 0.258| (4) Macrophage: 0.298| (5) E NOR Chromaffin: 0.301| (6) E Glia|SCP: 0.211| (7) Cortex ZG: 0.228| (8) Cycling TH+: 0.31| (9) Cortex X Zone: 0.444| (10) E Neuroblast: 0.259| (11) PN Sustentacular: 0.219| (12) Cortex ZF: 0.218| (13) Macrophage: 0.381| (14) Cortex ZG: 0.175| (15) Dendritic cell: 0.121| (16) T cell: 0.0…
Bdkrb2	(2) PN ADR Chromaffin	6.09528	6.75629e-18	2.5855e-13	0.906	0.177368	(0) E ADR Chromaffin: 2.06736314614309e-18| (1) PN NOR Chromaffin: 1.30808830886261e-137| (3) Endothelial: 5.73771610693124e-206| (4) Macrophage: 7.44857858801154e-199| (5) E NOR Chromaffin: 1.86073241897688e-114| (6) E Glia|SCP: 1.08709279247634e-156| (7) Cortex ZG: 2.31992045866023e-154| (8) Cycling TH+: 1.07651941103154e-55| (9) Cortex X Zone: 3.31928295301758e-136| (10) E Neuroblast: 4.431153…	(0) E ADR Chromaffin: 7.91138528766036e-14| (1) PN NOR Chromaffin: 5.00579234035543e-133| (3) Endothelial: 2.19570919980045e-201| (4) Macrophage: 2.85042205406026e-194| (5) E NOR Chromaffin: 7.12065082094073e-110| (6) E Glia|SCP: 4.16008669824847e-152| (7) Cortex ZG: 8.87787161120097e-150| (8) Cycling TH+: 4.11962448213549e-51| (9) Cortex X Zone: 1.27022320046077e-131| (10) E Neuroblast: 1.695713…	(0) E ADR Chromaffin: 0.510737485557838| (1) PN NOR Chromaffin: 2.12228944481258| (3) Endothelial: 7.46159450148684| (4) Macrophage: 8.41130846196081| (5) E NOR Chromaffin: 2.54797815904726| (6) E Glia|SCP: 8.13589197628774| (7) Cortex ZG: 7.85472297869076| (8) Cycling TH+: 1.55384430536149| (9) Cortex X Zone: 10.00458691858| (10) E Neuroblast: 2.05768367861597| (11) PN Sustentacular: 8.843813038…	(0) E ADR Chromaffin: 0.884| (1) PN NOR Chromaffin: 0.439| (3) Endothelial: 0.029| (4) Macrophage: 0.014| (5) E NOR Chromaffin: 0.327| (6) E Glia|SCP: 0.049| (7) Cortex ZG: 0.018| (8) Cycling TH+: 0.588| (9) Cortex X Zone: 0.047| (10) E Neuroblast: 0.538| (11) PN Sustentacular: 0.049| (12) Cortex ZF: 0.018| (13) Macrophage: 0.067| (14) Cortex ZG: 0.058| (15) Dendritic cell: 0.02| (16) T cell: 0.0…
Omg	(2) PN ADR Chromaffin	4.84654	2.61254e-13	9.99767e-09	0.766	0.165105	(0) E ADR Chromaffin: 4.77673756136314e-17| (1) PN NOR Chromaffin: 9.66032522521652e-23| (3) Endothelial: 1.7325723310636e-151| (4) Macrophage: 2.88505861916145e-149| (5) E NOR Chromaffin: 4.37586303855658e-39| (6) E Glia|SCP: 8.96442506598157e-107| (7) Cortex ZG: 5.89109216215087e-113| (8) Cycling TH+: 6.52924276800054e-39| (9) Cortex X Zone: 1.64256667575381e-100| (10) E Neuroblast: 3.336050195…	(0) E ADR Chromaffin: 1.82796192998245e-12| (1) PN NOR Chromaffin: 3.69681325718586e-18| (3) Endothelial: 6.6302077965142e-147| (4) Macrophage: 1.1040542323807e-144| (5) E NOR Chromaffin: 1.67455526759483e-34| (6) E Glia|SCP: 3.43050618424983e-102| (7) Cortex ZG: 2.25440314861189e-108| (8) Cycling TH+: 2.49861062245845e-34| (9) Cortex X Zone: 6.28577415477469e-96| (10) E Neuroblast: 1.27663968886…	(0) E ADR Chromaffin: 0.721470897364876| (1) PN NOR Chromaffin: 0.837330643959609| (3) Endothelial: 6.33940558371139| (4) Macrophage: 7.47744995420838| (5) E NOR Chromaffin: 1.4132114326045| (6) E Glia|SCP: 4.52176274710042| (7) Cortex ZG: 6.12536318029703| (8) Cycling TH+: 1.69698917799797| (9) Cortex X Zone: 7.28169444553556| (10) E Neuroblast: 3.39924591624962| (11) PN Sustentacular: 3.5567280…	(0) E ADR Chromaffin: 0.66| (1) PN NOR Chromaffin: 0.639| (3) Endothelial: 0.051| (4) Macrophage: 0.029| (5) E NOR Chromaffin: 0.455| (6) E Glia|SCP: 0.083| (7) Cortex ZG: 0.035| (8) Cycling TH+: 0.449| (9) Cortex X Zone: 0.041| (10) E Neuroblast: 0.207| (11) PN Sustentacular: 0.129| (12) Cortex ZF: 0.055| (13) Macrophage: 0.057| (14) Cortex ZG: 0.039| (15) Dendritic cell: 0.04| (16) T cell: 0.01…
Bend7	(2) PN ADR Chromaffin	3.24916	1.05601e-13	4.04116e-09	0.768	0.200263	(0) E ADR Chromaffin: 7.76261371940093e-13| (1) PN NOR Chromaffin: 1.5907475236363e-57| (3) Endothelial: 8.69301230969594e-114| (4) Macrophage: 6.31408560591285e-148| (5) E NOR Chromaffin: 1.94995744118105e-59| (6) E Glia|SCP: 1.1518683544573e-108| (7) Cortex ZG: 4.59805650961145e-81| (8) Cycling TH+: 9.91607835554192e-18| (9) Cortex X Zone: 8.9362905564688e-41| (10) E Neuroblast: 2.4930266362995…	(0) E ADR Chromaffin: 2.97059701814035e-08| (1) PN NOR Chromaffin: 6.0874726234514e-53| (3) Endothelial: 3.32664195067444e-109| (4) Macrophage: 2.41627427967073e-143| (5) E NOR Chromaffin: 7.46209713591164e-55| (6) E Glia|SCP: 4.40796981883719e-104| (7) Cortex ZG: 1.75958426509811e-76| (8) Cycling TH+: 3.79468486509878e-13| (9) Cortex X Zone: 3.41973967014948e-36| (10) E Neuroblast: 9.54031433179…	(0) E ADR Chromaffin: 0.521660327098128| (1) PN NOR Chromaffin: 1.55261409756341| (3) Endothelial: 2.39004439225441| (4) Macrophage: 6.0509311483849| (5) E NOR Chromaffin: 1.9655628109151| (6) E Glia|SCP: 4.76976763920676| (7) Cortex ZG: 2.97292575208465| (8) Cycling TH+: 0.983647746966735| (9) Cortex X Zone: 1.9998754822821| (10) E Neuroblast: 1.93960589348873| (11) PN Sustentacular: 2.761325716…	(0) E ADR Chromaffin: 0.634| (1) PN NOR Chromaffin: 0.434| (3) Endothelial: 0.133| (4) Macrophage: 0.029| (5) E NOR Chromaffin: 0.321| (6) E Glia|SCP: 0.056| (7) Cortex ZG: 0.17| (8) Cycling TH+: 0.548| (9) Cortex X Zone: 0.394| (10) E Neuroblast: 0.311| (11) PN Sustentacular: 0.134| (12) Cortex ZF: 0.227| (13) Macrophage: 0.067| (14) Cortex ZG: 0.233| (15) Dendritic cell: 0.03| (16) T cell: 0| (…
RP23-245M18.4	(2) PN ADR Chromaffin	3.50838	4.55474e-09	0.000174301	0.718	0.217053	(0) E ADR Chromaffin: 9.82841131444162e-11| (1) PN NOR Chromaffin: 2.27109749899549e-38| (3) Endothelial: 1.45377242759767e-130| (4) Macrophage: 5.97323420482265e-125| (5) E NOR Chromaffin: 1.10493547903161e-24| (6) E Glia|SCP: 8.75482565234049e-94| (7) Cortex ZG: 2.63188974355255e-75| (8) Cycling TH+: 5.82055316629416e-23| (9) Cortex X Zone: 2.7754177125374e-66| (10) E Neuroblast: 8.583008889431…	(0) E ADR Chromaffin: 3.76113644181052e-06| (1) PN NOR Chromaffin: 8.69103590915592e-34| (3) Endothelial: 5.56329632593078e-126| (4) Macrophage: 2.28583726550153e-120| (5) E NOR Chromaffin: 4.22836709115817e-20| (6) E Glia|SCP: 3.35029668063766e-89| (7) Cortex ZG: 1.00717156706269e-70| (8) Cycling TH+: 2.22740928567745e-18| (9) Cortex X Zone: 1.06209685023381e-61| (10) E Neuroblast: 0.00328454584…	(0) E ADR Chromaffin: 0.819979717062601| (1) PN NOR Chromaffin: 1.56901055245427| (3) Endothelial: 4.61436144597311| (4) Macrophage: 5.15910641066216| (5) E NOR Chromaffin: 1.4489200369086| (6) E Glia|SCP: 4.79139012192536| (7) Cortex ZG: 3.61109773202816| (8) Cycling TH+: 1.63609353862164| (9) Cortex X Zone: 4.00317204216263| (10) E Neuroblast: 0.943884079644733| (11) PN Sustentacular: 5.0166847…	(0) E ADR Chromaffin: 0.665| (1) PN NOR Chromaffin: 0.509| (3) Endothelial: 0.052| (4) Macrophage: 0.057| (5) E NOR Chromaffin: 0.502| (6) E Glia|SCP: 0.087| (7) Cortex ZG: 0.175| (8) Cycling TH+: 0.516| (9) Cortex X Zone: 0.215| (10) E Neuroblast: 0.586| (11) PN Sustentacular: 0.04| (12) Cortex ZF: 0.1| (13) Macrophage: 0.057| (14) Cortex ZG: 0.282| (15) Dendritic cell: 0.04| (16) T cell: 0.045|…
Acsl6	(2) PN ADR Chromaffin	3.61694	7.07674e-08	0.00270813	0.563	0.135474	(0) E ADR Chromaffin: 1.27471820832339e-10| (1) PN NOR Chromaffin: 6.14265027985294e-12| (3) Endothelial: 8.79618545732941e-94| (4) Macrophage: 2.00041428775563e-93| (5) E NOR Chromaffin: 1.20943094922176e-11| (6) E Glia|SCP: 3.10380461985795e-70| (7) Cortex ZG: 5.50405944310633e-73| (8) Cycling TH+: 1.08300245338621e-14| (9) Cortex X Zone: 2.00927590795776e-59| (10) E Neuroblast: 1.0155135831362…	(0) E ADR Chromaffin: 4.87809163961194e-06| (1) PN NOR Chromaffin: 2.35066940909412e-07| (3) Endothelial: 3.36612425081082e-89| (4) Macrophage: 7.65518539638323e-89| (5) E NOR Chromaffin: 4.62825035648185e-07| (6) E Glia|SCP: 1.18776395192724e-65| (7) Cortex ZG: 2.10629346768793e-68| (8) Cycling TH+: 4.14443378861836e-10| (9) Cortex X Zone: 7.68909704457276e-55| (10) E Neuroblast: 0.0388616737994…	(0) E ADR Chromaffin: 0.708073365220062| (1) PN NOR Chromaffin: 0.719367411115742| (3) Endothelial: 5.0520837492134| (4) Macrophage: 5.58636973052452| (5) E NOR Chromaffin: 0.880895522198088| (6) E Glia|SCP: 5.97025732328761| (7) Cortex ZG: 6.86125357421052| (8) Cycling TH+: 1.2768385300014| (9) Cortex X Zone: 5.06784719899848| (10) E Neuroblast: 0.772275426055676| (11) PN Sustentacular: 1.611812…	(0) E ADR Chromaffin: 0.44| (1) PN NOR Chromaffin: 0.426| (3) Endothelial: 0.035| (4) Macrophage: 0.02| (5) E NOR Chromaffin: 0.386| (6) E Glia|SCP: 0.039| (7) Cortex ZG: 0.013| (8) Cycling TH+: 0.356| (9) Cortex X Zone: 0.035| (10) E Neuroblast: 0.386| (11) PN Sustentacular: 0.116| (12) Cortex ZF: 0.036| (13) Macrophage: 0.048| (14) Cortex ZG: 0.039| (15) Dendritic cell: 0.01| (16) T cell: 0.034…
Sh3gl3	(2) PN ADR Chromaffin	4.4414	5.44209e-11	2.08258e-06	0.734	0.133526	(0) E ADR Chromaffin: 1.02464526220394e-09| (1) PN NOR Chromaffin: 7.54647818040767e-79| (3) Endothelial: 9.91436616148781e-143| (4) Macrophage: 3.32019221411281e-141| (5) E NOR Chromaffin: 1.80612421142432e-49| (6) E Glia|SCP: 3.46064926944229e-103| (7) Cortex ZG: 1.03446440108365e-109| (8) Cycling TH+: 7.02341478292196e-36| (9) Cortex X Zone: 2.32097036841747e-90| (10) E Neuroblast: 1.820470531…	(0) E ADR Chromaffin: 3.92111248940203e-05| (1) PN NOR Chromaffin: 2.88788627007841e-74| (3) Endothelial: 3.79402964267816e-138| (4) Macrophage: 1.27057115649669e-136| (5) E NOR Chromaffin: 6.91167613227861e-45| (6) E Glia|SCP: 1.32432126243017e-98| (7) Cortex ZG: 3.95868837006691e-105| (8) Cycling TH+: 2.68772036912857e-31| (9) Cortex X Zone: 8.88188940585996e-86| (10) E Neuroblast: 6.9665766282…	(0) E ADR Chromaffin: 0.560399412761615| (1) PN NOR Chromaffin: 2.00819185954587| (3) Endothelial: 3.95074722207266| (4) Macrophage: 7.84220315456868| (5) E NOR Chromaffin: 1.73434415264937| (6) E Glia|SCP: 4.57190042773973| (7) Cortex ZG: 7.48325336901907| (8) Cycling TH+: 1.73858674852566| (9) Cortex X Zone: 5.54391610555585| (10) E Neuroblast: 0.975924059614369| (11) PN Sustentacular: 6.908863…	(0) E ADR Chromaffin: 0.656| (1) PN NOR Chromaffin: 0.331| (3) Endothelial: 0.035| (4) Macrophage: 0.022| (5) E NOR Chromaffin: 0.35| (6) E Glia|SCP: 0.051| (7) Cortex ZG: 0.01| (8) Cycling TH+: 0.42| (9) Cortex X Zone: 0.05| (10) E Neuroblast: 0.462| (11) PN Sustentacular: 0.013| (12) Cortex ZF: 0.018| (13) Macrophage: 0.029| (14) Cortex ZG: 0.01| (15) Dendritic cell: 0| (16) T cell: 0.011| (17)…
Vgf	(2) PN ADR Chromaffin	5.39832	8.0647e-11	3.0862e-06	0.789	0.145842	(0) E ADR Chromaffin: 1.53196251235407e-09| (1) PN NOR Chromaffin: 2.77899096190945e-44| (3) Endothelial: 9.4001500580809e-167| (4) Macrophage: 1.96170520763839e-159| (5) E NOR Chromaffin: 1.42534463330279e-29| (6) E Glia|SCP: 9.65725945057576e-126| (7) Cortex ZG: 1.37933451968809e-122| (8) Cycling TH+: 1.53534717997352e-26| (9) Cortex X Zone: 7.40081985708726e-109| (10) E Neuroblast: 1.161794812…	(0) E ADR Chromaffin: 5.86251414227656e-05| (1) PN NOR Chromaffin: 1.06346426130351e-39| (3) Endothelial: 3.5972494242264e-162| (4) Macrophage: 7.50705348859061e-155| (5) E NOR Chromaffin: 5.45450884272311e-25| (6) E Glia|SCP: 3.69564004654633e-121| (7) Cortex ZG: 5.27843733994239e-118| (8) Cycling TH+: 5.87546658832266e-22| (9) Cortex X Zone: 2.83214574291015e-104| (10) E Neuroblast: 4.445956389…	(0) E ADR Chromaffin: 0.552457220707454| (1) PN NOR Chromaffin: 1.38362310525043| (3) Endothelial: 8.22569203632355| (4) Macrophage: 8.53313513035318| (5) E NOR Chromaffin: 0.969780309431971| (6) E Glia|SCP: 7.63483407080836| (7) Cortex ZG: 7.14660243541523| (8) Cycling TH+: 1.341541111618| (9) Cortex X Zone: 8.14194243663969| (10) E Neuroblast: 2.15175841625467| (11) PN Sustentacular: 6.82005005…	(0) E ADR Chromaffin: 0.695| (1) PN NOR Chromaffin: 0.519| (3) Endothelial: 0.017| (4) Macrophage: 0.014| (5) E NOR Chromaffin: 0.482| (6) E Glia|SCP: 0.012| (7) Cortex ZG: 0.008| (8) Cycling TH+: 0.553| (9) Cortex X Zone: 0.009| (10) E Neuroblast: 0.339| (11) PN Sustentacular: 0.036| (12) Cortex ZF: 0.018| (13) Macrophage: 0.019| (14) Cortex ZG: 0.029| (15) Dendritic cell: 0.01| (16) T cell: 0.0…
Slc24a2	(2) PN ADR Chromaffin	5.07133	5.30101e-10	2.02859e-05	0.839	0.194842	(0) E ADR Chromaffin: 1.00718921915429e-08| (1) PN NOR Chromaffin: 1.06112153652053e-14| (3) Endothelial: 1.34454096601736e-173| (4) Macrophage: 6.13480121217795e-170| (5) E NOR Chromaffin: 6.74100469618344e-21| (6) E Glia|SCP: 5.02572689705005e-136| (7) Cortex ZG: 3.49720054154188e-135| (8) Cycling TH+: 1.6204373623224e-45| (9) Cortex X Zone: 2.09103939299618e-117| (10) E Neuroblast: 3.786211837…	(0) E ADR Chromaffin: 0.000385431170385964| (1) PN NOR Chromaffin: 4.06069989595676e-10| (3) Endothelial: 5.14528936875522e-169| (4) Macrophage: 2.34766572787626e-165| (5) E NOR Chromaffin: 2.57964767713548e-16| (6) E Glia|SCP: 1.92324516896311e-131| (7) Cortex ZG: 1.33830870323725e-130| (8) Cycling TH+: 6.20108969813537e-41| (9) Cortex X Zone: 8.0019895491178e-113| (10) E Neuroblast: 1.448907546…	(0) E ADR Chromaffin: 0.507575037668301| (1) PN NOR Chromaffin: 0.630011853913405| (3) Endothelial: 5.8425936115682| (4) Macrophage: 5.78152019556035| (5) E NOR Chromaffin: 0.85192833788939| (6) E Glia|SCP: 7.90801390478811| (7) Cortex ZG: 7.47749497771901| (8) Cycling TH+: 1.74374376565728| (9) Cortex X Zone: 7.21008375679366| (10) E Neuroblast: 2.94653575124912| (11) PN Sustentacular: 6.0104587…	(0) E ADR Chromaffin: 0.822| (1) PN NOR Chromaffin: 0.778| (3) Endothelial: 0.056| (4) Macrophage: 0.034| (5) E NOR Chromaffin: 0.638| (6) E Glia|SCP: 0.049| (7) Cortex ZG: 0.015| (8) Cycling TH+: 0.551| (9) Cortex X Zone: 0.041| (10) E Neuroblast: 0.255| (11) PN Sustentacular: 0.103| (12) Cortex ZF: 0.027| (13) Macrophage: 0.057| (14) Cortex ZG: 0.107| (15) Dendritic cell: 0.051| (16) T cell: 0.…
Adgrl4	(3) Endothelial	10.1289	1.23403e-20	4.72238e-16	0.99	0.114263	(0) E ADR Chromaffin: 0| (1) PN NOR Chromaffin: 8.67426078147524e-280| (2) PN ADR Chromaffin: 2.44143939614606e-277| (4) Macrophage: 7.55080752885473e-190| (5) E NOR Chromaffin: 9.84738704079631e-190| (6) E Glia|SCP: 5.02683028130241e-168| (7) Cortex ZG: 3.79391865655063e-163| (8) Cycling TH+: 3.19152514837325e-157| (9) Cortex X Zone: 6.79415221743111e-147| (10) E Neuroblast: 9.66734827467391e-11…	(0) E ADR Chromaffin: 0| (1) PN NOR Chromaffin: 3.31946611585495e-275| (2) PN ADR Chromaffin: 9.34290028117175e-273| (4) Macrophage: 2.88954302514213e-185| (5) E NOR Chromaffin: 3.76839807277193e-185| (6) E Glia|SCP: 1.92366741204881e-163| (7) Cortex ZG: 1.4518567914888e-158| (8) Cycling TH+: 1.22133284377948e-152| (9) Cortex X Zone: 2.59998617056654e-142| (10) E Neuroblast: 3.69950083775221e-113…	(0) E ADR Chromaffin: 10.9472721976616| (1) PN NOR Chromaffin: 11.1606464252843| (2) PN ADR Chromaffin: 11.2523122068092| (4) Macrophage: 9.34349944561084| (5) E NOR Chromaffin: 10.1176877354604| (6) E Glia|SCP: 10.306153087338| (7) Cortex ZG: 11.4882740359743| (8) Cycling TH+: 10.6659627477929| (9) Cortex X Zone: 12.1236158785829| (10) E Neuroblast: 11.9994763186217| (11) PN Sustentacular: 10.54…	(0) E ADR Chromaffin: 0.02| (1) PN NOR Chromaffin: 0.048| (2) PN ADR Chromaffin: 0.044| (4) Macrophage: 0.355| (5) E NOR Chromaffin: 0.037| (6) E Glia|SCP: 0.029| (7) Cortex ZG: 0.065| (8) Cycling TH+: 0.021| (9) Cortex X Zone: 0.024| (10) E Neuroblast: 0.016| (11) PN Sustentacular: 0.107| (12) Cortex ZF: 0.109| (13) Macrophage: 0.076| (14) Cortex ZG: 0.039| (15) Dendritic cell: 0.202| (16) T cel…
Ly6a	(3) Endothelial	7.341	9.36451e-20	3.58361e-15	0.987	0.204632	(0) E ADR Chromaffin: 0| (1) PN NOR Chromaffin: 3.8563379459239e-276| (2) PN ADR Chromaffin: 3.8068720462018e-275| (4) Macrophage: 2.92378363455773e-153| (5) E NOR Chromaffin: 3.15605763650329e-189| (6) E Glia|SCP: 7.55683336500498e-147| (7) Cortex ZG: 3.8085492463104e-160| (8) Cycling TH+: 2.7426247125538e-152| (9) Cortex X Zone: 5.50051077786771e-146| (10) E Neuroblast: 7.28043158322727e-117| (…	(0) E ADR Chromaffin: 0| (1) PN NOR Chromaffin: 1.47574340514616e-271| (2) PN ADR Chromaffin: 1.4568137946405e-270| (4) Macrophage: 1.11887352127255e-148| (5) E NOR Chromaffin: 1.20776013633708e-184| (6) E Glia|SCP: 2.89184899212011e-142| (7) Cortex ZG: 1.45745562557806e-155| (8) Cycling TH+: 1.04954762500009e-147| (9) Cortex X Zone: 2.10493546447442e-141| (10) E Neuroblast: 2.78607555826941e-112…	(0) E ADR Chromaffin: 10.724989091982| (1) PN NOR Chromaffin: 10.7883212288919| (2) PN ADR Chromaffin: 9.36206576444719| (4) Macrophage: 3.66583635982938| (5) E NOR Chromaffin: 10.1989831754225| (6) E Glia|SCP: 4.52838842996583| (7) Cortex ZG: 9.9332116590877| (8) Cycling TH+: 6.70629901410674| (9) Cortex X Zone: 11.1205428448737| (10) E Neuroblast: 9.8755288596471| (11) PN Sustentacular: 9.56332…	(0) E ADR Chromaffin: 0.027| (1) PN NOR Chromaffin: 0.058| (2) PN ADR Chromaffin: 0.044| (4) Macrophage: 0.481| (5) E NOR Chromaffin: 0.028| (6) E Glia|SCP: 0.308| (7) Cortex ZG: 0.123| (8) Cycling TH+: 0.053| (9) Cortex X Zone: 0.024| (10) E Neuroblast: 0.02| (11) PN Sustentacular: 0.161| (12) Cortex ZF: 0.236| (13) Macrophage: 0.095| (14) Cortex ZG: 0.039| (15) Dendritic cell: 0.394| (16) T cel…
Ly6c1	(3) Endothelial	9.19279	9.6224e-21	3.6823e-16	0.993	0.131526	(0) E ADR Chromaffin: 0| (1) PN NOR Chromaffin: 1.03973346187835e-279| (2) PN ADR Chromaffin: 1.36396765668295e-276| (4) Macrophage: 5.04201121437485e-191| (5) E NOR Chromaffin: 1.31752651768801e-191| (6) E Glia|SCP: 1.76540728325025e-166| (7) Cortex ZG: 1.13509922780184e-162| (8) Cycling TH+: 4.75803358659375e-158| (9) Cortex X Zone: 4.59751615910816e-148| (10) E Neuroblast: 2.96887848509493e-11…	(0) E ADR Chromaffin: 0| (1) PN NOR Chromaffin: 3.97885201191607e-275| (2) PN ADR Chromaffin: 5.21963142859431e-272| (4) Macrophage: 1.92947685151697e-186| (5) E NOR Chromaffin: 5.04191047788847e-187| (6) E Glia|SCP: 6.75586059154207e-162| (7) Cortex ZG: 4.3437977249521e-158| (8) Cycling TH+: 1.8208042929177e-153| (9) Cortex X Zone: 1.75937748376751e-143| (10) E Neuroblast: 1.13613041867613e-113|…	(0) E ADR Chromaffin: 10.4694531642652| (1) PN NOR Chromaffin: 10.3351852680983| (2) PN ADR Chromaffin: 8.96431731797009| (4) Macrophage: 9.45744182768994| (5) E NOR Chromaffin: 10.2405798070323| (6) E Glia|SCP: 8.38232688372775| (7) Cortex ZG: 10.0969868311686| (8) Cycling TH+: 10.465836109471| (9) Cortex X Zone: 11.5031368013713| (10) E Neuroblast: 10.0486699584559| (11) PN Sustentacular: 10.58…	(0) E ADR Chromaffin: 0.033| (1) PN NOR Chromaffin: 0.056| (2) PN ADR Chromaffin: 0.051| (4) Macrophage: 0.373| (5) E NOR Chromaffin: 0.026| (6) E Glia|SCP: 0.095| (7) Cortex ZG: 0.113| (8) Cycling TH+: 0.027| (9) Cortex X Zone: 0.012| (10) E Neuroblast: 0.032| (11) PN Sustentacular: 0.107| (12) Cortex ZF: 0.109| (13) Macrophage: 0.105| (14) Cortex ZG: 0.039| (15) Dendritic cell: 0.192| (16) T ce…
Plvap	(3) Endothelial	9.27006	6.33031e-21	2.42248e-16	0.998	0.222789	(0) E ADR Chromaffin: 0| (1) PN NOR Chromaffin: 8.9340714313319e-275| (2) PN ADR Chromaffin: 6.59597306545293e-272| (4) Macrophage: 1.48910333705878e-190| (5) E NOR Chromaffin: 3.64094988202455e-190| (6) E Glia|SCP: 3.4848518838782e-166| (7) Cortex ZG: 3.79951319809142e-159| (8) Cycling TH+: 3.01167272377478e-157| (9) Cortex X Zone: 2.31708141161767e-146| (10) E Neuroblast: 6.89482257399679e-119|…	(0) E ADR Chromaffin: 0| (1) PN NOR Chromaffin: 3.41889045534209e-270| (2) PN ADR Chromaffin: 2.52414697268753e-267| (4) Macrophage: 5.69850065025654e-186| (5) E NOR Chromaffin: 1.39331870085315e-185| (6) E Glia|SCP: 1.33358311892251e-161| (7) Cortex ZG: 1.45399771064562e-154| (8) Cycling TH+: 1.15250691793413e-152| (9) Cortex X Zone: 8.86700714597852e-142| (10) E Neuroblast: 2.63851070261709e-11…	(0) E ADR Chromaffin: 9.78802450023078| (1) PN NOR Chromaffin: 10.9812437187849| (2) PN ADR Chromaffin: 10.2769281721241| (4) Macrophage: 9.92570256262823| (5) E NOR Chromaffin: 9.43143021858534| (6) E Glia|SCP: 8.2327039722908| (7) Cortex ZG: 9.32041706867283| (8) Cycling TH+: 9.30747380637658| (9) Cortex X Zone: 9.91657381406154| (10) E Neuroblast: 9.50030881511467| (11) PN Sustentacular: 9.245…	(0) E ADR Chromaffin: 0.08| (1) PN NOR Chromaffin: 0.095| (2) PN ADR Chromaffin: 0.094| (4) Macrophage: 0.474| (5) E NOR Chromaffin: 0.081| (6) E Glia|SCP: 0.158| (7) Cortex ZG: 0.358| (8) Cycling TH+: 0.104| (9) Cortex X Zone: 0.153| (10) E Neuroblast: 0.076| (11) PN Sustentacular: 0.223| (12) Cortex ZF: 0.236| (13) Macrophage: 0.2| (14) Cortex ZG: 0.126| (15) Dendritic cell: 0.232| (16) T cell:…
Tek	(3) Endothelial	9.03276	1.29902e-20	4.97108e-16	0.993	0.134421	(0) E ADR Chromaffin: 0| (1) PN NOR Chromaffin: 1.89081665300731e-276| (2) PN ADR Chromaffin: 2.86646841309007e-275| (4) Macrophage: 6.48592588355165e-192| (5) E NOR Chromaffin: 3.53853822800055e-191| (6) E Glia|SCP: 1.616457756961e-168| (7) Cortex ZG: 3.45216908206885e-162| (8) Cycling TH+: 4.99179283644145e-157| (9) Cortex X Zone: 2.30650002268314e-147| (10) E Neuroblast: 1.89711025844552e-117|…	(0) E ADR Chromaffin: 0| (1) PN NOR Chromaffin: 7.23577716772837e-272| (2) PN ADR Chromaffin: 1.09694013232131e-270| (4) Macrophage: 2.48203411711754e-187| (5) E NOR Chromaffin: 1.35412780909125e-186| (6) E Glia|SCP: 6.18586054433836e-164| (7) Cortex ZG: 1.32107606432611e-157| (8) Cycling TH+: 1.91025928264941e-152| (9) Cortex X Zone: 8.82651428680385e-143| (10) E Neuroblast: 7.2598615370193e-113…	(0) E ADR Chromaffin: 9.78066124034055| (1) PN NOR Chromaffin: 10.8097130043424| (2) PN ADR Chromaffin: 7.69736754602025| (4) Macrophage: 10.3676372414173| (5) E NOR Chromaffin: 9.85078543336432| (6) E Glia|SCP: 9.5921245167039| (7) Cortex ZG: 9.59280921960791| (8) Cycling TH+: 8.81393205619479| (9) Cortex X Zone: 9.86395719830981| (10) E Neuroblast: 8.67789753976933| (11) PN Sustentacular: 9.313…	(0) E ADR Chromaffin: 0.044| (1) PN NOR Chromaffin: 0.071| (2) PN ADR Chromaffin: 0.053| (4) Macrophage: 0.334| (5) E NOR Chromaffin: 0.028| (6) E Glia|SCP: 0.036| (7) Cortex ZG: 0.12| (8) Cycling TH+: 0.04| (9) Cortex X Zone: 0.029| (10) E Neuroblast: 0.064| (11) PN Sustentacular: 0.156| (12) Cortex ZF: 0.136| (13) Macrophage: 0.152| (14) Cortex ZG: 0.087| (15) Dendritic cell: 0.182| (16) T cell…
Flt1	(3) Endothelial	8.60218	5.19215e-21	1.98693e-16	1	0.247842	(0) E ADR Chromaffin: 0| (1) PN NOR Chromaffin: 2.73937834296834e-269| (2) PN ADR Chromaffin: 2.50238324837266e-266| (4) Macrophage: 5.73871860778774e-191| (5) E NOR Chromaffin: 6.03683997506486e-191| (6) E Glia|SCP: 3.38074189433436e-168| (7) Cortex ZG: 1.04405439285907e-160| (8) Cycling TH+: 2.86861596101504e-158| (9) Cortex X Zone: 8.85884732597643e-148| (10) E Neuroblast: 1.97858429844761e-11…	(0) E ADR Chromaffin: 0| (1) PN NOR Chromaffin: 1.04830530428712e-264| (2) PN ADR Chromaffin: 9.57612021487248e-262| (4) Macrophage: 2.19609283682821e-186| (5) E NOR Chromaffin: 2.31017792165782e-186| (6) E Glia|SCP: 1.29374230812387e-163| (7) Cortex ZG: 3.99538735059309e-156| (8) Cycling TH+: 1.09776195596123e-153| (9) Cortex X Zone: 3.39010369470466e-143| (10) E Neuroblast: 7.57164639329931e-11…	(0) E ADR Chromaffin: 9.56330845031968| (1) PN NOR Chromaffin: 9.718497905942| (2) PN ADR Chromaffin: 9.03973224555346| (4) Macrophage: 7.42197082931242| (5) E NOR Chromaffin: 8.88881089385503| (6) E Glia|SCP: 8.07773428297858| (7) Cortex ZG: 9.48486760427823| (8) Cycling TH+: 8.53454814514504| (9) Cortex X Zone: 10.5857396112761| (10) E Neuroblast: 9.80989394346242| (11) PN Sustentacular: 8.2787…	(0) E ADR Chromaffin: 0.073| (1) PN NOR Chromaffin: 0.135| (2) PN ADR Chromaffin: 0.135| (4) Macrophage: 0.499| (5) E NOR Chromaffin: 0.075| (6) E Glia|SCP: 0.102| (7) Cortex ZG: 0.316| (8) Cycling TH+: 0.075| (9) Cortex X Zone: 0.112| (10) E Neuroblast: 0.06| (11) PN Sustentacular: 0.214| (12) Cortex ZF: 0.382| (13) Macrophage: 0.171| (14) Cortex ZG: 0.068| (15) Dendritic cell: 0.444| (16) T cel…
Emcn	(3) Endothelial	9.16279	4.75507e-21	1.81967e-16	1	0.229421	(0) E ADR Chromaffin: 0| (1) PN NOR Chromaffin: 5.58603241684891e-275| (2) PN ADR Chromaffin: 1.63179067444291e-272| (4) Macrophage: 5.56374195649856e-192| (5) E NOR Chromaffin: 2.5253488824101e-193| (6) E Glia|SCP: 7.89054224192196e-169| (7) Cortex ZG: 1.64684424218815e-161| (8) Cycling TH+: 1.86911921216144e-158| (9) Cortex X Zone: 2.13394161604805e-148| (10) E Neuroblast: 1.76051608572228e-119…	(0) E ADR Chromaffin: 0| (1) PN NOR Chromaffin: 2.13766288527974e-270| (2) PN ADR Chromaffin: 6.24453655295811e-268| (4) Macrophage: 2.12913277191287e-187| (5) E NOR Chromaffin: 9.66400510320697e-189| (6) E Glia|SCP: 3.01955270513869e-164| (7) Cortex ZG: 6.30214354600559e-157| (8) Cycling TH+: 7.1527454010994e-154| (9) Cortex X Zone: 8.16616777629268e-144| (10) E Neuroblast: 6.73714295684203e-115…	(0) E ADR Chromaffin: 9.55757631828117| (1) PN NOR Chromaffin: 10.5081201847239| (2) PN ADR Chromaffin: 10.2389679506128| (4) Macrophage: 9.25954138135442| (5) E NOR Chromaffin: 10.6039788219805| (6) E Glia|SCP: 8.30353090030528| (7) Cortex ZG: 10.452722938521| (8) Cycling TH+: 9.25929203454557| (9) Cortex X Zone: 11.0201465578589| (10) E Neuroblast: 9.46162004915767| (11) PN Sustentacular: 10.35…	(0) E ADR Chromaffin: 0.082| (1) PN NOR Chromaffin: 0.1| (2) PN ADR Chromaffin: 0.097| (4) Macrophage: 0.504| (5) E NOR Chromaffin: 0.037| (6) E Glia|SCP: 0.102| (7) Cortex ZG: 0.276| (8) Cycling TH+: 0.086| (9) Cortex X Zone: 0.082| (10) E Neuroblast: 0.068| (11) PN Sustentacular: 0.214| (12) Cortex ZF: 0.236| (13) Macrophage: 0.133| (14) Cortex ZG: 0.097| (15) Dendritic cell: 0.424| (16) T cell…
Adgrf5	(3) Endothelial	8.42854	2.80657e-20	1.07402e-15	0.983	0.0982105	(0) E ADR Chromaffin: 0| (1) PN NOR Chromaffin: 2.83856086304837e-272| (2) PN ADR Chromaffin: 1.17770817779955e-267| (4) Macrophage: 2.77556367622108e-193| (5) E NOR Chromaffin: 6.1123713806166e-186| (6) E Glia|SCP: 2.12350459322299e-163| (7) Cortex ZG: 1.22308780035777e-160| (8) Cycling TH+: 3.16704655083377e-153| (9) Cortex X Zone: 2.09021987980606e-144| (10) E Neuroblast: 9.45028629752442e-116…	(0) E ADR Chromaffin: 0| (1) PN NOR Chromaffin: 1.08626047107135e-267| (2) PN ADR Chromaffin: 4.50685365480333e-263| (4) Macrophage: 1.06215270761628e-188| (5) E NOR Chromaffin: 2.33908227993436e-181| (6) E Glia|SCP: 8.12622737734573e-159| (7) Cortex ZG: 4.68051239440912e-156| (8) Cycling TH+: 1.21196537407307e-148| (9) Cortex X Zone: 7.99885343604184e-140| (10) E Neuroblast: 3.61643556033665e-11…	(0) E ADR Chromaffin: 9.31169404142473| (1) PN NOR Chromaffin: 9.20172328301771| (2) PN ADR Chromaffin: 9.26161522861271| (4) Macrophage: 9.77502256281667| (5) E NOR Chromaffin: 8.38416311618504| (6) E Glia|SCP: 7.53413247959583| (7) Cortex ZG: 10.7679254445736| (8) Cycling TH+: 8.21147316157338| (9) Cortex X Zone: 10.1657315480661| (10) E Neuroblast: 9.44495560957349| (11) PN Sustentacular: 8.24…	(0) E ADR Chromaffin: 0.035| (1) PN NOR Chromaffin: 0.063| (2) PN ADR Chromaffin: 0.071| (4) Macrophage: 0.197| (5) E NOR Chromaffin: 0.043| (6) E Glia|SCP: 0.046| (7) Cortex ZG: 0.075| (8) Cycling TH+: 0.048| (9) Cortex X Zone: 0.038| (10) E Neuroblast: 0.024| (11) PN Sustentacular: 0.103| (12) Cortex ZF: 0.118| (13) Macrophage: 0.038| (14) Cortex ZG: 0.068| (15) Dendritic cell: 0.121| (16) T ce…
Esam	(3) Endothelial	7.93677	9.52632e-21	3.64553e-16	0.993	0.134684	(0) E ADR Chromaffin: 0| (1) PN NOR Chromaffin: 3.66472262872966e-274| (2) PN ADR Chromaffin: 7.65278952896971e-270| (4) Macrophage: 2.22656287882638e-194| (5) E NOR Chromaffin: 2.8077740009751e-190| (6) E Glia|SCP: 6.13037139184135e-168| (7) Cortex ZG: 8.87416134697597e-155| (8) Cycling TH+: 5.51039356469445e-157| (9) Cortex X Zone: 3.07056655631192e-147| (10) E Neuroblast: 1.49951332261665e-117…	(0) E ADR Chromaffin: 0| (1) PN NOR Chromaffin: 1.40241605556227e-269| (2) PN ADR Chromaffin: 2.92856949694613e-265| (4) Macrophage: 8.52061082469278e-190| (5) E NOR Chromaffin: 1.07447895469315e-185| (6) E Glia|SCP: 2.34597052422985e-163| (7) Cortex ZG: 3.39596406426076e-150| (8) Cycling TH+: 2.10871740933727e-152| (9) Cortex X Zone: 1.17504440976945e-142| (10) E Neuroblast: 5.73833758298939e-11…	(0) E ADR Chromaffin: 9.2712876379295| (1) PN NOR Chromaffin: 8.90792639180308| (2) PN ADR Chromaffin: 8.05056110618457| (4) Macrophage: 9.61173859890922| (5) E NOR Chromaffin: 8.56720669283825| (6) E Glia|SCP: 8.26339929546416| (7) Cortex ZG: 5.72647053671435| (8) Cycling TH+: 8.33853933833467| (9) Cortex X Zone: 9.63840968391099| (10) E Neuroblast: 8.64757663580391| (11) PN Sustentacular: 7.467…	(0) E ADR Chromaffin: 0.038| (1) PN NOR Chromaffin: 0.08| (2) PN ADR Chromaffin: 0.084| (4) Macrophage: 0.266| (5) E NOR Chromaffin: 0.039| (6) E Glia|SCP: 0.044| (7) Cortex ZG: 0.286| (8) Cycling TH+: 0.043| (9) Cortex X Zone: 0.035| (10) E Neuroblast: 0.056| (11) PN Sustentacular: 0.138| (12) Cortex ZF: 0.218| (13) Macrophage: 0.076| (14) Cortex ZG: 0.136| (15) Dendritic cell: 0.172| (16) T cel…
Mmrn2	(3) Endothelial	8.77084	8.69817e-20	3.32862e-15	0.973	0.108684	(0) E ADR Chromaffin: 0| (1) PN NOR Chromaffin: 3.27897967147883e-268| (2) PN ADR Chromaffin: 1.82544784079316e-267| (4) Macrophage: 1.97330751730517e-181| (5) E NOR Chromaffin: 2.27251548734594e-184| (6) E Glia|SCP: 8.527307579102e-163| (7) Cortex ZG: 1.55394017310023e-155| (8) Cycling TH+: 1.75327017152237e-151| (9) Cortex X Zone: 1.61211819911315e-141| (10) E Neuroblast: 2.92523938333351e-113|…	(0) E ADR Chromaffin: 0| (1) PN NOR Chromaffin: 1.25479994068152e-263| (2) PN ADR Chromaffin: 6.98562379714728e-263| (4) Macrophage: 7.55145320722342e-177| (5) E NOR Chromaffin: 8.69646226697543e-180| (6) E Glia|SCP: 3.26323006437075e-158| (7) Cortex ZG: 5.94661825441996e-151| (8) Cycling TH+: 6.70941429238181e-147| (9) Cortex X Zone: 6.1692539243662e-137| (10) E Neuroblast: 1.11943060721407e-108…	(0) E ADR Chromaffin: 8.79174855113714| (1) PN NOR Chromaffin: 9.49073460595652| (2) PN ADR Chromaffin: 9.7569678221667| (4) Macrophage: 8.3307437661098| (5) E NOR Chromaffin: 9.05294233847129| (6) E Glia|SCP: 8.64188751829552| (7) Cortex ZG: 9.87724583627386| (8) Cycling TH+: 8.78821817081949| (9) Cortex X Zone: 9.50077431876884| (10) E Neuroblast: 8.27396121746423| (11) PN Sustentacular: 7.6811…	(0) E ADR Chromaffin: 0.03| (1) PN NOR Chromaffin: 0.062| (2) PN ADR Chromaffin: 0.051| (4) Macrophage: 0.312| (5) E NOR Chromaffin: 0.026| (6) E Glia|SCP: 0.022| (7) Cortex ZG: 0.118| (8) Cycling TH+: 0.035| (9) Cortex X Zone: 0.041| (10) E Neuroblast: 0.028| (11) PN Sustentacular: 0.103| (12) Cortex ZF: 0.173| (13) Macrophage: 0.019| (14) Cortex ZG: 0.078| (15) Dendritic cell: 0.182| (16) T cel…
Tie1	(3) Endothelial	8.56683	1.08986e-20	4.17066e-16	0.993	0.0874211	(0) E ADR Chromaffin: 0| (1) PN NOR Chromaffin: 5.59402422282636e-280| (2) PN ADR Chromaffin: 1.75182182252371e-271| (4) Macrophage: 3.87575921266745e-197| (5) E NOR Chromaffin: 4.99667940393075e-190| (6) E Glia|SCP: 8.22270752749254e-166| (7) Cortex ZG: 4.93521584992957e-163| (8) Cycling TH+: 1.94058128630864e-157| (9) Cortex X Zone: 2.67285281632887e-147| (10) E Neuroblast: 1.13025114668565e-11…	(0) E ADR Chromaffin: 0| (1) PN NOR Chromaffin: 2.14072118959119e-275| (2) PN ADR Chromaffin: 6.70387175043372e-267| (4) Macrophage: 1.48317553550358e-192| (5) E NOR Chromaffin: 1.91212927429622e-185| (6) E Glia|SCP: 3.14666571662085e-161| (7) Cortex ZG: 1.88860840145105e-158| (8) Cycling TH+: 7.4262164664459e-153| (9) Cortex X Zone: 1.02284731575273e-142| (10) E Neuroblast: 4.32524508813664e-113…	(0) E ADR Chromaffin: 8.70929180544788| (1) PN NOR Chromaffin: 9.22809351557974| (2) PN ADR Chromaffin: 8.73468593097797| (4) Macrophage: 9.96560568534526| (5) E NOR Chromaffin: 8.26295665400344| (6) E Glia|SCP: 7.18469917555982| (7) Cortex ZG: 9.42296834360235| (8) Cycling TH+: 8.94568227463732| (9) Cortex X Zone: 10.935434265183| (10) E Neuroblast: 8.51862892650757| (11) PN Sustentacular: 8.404…	(0) E ADR Chromaffin: 0.041| (1) PN NOR Chromaffin: 0.049| (2) PN ADR Chromaffin: 0.074| (4) Macrophage: 0.203| (5) E NOR Chromaffin: 0.035| (6) E Glia|SCP: 0.061| (7) Cortex ZG: 0.085| (8) Cycling TH+: 0.027| (9) Cortex X Zone: 0.038| (10) E Neuroblast: 0.032| (11) PN Sustentacular: 0.076| (12) Cortex ZF: 0.127| (13) Macrophage: 0.114| (14) Cortex ZG: 0.039| (15) Dendritic cell: 0.121| (16) T ce…
Exoc3l2	(3) Endothelial	8.55259	1.53442e-19	5.87192e-15	0.966	0.0687895	(0) E ADR Chromaffin: 4.15878788958866e-307| (1) PN NOR Chromaffin: 3.47179403694596e-271| (2) PN ADR Chromaffin: 2.9635869043513e-267| (4) Macrophage: 1.92480413788044e-188| (5) E NOR Chromaffin: 8.53167578550855e-184| (6) E Glia|SCP: 1.04139651780491e-159| (7) Cortex ZG: 7.1502835691041e-156| (8) Cycling TH+: 2.05717369004602e-149| (9) Cortex X Zone: 5.60363436142832e-139| (10) E Neuroblast: 5.…	(0) E ADR Chromaffin: 1.59148494958779e-302| (1) PN NOR Chromaffin: 1.32858614205848e-266| (2) PN ADR Chromaffin: 1.13410543655716e-262| (4) Macrophage: 7.36584047484086e-184| (5) E NOR Chromaffin: 3.26490168959841e-179| (6) E Glia|SCP: 3.98521619433584e-155| (7) Cortex ZG: 2.73627051622476e-151| (8) Cycling TH+: 7.87239227706812e-145| (9) Cortex X Zone: 2.14439879743139e-134| (10) E Neuroblast: …	(0) E ADR Chromaffin: 8.39281238558788| (1) PN NOR Chromaffin: 10.0679501890998| (2) PN ADR Chromaffin: 9.19375511400804| (4) Macrophage: 9.05017603620485| (5) E NOR Chromaffin: 10.1307440829933| (6) E Glia|SCP: 7.56096512744365| (7) Cortex ZG: 9.24798616028239| (8) Cycling TH+: 8.65056698941135| (9) Cortex X Zone: 8.9123950224911| (10) E Neuroblast: 8.02674670692092| (11) PN Sustentacular: 8.651…	(0) E ADR Chromaffin: 0.028| (1) PN NOR Chromaffin: 0.036| (2) PN ADR Chromaffin: 0.038| (4) Macrophage: 0.158| (5) E NOR Chromaffin: 0.012| (6) E Glia|SCP: 0.032| (7) Cortex ZG: 0.06| (8) Cycling TH+: 0.04| (9) Cortex X Zone: 0.062| (10) E Neuroblast: 0.016| (11) PN Sustentacular: 0.049| (12) Cortex ZF: 0.164| (13) Macrophage: 0.067| (14) Cortex ZG: 0.01| (15) Dendritic cell: 0.04| (16) T cell: …
Kdr	(3) Endothelial	8.38718	1.37403e-20	5.25813e-16	0.992	0.168316	(0) E ADR Chromaffin: 1.04808822538521e-306| (1) PN NOR Chromaffin: 1.96469623159839e-273| (2) PN ADR Chromaffin: 5.30158140206376e-271| (4) Macrophage: 5.34147141400074e-191| (5) E NOR Chromaffin: 3.36176228956217e-188| (6) E Glia|SCP: 1.23662811020228e-163| (7) Cortex ZG: 9.56497930137305e-156| (8) Cycling TH+: 1.12320869731909e-155| (9) Cortex X Zone: 4.24763732195761e-146| (10) E Neuroblast: …	(0) E ADR Chromaffin: 4.01082402090414e-302| (1) PN NOR Chromaffin: 7.51849953908071e-269| (2) PN ADR Chromaffin: 2.02880917094176e-266| (4) Macrophage: 2.0440742807098e-186| (5) E NOR Chromaffin: 1.28647919296965e-183| (6) E Glia|SCP: 4.73232845212209e-159| (7) Cortex ZG: 3.66032627904944e-151| (8) Cycling TH+: 4.29829504290068e-151| (9) Cortex X Zone: 1.62548585036674e-141| (10) E Neuroblast: 1…	(0) E ADR Chromaffin: 8.73149929651153| (1) PN NOR Chromaffin: 10.2682521506247| (2) PN ADR Chromaffin: 9.34560027168447| (4) Macrophage: 10.0695865195792| (5) E NOR Chromaffin: 8.53294904597609| (6) E Glia|SCP: 7.12922661304101| (7) Cortex ZG: 6.59841909824209| (8) Cycling TH+: 8.11106744951471| (9) Cortex X Zone: 9.80742235287588| (10) E Neuroblast: 8.7620517504888| (11) PN Sustentacular: 7.191…	(0) E ADR Chromaffin: 0.075| (1) PN NOR Chromaffin: 0.084| (2) PN ADR Chromaffin: 0.08| (4) Macrophage: 0.355| (5) E NOR Chromaffin: 0.069| (6) E Glia|SCP: 0.141| (7) Cortex ZG: 0.323| (8) Cycling TH+: 0.072| (9) Cortex X Zone: 0.071| (10) E Neuroblast: 0.068| (11) PN Sustentacular: 0.205| (12) Cortex ZF: 0.2| (13) Macrophage: 0.114| (14) Cortex ZG: 0.097| (15) Dendritic cell: 0.222| (16) T cell:…
Podxl	(3) Endothelial	7.71253	2.45728e-20	9.40352e-16	0.988	0.114105	(0) E ADR Chromaffin: 2.050606687218e-306| (1) PN NOR Chromaffin: 9.43794245856337e-276| (2) PN ADR Chromaffin: 4.45660204807724e-271| (4) Macrophage: 1.6518496290297e-193| (5) E NOR Chromaffin: 1.21649833845699e-184| (6) E Glia|SCP: 1.2739910850011e-163| (7) Cortex ZG: 7.58042149302384e-159| (8) Cycling TH+: 1.72224309046385e-151| (9) Cortex X Zone: 5.34309806122839e-146| (10) E Neuroblast: 7.69…	(0) E ADR Chromaffin: 7.84726167064584e-302| (1) PN NOR Chromaffin: 3.61171182004303e-271| (2) PN ADR Chromaffin: 1.7054524717582e-266| (4) Macrophage: 6.32129816037087e-189| (5) E NOR Chromaffin: 4.65529584160722e-180| (6) E Glia|SCP: 4.87530908408223e-159| (7) Cortex ZG: 2.90087569695036e-154| (8) Cycling TH+: 6.59067985858706e-147| (9) Cortex X Zone: 2.04469676607088e-141| (10) E Neuroblast: 2…	(0) E ADR Chromaffin: 8.04363771005621| (1) PN NOR Chromaffin: 9.01964464295553| (2) PN ADR Chromaffin: 7.9527933396486| (4) Macrophage: 9.75148937011648| (5) E NOR Chromaffin: 7.72602837030789| (6) E Glia|SCP: 7.12772003586512| (7) Cortex ZG: 7.31629280095711| (8) Cycling TH+: 6.99321837473595| (9) Cortex X Zone: 10.0561784331585| (10) E Neuroblast: 7.75209196651367| (11) PN Sustentacular: 7.495…	(0) E ADR Chromaffin: 0.065| (1) PN NOR Chromaffin: 0.06| (2) PN ADR Chromaffin: 0.063| (4) Macrophage: 0.241| (5) E NOR Chromaffin: 0.098| (6) E Glia|SCP: 0.087| (7) Cortex ZG: 0.138| (8) Cycling TH+: 0.131| (9) Cortex X Zone: 0.035| (10) E Neuroblast: 0.076| (11) PN Sustentacular: 0.134| (12) Cortex ZF: 0.1| (13) Macrophage: 0.057| (14) Cortex ZG: 0.058| (15) Dendritic cell: 0.131| (16) T cell:…
Pecam1	(3) Endothelial	8.01893	8.58848e-21	3.28664e-16	0.998	0.198158	(0) E ADR Chromaffin: 2.81991704547444e-306| (1) PN NOR Chromaffin: 6.28011355890725e-274| (2) PN ADR Chromaffin: 3.53976192456536e-262| (4) Macrophage: 2.54142443540268e-193| (5) E NOR Chromaffin: 3.2451958558594e-190| (6) E Glia|SCP: 9.08671232772309e-169| (7) Cortex ZG: 4.01275862842346e-164| (8) Cycling TH+: 6.88095928167347e-158| (9) Cortex X Zone: 1.31748164096119e-148| (10) E Neuroblast: 7…	(0) E ADR Chromaffin: 1.07912585496216e-301| (1) PN NOR Chromaffin: 2.40327385672263e-269| (2) PN ADR Chromaffin: 1.35459609329267e-257| (4) Macrophage: 9.72552302939896e-189| (5) E NOR Chromaffin: 1.24187155012027e-185| (6) E Glia|SCP: 3.47730307357307e-164| (7) Cortex ZG: 1.53560247192509e-159| (8) Cycling TH+: 2.6332054979108e-153| (9) Cortex X Zone: 5.04173874363027e-144| (10) E Neuroblast: 2…	(0) E ADR Chromaffin: 8.30366086401057| (1) PN NOR Chromaffin: 9.07247502843584| (2) PN ADR Chromaffin: 7.74523071535674| (4) Macrophage: 8.56270700159509| (5) E NOR Chromaffin: 8.72857222354471| (6) E Glia|SCP: 8.00555785751209| (7) Cortex ZG: 10.3037360289292| (8) Cycling TH+: 8.55438606517549| (9) Cortex X Zone: 10.404429406075| (10) E Neuroblast: 8.44815307463739| (11) PN Sustentacular: 9.033…	(0) E ADR Chromaffin: 0.09| (1) PN NOR Chromaffin: 0.099| (2) PN ADR Chromaffin: 0.154| (4) Macrophage: 0.382| (5) E NOR Chromaffin: 0.079| (6) E Glia|SCP: 0.07| (7) Cortex ZG: 0.12| (8) Cycling TH+: 0.075| (9) Cortex X Zone: 0.044| (10) E Neuroblast: 0.068| (11) PN Sustentacular: 0.179| (12) Cortex ZF: 0.155| (13) Macrophage: 0.257| (14) Cortex ZG: 0.078| (15) Dendritic cell: 0.434| (16) T cell:…
Cdh5	(3) Endothelial	7.41207	2.86054e-20	1.09467e-15	0.983	0.104211	(0) E ADR Chromaffin: 5.30373049049968e-303| (1) PN NOR Chromaffin: 6.55407904234687e-274| (2) PN ADR Chromaffin: 2.67225757655945e-265| (4) Macrophage: 4.26775095532168e-197| (5) E NOR Chromaffin: 3.71029108221194e-185| (6) E Glia|SCP: 1.50609249074927e-161| (7) Cortex ZG: 5.76072194446766e-161| (8) Cycling TH+: 1.1865521732469e-151| (9) Cortex X Zone: 1.0735611243033e-141| (10) E Neuroblast: 2.…	(0) E ADR Chromaffin: 2.02963158410442e-298| (1) PN NOR Chromaffin: 2.5081149679253e-269| (2) PN ADR Chromaffin: 1.02261952939777e-260| (4) Macrophage: 1.6331829355825e-192| (5) E NOR Chromaffin: 1.41985419134086e-180| (6) E Glia|SCP: 5.76351474359931e-157| (7) Cortex ZG: 2.20451307370889e-156| (8) Cycling TH+: 4.54069785658124e-147| (9) Cortex X Zone: 4.10830371048386e-137| (10) E Neuroblast: 8.…	(0) E ADR Chromaffin: 8.14535536226787| (1) PN NOR Chromaffin: 8.88047249360282| (2) PN ADR Chromaffin: 7.63794515070488| (4) Macrophage: 9.21983573877115| (5) E NOR Chromaffin: 7.83878395673479| (6) E Glia|SCP: 6.71058027066384| (7) Cortex ZG: 8.96115655017224| (8) Cycling TH+: 7.40709287516759| (9) Cortex X Zone: 7.47865526073364| (10) E Neuroblast: 8.12702186476774| (11) PN Sustentacular: 7.57…	(0) E ADR Chromaffin: 0.066| (1) PN NOR Chromaffin: 0.056| (2) PN ADR Chromaffin: 0.075| (4) Macrophage: 0.133| (5) E NOR Chromaffin: 0.051| (6) E Glia|SCP: 0.058| (7) Cortex ZG: 0.055| (8) Cycling TH+: 0.078| (9) Cortex X Zone: 0.094| (10) E Neuroblast: 0.028| (11) PN Sustentacular: 0.094| (12) Cortex ZF: 0.036| (13) Macrophage: 0.219| (14) Cortex ZG: 0.058| (15) Dendritic cell: 0.152| (16) T ce…
Ptprb	(3) Endothelial	8.68821	3.87021e-20	1.48105e-15	0.985	0.146421	(0) E ADR Chromaffin: 1.8531058878637e-302| (1) PN NOR Chromaffin: 1.08614826216363e-259| (2) PN ADR Chromaffin: 1.87845272444333e-262| (4) Macrophage: 9.6146644935788e-187| (5) E NOR Chromaffin: 6.55668537859156e-186| (6) E Glia|SCP: 1.26208721777303e-163| (7) Cortex ZG: 7.76751124632997e-160| (8) Cycling TH+: 9.71086638059601e-154| (9) Cortex X Zone: 6.6257288076464e-144| (10) E Neuroblast: 6.9…	(0) E ADR Chromaffin: 7.09146561167682e-298| (1) PN NOR Chromaffin: 4.15647216964779e-255| (2) PN ADR Chromaffin: 7.18846288589973e-258| (4) Macrophage: 3.67933980840274e-182| (5) E NOR Chromaffin: 2.50911236067942e-181| (6) E Glia|SCP: 4.82975536497385e-159| (7) Cortex ZG: 2.97247120374555e-155| (8) Cycling TH+: 3.71615434652648e-149| (9) Cortex X Zone: 2.53553390011012e-139| (10) E Neuroblast: …	(0) E ADR Chromaffin: 8.82238040095091| (1) PN NOR Chromaffin: 8.55066179860746| (2) PN ADR Chromaffin: 8.43037949238724| (4) Macrophage: 8.81465135729864| (5) E NOR Chromaffin: 8.93465830599445| (6) E Glia|SCP: 8.28173078807712| (7) Cortex ZG: 10.3544192752259| (8) Cycling TH+: 8.81175874874032| (9) Cortex X Zone: 9.50399491203647| (10) E Neuroblast: 9.80230294385447| (11) PN Sustentacular: 7.87…	(0) E ADR Chromaffin: 0.075| (1) PN NOR Chromaffin: 0.138| (2) PN ADR Chromaffin: 0.103| (4) Macrophage: 0.346| (5) E NOR Chromaffin: 0.063| (6) E Glia|SCP: 0.078| (7) Cortex ZG: 0.113| (8) Cycling TH+: 0.067| (9) Cortex X Zone: 0.074| (10) E Neuroblast: 0.056| (11) PN Sustentacular: 0.179| (12) Cortex ZF: 0.182| (13) Macrophage: 0.133| (14) Cortex ZG: 0.117| (15) Dendritic cell: 0.162| (16) T ce…
Ramp2	(3) Endothelial	7.37306	1.12247e-19	4.29546e-15	0.961	0.121789	(0) E ADR Chromaffin: 1.59748591011988e-298| (1) PN NOR Chromaffin: 1.18961531758104e-264| (2) PN ADR Chromaffin: 1.10804921373202e-263| (4) Macrophage: 8.35172768218033e-187| (5) E NOR Chromaffin: 1.97377861285591e-176| (6) E Glia|SCP: 1.44920941756427e-137| (7) Cortex ZG: 1.2713914824518e-153| (8) Cycling TH+: 8.40665977808427e-147| (9) Cortex X Zone: 1.3205955178777e-138| (10) E Neuroblast: 2.…	(0) E ADR Chromaffin: 6.11325908084676e-294| (1) PN NOR Chromaffin: 4.55241989731913e-260| (2) PN ADR Chromaffin: 4.24028273110968e-259| (4) Macrophage: 3.19603914941677e-182| (5) E NOR Chromaffin: 7.55325599567699e-172| (6) E Glia|SCP: 5.54583459913494e-133| (7) Cortex ZG: 4.86536092504653e-149| (8) Cycling TH+: 3.21706056387729e-142| (9) Cortex X Zone: 5.05365492781439e-134| (10) E Neuroblast: …	(0) E ADR Chromaffin: 8.11052744248093| (1) PN NOR Chromaffin: 8.35768261083617| (2) PN ADR Chromaffin: 8.69011197893106| (4) Macrophage: 9.15548625604487| (5) E NOR Chromaffin: 7.3171603557841| (6) E Glia|SCP: 4.60907607738195| (7) Cortex ZG: 8.13529516779001| (8) Cycling TH+: 7.32775795319105| (9) Cortex X Zone: 9.14852661691423| (10) E Neuroblast: 7.87048530769213| (11) PN Sustentacular: 1.672…	(0) E ADR Chromaffin: 0.047| (1) PN NOR Chromaffin: 0.052| (2) PN ADR Chromaffin: 0.045| (4) Macrophage: 0.158| (5) E NOR Chromaffin: 0.073| (6) E Glia|SCP: 0.294| (7) Cortex ZG: 0.07| (8) Cycling TH+: 0.053| (9) Cortex X Zone: 0.044| (10) E Neuroblast: 0.052| (11) PN Sustentacular: 0.741| (12) Cortex ZF: 0.064| (13) Macrophage: 0.086| (14) Cortex ZG: 0.029| (15) Dendritic cell: 0.091| (16) T cel…
Fam167b	(3) Endothelial	8.3808	9.76433e-20	3.73661e-15	0.966	0.0578421	(0) E ADR Chromaffin: 2.48093907948174e-298| (1) PN NOR Chromaffin: 4.84900396519863e-274| (2) PN ADR Chromaffin: 1.58878842198659e-269| (4) Macrophage: 9.6371725034868e-190| (5) E NOR Chromaffin: 7.1053706182989e-180| (6) E Glia|SCP: 8.67723606905868e-159| (7) Cortex ZG: 5.92893366017033e-157| (8) Cycling TH+: 1.82704172129722e-148| (9) Cortex X Zone: 3.53812932209077e-140| (10) E Neuroblast: 5.…	(0) E ADR Chromaffin: 9.49405766936071e-294| (1) PN NOR Chromaffin: 1.85561683740221e-269| (2) PN ADR Chromaffin: 6.07997553325829e-265| (4) Macrophage: 3.68795317363433e-185| (5) E NOR Chromaffin: 2.71908322821062e-175| (6) E Glia|SCP: 3.32060469890738e-154| (7) Cortex ZG: 2.26888433307398e-152| (8) Cycling TH+: 6.9917232590602e-144| (9) Cortex X Zone: 1.3539713289777e-135| (10) E Neuroblast: 2.…	(0) E ADR Chromaffin: 7.77265007411401| (1) PN NOR Chromaffin: 9.85138419088487| (2) PN ADR Chromaffin: 9.73585605393647| (4) Macrophage: 8.71003547339073| (5) E NOR Chromaffin: 7.79404330257655| (6) E Glia|SCP: 7.48839177946221| (7) Cortex ZG: 9.99363339796576| (8) Cycling TH+: 7.62598671587276| (9) Cortex X Zone: 9.14030789434407| (10) E Neuroblast: 8.31704058815176| (11) PN Sustentacular: 9.90…	(0) E ADR Chromaffin: 0.054| (1) PN NOR Chromaffin: 0.025| (2) PN ADR Chromaffin: 0.03| (4) Macrophage: 0.14| (5) E NOR Chromaffin: 0.053| (6) E Glia|SCP: 0.049| (7) Cortex ZG: 0.043| (8) Cycling TH+: 0.051| (9) Cortex X Zone: 0.032| (10) E Neuroblast: 0.032| (11) PN Sustentacular: 0.058| (12) Cortex ZF: 0.036| (13) Macrophage: 0.076| (14) Cortex ZG: 0.049| (15) Dendritic cell: 0.071| (16) T cell…
Eng	(3) Endothelial	7.39639	9.139e-21	3.49731e-16	0.995	0.329737	(0) E ADR Chromaffin: 6.9728745102531e-293| (1) PN NOR Chromaffin: 6.75700331898069e-255| (2) PN ADR Chromaffin: 1.54779510197448e-261| (4) Macrophage: 8.57742860524084e-187| (5) E NOR Chromaffin: 3.30537369185213e-187| (6) E Glia|SCP: 1.97976090452872e-151| (7) Cortex ZG: 7.90485202003864e-162| (8) Cycling TH+: 3.61995429137437e-156| (9) Cortex X Zone: 4.77388850465811e-146| (10) E Neuroblast: 5…	(0) E ADR Chromaffin: 2.66837961758366e-288| (1) PN NOR Chromaffin: 2.58577003010753e-250| (2) PN ADR Chromaffin: 5.92310229623595e-257| (4) Macrophage: 3.28241037865356e-182| (5) E NOR Chromaffin: 1.26490040439797e-182| (6) E Glia|SCP: 7.5761490294505e-147| (7) Cortex ZG: 3.02502877102839e-157| (8) Cycling TH+: 1.38528410822314e-151| (9) Cortex X Zone: 1.82687165296257e-141| (10) E Neuroblast: 2…	(0) E ADR Chromaffin: 8.46237039322694| (1) PN NOR Chromaffin: 8.27988915963575| (2) PN ADR Chromaffin: 8.79644983786969| (4) Macrophage: 6.5687833807761| (5) E NOR Chromaffin: 8.76643923528451| (6) E Glia|SCP: 3.7145778132108| (7) Cortex ZG: 9.34391189487767| (8) Cycling TH+: 8.46531027857139| (9) Cortex X Zone: 9.59214023236054| (10) E Neuroblast: 9.22618566538817| (11) PN Sustentacular: 3.8046…	(0) E ADR Chromaffin: 0.144| (1) PN NOR Chromaffin: 0.225| (2) PN ADR Chromaffin: 0.152| (4) Macrophage: 0.578| (5) E NOR Chromaffin: 0.12| (6) E Glia|SCP: 0.818| (7) Cortex ZG: 0.165| (8) Cycling TH+: 0.11| (9) Cortex X Zone: 0.124| (10) E Neuroblast: 0.092| (11) PN Sustentacular: 0.696| (12) Cortex ZF: 0.245| (13) Macrophage: 0.438| (14) Cortex ZG: 0.136| (15) Dendritic cell: 0.323| (16) T cell…
Rgcc	(3) Endothelial	7.84884	7.18345e-20	2.74896e-15	0.975	0.259	(0) E ADR Chromaffin: 4.02772932520478e-288| (1) PN NOR Chromaffin: 1.73960499797562e-253| (2) PN ADR Chromaffin: 1.50395142155191e-253| (4) Macrophage: 3.59967003246636e-178| (5) E NOR Chromaffin: 5.73357766507769e-179| (6) E Glia|SCP: 1.52283910680146e-152| (7) Cortex ZG: 5.52364384153196e-151| (8) Cycling TH+: 1.13851768545169e-148| (9) Cortex X Zone: 1.42103264582257e-140| (10) E Neuroblast: …	(0) E ADR Chromaffin: 1.54133145816937e-283| (1) PN NOR Chromaffin: 6.6571204062531e-249| (2) PN ADR Chromaffin: 5.75532129999484e-249| (4) Macrophage: 1.37752172802423e-173| (5) E NOR Chromaffin: 2.19412550087193e-174| (6) E Glia|SCP: 5.82760069390782e-148| (7) Cortex ZG: 2.11378802527745e-146| (8) Cycling TH+: 4.35687947868653e-144| (9) Cortex X Zone: 5.43800772903382e-136| (10) E Neuroblast: 1…	(0) E ADR Chromaffin: 8.85792758778744| (1) PN NOR Chromaffin: 8.5716366632355| (2) PN ADR Chromaffin: 9.08697804314277| (4) Macrophage: 9.54259440461993| (5) E NOR Chromaffin: 8.54102157121791| (6) E Glia|SCP: 6.96116846011612| (7) Cortex ZG: 7.93842433785425| (8) Cycling TH+: 8.43839104374296| (9) Cortex X Zone: 10.1792306571559| (10) E Neuroblast: 9.64111704497777| (11) PN Sustentacular: 6.023…	(0) E ADR Chromaffin: 0.11| (1) PN NOR Chromaffin: 0.144| (2) PN ADR Chromaffin: 0.13| (4) Macrophage: 0.458| (5) E NOR Chromaffin: 0.116| (6) E Glia|SCP: 0.243| (7) Cortex ZG: 0.248| (8) Cycling TH+: 0.12| (9) Cortex X Zone: 0.097| (10) E Neuroblast: 0.084| (11) PN Sustentacular: 0.375| (12) Cortex ZF: 0.818| (13) Macrophage: 0.162| (14) Cortex ZG: 0.126| (15) Dendritic cell: 0.283| (16) T cell:…
Robo4	(3) Endothelial	8.23646	2.23967e-18	8.57076e-14	0.931	0.0725263	(0) E ADR Chromaffin: 6.65554154684598e-287| (1) PN NOR Chromaffin: 3.76732468525669e-256| (2) PN ADR Chromaffin: 1.56700204646547e-251| (4) Macrophage: 1.07310583405219e-173| (5) E NOR Chromaffin: 6.72351342491925e-172| (6) E Glia|SCP: 4.01350066415495e-149| (7) Cortex ZG: 1.57751635204054e-141| (8) Cycling TH+: 9.27273728008807e-140| (9) Cortex X Zone: 6.80144593459796e-130| (10) E Neuroblast: …	(0) E ADR Chromaffin: 2.54694263914702e-282| (1) PN NOR Chromaffin: 1.44167981055403e-251| (2) PN ADR Chromaffin: 5.99660343141407e-247| (4) Macrophage: 4.10656140575093e-169| (5) E NOR Chromaffin: 2.5729541174481e-167| (6) E Glia|SCP: 1.53588643415881e-144| (7) Cortex ZG: 6.03683957598872e-137| (8) Cycling TH+: 3.5484911023441e-135| (9) Cortex X Zone: 2.60277733025195e-125| (10) E Neuroblast: 1.…	(0) E ADR Chromaffin: 8.10697371193027| (1) PN NOR Chromaffin: 9.36439388622003| (2) PN ADR Chromaffin: 9.34152482921305| (4) Macrophage: 8.95528502702941| (5) E NOR Chromaffin: 9.12596462257298| (6) E Glia|SCP: 7.38752938917728| (7) Cortex ZG: 7.33945055000105| (8) Cycling TH+: 8.08527948851943| (9) Cortex X Zone: 8.54014385850017| (10) E Neuroblast: 9.00655986225663| (11) PN Sustentacular: 9.53…	(0) E ADR Chromaffin: 0.034| (1) PN NOR Chromaffin: 0.033| (2) PN ADR Chromaffin: 0.038| (4) Macrophage: 0.169| (5) E NOR Chromaffin: 0.02| (6) E Glia|SCP: 0.029| (7) Cortex ZG: 0.1| (8) Cycling TH+: 0.029| (9) Cortex X Zone: 0.044| (10) E Neuroblast: 0.02| (11) PN Sustentacular: 0.076| (12) Cortex ZF: 0.073| (13) Macrophage: 0.076| (14) Cortex ZG: 0.146| (15) Dendritic cell: 0.081| (16) T cell: …
Cd93	(3) Endothelial	6.54286	1.27691e-13	4.88648e-09	0.926	0.170737	(0) E ADR Chromaffin: 1.60927323941748e-284| (1) PN NOR Chromaffin: 6.05868128506534e-250| (2) PN ADR Chromaffin: 1.2726916931646e-244| (4) Macrophage: 8.01668568880673e-35| (5) E NOR Chromaffin: 2.39827076037481e-166| (6) E Glia|SCP: 2.9457185805116e-147| (7) Cortex ZG: 9.79006322409138e-143| (8) Cycling TH+: 1.12801371256854e-133| (9) Cortex X Zone: 5.04617340943928e-129| (10) E Neuroblast: 4.3…	(0) E ADR Chromaffin: 6.1583668326028e-280| (1) PN NOR Chromaffin: 2.3185361541688e-245| (2) PN ADR Chromaffin: 4.87033657140231e-240| (4) Macrophage: 3.06782527939256e-30| (5) E NOR Chromaffin: 9.17770254580232e-162| (6) E Glia|SCP: 1.12726758639018e-142| (7) Cortex ZG: 3.74646139459529e-138| (8) Cycling TH+: 4.31668287525729e-129| (9) Cortex X Zone: 1.93106964032422e-124| (10) E Neuroblast: 1.6…	(0) E ADR Chromaffin: 8.60512698508673| (1) PN NOR Chromaffin: 8.69263031311846| (2) PN ADR Chromaffin: 7.09439524507708| (4) Macrophage: 1.14514949906819| (5) E NOR Chromaffin: 7.77670625274237| (6) E Glia|SCP: 6.94580260714806| (7) Cortex ZG: 8.63345642355754| (8) Cycling TH+: 6.62299390595784| (9) Cortex X Zone: 8.65381514950343| (10) E Neuroblast: 7.62811326876453| (11) PN Sustentacular: 8.37…	(0) E ADR Chromaffin: 0.037| (1) PN NOR Chromaffin: 0.047| (2) PN ADR Chromaffin: 0.05| (4) Macrophage: 0.804| (5) E NOR Chromaffin: 0.049| (6) E Glia|SCP: 0.032| (7) Cortex ZG: 0.078| (8) Cycling TH+: 0.078| (9) Cortex X Zone: 0.041| (10) E Neuroblast: 0.056| (11) PN Sustentacular: 0.085| (12) Cortex ZF: 0.055| (13) Macrophage: 0.924| (14) Cortex ZG: 0.039| (15) Dendritic cell: 0.242| (16) T cel…
RP23-310J6.1	(3) Endothelial	6.94484	2.03871e-18	7.80174e-14	0.939	0.193105	(0) E ADR Chromaffin: 8.77851820995524e-283| (1) PN NOR Chromaffin: 2.20023302221029e-260| (2) PN ADR Chromaffin: 3.69274335526311e-255| (4) Macrophage: 9.98958625411923e-173| (5) E NOR Chromaffin: 1.50255851512952e-173| (6) E Glia|SCP: 1.24793467562284e-132| (7) Cortex ZG: 5.03694356426998e-99| (8) Cycling TH+: 2.47686176936217e-138| (9) Cortex X Zone: 1.05036193179385e-129| (10) E Neuroblast: 4…	(0) E ADR Chromaffin: 3.35936334858567e-278| (1) PN NOR Chromaffin: 8.41985172939433e-256| (2) PN ADR Chromaffin: 1.41313902719209e-250| (4) Macrophage: 3.82281486772635e-168| (5) E NOR Chromaffin: 5.74999092569767e-169| (6) E Glia|SCP: 4.7755964166735e-128| (7) Cortex ZG: 1.92753756317484e-94| (8) Cycling TH+: 9.47845461899516e-134| (9) Cortex X Zone: 4.0195250405887e-125| (10) E Neuroblast: 1.8…	(0) E ADR Chromaffin: 8.39311802405961| (1) PN NOR Chromaffin: 10.5718969969431| (2) PN ADR Chromaffin: 9.76498629973899| (4) Macrophage: 6.84539372273098| (5) E NOR Chromaffin: 9.07700448383905| (6) E Glia|SCP: 4.59328217819801| (7) Cortex ZG: 3.09697292173065| (8) Cycling TH+: 7.21721245466374| (9) Cortex X Zone: 7.42011873602289| (10) E Neuroblast: 7.86433976996964| (11) PN Sustentacular: 4.61…	(0) E ADR Chromaffin: 0.062| (1) PN NOR Chromaffin: 0.034| (2) PN ADR Chromaffin: 0.042| (4) Macrophage: 0.197| (5) E NOR Chromaffin: 0.033| (6) E Glia|SCP: 0.228| (7) Cortex ZG: 0.627| (8) Cycling TH+: 0.094| (9) Cortex X Zone: 0.091| (10) E Neuroblast: 0.068| (11) PN Sustentacular: 0.21| (12) Cortex ZF: 0.118| (13) Macrophage: 0.095| (14) Cortex ZG: 0.864| (15) Dendritic cell: 0.101| (16) T cel…
Thbd	(3) Endothelial	7.79646	7.49624e-17	2.86866e-12	0.899	0.111158	(0) E ADR Chromaffin: 2.18711057935129e-282| (1) PN NOR Chromaffin: 1.14252426607895e-244| (2) PN ADR Chromaffin: 9.00709488207396e-239| (4) Macrophage: 3.58492915415453e-149| (5) E NOR Chromaffin: 5.596803303831e-162| (6) E Glia|SCP: 1.36941305640575e-140| (7) Cortex ZG: 2.00488462515841e-134| (8) Cycling TH+: 4.06707036327812e-132| (9) Cortex X Zone: 1.64922183804622e-114| (10) E Neuroblast: 5.…	(0) E ADR Chromaffin: 8.36963476506154e-278| (1) PN NOR Chromaffin: 4.37221186143091e-240| (2) PN ADR Chromaffin: 3.44683506947206e-234| (4) Macrophage: 1.37188068871186e-144| (5) E NOR Chromaffin: 2.14178468831005e-157| (6) E Glia|SCP: 5.24046988425352e-136| (7) Cortex ZG: 7.67229248355621e-130| (8) Cycling TH+: 1.55638648661927e-127| (9) Cortex X Zone: 6.31124212983528e-110| (10) E Neuroblast: …	(0) E ADR Chromaffin: 10.3845612979416| (1) PN NOR Chromaffin: 9.65337916950969| (2) PN ADR Chromaffin: 7.69415001141209| (4) Macrophage: 6.39631975823387| (5) E NOR Chromaffin: 9.48912145285296| (6) E Glia|SCP: 8.02066595566524| (7) Cortex ZG: 7.78922873591948| (8) Cycling TH+: 9.28572256062208| (9) Cortex X Zone: 6.89931739514626| (10) E Neuroblast: 8.8070466851481| (11) PN Sustentacular: 8.913…	(0) E ADR Chromaffin: 0.013| (1) PN NOR Chromaffin: 0.026| (2) PN ADR Chromaffin: 0.034| (4) Macrophage: 0.239| (5) E NOR Chromaffin: 0.022| (6) E Glia|SCP: 0.032| (7) Cortex ZG: 0.073| (8) Cycling TH+: 0.029| (9) Cortex X Zone: 0.129| (10) E Neuroblast: 0.028| (11) PN Sustentacular: 0.071| (12) Cortex ZF: 0.045| (13) Macrophage: 0.171| (14) Cortex ZG: 0.058| (15) Dendritic cell: 0.222| (16) T ce…
Cd34	(3) Endothelial	7.56152	7.4575e-14	2.85384e-09	0.928	0.124842	(0) E ADR Chromaffin: 5.37680251246116e-280| (1) PN NOR Chromaffin: 2.45376783989068e-246| (2) PN ADR Chromaffin: 4.67657754657572e-244| (4) Macrophage: 1.2351467704536e-165| (5) E NOR Chromaffin: 1.19944650184156e-167| (6) E Glia|SCP: 1.43563615293789e-148| (7) Cortex ZG: 2.11596721276072e-140| (8) Cycling TH+: 4.69105586082054e-133| (9) Cortex X Zone: 3.10731782017594e-129| (10) E Neuroblast: 1…	(0) E ADR Chromaffin: 2.05759478546864e-275| (1) PN NOR Chromaffin: 9.39007876969365e-242| (2) PN ADR Chromaffin: 1.7896326955236e-239| (4) Macrophage: 4.72665966117184e-161| (5) E NOR Chromaffin: 4.59004187324727e-163| (6) E Glia|SCP: 5.49389243006272e-144| (7) Cortex ZG: 8.09738332979273e-136| (8) Cycling TH+: 1.79517325681881e-128| (9) Cortex X Zone: 1.18910838342493e-124| (10) E Neuroblast: 5…	(0) E ADR Chromaffin: 8.36195047457215| (1) PN NOR Chromaffin: 8.79556158879289| (2) PN ADR Chromaffin: 8.25996262401435| (4) Macrophage: 7.2292600710297| (5) E NOR Chromaffin: 8.55717809337828| (6) E Glia|SCP: 8.31353610238553| (7) Cortex ZG: 8.71804138203975| (8) Cycling TH+: 5.73205258822123| (9) Cortex X Zone: 9.25319396956057| (10) E Neuroblast: 8.64636978553483| (11) PN Sustentacular: 7.440…	(0) E ADR Chromaffin: 0.052| (1) PN NOR Chromaffin: 0.065| (2) PN ADR Chromaffin: 0.06| (4) Macrophage: 0.228| (5) E NOR Chromaffin: 0.051| (6) E Glia|SCP: 0.041| (7) Cortex ZG: 0.133| (8) Cycling TH+: 0.067| (9) Cortex X Zone: 0.053| (10) E Neuroblast: 0.04| (11) PN Sustentacular: 0.062| (12) Cortex ZF: 0.118| (13) Macrophage: 0.086| (14) Cortex ZG: 0.117| (15) Dendritic cell: 0.273| (16) T cell…
Tgfbr2	(3) Endothelial	4.31591	2.1381e-15	8.18208e-11	0.939	0.495789	(0) E ADR Chromaffin: 6.34735698173888e-280| (1) PN NOR Chromaffin: 7.29220714223459e-251| (2) PN ADR Chromaffin: 1.33541274727379e-246| (4) Macrophage: 2.54322405126889e-52| (5) E NOR Chromaffin: 2.27896862334008e-169| (6) E Glia|SCP: 1.31459172176142e-37| (7) Cortex ZG: 3.77283392319121e-112| (8) Cycling TH+: 4.38743221897162e-136| (9) Cortex X Zone: 2.36438590780384e-104| (10) E Neuroblast: 7.…	(0) E ADR Chromaffin: 2.42900656977183e-275| (1) PN NOR Chromaffin: 2.79058182919033e-246| (2) PN ADR Chromaffin: 5.11035750126733e-242| (4) Macrophage: 9.73240979939579e-48| (5) E NOR Chromaffin: 8.7211571277978e-165| (6) E Glia|SCP: 5.03067960083659e-33| (7) Cortex ZG: 1.44378808572681e-107| (8) Cycling TH+: 1.67898256155606e-131| (9) Cortex X Zone: 9.04803199198375e-100| (10) E Neuroblast: 2.7…	(0) E ADR Chromaffin: 7.83017191228361| (1) PN NOR Chromaffin: 8.87246612184423| (2) PN ADR Chromaffin: 8.51813358372176| (4) Macrophage: 1.52876557675915| (5) E NOR Chromaffin: 7.7777631339922| (6) E Glia|SCP: 1.37550431807066| (7) Cortex ZG: 4.10925767796448| (8) Cycling TH+: 6.4397326789474| (9) Cortex X Zone: 4.58805949369242| (10) E Neuroblast: 7.93283149885372| (11) PN Sustentacular: 1.4224…	(0) E ADR Chromaffin: 0.065| (1) PN NOR Chromaffin: 0.067| (2) PN ADR Chromaffin: 0.072| (4) Macrophage: 0.871| (5) E NOR Chromaffin: 0.063| (6) E Glia|SCP: 0.925| (7) Cortex ZG: 0.486| (8) Cycling TH+: 0.096| (9) Cortex X Zone: 0.497| (10) E Neuroblast: 0.06| (11) PN Sustentacular: 0.862| (12) Cortex ZF: 0.809| (13) Macrophage: 0.876| (14) Cortex ZG: 0.583| (15) Dendritic cell: 0.697| (16) T cel…
Calcrl	(3) Endothelial	6.77872	2.55851e-15	9.79091e-11	0.907	0.108632	(0) E ADR Chromaffin: 7.76443237203347e-279| (1) PN NOR Chromaffin: 4.76916341731134e-217| (2) PN ADR Chromaffin: 2.7134213897807e-241| (4) Macrophage: 3.56863073777032e-134| (5) E NOR Chromaffin: 2.79700574312575e-158| (6) E Glia|SCP: 6.01039463609037e-142| (7) Cortex ZG: 1.76477188220527e-139| (8) Cycling TH+: 9.28520941065941e-127| (9) Cortex X Zone: 1.32093741543872e-125| (10) E Neuroblast: 4…	(0) E ADR Chromaffin: 2.97129298012977e-274| (1) PN NOR Chromaffin: 1.82506345653671e-212| (2) PN ADR Chromaffin: 1.03837209744128e-236| (4) Macrophage: 1.36564361072995e-129| (5) E NOR Chromaffin: 1.07035815777936e-153| (6) E Glia|SCP: 2.30005781933906e-137| (7) Cortex ZG: 6.75342903882311e-135| (8) Cycling TH+: 3.55326393727114e-122| (9) Cortex X Zone: 5.05496330140091e-121| (10) E Neuroblast: …	(0) E ADR Chromaffin: 8.90984132918206| (1) PN NOR Chromaffin: 6.30582997258286| (2) PN ADR Chromaffin: 9.53337185173952| (4) Macrophage: 4.33926192280604| (5) E NOR Chromaffin: 7.16405389223037| (6) E Glia|SCP: 6.85732232249319| (7) Cortex ZG: 9.29097604326689| (8) Cycling TH+: 6.75060524663457| (9) Cortex X Zone: 8.66993032550676| (10) E Neuroblast: 7.78802120790124| (11) PN Sustentacular: 9.40…	(0) E ADR Chromaffin: 0.029| (1) PN NOR Chromaffin: 0.117| (2) PN ADR Chromaffin: 0.041| (4) Macrophage: 0.276| (5) E NOR Chromaffin: 0.055| (6) E Glia|SCP: 0.027| (7) Cortex ZG: 0.055| (8) Cycling TH+: 0.096| (9) Cortex X Zone: 0.021| (10) E Neuroblast: 0.032| (11) PN Sustentacular: 0.022| (12) Cortex ZF: 0.036| (13) Macrophage: 0.314| (14) Cortex ZG: 0.049| (15) Dendritic cell: 0.152| (16) T ce…
Flt4	(3) Endothelial	7.31178	9.42482e-18	3.60669e-13	0.911	0.0645789	(0) E ADR Chromaffin: 7.25738274379512e-278| (1) PN NOR Chromaffin: 1.19650126381829e-245| (2) PN ADR Chromaffin: 1.07184938989178e-241| (4) Macrophage: 8.80937110026294e-169| (5) E NOR Chromaffin: 1.94663005205415e-165| (6) E Glia|SCP: 8.51292998705045e-141| (7) Cortex ZG: 1.24506625386566e-131| (8) Cycling TH+: 4.13962022677767e-132| (9) Cortex X Zone: 3.73081995662444e-125| (10) E Neuroblast: …	(0) E ADR Chromaffin: 2.77725522839552e-273| (1) PN NOR Chromaffin: 4.57877103637985e-241| (2) PN ADR Chromaffin: 4.10175324523785e-237| (4) Macrophage: 3.37117013264862e-164| (5) E NOR Chromaffin: 7.44936388320083e-161| (6) E Glia|SCP: 3.25772804744447e-136| (7) Cortex ZG: 4.76461954029311e-127| (8) Cycling TH+: 1.58414986838328e-127| (9) Cortex X Zone: 1.42771018100104e-120| (10) E Neuroblast: …	(0) E ADR Chromaffin: 8.31392785881792| (1) PN NOR Chromaffin: 8.55694251363402| (2) PN ADR Chromaffin: 7.84290063524066| (4) Macrophage: 7.36599560654978| (5) E NOR Chromaffin: 8.34788754394469| (6) E Glia|SCP: 6.39345982663382| (7) Cortex ZG: 5.82860196489457| (8) Cycling TH+: 7.03094361732855| (9) Cortex X Zone: 8.55613736436407| (10) E Neuroblast: 7.27053931035411| (11) PN Sustentacular: 6.78…	(0) E ADR Chromaffin: 0.036| (1) PN NOR Chromaffin: 0.039| (2) PN ADR Chromaffin: 0.039| (4) Macrophage: 0.12| (5) E NOR Chromaffin: 0.02| (6) E Glia|SCP: 0.049| (7) Cortex ZG: 0.108| (8) Cycling TH+: 0.053| (9) Cortex X Zone: 0.047| (10) E Neuroblast: 0.044| (11) PN Sustentacular: 0.049| (12) Cortex ZF: 0.064| (13) Macrophage: 0.076| (14) Cortex ZG: 0.146| (15) Dendritic cell: 0.081| (16) T cell…
S1pr1	(3) Endothelial	6.73835	2.96744e-17	1.13558e-12	0.901	0.121263	(0) E ADR Chromaffin: 2.63408911032018e-277| (1) PN NOR Chromaffin: 8.94402942501035e-242| (2) PN ADR Chromaffin: 7.89432797816886e-243| (4) Macrophage: 3.18179300490574e-118| (5) E NOR Chromaffin: 5.57736328830316e-159| (6) E Glia|SCP: 1.36951031743316e-139| (7) Cortex ZG: 9.8539975255197e-137| (8) Cycling TH+: 7.22743696781272e-131| (9) Cortex X Zone: 1.29420877577465e-123| (10) E Neuroblast: 1…	(0) E ADR Chromaffin: 1.00801322073733e-272| (1) PN NOR Chromaffin: 3.42270118036296e-237| (2) PN ADR Chromaffin: 3.02100143068566e-238| (4) Macrophage: 1.21760854711733e-113| (5) E NOR Chromaffin: 2.13434538316785e-154| (6) E Glia|SCP: 5.24084208275322e-135| (7) Cortex ZG: 3.77092777306588e-132| (8) Cycling TH+: 2.76579557884257e-126| (9) Cortex X Zone: 4.95267814313442e-119| (10) E Neuroblast: …	(0) E ADR Chromaffin: 9.06243858298429| (1) PN NOR Chromaffin: 8.81552892700426| (2) PN ADR Chromaffin: 9.87767942303986| (4) Macrophage: 3.38067910968579| (5) E NOR Chromaffin: 7.2255588852274| (6) E Glia|SCP: 7.25410305864916| (7) Cortex ZG: 9.0261779966059| (8) Cycling TH+: 7.32475941038494| (9) Cortex X Zone: 8.67589142174134| (10) E Neuroblast: 7.82881424704048| (11) PN Sustentacular: 8.0076…	(0) E ADR Chromaffin: 0.025| (1) PN NOR Chromaffin: 0.036| (2) PN ADR Chromaffin: 0.024| (4) Macrophage: 0.325| (5) E NOR Chromaffin: 0.037| (6) E Glia|SCP: 0.039| (7) Cortex ZG: 0.063| (8) Cycling TH+: 0.032| (9) Cortex X Zone: 0.026| (10) E Neuroblast: 0.032| (11) PN Sustentacular: 0.071| (12) Cortex ZF: 0.045| (13) Macrophage: 0.619| (14) Cortex ZG: 0.058| (15) Dendritic cell: 0.121| (16) T ce…
Dysf	(3) Endothelial	6.44529	2.47896e-18	9.4865e-14	0.931	0.138789	(0) E ADR Chromaffin: 1.51393163539905e-273| (1) PN NOR Chromaffin: 1.21974133385351e-236| (2) PN ADR Chromaffin: 1.21224777570104e-219| (4) Macrophage: 1.6186017024897e-177| (5) E NOR Chromaffin: 4.75768466139746e-166| (6) E Glia|SCP: 5.19640168069655e-141| (7) Cortex ZG: 5.13856554807783e-136| (8) Cycling TH+: 9.93621552129214e-135| (9) Cortex X Zone: 1.26040897528629e-53| (10) E Neuroblast: 1.…	(0) E ADR Chromaffin: 5.79351358234509e-269| (1) PN NOR Chromaffin: 4.66770613639063e-232| (2) PN ADR Chromaffin: 4.63902978805276e-215| (4) Macrophage: 6.19406499508758e-173| (5) E NOR Chromaffin: 1.82067076622358e-161| (6) E Glia|SCP: 1.98855899516895e-136| (7) Cortex ZG: 1.96642626393843e-131| (8) Cycling TH+: 3.80239095568807e-130| (9) Cortex X Zone: 4.82333306662557e-49| (10) E Neuroblast: 5…	(0) E ADR Chromaffin: 7.09286409471458| (1) PN NOR Chromaffin: 7.60900992197215| (2) PN ADR Chromaffin: 6.18004382211761| (4) Macrophage: 8.45440840516102| (5) E NOR Chromaffin: 7.44820141527068| (6) E Glia|SCP: 5.95972325375978| (7) Cortex ZG: 5.87360203285511| (8) Cycling TH+: 7.06722426563085| (9) Cortex X Zone: 2.33555858822388| (10) E Neuroblast: 7.01933283179987| (11) PN Sustentacular: 7.11…	(0) E ADR Chromaffin: 0.061| (1) PN NOR Chromaffin: 0.103| (2) PN ADR Chromaffin: 0.145| (4) Macrophage: 0.115| (5) E NOR Chromaffin: 0.057| (6) E Glia|SCP: 0.08| (7) Cortex ZG: 0.098| (8) Cycling TH+: 0.083| (9) Cortex X Zone: 0.638| (10) E Neuroblast: 0.064| (11) PN Sustentacular: 0.134| (12) Cortex ZF: 0.364| (13) Macrophage: 0.19| (14) Cortex ZG: 0.165| (15) Dendritic cell: 0.071| (16) T cell…
Arap3	(3) Endothelial	5.69717	2.78663e-14	1.06639e-09	0.911	0.200579	(0) E ADR Chromaffin: 3.58962799238804e-273| (1) PN NOR Chromaffin: 8.58786829319581e-245| (2) PN ADR Chromaffin: 1.63331514330627e-238| (4) Macrophage: 2.5503560627626e-68| (5) E NOR Chromaffin: 1.33376969801257e-160| (6) E Glia|SCP: 6.38793844741307e-58| (7) Cortex ZG: 4.08733864903495e-140| (8) Cycling TH+: 8.20128742360056e-133| (9) Cortex X Zone: 4.067986089647e-126| (10) E Neuroblast: 4.535…	(0) E ADR Chromaffin: 1.37367884012706e-268| (1) PN NOR Chromaffin: 3.28640543844017e-240| (2) PN ADR Chromaffin: 6.25037039040443e-234| (4) Macrophage: 9.75970258097993e-64| (5) E NOR Chromaffin: 5.10406988035449e-156| (6) E Glia|SCP: 2.44453628505603e-53| (7) Cortex ZG: 1.5641427542127e-135| (8) Cycling TH+: 3.13846867126346e-128| (9) Cortex X Zone: 1.55673691678611e-121| (10) E Neuroblast: 1.7…	(0) E ADR Chromaffin: 7.33030743182006| (1) PN NOR Chromaffin: 8.45816403005945| (2) PN ADR Chromaffin: 7.89922427866162| (4) Macrophage: 1.96064047341563| (5) E NOR Chromaffin: 6.8926972649687| (6) E Glia|SCP: 1.95663485903664| (7) Cortex ZG: 8.85831154843033| (8) Cycling TH+: 7.1539961938923| (9) Cortex X Zone: 9.3125290777275| (10) E Neuroblast: 7.71639222580432| (11) PN Sustentacular: 4.15599…	(0) E ADR Chromaffin: 0.042| (1) PN NOR Chromaffin: 0.041| (2) PN ADR Chromaffin: 0.051| (4) Macrophage: 0.618| (5) E NOR Chromaffin: 0.049| (6) E Glia|SCP: 0.583| (7) Cortex ZG: 0.058| (8) Cycling TH+: 0.045| (9) Cortex X Zone: 0.035| (10) E Neuroblast: 0.028| (11) PN Sustentacular: 0.196| (12) Cortex ZF: 0.082| (13) Macrophage: 0.676| (14) Cortex ZG: 0.029| (15) Dendritic cell: 0.273| (16) T ce…
Sox18	(3) Endothelial	8.24823	7.26569e-18	2.78044e-13	0.914	0.0605789	(0) E ADR Chromaffin: 4.27824622796294e-273| (1) PN NOR Chromaffin: 3.57769946908873e-248| (2) PN ADR Chromaffin: 5.69595418034109e-243| (4) Macrophage: 1.81666842376308e-168| (5) E NOR Chromaffin: 1.11083882939465e-166| (6) E Glia|SCP: 9.2586841773712e-144| (7) Cortex ZG: 1.63780559790931e-142| (8) Cycling TH+: 1.41440812697371e-132| (9) Cortex X Zone: 1.81955534185469e-127| (10) E Neuroblast: 2…	(0) E ADR Chromaffin: 1.63719926651686e-268| (1) PN NOR Chromaffin: 1.36911403283087e-243| (2) PN ADR Chromaffin: 2.17972774573293e-238| (4) Macrophage: 6.95202672405655e-164| (5) E NOR Chromaffin: 4.25095803232745e-162| (6) E Glia|SCP: 3.54311326099641e-139| (7) Cortex ZG: 6.26755446207934e-138| (8) Cycling TH+: 5.41265702030299e-128| (9) Cortex X Zone: 6.96307438220953e-123| (10) E Neuroblast: …	(0) E ADR Chromaffin: 7.86203137485963| (1) PN NOR Chromaffin: 9.28779224291701| (2) PN ADR Chromaffin: 8.84420496626185| (4) Macrophage: 9.02033709843955| (5) E NOR Chromaffin: 8.95193955857112| (6) E Glia|SCP: 7.30932186101502| (7) Cortex ZG: 9.87460160962885| (8) Cycling TH+: 7.08026804119395| (9) Cortex X Zone: 9.64690542698654| (10) E Neuroblast: 7.78561849811183| (11) PN Sustentacular: 6.87…	(0) E ADR Chromaffin: 0.052| (1) PN NOR Chromaffin: 0.038| (2) PN ADR Chromaffin: 0.045| (4) Macrophage: 0.16| (5) E NOR Chromaffin: 0.022| (6) E Glia|SCP: 0.044| (7) Cortex ZG: 0.04| (8) Cycling TH+: 0.064| (9) Cortex X Zone: 0.026| (10) E Neuroblast: 0.044| (11) PN Sustentacular: 0.089| (12) Cortex ZF: 0.036| (13) Macrophage: 0.086| (14) Cortex ZG: 0.049| (15) Dendritic cell: 0.04| (16) T cell:…
Cd300lg	(3) Endothelial	8.84309	6.33286e-16	2.42346e-11	0.879	0.0947895	(0) E ADR Chromaffin: 3.44185666657162e-270| (1) PN NOR Chromaffin: 4.2987308665271e-224| (2) PN ADR Chromaffin: 6.6167278224124e-229| (4) Macrophage: 1.0347550733769e-148| (5) E NOR Chromaffin: 2.29746534099877e-155| (6) E Glia|SCP: 5.67447600328519e-138| (7) Cortex ZG: 1.94932068693704e-125| (8) Cycling TH+: 1.44034700094321e-125| (9) Cortex X Zone: 1.11663528168587e-119| (10) E Neuroblast: 1.0…	(0) E ADR Chromaffin: 1.31712970916363e-265| (1) PN NOR Chromaffin: 1.64503832800259e-219| (2) PN ADR Chromaffin: 2.53208940308078e-224| (4) Macrophage: 3.95980071479872e-144| (5) E NOR Chromaffin: 8.7919403669341e-151| (6) E Glia|SCP: 2.17150847693718e-133| (7) Cortex ZG: 7.45966040477068e-121| (8) Cycling TH+: 5.51191990320948e-121| (9) Cortex X Zone: 4.27313989595547e-115| (10) E Neuroblast: 3…	(0) E ADR Chromaffin: 10.3147324318672| (1) PN NOR Chromaffin: 9.68982922168391| (2) PN ADR Chromaffin: 10.0939572025249| (4) Macrophage: 8.78373531737575| (5) E NOR Chromaffin: 9.70358848415193| (6) E Glia|SCP: 9.46994714943429| (7) Cortex ZG: 8.9647772043526| (8) Cycling TH+: 8.98504250606097| (9) Cortex X Zone: 11.2500211470314| (10) E Neuroblast: 10.3537647333182| (11) PN Sustentacular: 8.798…	(0) E ADR Chromaffin: 0.021| (1) PN NOR Chromaffin: 0.07| (2) PN ADR Chromaffin: 0.043| (4) Macrophage: 0.221| (5) E NOR Chromaffin: 0.03| (6) E Glia|SCP: 0.015| (7) Cortex ZG: 0.143| (8) Cycling TH+: 0.048| (9) Cortex X Zone: 0.021| (10) E Neuroblast: 0.024| (11) PN Sustentacular: 0.085| (12) Cortex ZF: 0.091| (13) Macrophage: 0.057| (14) Cortex ZG: 0.078| (15) Dendritic cell: 0.313| (16) T cell…
Tinagl1	(3) Endothelial	6.32128	8.60592e-19	3.29331e-14	0.944	0.268895	(0) E ADR Chromaffin: 2.87737952746443e-268| (1) PN NOR Chromaffin: 1.26460234200169e-246| (2) PN ADR Chromaffin: 9.4564545386042e-244| (4) Macrophage: 1.16633501023912e-172| (5) E NOR Chromaffin: 1.28748684519773e-168| (6) E Glia|SCP: 5.54203025657149e-144| (7) Cortex ZG: 1.61656369581615e-66| (8) Cycling TH+: 4.3829911177925e-138| (9) Cortex X Zone: 2.53389502274454e-108| (10) E Neuroblast: 5.3…	(0) E ADR Chromaffin: 1.10111559757009e-263| (1) PN NOR Chromaffin: 4.83938024237206e-242| (2) PN ADR Chromaffin: 3.61879602283306e-239| (4) Macrophage: 4.46333081718305e-168| (5) E NOR Chromaffin: 4.92695465920268e-164| (6) E Glia|SCP: 2.12082413858478e-139| (7) Cortex ZG: 6.18626595114924e-62| (8) Cycling TH+: 1.67728304095684e-133| (9) Cortex X Zone: 9.69670947303882e-104| (10) E Neuroblast: 2…	(0) E ADR Chromaffin: 7.0539794239568| (1) PN NOR Chromaffin: 8.06047777964377| (2) PN ADR Chromaffin: 7.88990926451406| (4) Macrophage: 8.00442708380057| (5) E NOR Chromaffin: 7.27360457453691| (6) E Glia|SCP: 6.23085713168205| (7) Cortex ZG: 2.24285997685655| (8) Cycling TH+: 7.04941104324313| (9) Cortex X Zone: 4.32606064231329| (10) E Neuroblast: 7.03946981348587| (11) PN Sustentacular: 7.847…	(0) E ADR Chromaffin: 0.108| (1) PN NOR Chromaffin: 0.094| (2) PN ADR Chromaffin: 0.093| (4) Macrophage: 0.235| (5) E NOR Chromaffin: 0.085| (6) E Glia|SCP: 0.141| (7) Cortex ZG: 0.84| (8) Cycling TH+: 0.107| (9) Cortex X Zone: 0.365| (10) E Neuroblast: 0.068| (11) PN Sustentacular: 0.134| (12) Cortex ZF: 0.8| (13) Macrophage: 0.152| (14) Cortex ZG: 0.893| (15) Dendritic cell: 0.101| (16) T cell:…
Icam2	(3) Endothelial	6.81335	3.11265e-17	1.19115e-12	0.911	0.119947	(0) E ADR Chromaffin: 1.31642784371254e-267| (1) PN NOR Chromaffin: 1.50632070134071e-218| (2) PN ADR Chromaffin: 2.51306205489014e-234| (4) Macrophage: 1.54347008746133e-155| (5) E NOR Chromaffin: 7.5286051725053e-164| (6) E Glia|SCP: 1.57347442913946e-143| (7) Cortex ZG: 7.06574495639917e-140| (8) Cycling TH+: 3.41397154972379e-125| (9) Cortex X Zone: 3.43583703393484e-127| (10) E Neuroblast: 1…	(0) E ADR Chromaffin: 5.03770607231916e-263| (1) PN NOR Chromaffin: 5.76438805989065e-214| (2) PN ADR Chromaffin: 9.61698587165357e-230| (4) Macrophage: 5.90655133069703e-151| (5) E NOR Chromaffin: 2.88104662741433e-159| (6) E Glia|SCP: 6.0213719454309e-139| (7) Cortex ZG: 2.70391927991484e-135| (8) Cycling TH+: 1.3064586326483e-120| (9) Cortex X Zone: 1.31482611614618e-122| (10) E Neuroblast: 6.…	(0) E ADR Chromaffin: 7.20729874465144| (1) PN NOR Chromaffin: 6.09978195517227| (2) PN ADR Chromaffin: 7.29680737583246| (4) Macrophage: 5.79151283000883| (5) E NOR Chromaffin: 7.75798716011007| (6) E Glia|SCP: 7.42230476623513| (7) Cortex ZG: 9.44967138932912| (8) Cycling TH+: 5.71176021123056| (9) Cortex X Zone: 9.59128164061409| (10) E Neuroblast: 7.46145065147457| (11) PN Sustentacular: 7.70…	(0) E ADR Chromaffin: 0.061| (1) PN NOR Chromaffin: 0.138| (2) PN ADR Chromaffin: 0.067| (4) Macrophage: 0.239| (5) E NOR Chromaffin: 0.035| (6) E Glia|SCP: 0.041| (7) Cortex ZG: 0.065| (8) Cycling TH+: 0.142| (9) Cortex X Zone: 0.018| (10) E Neuroblast: 0.048| (11) PN Sustentacular: 0.098| (12) Cortex ZF: 0.073| (13) Macrophage: 0.133| (14) Cortex ZG: 0.058| (15) Dendritic cell: 0.202| (16) T ce…
Vamp5	(3) Endothelial	5.17224	2.02164e-15	7.73642e-11	0.916	0.217211	(0) E ADR Chromaffin: 1.38014788729499e-267| (1) PN NOR Chromaffin: 3.46709699761206e-249| (2) PN ADR Chromaffin: 1.48049395387667e-242| (4) Macrophage: 3.41926129786763e-161| (5) E NOR Chromaffin: 1.5372928331614e-162| (6) E Glia|SCP: 1.50361347787486e-120| (7) Cortex ZG: 1.19921955884789e-109| (8) Cycling TH+: 1.12469368270719e-133| (9) Cortex X Zone: 7.97977928785872e-86| (10) E Neuroblast: 3.…	(0) E ADR Chromaffin: 5.28154993510047e-263| (1) PN NOR Chromaffin: 1.32678867904618e-244| (2) PN ADR Chromaffin: 5.66555426269526e-238| (4) Macrophage: 1.30848291346798e-156| (5) E NOR Chromaffin: 5.88291221394204e-158| (6) E Glia|SCP: 5.75402805713152e-116| (7) Cortex ZG: 4.5891734077991e-105| (8) Cycling TH+: 4.30397778498388e-129| (9) Cortex X Zone: 3.05370193787777e-81| (10) E Neuroblast: 1.…	(0) E ADR Chromaffin: 6.69833769950423| (1) PN NOR Chromaffin: 8.18440429102932| (2) PN ADR Chromaffin: 6.97876454522677| (4) Macrophage: 5.92892327688128| (5) E NOR Chromaffin: 6.92450207267966| (6) E Glia|SCP: 4.25433523813538| (7) Cortex ZG: 4.12222827048569| (8) Cycling TH+: 6.90402226100889| (9) Cortex X Zone: 3.43763127292258| (10) E Neuroblast: 7.21659390894166| (11) PN Sustentacular: 3.49…	(0) E ADR Chromaffin: 0.061| (1) PN NOR Chromaffin: 0.033| (2) PN ADR Chromaffin: 0.039| (4) Macrophage: 0.187| (5) E NOR Chromaffin: 0.049| (6) E Glia|SCP: 0.214| (7) Cortex ZG: 0.381| (8) Cycling TH+: 0.051| (9) Cortex X Zone: 0.562| (10) E Neuroblast: 0.048| (11) PN Sustentacular: 0.237| (12) Cortex ZF: 0.645| (13) Macrophage: 0.286| (14) Cortex ZG: 0.32| (15) Dendritic cell: 0.162| (16) T cel…
Tm4sf1	(3) Endothelial	6.20249	1.9402e-19	7.42476e-15	0.966	0.327158	(0) E ADR Chromaffin: 5.91370092076851e-266| (1) PN NOR Chromaffin: 8.81382794497207e-125| (2) PN ADR Chromaffin: 8.30996334522984e-193| (4) Macrophage: 1.98064410074384e-179| (5) E NOR Chromaffin: 1.52375876041824e-159| (6) E Glia|SCP: 2.6025936750749e-65| (7) Cortex ZG: 1.05946639422155e-150| (8) Cycling TH+: 6.6267324387723e-136| (9) Cortex X Zone: 1.33404701914059e-138| (10) E Neuroblast: 1.7…	(0) E ADR Chromaffin: 2.26305506835969e-261| (1) PN NOR Chromaffin: 3.37287567798191e-120| (2) PN ADR Chromaffin: 3.18005677295256e-188| (4) Macrophage: 7.57952884472652e-175| (5) E NOR Chromaffin: 5.83112002436853e-155| (6) E Glia|SCP: 9.95960547577663e-61| (7) Cortex ZG: 4.05436599740702e-146| (8) Cycling TH+: 2.53591796966939e-131| (9) Cortex X Zone: 5.10513113284721e-134| (10) E Neuroblast: 6…	(0) E ADR Chromaffin: 6.54985750916855| (1) PN NOR Chromaffin: 2.20971704123652| (2) PN ADR Chromaffin: 3.93357474447543| (4) Macrophage: 9.02428365483894| (5) E NOR Chromaffin: 5.09810926527487| (6) E Glia|SCP: 1.75376964012922| (7) Cortex ZG: 8.11464687132221| (8) Cycling TH+: 5.48588317366055| (9) Cortex X Zone: 10.3916786159203| (10) E Neuroblast: 5.87847643338358| (11) PN Sustentacular: 1.91…	(0) E ADR Chromaffin: 0.17| (1) PN NOR Chromaffin: 0.716| (2) PN ADR Chromaffin: 0.413| (4) Macrophage: 0.305| (5) E NOR Chromaffin: 0.274| (6) E Glia|SCP: 0.888| (7) Cortex ZG: 0.175| (8) Cycling TH+: 0.275| (9) Cortex X Zone: 0.082| (10) E Neuroblast: 0.235| (11) PN Sustentacular: 0.839| (12) Cortex ZF: 0.1| (13) Macrophage: 0.124| (14) Cortex ZG: 0.097| (15) Dendritic cell: 0.172| (16) T cell:…
Tmem204	(3) Endothelial	7.3273	9.54868e-18	3.65409e-13	0.933	0.173158	(0) E ADR Chromaffin: 7.8661832615858e-266| (1) PN NOR Chromaffin: 2.33477936567614e-244| (2) PN ADR Chromaffin: 1.46098184810398e-245| (4) Macrophage: 4.00549968167896e-166| (5) E NOR Chromaffin: 4.85255378042997e-166| (6) E Glia|SCP: 6.77447270558702e-111| (7) Cortex ZG: 3.36571458652495e-140| (8) Cycling TH+: 1.35010112193913e-135| (9) Cortex X Zone: 1.44864556100978e-130| (10) E Neuroblast: 6…	(0) E ADR Chromaffin: 3.01023101054365e-261| (1) PN NOR Chromaffin: 8.93473367656945e-240| (2) PN ADR Chromaffin: 5.59088533632432e-241| (4) Macrophage: 1.5328246181849e-161| (5) E NOR Chromaffin: 1.85697528069494e-161| (6) E Glia|SCP: 2.59245521497404e-106| (7) Cortex ZG: 1.28799165797137e-135| (8) Cycling TH+: 5.16656697343668e-131| (9) Cortex X Zone: 5.54367683287221e-126| (10) E Neuroblast: 2…	(0) E ADR Chromaffin: 7.54314202601552| (1) PN NOR Chromaffin: 8.73007400859755| (2) PN ADR Chromaffin: 8.66880117355864| (4) Macrophage: 8.42679405496596| (5) E NOR Chromaffin: 7.9400827543607| (6) E Glia|SCP: 3.43690054902661| (7) Cortex ZG: 7.7532674645741| (8) Cycling TH+: 7.35500157119752| (9) Cortex X Zone: 9.12306842434101| (10) E Neuroblast: 7.45570632009723| (11) PN Sustentacular: 4.3213…	(0) E ADR Chromaffin: 0.102| (1) PN NOR Chromaffin: 0.083| (2) PN ADR Chromaffin: 0.065| (4) Macrophage: 0.269| (5) E NOR Chromaffin: 0.083| (6) E Glia|SCP: 0.425| (7) Cortex ZG: 0.15| (8) Cycling TH+: 0.107| (9) Cortex X Zone: 0.05| (10) E Neuroblast: 0.076| (11) PN Sustentacular: 0.223| (12) Cortex ZF: 0.145| (13) Macrophage: 0.067| (14) Cortex ZG: 0.165| (15) Dendritic cell: 0.091| (16) T cell…
Ephb4	(3) Endothelial	5.95476	1.04044e-17	3.98155e-13	0.909	0.186316	(0) E ADR Chromaffin: 1.64137806345225e-264| (1) PN NOR Chromaffin: 1.16773770924873e-242| (2) PN ADR Chromaffin: 8.82570406262404e-240| (4) Macrophage: 2.1825919776463e-169| (5) E NOR Chromaffin: 1.21107122260553e-154| (6) E Glia|SCP: 1.08044243000644e-82| (7) Cortex ZG: 3.34367626525185e-108| (8) Cycling TH+: 6.5482816288074e-128| (9) Cortex X Zone: 1.31667571287968e-86| (10) E Neuroblast: 6.71…	(0) E ADR Chromaffin: 6.28122557321908e-260| (1) PN NOR Chromaffin: 4.46869866575304e-238| (2) PN ADR Chromaffin: 3.37742043068497e-235| (4) Macrophage: 8.35234298005686e-165| (5) E NOR Chromaffin: 4.63452735466686e-150| (6) E Glia|SCP: 4.13463709114866e-78| (7) Cortex ZG: 1.27955803318658e-103| (8) Cycling TH+: 2.50589641371202e-123| (9) Cortex X Zone: 5.03865461804797e-82| (10) E Neuroblast: 2.…	(0) E ADR Chromaffin: 6.87425915835171| (1) PN NOR Chromaffin: 8.13611302125493| (2) PN ADR Chromaffin: 8.57090316901791| (4) Macrophage: 8.53277482853934| (5) E NOR Chromaffin: 6.19808544396119| (6) E Glia|SCP: 2.79099581160121| (7) Cortex ZG: 3.9962490078453| (8) Cycling TH+: 6.26408477573857| (9) Cortex X Zone: 3.61069227619878| (10) E Neuroblast: 6.97089860715688| (11) PN Sustentacular: 2.855…	(0) E ADR Chromaffin: 0.061| (1) PN NOR Chromaffin: 0.046| (2) PN ADR Chromaffin: 0.048| (4) Macrophage: 0.127| (5) E NOR Chromaffin: 0.085| (6) E Glia|SCP: 0.49| (7) Cortex ZG: 0.298| (8) Cycling TH+: 0.088| (9) Cortex X Zone: 0.462| (10) E Neuroblast: 0.064| (11) PN Sustentacular: 0.362| (12) Cortex ZF: 0.282| (13) Macrophage: 0.048| (14) Cortex ZG: 0.427| (15) Dendritic cell: 0.04| (16) T cell…
Tmem88	(3) Endothelial	6.55286	9.7386e-16	3.72677e-11	0.912	0.129947	(0) E ADR Chromaffin: 1.88769491081838e-262| (1) PN NOR Chromaffin: 1.27316938475436e-232| (2) PN ADR Chromaffin: 7.26585196365726e-236| (4) Macrophage: 7.97452954304001e-151| (5) E NOR Chromaffin: 1.08423789094492e-155| (6) E Glia|SCP: 1.74984939880899e-140| (7) Cortex ZG: 2.73917831641312e-139| (8) Cycling TH+: 5.47561746427175e-130| (9) Cortex X Zone: 1.15074109072021e-125| (10) E Neuroblast: …	(0) E ADR Chromaffin: 7.22383088471978e-258| (1) PN NOR Chromaffin: 4.87216460157798e-228| (2) PN ADR Chromaffin: 2.78049622945236e-231| (4) Macrophage: 3.05169296553055e-146| (5) E NOR Chromaffin: 4.14916156106802e-151| (6) E Glia|SCP: 6.69632367936223e-136| (7) Cortex ZG: 1.04822875812497e-134| (8) Cycling TH+: 2.09540929122751e-125| (9) Cortex X Zone: 4.40365600596812e-121| (10) E Neuroblast: …	(0) E ADR Chromaffin: 7.11300877698021| (1) PN NOR Chromaffin: 7.36370649008277| (2) PN ADR Chromaffin: 7.79138574140768| (4) Macrophage: 5.58607711034778| (5) E NOR Chromaffin: 6.34138729965112| (6) E Glia|SCP: 6.44445488508391| (7) Cortex ZG: 8.34138194832337| (8) Cycling TH+: 6.97815180092697| (9) Cortex X Zone: 8.15160165530335| (10) E Neuroblast: 7.1093737945852| (11) PN Sustentacular: 6.413…	(0) E ADR Chromaffin: 0.078| (1) PN NOR Chromaffin: 0.09| (2) PN ADR Chromaffin: 0.067| (4) Macrophage: 0.289| (5) E NOR Chromaffin: 0.102| (6) E Glia|SCP: 0.068| (7) Cortex ZG: 0.075| (8) Cycling TH+: 0.102| (9) Cortex X Zone: 0.044| (10) E Neuroblast: 0.056| (11) PN Sustentacular: 0.116| (12) Cortex ZF: 0.091| (13) Macrophage: 0.219| (14) Cortex ZG: 0.117| (15) Dendritic cell: 0.263| (16) T cel…
RP23-162H6.1	(3) Endothelial	8.21808	8.04612e-17	3.07909e-12	0.902	0.0815789	(0) E ADR Chromaffin: 1.05885948985829e-261| (1) PN NOR Chromaffin: 4.84580796937144e-250| (2) PN ADR Chromaffin: 2.75289568104689e-245| (4) Macrophage: 3.2509746607496e-164| (5) E NOR Chromaffin: 6.31625817257922e-156| (6) E Glia|SCP: 2.35634856494682e-135| (7) Cortex ZG: 5.64666702927194e-135| (8) Cycling TH+: 3.92674536011087e-131| (9) Cortex X Zone: 6.38086671792788e-123| (10) E Neuroblast: 4…	(0) E ADR Chromaffin: 4.05204349578969e-257| (1) PN NOR Chromaffin: 1.85439379371906e-245| (2) PN ADR Chromaffin: 1.05347811922302e-240| (4) Macrophage: 1.24408298317566e-159| (5) E NOR Chromaffin: 2.41710567748262e-151| (6) E Glia|SCP: 9.01727468833849e-131| (7) Cortex ZG: 2.16086653876179e-130| (8) Cycling TH+: 1.50268691440723e-126| (9) Cortex X Zone: 2.44183007561664e-118| (10) E Neuroblast: …	(0) E ADR Chromaffin: 7.4009726601792| (1) PN NOR Chromaffin: 11.8595483677034| (2) PN ADR Chromaffin: 10.4717616891045| (4) Macrophage: 10.1107938090185| (5) E NOR Chromaffin: 7.0526651094173| (6) E Glia|SCP: 6.35635522800125| (7) Cortex ZG: 8.74472183207964| (8) Cycling TH+: 7.79110101953206| (9) Cortex X Zone: 6.94914859418323| (10) E Neuroblast: 6.4827925076679| (11) PN Sustentacular: 9.12385…	(0) E ADR Chromaffin: 0.066| (1) PN NOR Chromaffin: 0.016| (2) PN ADR Chromaffin: 0.021| (4) Macrophage: 0.158| (5) E NOR Chromaffin: 0.077| (6) E Glia|SCP: 0.092| (7) Cortex ZG: 0.1| (8) Cycling TH+: 0.051| (9) Cortex X Zone: 0.026| (10) E Neuroblast: 0.088| (11) PN Sustentacular: 0.054| (12) Cortex ZF: 0.064| (13) Macrophage: 0.01| (14) Cortex ZG: 0.078| (15) Dendritic cell: 0.071| (16) T cell:…
Sgk1	(3) Endothelial	5.1922	1.88907e-18	7.22908e-14	0.966	0.452053	(0) E ADR Chromaffin: 2.39761386239306e-260| (1) PN NOR Chromaffin: 4.15123781098373e-246| (2) PN ADR Chromaffin: 2.52765499444007e-240| (4) Macrophage: 7.33294014509643e-120| (5) E NOR Chromaffin: 1.18606409078772e-168| (6) E Glia|SCP: 3.31395601672672e-149| (7) Cortex ZG: 9.0724117962726e-117| (8) Cycling TH+: 3.63994691980095e-136| (9) Cortex X Zone: 2.86905360784996e-94| (10) E Neuroblast: 4.…	(0) E ADR Chromaffin: 9.17518872860575e-256| (1) PN NOR Chromaffin: 1.58859568550725e-241| (2) PN ADR Chromaffin: 9.67283013272325e-236| (4) Macrophage: 2.8061695347255e-115| (5) E NOR Chromaffin: 4.53883006262644e-164| (6) E Glia|SCP: 1.26818468848098e-144| (7) Cortex ZG: 3.4718305461976e-112| (8) Cycling TH+: 1.39293488726943e-131| (9) Cortex X Zone: 1.09792943465202e-89| (10) E Neuroblast: 1.6…	(0) E ADR Chromaffin: 7.20912262918781| (1) PN NOR Chromaffin: 7.85209302847852| (2) PN ADR Chromaffin: 7.20697973062073| (4) Macrophage: 3.06100143065956| (5) E NOR Chromaffin: 6.98803922207765| (6) E Glia|SCP: 6.53528851965805| (7) Cortex ZG: 4.03556381327787| (8) Cycling TH+: 6.09439359669088| (9) Cortex X Zone: 3.41832897458854| (10) E Neuroblast: 6.55889825347939| (11) PN Sustentacular: 5.03…	(0) E ADR Chromaffin: 0.199| (1) PN NOR Chromaffin: 0.152| (2) PN ADR Chromaffin: 0.162| (4) Macrophage: 0.68| (5) E NOR Chromaffin: 0.195| (6) E Glia|SCP: 0.204| (7) Cortex ZG: 0.697| (8) Cycling TH+: 0.283| (9) Cortex X Zone: 0.856| (10) E Neuroblast: 0.211| (11) PN Sustentacular: 0.362| (12) Cortex ZF: 0.855| (13) Macrophage: 0.705| (14) Cortex ZG: 0.786| (15) Dendritic cell: 0.535| (16) T cel…
Ifi44	(3) Endothelial	7.72615	4.87034e-11	1.86378e-06	0.845	0.104789	(0) E ADR Chromaffin: 4.13852661744763e-256| (1) PN NOR Chromaffin: 2.50445381794995e-219| (2) PN ADR Chromaffin: 2.89670998132781e-220| (4) Macrophage: 1.97049100203153e-114| (5) E NOR Chromaffin: 1.98207847635753e-147| (6) E Glia|SCP: 2.75241521244224e-128| (7) Cortex ZG: 9.76690667604367e-118| (8) Cycling TH+: 1.78898549842387e-118| (9) Cortex X Zone: 9.74067149067812e-102| (10) E Neuroblast: …	(0) E ADR Chromaffin: 1.58373136596486e-251| (1) PN NOR Chromaffin: 9.58404387053088e-215| (2) PN ADR Chromaffin: 1.10851297565453e-215| (4) Macrophage: 7.54067496657426e-110| (5) E NOR Chromaffin: 7.585017913325e-143| (6) E Glia|SCP: 1.0532942534974e-123| (7) Cortex ZG: 3.73759984678839e-113| (8) Cycling TH+: 6.84608970536847e-114| (9) Cortex X Zone: 3.7275601660527e-97| (10) E Neuroblast: 3.633…	(0) E ADR Chromaffin: 9.41029177202139| (1) PN NOR Chromaffin: 9.8792149498053| (2) PN ADR Chromaffin: 9.71253213933051| (4) Macrophage: 4.51811976221736| (5) E NOR Chromaffin: 9.25089648635457| (6) E Glia|SCP: 8.78863996002293| (7) Cortex ZG: 8.12089344720711| (8) Cycling TH+: 8.63742863192608| (9) Cortex X Zone: 6.36923426773214| (10) E Neuroblast: 10.7810472834596| (11) PN Sustentacular: 9.431…	(0) E ADR Chromaffin: 0.018| (1) PN NOR Chromaffin: 0.039| (2) PN ADR Chromaffin: 0.027| (4) Macrophage: 0.296| (5) E NOR Chromaffin: 0.016| (6) E Glia|SCP: 0.024| (7) Cortex ZG: 0.11| (8) Cycling TH+: 0.032| (9) Cortex X Zone: 0.109| (10) E Neuroblast: 0.004| (11) PN Sustentacular: 0.08| (12) Cortex ZF: 0.082| (13) Macrophage: 0.095| (14) Cortex ZG: 0.049| (15) Dendritic cell: 0.152| (16) T cell…
Ushbp1	(3) Endothelial	7.49898	9.63191e-17	3.68594e-12	0.886	0.0907895	(0) E ADR Chromaffin: 2.73615626116527e-254| (1) PN NOR Chromaffin: 2.45857715289373e-217| (2) PN ADR Chromaffin: 4.13425012829614e-214| (4) Macrophage: 2.80539737624473e-159| (5) E NOR Chromaffin: 1.03316720318025e-154| (6) E Glia|SCP: 1.3137891880235e-135| (7) Cortex ZG: 1.80588246774225e-129| (8) Cycling TH+: 2.95445425836015e-124| (9) Cortex X Zone: 2.16599508503858e-116| (10) E Neuroblast: 5…	(0) E ADR Chromaffin: 1.04707227802273e-249| (1) PN NOR Chromaffin: 9.40848304869373e-213| (2) PN ADR Chromaffin: 1.58209483909637e-209| (4) Macrophage: 1.07356946794133e-154| (5) E NOR Chromaffin: 3.95372425313017e-150| (6) E Glia|SCP: 5.02760846472831e-131| (7) Cortex ZG: 6.91075102755605e-125| (8) Cycling TH+: 1.13061055558926e-119| (9) Cortex X Zone: 8.28882999142565e-112| (10) E Neuroblast: …	(0) E ADR Chromaffin: 7.53005031830355| (1) PN NOR Chromaffin: 7.78347514165409| (2) PN ADR Chromaffin: 5.57764366640334| (4) Macrophage: 8.96661005396455| (5) E NOR Chromaffin: 8.36080943433955| (6) E Glia|SCP: 7.36274225217017| (7) Cortex ZG: 8.54927618203497| (8) Cycling TH+: 7.68498248944564| (9) Cortex X Zone: 7.85634714369918| (10) E Neuroblast: 7.44046449253068| (11) PN Sustentacular: 6.93…	(0) E ADR Chromaffin: 0.06| (1) PN NOR Chromaffin: 0.096| (2) PN ADR Chromaffin: 0.092| (4) Macrophage: 0.135| (5) E NOR Chromaffin: 0.041| (6) E Glia|SCP: 0.036| (7) Cortex ZG: 0.098| (8) Cycling TH+: 0.067| (9) Cortex X Zone: 0.068| (10) E Neuroblast: 0.044| (11) PN Sustentacular: 0.112| (12) Cortex ZF: 0.127| (13) Macrophage: 0.105| (14) Cortex ZG: 0.097| (15) Dendritic cell: 0.101| (16) T cel…
Plpp1	(3) Endothelial	5.99614	9.02376e-21	3.45321e-16	1	0.616105	(0) E ADR Chromaffin: 1.90066558920768e-253| (1) PN NOR Chromaffin: 3.58572575722237e-233| (2) PN ADR Chromaffin: 2.24013595544759e-237| (4) Macrophage: 1.60788569040731e-192| (5) E NOR Chromaffin: 1.33978422568556e-177| (6) E Glia|SCP: 4.20400383987529e-159| (7) Cortex ZG: 2.42590221574888e-152| (8) Cycling TH+: 1.65791175480303e-151| (9) Cortex X Zone: 1.59228618212462e-141| (10) E Neuroblast: …	(0) E ADR Chromaffin: 7.27346707677995e-249| (1) PN NOR Chromaffin: 1.37218553277386e-228| (2) PN ADR Chromaffin: 8.57255227430684e-233| (4) Macrophage: 6.1530569600507e-188| (5) E NOR Chromaffin: 5.12708627485349e-173| (6) E Glia|SCP: 1.60878818944348e-154| (7) Cortex ZG: 9.28344259922782e-148| (8) Cycling TH+: 6.34449670328025e-147| (9) Cortex X Zone: 6.09336076175448e-137| (10) E Neuroblast: 3…	(0) E ADR Chromaffin: 6.65367216219545| (1) PN NOR Chromaffin: 5.92991447445946| (2) PN ADR Chromaffin: 7.00042907364762| (4) Macrophage: 8.84466015328096| (5) E NOR Chromaffin: 6.15473209022007| (6) E Glia|SCP: 4.85853983262937| (7) Cortex ZG: 3.18862190840448| (8) Cycling TH+: 6.37388918477783| (9) Cortex X Zone: 4.87784456658329| (10) E Neuroblast: 6.33660337495813| (11) PN Sustentacular: 5.86…	(0) E ADR Chromaffin: 0.554| (1) PN NOR Chromaffin: 0.683| (2) PN ADR Chromaffin: 0.483| (4) Macrophage: 0.469| (5) E NOR Chromaffin: 0.608| (6) E Glia|SCP: 0.74| (7) Cortex ZG: 0.985| (8) Cycling TH+: 0.604| (9) Cortex X Zone: 0.903| (10) E Neuroblast: 0.57| (11) PN Sustentacular: 0.455| (12) Cortex ZF: 0.818| (13) Macrophage: 0.219| (14) Cortex ZG: 1| (15) Dendritic cell: 0.253| (16) T cell: 0.…
Rasip1	(3) Endothelial	6.50805	9.94174e-17	3.80451e-12	0.899	0.0826316	(0) E ADR Chromaffin: 1.09174163416858e-250| (1) PN NOR Chromaffin: 1.3519908443217e-214| (2) PN ADR Chromaffin: 1.00522396028595e-196| (4) Macrophage: 6.58359549648259e-172| (5) E NOR Chromaffin: 3.59315081956642e-151| (6) E Glia|SCP: 6.33389945597138e-137| (7) Cortex ZG: 1.81208059357827e-136| (8) Cycling TH+: 3.3208531906429e-125| (9) Cortex X Zone: 1.843331587803e-121| (10) E Neuroblast: 6.02…	(0) E ADR Chromaffin: 4.17787688563632e-246| (1) PN NOR Chromaffin: 5.17379856305029e-210| (2) PN ADR Chromaffin: 3.84679105122228e-192| (4) Macrophage: 2.51941032459396e-167| (5) E NOR Chromaffin: 1.37502695563168e-146| (6) E Glia|SCP: 2.42385664381113e-132| (7) Cortex ZG: 6.93447001550533e-132| (8) Cycling TH+: 1.27082409899522e-120| (9) Cortex X Zone: 7.05406132020451e-117| (10) E Neuroblast: …	(0) E ADR Chromaffin: 6.50082911636364| (1) PN NOR Chromaffin: 6.33385504560411| (2) PN ADR Chromaffin: 5.13852691896424| (4) Macrophage: 7.77914249879995| (5) E NOR Chromaffin: 6.08044811112363| (6) E Glia|SCP: 6.36378221230454| (7) Cortex ZG: 7.78235396543163| (8) Cycling TH+: 6.2907938020332| (9) Cortex X Zone: 7.56928579936703| (10) E Neuroblast: 5.92561222619541| (11) PN Sustentacular: 7.109…	(0) E ADR Chromaffin: 0.085| (1) PN NOR Chromaffin: 0.125| (2) PN ADR Chromaffin: 0.169| (4) Macrophage: 0.063| (5) E NOR Chromaffin: 0.089| (6) E Glia|SCP: 0.056| (7) Cortex ZG: 0.053| (8) Cycling TH+: 0.091| (9) Cortex X Zone: 0.05| (10) E Neuroblast: 0.096| (11) PN Sustentacular: 0.049| (12) Cortex ZF: 0.073| (13) Macrophage: 0.067| (14) Cortex ZG: 0.117| (15) Dendritic cell: 0.071| (16) T cel…
Egfl7	(3) Endothelial	7.51215	6.99681e-21	2.67754e-16	0.997	0.218737	(0) E ADR Chromaffin: 2.03952408291269e-248| (1) PN NOR Chromaffin: 1.25415053979433e-243| (2) PN ADR Chromaffin: 1.15638623502924e-242| (4) Macrophage: 2.18201606900964e-196| (5) E NOR Chromaffin: 6.62701480318641e-176| (6) E Glia|SCP: 1.68555464470128e-164| (7) Cortex ZG: 2.24594435759419e-162| (8) Cycling TH+: 2.29849943004286e-149| (9) Cortex X Zone: 1.19559046569645e-146| (10) E Neuroblast: …	(0) E ADR Chromaffin: 7.80485076049028e-244| (1) PN NOR Chromaffin: 4.79938328568494e-239| (2) PN ADR Chromaffin: 4.42525884420991e-238| (4) Macrophage: 8.3501390928861e-192| (5) E NOR Chromaffin: 2.53602602488337e-171| (6) E Glia|SCP: 6.45028051434285e-160| (7) Cortex ZG: 8.59477986764144e-158| (8) Cycling TH+: 8.79589761888801e-145| (9) Cortex X Zone: 4.57528559412717e-142| (10) E Neuroblast: 7…	(0) E ADR Chromaffin: 5.50816252435668| (1) PN NOR Chromaffin: 6.5664977113687| (2) PN ADR Chromaffin: 6.48539599780177| (4) Macrophage: 9.67075273810032| (5) E NOR Chromaffin: 5.65893650420791| (6) E Glia|SCP: 6.66671335385221| (7) Cortex ZG: 8.8032717078764| (8) Cycling TH+: 5.86130800621278| (9) Cortex X Zone: 8.36435799030449| (10) E Neuroblast: 6.13677906358467| (11) PN Sustentacular: 8.8396…	(0) E ADR Chromaffin: 0.509| (1) PN NOR Chromaffin: 0.334| (2) PN ADR Chromaffin: 0.319| (4) Macrophage: 0.268| (5) E NOR Chromaffin: 0.4| (6) E Glia|SCP: 0.143| (7) Cortex ZG: 0.158| (8) Cycling TH+: 0.406| (9) Cortex X Zone: 0.103| (10) E Neuroblast: 0.307| (11) PN Sustentacular: 0.098| (12) Cortex ZF: 0.091| (13) Macrophage: 0.095| (14) Cortex ZG: 0.087| (15) Dendritic cell: 0.162| (16) T cell…
Serinc3	(3) Endothelial	2.61875	1.16362e-14	4.45294e-10	1	0.980474	(0) E ADR Chromaffin: 4.61852044752822e-248| (1) PN NOR Chromaffin: 2.51303503426998e-231| (2) PN ADR Chromaffin: 2.38290017276582e-229| (4) Macrophage: 5.58720434574722e-25| (5) E NOR Chromaffin: 4.45666272900871e-177| (6) E Glia|SCP: 1.23259002852476e-158| (7) Cortex ZG: 2.07613650098425e-43| (8) Cycling TH+: 6.05922251685277e-149| (9) Cortex X Zone: 8.35449459974699e-140| (10) E Neuroblast: 6.…	(0) E ADR Chromaffin: 1.7674154048601e-243| (1) PN NOR Chromaffin: 9.61688246914435e-227| (2) PN ADR Chromaffin: 9.11888238114025e-225| (4) Macrophage: 2.13811135903054e-20| (5) E NOR Chromaffin: 1.70547569313705e-172| (6) E Glia|SCP: 4.71687552115854e-154| (7) Cortex ZG: 7.94495916196654e-39| (8) Cycling TH+: 2.31874327274922e-144| (9) Cortex X Zone: 3.19709799343118e-135| (10) E Neuroblast: 2.6…	(0) E ADR Chromaffin: 4.73332937312091| (1) PN NOR Chromaffin: 4.2123530171598| (2) PN ADR Chromaffin: 4.17246734221059| (4) Macrophage: 0.502375031803857| (5) E NOR Chromaffin: 4.73943472808739| (6) E Glia|SCP: 3.84372172912383| (7) Cortex ZG: 0.82494843600807| (8) Cycling TH+: 4.580253563863| (9) Cortex X Zone: 3.45576822041604| (10) E Neuroblast: 5.19251777733737| (11) PN Sustentacular: 3.0959…	(0) E ADR Chromaffin: 0.963| (1) PN NOR Chromaffin: 0.987| (2) PN ADR Chromaffin: 0.978| (4) Macrophage: 1| (5) E NOR Chromaffin: 0.963| (6) E Glia|SCP: 0.981| (7) Cortex ZG: 0.997| (8) Cycling TH+: 0.944| (9) Cortex X Zone: 1| (10) E Neuroblast: 0.88| (11) PN Sustentacular: 0.991| (12) Cortex ZF: 1| (13) Macrophage: 1| (14) Cortex ZG: 1| (15) Dendritic cell: 0.99| (16) T cell: 0.955| (17) NK cel…
Ramp3	(3) Endothelial	6.45848	2.01354e-17	7.70543e-13	0.912	0.129368	(0) E ADR Chromaffin: 8.24398488940178e-244| (1) PN NOR Chromaffin: 2.09531301699018e-244| (2) PN ADR Chromaffin: 5.01508903972891e-237| (4) Macrophage: 2.32929278147771e-171| (5) E NOR Chromaffin: 1.87712173564259e-139| (6) E Glia|SCP: 3.30088251938665e-133| (7) Cortex ZG: 5.66949117271968e-141| (8) Cycling TH+: 3.05754755630321e-120| (9) Cortex X Zone: 6.77709533447154e-127| (10) E Neuroblast: …	(0) E ADR Chromaffin: 3.15480813747627e-239| (1) PN NOR Chromaffin: 8.01834385341802e-240| (2) PN ADR Chromaffin: 1.91917427372346e-232| (4) Macrophage: 8.91373761615891e-167| (5) E NOR Chromaffin: 7.18336945795705e-135| (6) E Glia|SCP: 1.26318172251888e-128| (7) Cortex ZG: 2.16960088197637e-136| (8) Cycling TH+: 1.17006229884611e-115| (9) Cortex X Zone: 2.59345884259557e-122| (10) E Neuroblast: …	(0) E ADR Chromaffin: 5.86103053780523| (1) PN NOR Chromaffin: 7.82248334784954| (2) PN ADR Chromaffin: 7.46025015607101| (4) Macrophage: 8.96275965903482| (5) E NOR Chromaffin: 4.53525300795588| (6) E Glia|SCP: 5.12140326630654| (7) Cortex ZG: 8.96077814123099| (8) Cycling TH+: 5.16046939905665| (9) Cortex X Zone: 8.85987971130522| (10) E Neuroblast: 4.67156984998889| (11) PN Sustentacular: 3.81…	(0) E ADR Chromaffin: 0.135| (1) PN NOR Chromaffin: 0.047| (2) PN ADR Chromaffin: 0.064| (4) Macrophage: 0.122| (5) E NOR Chromaffin: 0.224| (6) E Glia|SCP: 0.121| (7) Cortex ZG: 0.055| (8) Cycling TH+: 0.233| (9) Cortex X Zone: 0.029| (10) E Neuroblast: 0.219| (11) PN Sustentacular: 0.232| (12) Cortex ZF: 0.036| (13) Macrophage: 0.019| (14) Cortex ZG: 0.243| (15) Dendritic cell: 0.162| (16) T ce…
Cyyr1	(3) Endothelial	6.83493	4.91057e-16	1.87918e-11	0.848	0.0907368	(0) E ADR Chromaffin: 1.57318215693798e-243| (1) PN NOR Chromaffin: 3.29769892752319e-75| (2) PN ADR Chromaffin: 2.3944518624012e-186| (4) Macrophage: 6.08370483548403e-157| (5) E NOR Chromaffin: 2.19662800802996e-104| (6) E Glia|SCP: 1.15342969725344e-128| (7) Cortex ZG: 4.33494892589292e-125| (8) Cycling TH+: 2.29938978837424e-105| (9) Cortex X Zone: 4.97456960586211e-113| (10) E Neuroblast: 1.…	(0) E ADR Chromaffin: 6.02025347817025e-239| (1) PN NOR Chromaffin: 1.26196342558457e-70| (2) PN ADR Chromaffin: 9.1630883870369e-182| (4) Macrophage: 2.32811216644303e-152| (5) E NOR Chromaffin: 8.40605606112905e-100| (6) E Glia|SCP: 4.41394476544945e-124| (7) Cortex ZG: 1.6588982549607e-120| (8) Cycling TH+: 8.79930484215055e-101| (9) Cortex X Zone: 1.90366829677131e-108| (10) E Neuroblast: 5.2…	(0) E ADR Chromaffin: 7.35477720637848| (1) PN NOR Chromaffin: 2.51978077215189| (2) PN ADR Chromaffin: 5.22970966905438| (4) Macrophage: 8.43506184851553| (5) E NOR Chromaffin: 4.12926139924295| (6) E Glia|SCP: 8.02095478186651| (7) Cortex ZG: 8.35646491723509| (8) Cycling TH+: 5.43592276772913| (9) Cortex X Zone: 8.9462031802761| (10) E Neuroblast: 5.84122704088618| (11) PN Sustentacular: 7.845…	(0) E ADR Chromaffin: 0.045| (1) PN NOR Chromaffin: 0.588| (2) PN ADR Chromaffin: 0.11| (4) Macrophage: 0.057| (5) E NOR Chromaffin: 0.264| (6) E Glia|SCP: 0.027| (7) Cortex ZG: 0.038| (8) Cycling TH+: 0.134| (9) Cortex X Zone: 0.015| (10) E Neuroblast: 0.084| (11) PN Sustentacular: 0.045| (12) Cortex ZF: 0.073| (13) Macrophage: 0.029| (14) Cortex ZG: 0.029| (15) Dendritic cell: 0.04| (16) T cell…
Jup	(3) Endothelial	4.76423	1.7904e-17	6.85149e-13	0.985	0.415895	(0) E ADR Chromaffin: 6.1157530145248e-241| (1) PN NOR Chromaffin: 3.61014058838518e-214| (2) PN ADR Chromaffin: 1.34843375633571e-218| (4) Macrophage: 5.58672552848357e-172| (5) E NOR Chromaffin: 7.570781205212e-156| (6) E Glia|SCP: 1.82801510427274e-138| (7) Cortex ZG: 8.75994740207152e-150| (8) Cycling TH+: 5.58207267595551e-131| (9) Cortex X Zone: 1.40535046833961e-137| (10) E Neuroblast: 2.1…	(0) E ADR Chromaffin: 2.34037636359835e-236| (1) PN NOR Chromaffin: 1.38152860036324e-209| (2) PN ADR Chromaffin: 5.16018629874551e-214| (4) Macrophage: 2.13792812524009e-167| (5) E NOR Chromaffin: 2.89718655161053e-151| (6) E Glia|SCP: 6.99544820103094e-134| (7) Cortex ZG: 3.35225667182473e-145| (8) Cycling TH+: 2.13614757163465e-126| (9) Cortex X Zone: 5.37799517224202e-133| (10) E Neuroblast: …	(0) E ADR Chromaffin: 5.13147440555701| (1) PN NOR Chromaffin: 4.83814397831989| (2) PN ADR Chromaffin: 4.94601197691653| (4) Macrophage: 4.82123929878475| (5) E NOR Chromaffin: 4.30313621644106| (6) E Glia|SCP: 4.04676080454132| (7) Cortex ZG: 5.60445019322401| (8) Cycling TH+: 4.21707072516084| (9) Cortex X Zone: 6.23543798110388| (10) E Neuroblast: 3.31677280203864| (11) PN Sustentacular: 4.21…	(0) E ADR Chromaffin: 0.368| (1) PN NOR Chromaffin: 0.471| (2) PN ADR Chromaffin: 0.381| (4) Macrophage: 0.472| (5) E NOR Chromaffin: 0.47| (6) E Glia|SCP: 0.447| (7) Cortex ZG: 0.268| (8) Cycling TH+: 0.524| (9) Cortex X Zone: 0.212| (10) E Neuroblast: 0.685| (11) PN Sustentacular: 0.451| (12) Cortex ZF: 0.355| (13) Macrophage: 0.676| (14) Cortex ZG: 0.184| (15) Dendritic cell: 0.455| (16) T cel…
Heg1	(3) Endothelial	4.45842	1.39236e-09	5.3283e-05	0.897	0.300579	(0) E ADR Chromaffin: 3.30434977287438e-240| (1) PN NOR Chromaffin: 8.99535992685986e-119| (2) PN ADR Chromaffin: 2.728248589447e-185| (4) Macrophage: 9.33798815746347e-164| (5) E NOR Chromaffin: 1.02851596144501e-139| (6) E Glia|SCP: 3.48172968615052e-82| (7) Cortex ZG: 2.56214458857931e-111| (8) Cycling TH+: 1.24122942208838e-112| (9) Cortex X Zone: 1.86226909720582e-79| (10) E Neuroblast: 4.94…	(0) E ADR Chromaffin: 1.26450857108357e-235| (1) PN NOR Chromaffin: 3.44234433681073e-114| (2) PN ADR Chromaffin: 1.04404617020958e-180| (4) Macrophage: 3.57346130809812e-159| (5) E NOR Chromaffin: 3.93592488125778e-135| (6) E Glia|SCP: 1.33238831629608e-77| (7) Cortex ZG: 9.80481491157531e-107| (8) Cycling TH+: 4.7499367524478e-108| (9) Cortex X Zone: 7.12653138118723e-75| (10) E Neuroblast: 1.8…	(0) E ADR Chromaffin: 6.42436888125753| (1) PN NOR Chromaffin: 3.03363585367435| (2) PN ADR Chromaffin: 4.98018094866735| (4) Macrophage: 8.04256734627148| (5) E NOR Chromaffin: 5.40371374753734| (6) E Glia|SCP: 3.33564435522721| (7) Cortex ZG: 4.78021508744116| (8) Cycling TH+: 5.1864152862271| (9) Cortex X Zone: 3.88605035774576| (10) E Neuroblast: 7.5843295931328| (11) PN Sustentacular: 3.6557…	(0) E ADR Chromaffin: 0.103| (1) PN NOR Chromaffin: 0.437| (2) PN ADR Chromaffin: 0.194| (4) Macrophage: 0.127| (5) E NOR Chromaffin: 0.14| (6) E Glia|SCP: 0.449| (7) Cortex ZG: 0.228| (8) Cycling TH+: 0.168| (9) Cortex X Zone: 0.456| (10) E Neuroblast: 0.044| (11) PN Sustentacular: 0.344| (12) Cortex ZF: 0.309| (13) Macrophage: 0.038| (14) Cortex ZG: 0.437| (15) Dendritic cell: 0.475| (16) T cel…
Irx3	(3) Endothelial	6.90583	5.51419e-14	2.11017e-09	0.805	0.0386842	(0) E ADR Chromaffin: 1.60455095798387e-239| (1) PN NOR Chromaffin: 1.58334575376698e-210| (2) PN ADR Chromaffin: 1.44047327132735e-202| (4) Macrophage: 5.40915890506739e-141| (5) E NOR Chromaffin: 6.59114760966297e-136| (6) E Glia|SCP: 1.07697166422556e-118| (7) Cortex ZG: 3.409182272237e-115| (8) Cycling TH+: 2.65945346641832e-111| (9) Cortex X Zone: 9.84435369065866e-102| (10) E Neuroblast: 6.…	(0) E ADR Chromaffin: 6.14029560601268e-235| (1) PN NOR Chromaffin: 6.05914753051546e-206| (2) PN ADR Chromaffin: 5.51240311471549e-198| (4) Macrophage: 2.06997692979119e-136| (5) E NOR Chromaffin: 2.52230036726583e-131| (6) E Glia|SCP: 4.12135516465839e-114| (7) Cortex ZG: 1.30462587193965e-110| (8) Cycling TH+: 1.01771965252896e-106| (9) Cortex X Zone: 3.76723727034125e-97| (10) E Neuroblast: 2…	(0) E ADR Chromaffin: 8.08161690565829| (1) PN NOR Chromaffin: 8.3625735377843| (2) PN ADR Chromaffin: 7.38257879549598| (4) Macrophage: 7.62727179791195| (5) E NOR Chromaffin: 7.67151151015702| (6) E Glia|SCP: 6.96833385153482| (7) Cortex ZG: 8.30100072106245| (8) Cycling TH+: 7.75899380033096| (9) Cortex X Zone: 7.07106458062939| (10) E Neuroblast: 6.91753168496922| (11) PN Sustentacular: 6.893…	(0) E ADR Chromaffin: 0.016| (1) PN NOR Chromaffin: 0.017| (2) PN ADR Chromaffin: 0.028| (4) Macrophage: 0.072| (5) E NOR Chromaffin: 0.018| (6) E Glia|SCP: 0.015| (7) Cortex ZG: 0.038| (8) Cycling TH+: 0.013| (9) Cortex X Zone: 0.026| (10) E Neuroblast: 0.02| (11) PN Sustentacular: 0.036| (12) Cortex ZF: 0.027| (13) Macrophage: 0.019| (14) Cortex ZG: 0.01| (15) Dendritic cell: 0.051| (16) T cell…
Elk3	(3) Endothelial	4.99421	1.14412e-19	4.37832e-15	0.978	0.317579	(0) E ADR Chromaffin: 2.70958458633759e-237| (1) PN NOR Chromaffin: 9.57643681467882e-194| (2) PN ADR Chromaffin: 7.181956097818e-205| (4) Macrophage: 3.82728319653822e-160| (5) E NOR Chromaffin: 7.60864269082188e-161| (6) E Glia|SCP: 1.08102949593934e-100| (7) Cortex ZG: 2.68164974564264e-153| (8) Cycling TH+: 6.58588522542892e-141| (9) Cortex X Zone: 6.84855344963637e-141| (10) E Neuroblast: 1.…	(0) E ADR Chromaffin: 1.03690382949967e-232| (1) PN NOR Chromaffin: 3.66471084024129e-189| (2) PN ADR Chromaffin: 2.74839095951299e-200| (4) Macrophage: 1.46462473365125e-155| (5) E NOR Chromaffin: 2.91167538492372e-156| (6) E Glia|SCP: 4.13688367506068e-96| (7) Cortex ZG: 1.02621372466253e-148| (8) Cycling TH+: 2.52028655806714e-136| (9) Cortex X Zone: 2.62080443410685e-136| (10) E Neuroblast: 7…	(0) E ADR Chromaffin: 5.29168422318234| (1) PN NOR Chromaffin: 4.32372343477706| (2) PN ADR Chromaffin: 4.75895552630014| (4) Macrophage: 4.23066012527729| (5) E NOR Chromaffin: 5.14989874864872| (6) E Glia|SCP: 2.84877982850953| (7) Cortex ZG: 6.91976073896886| (8) Cycling TH+: 5.75163011760843| (9) Cortex X Zone: 8.24891307671382| (10) E Neuroblast: 5.74409742014463| (11) PN Sustentacular: 3.59…	(0) E ADR Chromaffin: 0.324| (1) PN NOR Chromaffin: 0.512| (2) PN ADR Chromaffin: 0.404| (4) Macrophage: 0.39| (5) E NOR Chromaffin: 0.287| (6) E Glia|SCP: 0.723| (7) Cortex ZG: 0.148| (8) Cycling TH+: 0.211| (9) Cortex X Zone: 0.088| (10) E Neuroblast: 0.195| (11) PN Sustentacular: 0.415| (12) Cortex ZF: 0.118| (13) Macrophage: 0.638| (14) Cortex ZG: 0.194| (15) Dendritic cell: 0.323| (16) T cel…
Fabp4	(3) Endothelial	7.12163	3.79211e-20	1.45116e-15	0.978	0.255474	(0) E ADR Chromaffin: 4.62661271395864e-235| (1) PN NOR Chromaffin: 1.38017311919096e-257| (2) PN ADR Chromaffin: 3.25811941140933e-253| (4) Macrophage: 1.15588802646836e-183| (5) E NOR Chromaffin: 7.16815707174863e-167| (6) E Glia|SCP: 8.68616549765714e-141| (7) Cortex ZG: 5.27010851693818e-156| (8) Cycling TH+: 1.0215110482749e-138| (9) Cortex X Zone: 1.3315552099041e-141| (10) E Neuroblast: 3.…	(0) E ADR Chromaffin: 1.77051215337769e-230| (1) PN NOR Chromaffin: 5.28164649251995e-253| (2) PN ADR Chromaffin: 1.24681713635812e-248| (4) Macrophage: 4.4233522996891e-179| (5) E NOR Chromaffin: 2.74311034821677e-162| (6) E Glia|SCP: 3.32402181264343e-136| (7) Cortex ZG: 2.0167651272619e-151| (8) Cycling TH+: 3.9091184795384e-134| (9) Cortex X Zone: 5.09559547726099e-137| (10) E Neuroblast: 1.1…	(0) E ADR Chromaffin: 6.15622262614949| (1) PN NOR Chromaffin: 8.72626174884925| (2) PN ADR Chromaffin: 8.21651496990453| (4) Macrophage: 8.00568517691246| (5) E NOR Chromaffin: 6.73373717095882| (6) E Glia|SCP: 5.31425735112048| (7) Cortex ZG: 8.84931112634517| (8) Cycling TH+: 6.12593283034598| (9) Cortex X Zone: 9.72375106852578| (10) E Neuroblast: 6.07823946909366| (11) PN Sustentacular: 6.29…	(0) E ADR Chromaffin: 0.416| (1) PN NOR Chromaffin: 0.128| (2) PN ADR Chromaffin: 0.133| (4) Macrophage: 0.318| (5) E NOR Chromaffin: 0.337| (6) E Glia|SCP: 0.42| (7) Cortex ZG: 0.14| (8) Cycling TH+: 0.35| (9) Cortex X Zone: 0.088| (10) E Neuroblast: 0.406| (11) PN Sustentacular: 0.286| (12) Cortex ZF: 0.118| (13) Macrophage: 0.314| (14) Cortex ZG: 0.155| (15) Dendritic cell: 0.242| (16) T cell:…
Ptpru	(3) Endothelial	6.70065	6.45184e-18	2.46899e-13	0.926	0.169526	(0) E ADR Chromaffin: 5.54919847382043e-235| (1) PN NOR Chromaffin: 9.32422535528527e-195| (2) PN ADR Chromaffin: 1.06998073087623e-215| (4) Macrophage: 1.02712234402294e-169| (5) E NOR Chromaffin: 1.55144242205547e-136| (6) E Glia|SCP: 1.07302455641527e-138| (7) Cortex ZG: 3.53251229125523e-140| (8) Cycling TH+: 3.32102123018099e-114| (9) Cortex X Zone: 3.38757864919196e-115| (10) E Neuroblast: …	(0) E ADR Chromaffin: 2.1235672719616e-230| (1) PN NOR Chromaffin: 3.56819455896057e-190| (2) PN ADR Chromaffin: 4.09460226091715e-211| (4) Macrophage: 3.93059178610697e-165| (5) E NOR Chromaffin: 5.93705986072188e-132| (6) E Glia|SCP: 4.10625037248994e-134| (7) Cortex ZG: 1.35182180361755e-135| (8) Cycling TH+: 1.27088840436566e-109| (9) Cortex X Zone: 1.29635859747278e-110| (10) E Neuroblast: 6…	(0) E ADR Chromaffin: 5.80603791283203| (1) PN NOR Chromaffin: 5.15803630139533| (2) PN ADR Chromaffin: 6.1683980577515| (4) Macrophage: 8.75714599895439| (5) E NOR Chromaffin: 4.68167438424436| (6) E Glia|SCP: 6.10568561733326| (7) Cortex ZG: 8.76747426736697| (8) Cycling TH+: 4.83531263799186| (9) Cortex X Zone: 5.72038555751686| (10) E Neuroblast: 6.05323369357978| (11) PN Sustentacular: 8.269…	(0) E ADR Chromaffin: 0.171| (1) PN NOR Chromaffin: 0.255| (2) PN ADR Chromaffin: 0.159| (4) Macrophage: 0.189| (5) E NOR Chromaffin: 0.258| (6) E Glia|SCP: 0.112| (7) Cortex ZG: 0.12| (8) Cycling TH+: 0.294| (9) Cortex X Zone: 0.212| (10) E Neuroblast: 0.135| (11) PN Sustentacular: 0.076| (12) Cortex ZF: 0.155| (13) Macrophage: 0.086| (14) Cortex ZG: 0.029| (15) Dendritic cell: 0.071| (16) T cel…
Sema3f	(3) Endothelial	6.69229	1.54654e-14	5.9183e-10	0.796	0.0512105	(0) E ADR Chromaffin: 8.21897100971986e-234| (1) PN NOR Chromaffin: 2.85340056321067e-203| (2) PN ADR Chromaffin: 4.78305707342049e-194| (4) Macrophage: 1.35355186087018e-135| (5) E NOR Chromaffin: 8.44670804704083e-131| (6) E Glia|SCP: 7.97391858743089e-104| (7) Cortex ZG: 4.40070194721127e-113| (8) Cycling TH+: 2.7222272208591e-104| (9) Cortex X Zone: 7.67872306671197e-102| (10) E Neuroblast: 7…	(0) E ADR Chromaffin: 3.1452358259996e-229| (1) PN NOR Chromaffin: 1.09193932752946e-198| (2) PN ADR Chromaffin: 1.83038028085655e-189| (4) Macrophage: 5.179772261178e-131| (5) E NOR Chromaffin: 3.23238623544159e-126| (6) E Glia|SCP: 3.05145916503805e-99| (7) Cortex ZG: 1.68406062115881e-108| (8) Cycling TH+: 1.04174191287836e-99| (9) Cortex X Zone: 2.93849374316934e-97| (10) E Neuroblast: 2.8458…	(0) E ADR Chromaffin: 7.83294937047458| (1) PN NOR Chromaffin: 8.42016370148225| (2) PN ADR Chromaffin: 7.5688605642909| (4) Macrophage: 7.61914679176169| (5) E NOR Chromaffin: 6.7299383374516| (6) E Glia|SCP: 5.09454027164326| (7) Cortex ZG: 8.36426443431149| (8) Cycling TH+: 6.69859006055203| (9) Cortex X Zone: 8.74317770837172| (10) E Neuroblast: 7.49455985412215| (11) PN Sustentacular: 6.0792…	(0) E ADR Chromaffin: 0.019| (1) PN NOR Chromaffin: 0.027| (2) PN ADR Chromaffin: 0.044| (4) Macrophage: 0.09| (5) E NOR Chromaffin: 0.026| (6) E Glia|SCP: 0.078| (7) Cortex ZG: 0.03| (8) Cycling TH+: 0.045| (9) Cortex X Zone: 0.015| (10) E Neuroblast: 0.032| (11) PN Sustentacular: 0.062| (12) Cortex ZF: 0.018| (13) Macrophage: 0.067| (14) Cortex ZG: 0.087| (15) Dendritic cell: 0.04| (16) T cell:…
Ecscr	(3) Endothelial	7.67019	4.44484e-14	1.70095e-09	0.779	0.0273684	(0) E ADR Chromaffin: 1.24145068204962e-232| (1) PN NOR Chromaffin: 1.67287431416638e-205| (2) PN ADR Chromaffin: 3.19290842678294e-197| (4) Macrophage: 1.39524020128209e-138| (5) E NOR Chromaffin: 4.91147592414975e-131| (6) E Glia|SCP: 2.19035547925026e-112| (7) Cortex ZG: 9.31183050968319e-109| (8) Cycling TH+: 1.26284952751985e-105| (9) Cortex X Zone: 2.34448460582851e-98| (10) E Neuroblast: 2…	(0) E ADR Chromaffin: 4.7507834700675e-228| (1) PN NOR Chromaffin: 6.40175542545189e-201| (2) PN ADR Chromaffin: 1.22186219676129e-192| (4) Macrophage: 5.3393052022663e-134| (5) E NOR Chromaffin: 1.87952360665363e-126| (6) E Glia|SCP: 8.38205234799491e-108| (7) Cortex ZG: 3.56345129944556e-104| (8) Cycling TH+: 4.83267257191297e-101| (9) Cortex X Zone: 8.97187368958453e-94| (10) E Neuroblast: 1.0…	(0) E ADR Chromaffin: 9.00208317768091| (1) PN NOR Chromaffin: 9.81153321655547| (2) PN ADR Chromaffin: 7.33729398186338| (4) Macrophage: 8.7705403710289| (5) E NOR Chromaffin: 8.51161822675926| (6) E Glia|SCP: 7.0401040415096| (7) Cortex ZG: 9.1868134918176| (8) Cycling TH+: 7.75796135806338| (9) Cortex X Zone: 8.53546609264999| (10) E Neuroblast: 7.19451414563706| (11) PN Sustentacular: 7.39888…	(0) E ADR Chromaffin: 0.012| (1) PN NOR Chromaffin: 0.008| (2) PN ADR Chromaffin: 0.02| (4) Macrophage: 0.045| (5) E NOR Chromaffin: 0.012| (6) E Glia|SCP: 0.022| (7) Cortex ZG: 0.043| (8) Cycling TH+: 0.016| (9) Cortex X Zone: 0.018| (10) E Neuroblast: 0.032| (11) PN Sustentacular: 0.022| (12) Cortex ZF: 0.018| (13) Macrophage: 0.029| (14) Cortex ZG: 0.029| (15) Dendritic cell: 0.02| (16) T cell…
Fzd4	(3) Endothelial	6.46072	5.45637e-14	2.08804e-09	0.81	0.111263	(0) E ADR Chromaffin: 1.2524532075443e-232| (1) PN NOR Chromaffin: 7.82489991414259e-204| (2) PN ADR Chromaffin: 1.77499728827005e-203| (4) Macrophage: 5.00809115390228e-133| (5) E NOR Chromaffin: 1.91811626338541e-137| (6) E Glia|SCP: 1.21872625184715e-104| (7) Cortex ZG: 1.19269487056255e-111| (8) Cycling TH+: 5.52056810628712e-107| (9) Cortex X Zone: 1.10470861032025e-32| (10) E Neuroblast: 3.…	(0) E ADR Chromaffin: 4.79288793463052e-228| (1) PN NOR Chromaffin: 2.99443269914409e-199| (2) PN ADR Chromaffin: 6.79255962275182e-199| (4) Macrophage: 1.91649632277532e-128| (5) E NOR Chromaffin: 7.3402473167233e-133| (6) E Glia|SCP: 4.66382162056868e-100| (7) Cortex ZG: 4.56420473066876e-107| (8) Cycling TH+: 2.11261100291395e-102| (9) Cortex X Zone: 4.22749890997352e-28| (10) E Neuroblast: 1.…	(0) E ADR Chromaffin: 7.69286762789153| (1) PN NOR Chromaffin: 7.85503027020285| (2) PN ADR Chromaffin: 8.20584264469951| (4) Macrophage: 6.55511353489698| (5) E NOR Chromaffin: 8.48791980207305| (6) E Glia|SCP: 5.2526952642568| (7) Cortex ZG: 7.61975409391068| (8) Cycling TH+: 6.85314222846786| (9) Cortex X Zone: 2.51507620621977| (10) E Neuroblast: 7.91747780770714| (11) PN Sustentacular: 5.222…	(0) E ADR Chromaffin: 0.032| (1) PN NOR Chromaffin: 0.038| (2) PN ADR Chromaffin: 0.032| (4) Macrophage: 0.124| (5) E NOR Chromaffin: 0.018| (6) E Glia|SCP: 0.1| (7) Cortex ZG: 0.065| (8) Cycling TH+: 0.048| (9) Cortex X Zone: 0.647| (10) E Neuroblast: 0.016| (11) PN Sustentacular: 0.08| (12) Cortex ZF: 0.045| (13) Macrophage: 0.048| (14) Cortex ZG: 0.126| (15) Dendritic cell: 0.061| (16) T cell:…
Prex2	(3) Endothelial	5.97478	2.9005e-08	0.00110996	0.805	0.124526	(0) E ADR Chromaffin: 2.9110484601577e-232| (1) PN NOR Chromaffin: 1.95853427962343e-176| (2) PN ADR Chromaffin: 3.45075324463129e-189| (4) Macrophage: 2.54181463405951e-134| (5) E NOR Chromaffin: 3.96033961343371e-129| (6) E Glia|SCP: 1.45962835314579e-70| (7) Cortex ZG: 2.04560502357672e-115| (8) Cycling TH+: 2.29048965115935e-101| (9) Cortex X Zone: 1.74818171884942e-100| (10) E Neuroblast: 2.…	(0) E ADR Chromaffin: 1.11400002473315e-227| (1) PN NOR Chromaffin: 7.49491898126295e-172| (2) PN ADR Chromaffin: 1.3205342516555e-184| (4) Macrophage: 9.72701624161894e-130| (5) E NOR Chromaffin: 1.51554276326881e-124| (6) E Glia|SCP: 5.5857057818183e-66| (7) Cortex ZG: 7.82812130422338e-111| (8) Cycling TH+: 8.7652457970566e-97| (9) Cortex X Zone: 6.68994180169296e-96| (10) E Neuroblast: 9.4677…	(0) E ADR Chromaffin: 8.01590219393199| (1) PN NOR Chromaffin: 5.72689075659084| (2) PN ADR Chromaffin: 7.68326079586636| (4) Macrophage: 6.93408520362262| (5) E NOR Chromaffin: 6.63329477856419| (6) E Glia|SCP: 3.29051403738346| (7) Cortex ZG: 8.47972072152329| (8) Cycling TH+: 6.15314841038953| (9) Cortex X Zone: 7.41639558717823| (10) E Neuroblast: 5.56247695373601| (11) PN Sustentacular: 0.67…	(0) E ADR Chromaffin: 0.03| (1) PN NOR Chromaffin: 0.097| (2) PN ADR Chromaffin: 0.068| (4) Macrophage: 0.101| (5) E NOR Chromaffin: 0.049| (6) E Glia|SCP: 0.274| (7) Cortex ZG: 0.028| (8) Cycling TH+: 0.075| (9) Cortex X Zone: 0.038| (10) E Neuroblast: 0.068| (11) PN Sustentacular: 0.67| (12) Cortex ZF: 0.082| (13) Macrophage: 0.086| (14) Cortex ZG: 0.078| (15) Dendritic cell: 0.051| (16) T cell…
Rapgef5	(3) Endothelial	5.80425	6.81575e-16	2.60825e-11	0.916	0.189789	(0) E ADR Chromaffin: 8.71234324115586e-231| (1) PN NOR Chromaffin: 4.76226473217278e-205| (2) PN ADR Chromaffin: 1.20553953698447e-146| (4) Macrophage: 1.86064274146802e-155| (5) E NOR Chromaffin: 1.01924881188237e-139| (6) E Glia|SCP: 7.28902982924686e-141| (7) Cortex ZG: 1.80805273496496e-140| (8) Cycling TH+: 1.10819878494482e-82| (9) Cortex X Zone: 3.42003975437722e-125| (10) E Neuroblast: 1…	(0) E ADR Chromaffin: 3.33403951152553e-226| (1) PN NOR Chromaffin: 1.82242346770788e-200| (2) PN ADR Chromaffin: 4.61335870013217e-142| (4) Macrophage: 7.12030764304982e-151| (5) E NOR Chromaffin: 3.90046135331145e-135| (6) E Glia|SCP: 2.78936593505619e-136| (7) Cortex ZG: 6.9190562061639e-136| (8) Cycling TH+: 4.24085511022683e-78| (9) Cortex X Zone: 1.30878081320507e-120| (10) E Neuroblast: 4.…	(0) E ADR Chromaffin: 5.82258202598417| (1) PN NOR Chromaffin: 5.83349401575939| (2) PN ADR Chromaffin: 3.73879226458671| (4) Macrophage: 5.9539818238593| (5) E NOR Chromaffin: 5.13484759566106| (6) E Glia|SCP: 7.27096576615407| (7) Cortex ZG: 7.87127144997688| (8) Cycling TH+: 3.43607497496421| (9) Cortex X Zone: 8.45608410128163| (10) E Neuroblast: 3.12560083191623| (11) PN Sustentacular: 4.777…	(0) E ADR Chromaffin: 0.151| (1) PN NOR Chromaffin: 0.173| (2) PN ADR Chromaffin: 0.385| (4) Macrophage: 0.232| (5) E NOR Chromaffin: 0.169| (6) E Glia|SCP: 0.068| (7) Cortex ZG: 0.053| (8) Cycling TH+: 0.441| (9) Cortex X Zone: 0.053| (10) E Neuroblast: 0.498| (11) PN Sustentacular: 0.201| (12) Cortex ZF: 0.045| (13) Macrophage: 0.171| (14) Cortex ZG: 0.087| (15) Dendritic cell: 0.111| (16) T ce…
Gpihbp1	(3) Endothelial	8.3291	4.41467e-14	1.68941e-09	0.833	0.0841053	(0) E ADR Chromaffin: 6.98406096858913e-230| (1) PN NOR Chromaffin: 1.27136212598543e-210| (2) PN ADR Chromaffin: 8.22603306677506e-208| (4) Macrophage: 1.72457093090814e-140| (5) E NOR Chromaffin: 3.25037959512837e-138| (6) E Glia|SCP: 7.09118009235537e-123| (7) Cortex ZG: 1.93420368254108e-118| (8) Cycling TH+: 2.78897103645559e-113| (9) Cortex X Zone: 1.85079972498751e-106| (10) E Neuroblast: …	(0) E ADR Chromaffin: 2.67266045145969e-225| (1) PN NOR Chromaffin: 4.86524858372106e-206| (2) PN ADR Chromaffin: 3.14793833399348e-203| (4) Macrophage: 6.59958803839927e-136| (5) E NOR Chromaffin: 1.24385526346372e-133| (6) E Glia|SCP: 2.71365279774255e-118| (7) Cortex ZG: 7.40181065234819e-114| (8) Cycling TH+: 1.06728343623083e-108| (9) Cortex X Zone: 7.08264038758219e-102| (10) E Neuroblast: …	(0) E ADR Chromaffin: 7.95168837576691| (1) PN NOR Chromaffin: 9.19458182949309| (2) PN ADR Chromaffin: 8.85643208209363| (4) Macrophage: 9.8132588627485| (5) E NOR Chromaffin: 7.87689662436566| (6) E Glia|SCP: 7.45432277421453| (7) Cortex ZG: 9.02300189769614| (8) Cycling TH+: 8.296742975236| (9) Cortex X Zone: 9.72910444051818| (10) E Neuroblast: 7.81040884585548| (11) PN Sustentacular: 8.85665…	(0) E ADR Chromaffin: 0.064| (1) PN NOR Chromaffin: 0.05| (2) PN ADR Chromaffin: 0.05| (4) Macrophage: 0.145| (5) E NOR Chromaffin: 0.053| (6) E Glia|SCP: 0.036| (7) Cortex ZG: 0.07| (8) Cycling TH+: 0.056| (9) Cortex X Zone: 0.056| (10) E Neuroblast: 0.052| (11) PN Sustentacular: 0.076| (12) Cortex ZF: 0.045| (13) Macrophage: 0.095| (14) Cortex ZG: 0.117| (15) Dendritic cell: 0.061| (16) T cell:…
Plscr2	(3) Endothelial	7.74936	6.72985e-14	2.57538e-09	0.773	0.0724211	(0) E ADR Chromaffin: 1.25540557912331e-228| (1) PN NOR Chromaffin: 5.73682635822947e-198| (2) PN ADR Chromaffin: 7.21225148068735e-192| (4) Macrophage: 1.27619467093095e-127| (5) E NOR Chromaffin: 4.24445636388778e-128| (6) E Glia|SCP: 4.74588284201342e-108| (7) Cortex ZG: 1.46607388195058e-102| (8) Cycling TH+: 3.86860271282892e-104| (9) Cortex X Zone: 6.98573033038067e-98| (10) E Neuroblast: 1…	(0) E ADR Chromaffin: 4.8041860701891e-224| (1) PN NOR Chromaffin: 2.19536871076725e-193| (2) PN ADR Chromaffin: 2.75998439662943e-187| (4) Macrophage: 4.88374176671856e-123| (5) E NOR Chromaffin: 1.62426856133258e-123| (6) E Glia|SCP: 1.8161544459817e-103| (7) Cortex ZG: 5.61037153144848e-98| (8) Cycling TH+: 1.48043688614537e-99| (9) Cortex X Zone: 2.67329928283008e-93| (10) E Neuroblast: 4.919…	(0) E ADR Chromaffin: 9.00282153139448| (1) PN NOR Chromaffin: 10.0409244668701| (2) PN ADR Chromaffin: 9.43823770658387| (4) Macrophage: 9.76974943579422| (5) E NOR Chromaffin: 9.08118185741643| (6) E Glia|SCP: 7.03656224902695| (7) Cortex ZG: 6.95432559405009| (8) Cycling TH+: 8.3065773357114| (9) Cortex X Zone: 9.63733019872053| (10) E Neuroblast: 10.2211395615237| (11) PN Sustentacular: 2.600…	(0) E ADR Chromaffin: 0.013| (1) PN NOR Chromaffin: 0.022| (2) PN ADR Chromaffin: 0.031| (4) Macrophage: 0.104| (5) E NOR Chromaffin: 0.02| (6) E Glia|SCP: 0.041| (7) Cortex ZG: 0.07| (8) Cycling TH+: 0.016| (9) Cortex X Zone: 0.009| (10) E Neuroblast: 0.004| (11) PN Sustentacular: 0.362| (12) Cortex ZF: 0.036| (13) Macrophage: 0.057| (14) Cortex ZG: 0.029| (15) Dendritic cell: 0.101| (16) T cell…
Plpp3	(3) Endothelial	5.72769	9.18915e-21	3.5165e-16	0.997	0.563053	(0) E ADR Chromaffin: 5.5759281309842e-228| (1) PN NOR Chromaffin: 3.54074590001245e-234| (2) PN ADR Chromaffin: 2.5923225800311e-217| (4) Macrophage: 4.01112487906392e-191| (5) E NOR Chromaffin: 4.23630890033316e-175| (6) E Glia|SCP: 1.1913145629688e-148| (7) Cortex ZG: 9.51798603623865e-150| (8) Cycling TH+: 7.79526205783965e-147| (9) Cortex X Zone: 1.39764137366315e-62| (10) E Neuroblast: 5.03…	(0) E ADR Chromaffin: 2.13379617716503e-223| (1) PN NOR Chromaffin: 1.35497264101676e-229| (2) PN ADR Chromaffin: 9.920300049263e-213| (4) Macrophage: 1.53497726872018e-186| (5) E NOR Chromaffin: 1.62115068997949e-170| (6) E Glia|SCP: 4.55892256956901e-144| (7) Cortex ZG: 3.64234289634781e-145| (8) Cycling TH+: 2.98309088429408e-142| (9) Cortex X Zone: 5.34849400873414e-58| (10) E Neuroblast: 1.9…	(0) E ADR Chromaffin: 4.0206982340205| (1) PN NOR Chromaffin: 5.92331995622436| (2) PN ADR Chromaffin: 4.53346788902119| (4) Macrophage: 9.62973424652136| (5) E NOR Chromaffin: 5.78480752594568| (6) E Glia|SCP: 4.18360001118351| (7) Cortex ZG: 4.8669234493766| (8) Cycling TH+: 5.39012856966259| (9) Cortex X Zone: 1.38950438158878| (10) E Neuroblast: 6.8842461856355| (11) PN Sustentacular: 3.35795…	(0) E ADR Chromaffin: 0.786| (1) PN NOR Chromaffin: 0.444| (2) PN ADR Chromaffin: 0.748| (4) Macrophage: 0.424| (5) E NOR Chromaffin: 0.413| (6) E Glia|SCP: 0.68| (7) Cortex ZG: 0.679| (8) Cycling TH+: 0.447| (9) Cortex X Zone: 1| (10) E Neuroblast: 0.259| (11) PN Sustentacular: 0.826| (12) Cortex ZF: 0.809| (13) Macrophage: 0.333| (14) Cortex ZG: 0.602| (15) Dendritic cell: 0.313| (16) T cell: 0…
Fgd5	(3) Endothelial	6.65727	5.93928e-11	2.27284e-06	0.837	0.129421	(0) E ADR Chromaffin: 1.98534415947984e-223| (1) PN NOR Chromaffin: 7.49004052970867e-208| (2) PN ADR Chromaffin: 3.15184500640797e-207| (4) Macrophage: 2.01910002160274e-149| (5) E NOR Chromaffin: 5.31291262907602e-131| (6) E Glia|SCP: 1.12834959655923e-09| (7) Cortex ZG: 1.7577598763446e-122| (8) Cycling TH+: 3.28346104509172e-107| (9) Cortex X Zone: 1.61430566756261e-106| (10) E Neuroblast: 3.…	(0) E ADR Chromaffin: 7.59751502949745e-219| (1) PN NOR Chromaffin: 2.86628870990891e-203| (2) PN ADR Chromaffin: 1.2061480470522e-202| (4) Macrophage: 7.72669196266935e-145| (5) E NOR Chromaffin: 2.03314540489481e-126| (6) E Glia|SCP: 4.31796823611285e-05| (7) Cortex ZG: 6.72659549479551e-118| (8) Cycling TH+: 1.2565148727357e-102| (9) Cortex X Zone: 6.1776249286286e-102| (10) E Neuroblast: 1.41…	(0) E ADR Chromaffin: 6.24266267724808| (1) PN NOR Chromaffin: 8.00158466310226| (2) PN ADR Chromaffin: 7.53169052483735| (4) Macrophage: 8.481679222754| (5) E NOR Chromaffin: 6.05390385361237| (6) E Glia|SCP: 1.20051829154596| (7) Cortex ZG: 9.0657396548225| (8) Cycling TH+: 6.77814973522114| (9) Cortex X Zone: 8.21422695016244| (10) E Neuroblast: 6.386976081919| (11) PN Sustentacular: 2.1558881…	(0) E ADR Chromaffin: 0.065| (1) PN NOR Chromaffin: 0.055| (2) PN ADR Chromaffin: 0.049| (4) Macrophage: 0.083| (5) E NOR Chromaffin: 0.073| (6) E Glia|SCP: 0.801| (7) Cortex ZG: 0.033| (8) Cycling TH+: 0.099| (9) Cortex X Zone: 0.044| (10) E Neuroblast: 0.056| (11) PN Sustentacular: 0.469| (12) Cortex ZF: 0.036| (13) Macrophage: 0.076| (14) Cortex ZG: 0.039| (15) Dendritic cell: 0.03| (16) T cel…
Arhgap29	(3) Endothelial	5.45949	1.04959e-09	4.01657e-05	0.855	0.186632	(0) E ADR Chromaffin: 1.43590423372205e-222| (1) PN NOR Chromaffin: 3.67499468424338e-221| (2) PN ADR Chromaffin: 9.28508477759988e-211| (4) Macrophage: 5.43796349781723e-153| (5) E NOR Chromaffin: 5.9869705552167e-132| (6) E Glia|SCP: 5.86406297892544e-88| (7) Cortex ZG: 8.33368039114665e-86| (8) Cycling TH+: 6.87959967878105e-108| (9) Cortex X Zone: 6.76143844833272e-69| (10) E Neuroblast: 1.10…	(0) E ADR Chromaffin: 5.49491832160754e-218| (1) PN NOR Chromaffin: 1.40634696576626e-216| (2) PN ADR Chromaffin: 3.55321624269192e-206| (4) Macrophage: 2.0809998713447e-148| (5) E NOR Chromaffin: 2.29109389207033e-127| (6) E Glia|SCP: 2.24405962077519e-83| (7) Cortex ZG: 3.189132812084e-81| (8) Cycling TH+: 2.63268520507593e-103| (9) Cortex X Zone: 2.58746726540797e-64| (10) E Neuroblast: 4.2226…	(0) E ADR Chromaffin: 6.4388465014535| (1) PN NOR Chromaffin: 8.62282987691383| (2) PN ADR Chromaffin: 7.65065424715693| (4) Macrophage: 8.71569317612541| (5) E NOR Chromaffin: 5.70745546286451| (6) E Glia|SCP: 3.78746278769913| (7) Cortex ZG: 3.88001004286937| (8) Cycling TH+: 5.89962149884196| (9) Cortex X Zone: 3.48646352754126| (10) E Neuroblast: 6.06818295925674| (11) PN Sustentacular: 4.023…	(0) E ADR Chromaffin: 0.101| (1) PN NOR Chromaffin: 0.043| (2) PN ADR Chromaffin: 0.065| (4) Macrophage: 0.104| (5) E NOR Chromaffin: 0.114| (6) E Glia|SCP: 0.313| (7) Cortex ZG: 0.336| (8) Cycling TH+: 0.142| (9) Cortex X Zone: 0.418| (10) E Neuroblast: 0.092| (11) PN Sustentacular: 0.192| (12) Cortex ZF: 0.2| (13) Macrophage: 0.105| (14) Cortex ZG: 0.33| (15) Dendritic cell: 0.081| (16) T cell:…
Cd200	(3) Endothelial	5.66869	3.58133e-14	1.3705e-09	0.946	0.343684	(0) E ADR Chromaffin: 1.30814678739638e-220| (1) PN NOR Chromaffin: 1.3781186643977e-153| (2) PN ADR Chromaffin: 1.610631019937e-204| (4) Macrophage: 2.38048374617288e-174| (5) E NOR Chromaffin: 2.67878873974722e-119| (6) E Glia|SCP: 3.09427573046519e-31| (7) Cortex ZG: 6.5769108285912e-138| (8) Cycling TH+: 2.15792025919808e-121| (9) Cortex X Zone: 5.5329000887679e-134| (10) E Neuroblast: 2.7148…	(0) E ADR Chromaffin: 5.00601612600845e-216| (1) PN NOR Chromaffin: 5.27378450491711e-149| (2) PN ADR Chromaffin: 6.1635627870949e-200| (4) Macrophage: 9.10963519985437e-170| (5) E NOR Chromaffin: 1.02511887492647e-114| (6) E Glia|SCP: 1.18411743653442e-26| (7) Cortex ZG: 2.51685223588528e-133| (8) Cycling TH+: 8.25792924789922e-117| (9) Cortex X Zone: 2.1173302059697e-129| (10) E Neuroblast: 1.0…	(0) E ADR Chromaffin: 5.56685118930287| (1) PN NOR Chromaffin: 3.71349484735308| (2) PN ADR Chromaffin: 5.63322368554256| (4) Macrophage: 9.65172465799488| (5) E NOR Chromaffin: 3.82048461664359| (6) E Glia|SCP: 1.28632203757223| (7) Cortex ZG: 6.52162122430097| (8) Cycling TH+: 5.28135144790957| (9) Cortex X Zone: 10.2430460990762| (10) E Neuroblast: 4.25447516895081| (11) PN Sustentacular: 2.54…	(0) E ADR Chromaffin: 0.307| (1) PN NOR Chromaffin: 0.628| (2) PN ADR Chromaffin: 0.287| (4) Macrophage: 0.244| (5) E NOR Chromaffin: 0.593| (6) E Glia|SCP: 0.876| (7) Cortex ZG: 0.238| (8) Cycling TH+: 0.369| (9) Cortex X Zone: 0.056| (10) E Neuroblast: 0.446| (11) PN Sustentacular: 0.656| (12) Cortex ZF: 0.127| (13) Macrophage: 0.114| (14) Cortex ZG: 0.097| (15) Dendritic cell: 0.202| (16) T ce…
Clec14a	(3) Endothelial	7.47069	1.86142e-13	7.12327e-09	0.756	0.0947368	(0) E ADR Chromaffin: 1.48418985157734e-220| (1) PN NOR Chromaffin: 1.59582227634667e-190| (2) PN ADR Chromaffin: 2.1304032628683e-186| (4) Macrophage: 8.37104281249137e-120| (5) E NOR Chromaffin: 1.64844321194574e-120| (6) E Glia|SCP: 8.32588153813206e-29| (7) Cortex ZG: 9.04540043044063e-104| (8) Cycling TH+: 6.4952723222824e-100| (9) Cortex X Zone: 1.2626115768357e-94| (10) E Neuroblast: 3.816…	(0) E ADR Chromaffin: 5.67969772401618e-216| (1) PN NOR Chromaffin: 6.10689268712342e-186| (2) PN ADR Chromaffin: 8.1526272063444e-182| (4) Macrophage: 3.2034306634842e-115| (5) E NOR Chromaffin: 6.30826248347395e-116| (6) E Glia|SCP: 3.18614834701238e-24| (7) Cortex ZG: 3.46149383672102e-99| (8) Cycling TH+: 2.48561081229103e-95| (9) Cortex X Zone: 4.83176198223485e-90| (10) E Neuroblast: 1.4603…	(0) E ADR Chromaffin: 9.07778167797312| (1) PN NOR Chromaffin: 9.72161237031461| (2) PN ADR Chromaffin: 9.07085731019973| (4) Macrophage: 9.98196726865169| (5) E NOR Chromaffin: 7.20346113552148| (6) E Glia|SCP: 1.74257171727643| (7) Cortex ZG: 9.43086527621364| (8) Cycling TH+: 8.05556559503862| (9) Cortex X Zone: 10.0044628051635| (10) E Neuroblast: 7.54549195874504| (11) PN Sustentacular: 1.90…	(0) E ADR Chromaffin: 0.016| (1) PN NOR Chromaffin: 0.025| (2) PN ADR Chromaffin: 0.029| (4) Macrophage: 0.122| (5) E NOR Chromaffin: 0.035| (6) E Glia|SCP: 0.534| (7) Cortex ZG: 0.038| (8) Cycling TH+: 0.021| (9) Cortex X Zone: 0.009| (10) E Neuroblast: 0.02| (11) PN Sustentacular: 0.402| (12) Cortex ZF: 0.055| (13) Macrophage: 0.029| (14) Cortex ZG: 0.01| (15) Dendritic cell: 0.051| (16) T cell…
Slc9a3r2	(3) Endothelial	5.35757	2.01221e-18	7.70033e-14	0.968	0.334	(0) E ADR Chromaffin: 8.59069023533563e-220| (1) PN NOR Chromaffin: 8.59951648762666e-217| (2) PN ADR Chromaffin: 3.7256391200036e-195| (4) Macrophage: 3.75260112857761e-185| (5) E NOR Chromaffin: 2.93110295902991e-157| (6) E Glia|SCP: 1.53410833711344e-102| (7) Cortex ZG: 2.70610405734212e-149| (8) Cycling TH+: 6.24832972506279e-134| (9) Cortex X Zone: 9.70745084207269e-137| (10) E Neuroblast: 3…	(0) E ADR Chromaffin: 3.28748533925824e-215| (1) PN NOR Chromaffin: 3.29086296948497e-212| (2) PN ADR Chromaffin: 1.42572757844298e-190| (4) Macrophage: 1.43604539988408e-180| (5) E NOR Chromaffin: 1.12167448036157e-152| (6) E Glia|SCP: 5.87072578446571e-98| (7) Cortex ZG: 1.03557190066368e-144| (8) Cycling TH+: 2.39111081918703e-129| (9) Cortex X Zone: 3.71484728824438e-132| (10) E Neuroblast: 1…	(0) E ADR Chromaffin: 4.6166949044029| (1) PN NOR Chromaffin: 5.29612351373951| (2) PN ADR Chromaffin: 4.32758406518088| (4) Macrophage: 8.14382244220612| (5) E NOR Chromaffin: 4.97743862931598| (6) E Glia|SCP: 2.62340505747646| (7) Cortex ZG: 6.82372150940719| (8) Cycling TH+: 5.20119410966699| (9) Cortex X Zone: 7.21601548261305| (10) E Neuroblast: 4.5251683474128| (11) PN Sustentacular: 2.6797…	(0) E ADR Chromaffin: 0.444| (1) PN NOR Chromaffin: 0.347| (2) PN ADR Chromaffin: 0.521| (4) Macrophage: 0.215| (5) E NOR Chromaffin: 0.368| (6) E Glia|SCP: 0.704| (7) Cortex ZG: 0.198| (8) Cycling TH+: 0.364| (9) Cortex X Zone: 0.115| (10) E Neuroblast: 0.414| (11) PN Sustentacular: 0.634| (12) Cortex ZF: 0.255| (13) Macrophage: 0.171| (14) Cortex ZG: 0.117| (15) Dendritic cell: 0.152| (16) T ce…
Rsad2	(3) Endothelial	6.81737	3.71923e-12	1.42328e-07	0.764	0.106263	(0) E ADR Chromaffin: 9.3127154525188e-219| (1) PN NOR Chromaffin: 5.915691801616e-146| (2) PN ADR Chromaffin: 4.1544723466604e-182| (4) Macrophage: 3.04265679041984e-95| (5) E NOR Chromaffin: 1.26583627840299e-123| (6) E Glia|SCP: 1.14269706886772e-106| (7) Cortex ZG: 2.58484523129627e-97| (8) Cycling TH+: 6.53291753410212e-98| (9) Cortex X Zone: 1.56174903960692e-87| (10) E Neuroblast: 6.226305…	(0) E ADR Chromaffin: 3.5637899493699e-214| (1) PN NOR Chromaffin: 2.26381693864241e-141| (2) PN ADR Chromaffin: 1.58983347762e-177| (4) Macrophage: 1.16436390055787e-90| (5) E NOR Chromaffin: 4.84410227019257e-119| (6) E Glia|SCP: 4.37287314314298e-102| (7) Cortex ZG: 9.89168573112458e-93| (8) Cycling TH+: 2.5000168819502e-93| (9) Cortex X Zone: 5.97650122476775e-83| (10) E Neuroblast: 2.3826826…	(0) E ADR Chromaffin: 8.54110993330513| (1) PN NOR Chromaffin: 5.37809029906601| (2) PN ADR Chromaffin: 8.77553111538125| (4) Macrophage: 4.37905483708616| (5) E NOR Chromaffin: 8.38702229128486| (6) E Glia|SCP: 6.44775432192172| (7) Cortex ZG: 7.55998040110509| (8) Cycling TH+: 7.21545594340285| (9) Cortex X Zone: 7.31659543924953| (10) E Neuroblast: 7.91905570803131| (11) PN Sustentacular: 6.03…	(0) E ADR Chromaffin: 0.025| (1) PN NOR Chromaffin: 0.154| (2) PN ADR Chromaffin: 0.048| (4) Macrophage: 0.23| (5) E NOR Chromaffin: 0.03| (6) E Glia|SCP: 0.032| (7) Cortex ZG: 0.103| (8) Cycling TH+: 0.045| (9) Cortex X Zone: 0.082| (10) E Neuroblast: 0.04| (11) PN Sustentacular: 0.089| (12) Cortex ZF: 0.1| (13) Macrophage: 0.238| (14) Cortex ZG: 0.107| (15) Dendritic cell: 0.162| (16) T cell: 0…
Sema6a	(3) Endothelial	5.69662	8.37746e-15	3.20589e-10	0.825	0.131263	(0) E ADR Chromaffin: 3.33411268818328e-218| (1) PN NOR Chromaffin: 1.7716324629012e-131| (2) PN ADR Chromaffin: 3.90116042729501e-185| (4) Macrophage: 2.54865283282596e-143| (5) E NOR Chromaffin: 1.53118432587747e-111| (6) E Glia|SCP: 1.42544399340095e-47| (7) Cortex ZG: 1.29654332629148e-117| (8) Cycling TH+: 4.81178628738508e-97| (9) Cortex X Zone: 5.26484844596392e-102| (10) E Neuroblast: 9.9…	(0) E ADR Chromaffin: 1.27589824351398e-213| (1) PN NOR Chromaffin: 6.7796831090303e-127| (2) PN ADR Chromaffin: 1.49289607231726e-180| (4) Macrophage: 9.75318466065838e-139| (5) E NOR Chromaffin: 5.85953617826791e-107| (6) E Glia|SCP: 5.45488907394674e-43| (7) Cortex ZG: 4.96161200105224e-113| (8) Cycling TH+: 1.84137437645652e-92| (9) Cortex X Zone: 2.01475220330147e-97| (10) E Neuroblast: 3.79…	(0) E ADR Chromaffin: 6.04864719794294| (1) PN NOR Chromaffin: 3.94214668174436| (2) PN ADR Chromaffin: 6.14881911005401| (4) Macrophage: 7.66047523613012| (5) E NOR Chromaffin: 4.72528659121787| (6) E Glia|SCP: 2.41839413122179| (7) Cortex ZG: 7.50783241365539| (8) Cycling TH+: 5.32688449235531| (9) Cortex X Zone: 7.17782050312038| (10) E Neuroblast: 4.40938389801242| (11) PN Sustentacular: 3.54…	(0) E ADR Chromaffin: 0.068| (1) PN NOR Chromaffin: 0.255| (2) PN ADR Chromaffin: 0.099| (4) Macrophage: 0.095| (5) E NOR Chromaffin: 0.167| (6) E Glia|SCP: 0.476| (7) Cortex ZG: 0.043| (8) Cycling TH+: 0.152| (9) Cortex X Zone: 0.068| (10) E Neuroblast: 0.183| (11) PN Sustentacular: 0.259| (12) Cortex ZF: 0.036| (13) Macrophage: 0.067| (14) Cortex ZG: 0.107| (15) Dendritic cell: 0.051| (16) T ce…
Thrsp	(3) Endothelial	6.4637	1.56395e-14	5.98491e-10	0.818	0.134263	(0) E ADR Chromaffin: 2.35167223291831e-216| (1) PN NOR Chromaffin: 6.69982363211635e-125| (2) PN ADR Chromaffin: 3.54914493317143e-163| (4) Macrophage: 1.25756026558903e-134| (5) E NOR Chromaffin: 4.60057332596388e-124| (6) E Glia|SCP: 2.22290895469912e-116| (7) Cortex ZG: 5.54906941185991e-115| (8) Cycling TH+: 8.27836158053626e-106| (9) Cortex X Zone: 8.24815224376685e-42| (10) E Neuroblast: 3…	(0) E ADR Chromaffin: 8.9993793009318e-212| (1) PN NOR Chromaffin: 2.56388850753828e-120| (2) PN ADR Chromaffin: 1.35818678302604e-158| (4) Macrophage: 4.81243162435611e-130| (5) E NOR Chromaffin: 1.76054740037986e-119| (6) E Glia|SCP: 8.50662798784259e-112| (7) Cortex ZG: 2.12351788253055e-110| (8) Cycling TH+: 3.16796340963962e-101| (9) Cortex X Zone: 3.1564029006447e-37| (10) E Neuroblast: 1.5…	(0) E ADR Chromaffin: 6.56641533620643| (1) PN NOR Chromaffin: 3.86400119455282| (2) PN ADR Chromaffin: 5.08894964251997| (4) Macrophage: 8.85832512718776| (5) E NOR Chromaffin: 5.41755867979502| (6) E Glia|SCP: 6.07110852905862| (7) Cortex ZG: 7.70154982372981| (8) Cycling TH+: 6.34270628869338| (9) Cortex X Zone: 1.9310622232173| (10) E Neuroblast: 6.62241867154248| (11) PN Sustentacular: 7.857…	(0) E ADR Chromaffin: 0.083| (1) PN NOR Chromaffin: 0.365| (2) PN ADR Chromaffin: 0.176| (4) Macrophage: 0.158| (5) E NOR Chromaffin: 0.114| (6) E Glia|SCP: 0.053| (7) Cortex ZG: 0.065| (8) Cycling TH+: 0.091| (9) Cortex X Zone: 0.494| (10) E Neuroblast: 0.072| (11) PN Sustentacular: 0.094| (12) Cortex ZF: 0.227| (13) Macrophage: 0.057| (14) Cortex ZG: 0.068| (15) Dendritic cell: 0.061| (16) T ce…
Cav2	(3) Endothelial	4.78373	4.30563e-12	1.64768e-07	0.793	0.207526	(0) E ADR Chromaffin: 7.07723448044332e-215| (1) PN NOR Chromaffin: 2.71666010251387e-133| (2) PN ADR Chromaffin: 2.54423625190079e-153| (4) Macrophage: 1.7082995317544e-75| (5) E NOR Chromaffin: 6.56376563515409e-129| (6) E Glia|SCP: 1.81400216409297e-86| (7) Cortex ZG: 2.17416779631606e-93| (8) Cycling TH+: 6.52561510454851e-94| (9) Cortex X Zone: 2.67655985218254e-60| (10) E Neuroblast: 2.1254…	(0) E ADR Chromaffin: 2.70831609097605e-210| (1) PN NOR Chromaffin: 1.03961148803001e-128| (2) PN ADR Chromaffin: 9.73628328877393e-149| (4) Macrophage: 6.53732064811772e-71| (5) E NOR Chromaffin: 2.51182183326077e-124| (6) E Glia|SCP: 6.94182348155097e-82| (7) Cortex ZG: 8.32010532294232e-89| (8) Cycling TH+: 2.49722238820862e-89| (9) Cortex X Zone: 1.02426592423321e-55| (10) E Neuroblast: 8.133…	(0) E ADR Chromaffin: 7.28818271432242| (1) PN NOR Chromaffin: 4.60605971664013| (2) PN ADR Chromaffin: 4.81449467553799| (4) Macrophage: 2.98952508829732| (5) E NOR Chromaffin: 7.63723389027189| (6) E Glia|SCP: 4.44703832844339| (7) Cortex ZG: 5.0965402283644| (8) Cycling TH+: 5.83675905178985| (9) Cortex X Zone: 3.96406748391382| (10) E Neuroblast: 6.69044026038013| (11) PN Sustentacular: 3.226…	(0) E ADR Chromaffin: 0.057| (1) PN NOR Chromaffin: 0.241| (2) PN ADR Chromaffin: 0.152| (4) Macrophage: 0.352| (5) E NOR Chromaffin: 0.043| (6) E Glia|SCP: 0.211| (7) Cortex ZG: 0.158| (8) Cycling TH+: 0.126| (9) Cortex X Zone: 0.397| (10) E Neuroblast: 0.064| (11) PN Sustentacular: 0.228| (12) Cortex ZF: 0.136| (13) Macrophage: 0.476| (14) Cortex ZG: 0.282| (15) Dendritic cell: 0.222| (16) T ce…
F2r	(3) Endothelial	4.26861	1.21131e-18	4.63545e-14	0.968	0.532947	(0) E ADR Chromaffin: 2.05285581267084e-213| (1) PN NOR Chromaffin: 5.08852750895716e-142| (2) PN ADR Chromaffin: 1.18717513686874e-177| (4) Macrophage: 2.72365864594543e-183| (5) E NOR Chromaffin: 1.43780875282965e-134| (6) E Glia|SCP: 1.50784954215019e-130| (7) Cortex ZG: 8.02589197055288e-110| (8) Cycling TH+: 3.78788938757799e-115| (9) Cortex X Zone: 1.86763371219047e-97| (10) E Neuroblast: 4…	(0) E ADR Chromaffin: 7.85586862392878e-209| (1) PN NOR Chromaffin: 1.94727770712773e-137| (2) PN ADR Chromaffin: 4.54308181376928e-173| (4) Macrophage: 1.0422896906304e-178| (5) E NOR Chromaffin: 5.50220653532851e-130| (6) E Glia|SCP: 5.77023862790034e-126| (7) Cortex ZG: 3.07134833929118e-105| (8) Cycling TH+: 1.44954951083834e-110| (9) Cortex X Zone: 7.14706068981048e-93| (10) E Neuroblast: 1.…	(0) E ADR Chromaffin: 4.79797066212227| (1) PN NOR Chromaffin: 2.62897426613085| (2) PN ADR Chromaffin: 3.88173417556475| (4) Macrophage: 9.34475013758867| (5) E NOR Chromaffin: 3.76327607724236| (6) E Glia|SCP: 4.3100574848015| (7) Cortex ZG: 3.2666498810661| (8) Cycling TH+: 3.93590084519038| (9) Cortex X Zone: 3.28898826564133| (10) E Neuroblast: 4.61862072984743| (11) PN Sustentacular: 5.0070…	(0) E ADR Chromaffin: 0.451| (1) PN NOR Chromaffin: 0.73| (2) PN ADR Chromaffin: 0.599| (4) Macrophage: 0.244| (5) E NOR Chromaffin: 0.569| (6) E Glia|SCP: 0.444| (7) Cortex ZG: 0.717| (8) Cycling TH+: 0.604| (9) Cortex X Zone: 0.829| (10) E Neuroblast: 0.378| (11) PN Sustentacular: 0.286| (12) Cortex ZF: 0.955| (13) Macrophage: 0.257| (14) Cortex ZG: 0.961| (15) Dendritic cell: 0.131| (16) T cel…
Lmo2	(3) Endothelial	5.9361	7.83126e-10	2.99686e-05	0.741	0.168263	(0) E ADR Chromaffin: 2.07897414359189e-213| (1) PN NOR Chromaffin: 4.83735951567879e-138| (2) PN ADR Chromaffin: 2.79611502824308e-179| (4) Macrophage: 1.96152841735407e-49| (5) E NOR Chromaffin: 1.1583269551633e-119| (6) E Glia|SCP: 1.93034656966774e-103| (7) Cortex ZG: 7.41262166115092e-69| (8) Cycling TH+: 1.44449160331694e-97| (9) Cortex X Zone: 5.99589526151693e-75| (10) E Neuroblast: 1.308…	(0) E ADR Chromaffin: 7.95581825269743e-209| (1) PN NOR Chromaffin: 1.85116073945996e-133| (2) PN ADR Chromaffin: 1.07001729900806e-174| (4) Macrophage: 7.50637694753057e-45| (5) E NOR Chromaffin: 4.43268559201892e-115| (6) E Glia|SCP: 7.38705025280449e-99| (7) Cortex ZG: 2.83666205728923e-64| (8) Cycling TH+: 5.52778046757327e-93| (9) Cortex X Zone: 2.2945091986773e-70| (10) E Neuroblast: 5.0069…	(0) E ADR Chromaffin: 9.23330135218684| (1) PN NOR Chromaffin: 4.05434008294653| (2) PN ADR Chromaffin: 7.46094627650279| (4) Macrophage: 2.79693174898072| (5) E NOR Chromaffin: 8.33805547595263| (6) E Glia|SCP: 7.81275157785289| (7) Cortex ZG: 3.72013056479449| (8) Cycling TH+: 8.32278248535548| (9) Cortex X Zone: 5.80938984512756| (10) E Neuroblast: 7.73148182775876| (11) PN Sustentacular: 7.92…	(0) E ADR Chromaffin: 0.018| (1) PN NOR Chromaffin: 0.12| (2) PN ADR Chromaffin: 0.031| (4) Macrophage: 0.478| (5) E NOR Chromaffin: 0.02| (6) E Glia|SCP: 0.027| (7) Cortex ZG: 0.221| (8) Cycling TH+: 0.016| (9) Cortex X Zone: 0.147| (10) E Neuroblast: 0.036| (11) PN Sustentacular: 0.027| (12) Cortex ZF: 0.082| (13) Macrophage: 0.419| (14) Cortex ZG: 0.583| (15) Dendritic cell: 0.485| (16) T cell…
Lrg1	(3) Endothelial	7.98288	4.17507e-13	1.59772e-08	0.761	0.0481579	(0) E ADR Chromaffin: 7.75312770968901e-213| (1) PN NOR Chromaffin: 2.16473200463981e-188| (2) PN ADR Chromaffin: 1.87709614738704e-181| (4) Macrophage: 9.73043887772e-121| (5) E NOR Chromaffin: 1.05747782766863e-125| (6) E Glia|SCP: 1.42557501922596e-108| (7) Cortex ZG: 1.92784815994491e-104| (8) Cycling TH+: 3.87416773672791e-101| (9) Cortex X Zone: 7.63967550985744e-96| (10) E Neuroblast: 1.01…	(0) E ADR Chromaffin: 2.96696691194379e-208| (1) PN NOR Chromaffin: 8.28399643535564e-184| (2) PN ADR Chromaffin: 7.18327153682071e-177| (4) Macrophage: 3.72364434972589e-116| (5) E NOR Chromaffin: 4.04675615092231e-121| (6) E Glia|SCP: 5.45539048357389e-104| (7) Cortex ZG: 7.37748933847718e-100| (8) Cycling TH+: 1.48256650949104e-96| (9) Cortex X Zone: 2.92355102411224e-91| (10) E Neuroblast: 3.…	(0) E ADR Chromaffin: 8.30372767729448| (1) PN NOR Chromaffin: 8.50573808011309| (2) PN ADR Chromaffin: 7.79473072660922| (4) Macrophage: 8.71839953573419| (5) E NOR Chromaffin: 8.81206373320131| (6) E Glia|SCP: 7.93206703015528| (7) Cortex ZG: 8.38517802506733| (8) Cycling TH+: 8.38321378634918| (9) Cortex X Zone: 9.39821577400506| (10) E Neuroblast: 8.70256861927017| (11) PN Sustentacular: 7.49…	(0) E ADR Chromaffin: 0.036| (1) PN NOR Chromaffin: 0.034| (2) PN ADR Chromaffin: 0.045| (4) Macrophage: 0.126| (5) E NOR Chromaffin: 0.016| (6) E Glia|SCP: 0.022| (7) Cortex ZG: 0.038| (8) Cycling TH+: 0.021| (9) Cortex X Zone: 0.006| (10) E Neuroblast: 0.016| (11) PN Sustentacular: 0.058| (12) Cortex ZF: 0.1| (13) Macrophage: 0.048| (14) Cortex ZG: 0| (15) Dendritic cell: 0.071| (16) T cell: 0.…
Gpr182	(3) Endothelial	7.79642	7.14291e-13	2.73345e-08	0.766	0.0704737	(0) E ADR Chromaffin: 1.51843953114741e-212| (1) PN NOR Chromaffin: 4.75155885710702e-185| (2) PN ADR Chromaffin: 5.37502343152117e-191| (4) Macrophage: 1.28577021760114e-116| (5) E NOR Chromaffin: 1.81749939414431e-122| (6) E Glia|SCP: 4.8793803217575e-107| (7) Cortex ZG: 2.1718824938272e-105| (8) Cycling TH+: 1.10438481329389e-99| (9) Cortex X Zone: 2.64813960916176e-94| (10) E Neuroblast: 1.82…	(0) E ADR Chromaffin: 5.81076439779489e-208| (1) PN NOR Chromaffin: 1.81832654343771e-180| (2) PN ADR Chromaffin: 2.05691396677452e-186| (4) Macrophage: 4.92038546871602e-112| (5) E NOR Chromaffin: 6.95520668151145e-118| (6) E Glia|SCP: 1.86724126153016e-102| (7) Cortex ZG: 8.31135992737792e-101| (8) Cycling TH+: 4.22625980351305e-95| (9) Cortex X Zone: 1.01339006563402e-89| (10) E Neuroblast: 6.…	(0) E ADR Chromaffin: 7.80121156327317| (1) PN NOR Chromaffin: 8.37291851664033| (2) PN ADR Chromaffin: 9.1364030019461| (4) Macrophage: 8.48922512393906| (5) E NOR Chromaffin: 7.63842765887307| (6) E Glia|SCP: 7.10580250777378| (7) Cortex ZG: 8.86832877212303| (8) Cycling TH+: 7.68939707835299| (9) Cortex X Zone: 9.04209403550834| (10) E Neuroblast: 8.01861942556548| (11) PN Sustentacular: 7.288…	(0) E ADR Chromaffin: 0.04| (1) PN NOR Chromaffin: 0.05| (2) PN ADR Chromaffin: 0.027| (4) Macrophage: 0.165| (5) E NOR Chromaffin: 0.043| (6) E Glia|SCP: 0.041| (7) Cortex ZG: 0.043| (8) Cycling TH+: 0.043| (9) Cortex X Zone: 0.032| (10) E Neuroblast: 0.044| (11) PN Sustentacular: 0.058| (12) Cortex ZF: 0.055| (13) Macrophage: 0.048| (14) Cortex ZG: 0.01| (15) Dendritic cell: 0.101| (16) T cell:…
Kank3	(3) Endothelial	4.65338	3.46818e-17	1.3272e-12	0.926	0.296	(0) E ADR Chromaffin: 9.71345853704882e-212| (1) PN NOR Chromaffin: 9.24138948531926e-208| (2) PN ADR Chromaffin: 8.09814120982771e-218| (4) Macrophage: 9.33046438286704e-152| (5) E NOR Chromaffin: 2.01178220382326e-136| (6) E Glia|SCP: 2.87033736233169e-126| (7) Cortex ZG: 9.28622749904047e-63| (8) Cycling TH+: 9.54851084609906e-102| (9) Cortex X Zone: 3.33179155810716e-84| (10) E Neuroblast: 3.…	(0) E ADR Chromaffin: 3.71714631295784e-207| (1) PN NOR Chromaffin: 3.53649492824197e-203| (2) PN ADR Chromaffin: 3.09899667817687e-213| (4) Macrophage: 3.57058211003556e-147| (5) E NOR Chromaffin: 7.69868813759086e-132| (6) E Glia|SCP: 1.09842070181709e-121| (7) Cortex ZG: 3.55365353933281e-58| (8) Cycling TH+: 3.65402413058519e-97| (9) Cortex X Zone: 1.27500999345645e-79| (10) E Neuroblast: 1.4…	(0) E ADR Chromaffin: 4.83202651323693| (1) PN NOR Chromaffin: 5.4204488582808| (2) PN ADR Chromaffin: 5.94558715230627| (4) Macrophage: 4.92998919072392| (5) E NOR Chromaffin: 4.63695496035589| (6) E Glia|SCP: 4.71055465740641| (7) Cortex ZG: 2.14951266041693| (8) Cycling TH+: 3.99242829033558| (9) Cortex X Zone: 3.39717267791145| (10) E Neuroblast: 4.05959818899248| (11) PN Sustentacular: 4.527…	(0) E ADR Chromaffin: 0.238| (1) PN NOR Chromaffin: 0.188| (2) PN ADR Chromaffin: 0.142| (4) Macrophage: 0.257| (5) E NOR Chromaffin: 0.254| (6) E Glia|SCP: 0.197| (7) Cortex ZG: 0.647| (8) Cycling TH+: 0.401| (9) Cortex X Zone: 0.529| (10) E Neuroblast: 0.319| (11) PN Sustentacular: 0.179| (12) Cortex ZF: 0.491| (13) Macrophage: 0.229| (14) Cortex ZG: 0.612| (15) Dendritic cell: 0.121| (16) T ce…
Gng11	(3) Endothelial	5.37626	6.51083e-16	2.49157e-11	0.931	0.230368	(0) E ADR Chromaffin: 1.65193195795346e-211| (1) PN NOR Chromaffin: 1.08179526477613e-221| (2) PN ADR Chromaffin: 9.07197795800979e-174| (4) Macrophage: 1.09551396415645e-176| (5) E NOR Chromaffin: 7.5872654021315e-124| (6) E Glia|SCP: 9.52349352654685e-48| (7) Cortex ZG: 3.08325782758443e-145| (8) Cycling TH+: 2.82487724246193e-121| (9) Cortex X Zone: 4.08183786189437e-123| (10) E Neuroblast: 2.…	(0) E ADR Chromaffin: 6.3216132166963e-207| (1) PN NOR Chromaffin: 4.13981411924529e-217| (2) PN ADR Chromaffin: 3.47166452497119e-169| (4) Macrophage: 4.19231283803391e-172| (5) E NOR Chromaffin: 2.90349472408768e-119| (6) E Glia|SCP: 3.64445050273895e-43| (7) Cortex ZG: 1.17990110546001e-140| (8) Cycling TH+: 1.08102402314533e-116| (9) Cortex X Zone: 1.56203771298974e-118| (10) E Neuroblast: 1.…	(0) E ADR Chromaffin: 4.45531671197879| (1) PN NOR Chromaffin: 5.54499364975042| (2) PN ADR Chromaffin: 3.77461470139656| (4) Macrophage: 7.50712606109714| (5) E NOR Chromaffin: 3.52869418427947| (6) E Glia|SCP: 1.6215131893867| (7) Cortex ZG: 8.08046088567404| (8) Cycling TH+: 4.71203130922224| (9) Cortex X Zone: 5.95221547764666| (10) E Neuroblast: 5.74003929722347| (11) PN Sustentacular: 2.097…	(0) E ADR Chromaffin: 0.282| (1) PN NOR Chromaffin: 0.158| (2) PN ADR Chromaffin: 0.358| (4) Macrophage: 0.126| (5) E NOR Chromaffin: 0.376| (6) E Glia|SCP: 0.743| (7) Cortex ZG: 0.065| (8) Cycling TH+: 0.273| (9) Cortex X Zone: 0.156| (10) E Neuroblast: 0.127| (11) PN Sustentacular: 0.607| (12) Cortex ZF: 0.045| (13) Macrophage: 0.076| (14) Cortex ZG: 0.087| (15) Dendritic cell: 0.091| (16) T ce…
Sptbn1	(3) Endothelial	2.61457	1.19608e-13	4.57715e-09	0.998	0.867526	(0) E ADR Chromaffin: 3.20841117309441e-211| (1) PN NOR Chromaffin: 7.11225362105197e-166| (2) PN ADR Chromaffin: 2.46337743178511e-190| (4) Macrophage: 7.61619450600757e-183| (5) E NOR Chromaffin: 2.22488574791375e-143| (6) E Glia|SCP: 3.21500445801082e-61| (7) Cortex ZG: 3.17956442146969e-128| (8) Cycling TH+: 1.32754270245594e-117| (9) Cortex X Zone: 3.73115242425745e-107| (10) E Neuroblast: 7…	(0) E ADR Chromaffin: 1.22779478771977e-206| (1) PN NOR Chromaffin: 2.72171721570417e-161| (2) PN ADR Chromaffin: 9.42685275595524e-186| (4) Macrophage: 2.91456531355898e-178| (5) E NOR Chromaffin: 8.51419278011635e-139| (6) E Glia|SCP: 1.23031790599158e-56| (7) Cortex ZG: 1.21675571280802e-123| (8) Cycling TH+: 5.0802404137584e-113| (9) Cortex X Zone: 1.42783740971484e-102| (10) E Neuroblast: 3.…	(0) E ADR Chromaffin: 2.89548085993594| (1) PN NOR Chromaffin: 2.08877408075259| (2) PN ADR Chromaffin: 2.77099509508364| (4) Macrophage: 4.84266077731105| (5) E NOR Chromaffin: 2.6272441166935| (6) E Glia|SCP: 1.13686093084808| (7) Cortex ZG: 2.67633885986773| (8) Cycling TH+: 2.39106944004871| (9) Cortex X Zone: 2.21428720156717| (10) E Neuroblast: 2.26792093017902| (11) PN Sustentacular: 0.590…	(0) E ADR Chromaffin: 0.942| (1) PN NOR Chromaffin: 0.991| (2) PN ADR Chromaffin: 0.941| (4) Macrophage: 0.573| (5) E NOR Chromaffin: 0.947| (6) E Glia|SCP: 0.988| (7) Cortex ZG: 0.917| (8) Cycling TH+: 0.971| (9) Cortex X Zone: 0.994| (10) E Neuroblast: 0.952| (11) PN Sustentacular: 0.991| (12) Cortex ZF: 0.955| (13) Macrophage: 0.648| (14) Cortex ZG: 0.951| (15) Dendritic cell: 0.657| (16) T ce…
S100a13	(3) Endothelial	2.79013	3.45091e-12	1.32059e-07	0.902	0.483158	(0) E ADR Chromaffin: 6.57562772213325e-209| (1) PN NOR Chromaffin: 6.79155829365194e-35| (2) PN ADR Chromaffin: 5.06122565134278e-82| (4) Macrophage: 8.77576126638783e-94| (5) E NOR Chromaffin: 8.41179954609801e-107| (6) E Glia|SCP: 1.80395468611314e-50| (7) Cortex ZG: 2.24488558102823e-115| (8) Cycling TH+: 1.65992671228205e-103| (9) Cortex X Zone: 2.93259081269784e-48| (10) E Neuroblast: 1.028…	(0) E ADR Chromaffin: 2.51636121670595e-204| (1) PN NOR Chromaffin: 2.59899352781472e-30| (2) PN ADR Chromaffin: 1.93682983225585e-77| (4) Macrophage: 3.3583083214213e-89| (5) E NOR Chromaffin: 3.21902745030079e-102| (6) E Glia|SCP: 6.90337379281778e-46| (7) Cortex ZG: 8.59072814147885e-111| (8) Cycling TH+: 6.35220754256094e-99| (9) Cortex X Zone: 1.12224385220321e-43| (10) E Neuroblast: 3.93726…	(0) E ADR Chromaffin: 4.60033735371277| (1) PN NOR Chromaffin: 1.34178899155556| (2) PN ADR Chromaffin: 2.15563130952827| (4) Macrophage: 2.86032675140531| (5) E NOR Chromaffin: 3.45232870098743| (6) E Glia|SCP: 1.90408873304342| (7) Cortex ZG: 4.60533359563894| (8) Cycling TH+: 3.9056114614257| (9) Cortex X Zone: 2.17528371830578| (10) E Neuroblast: 4.92341654745192| (11) PN Sustentacular: 1.719…	(0) E ADR Chromaffin: 0.183| (1) PN NOR Chromaffin: 0.823| (2) PN ADR Chromaffin: 0.593| (4) Macrophage: 0.515| (5) E NOR Chromaffin: 0.333| (6) E Glia|SCP: 0.544| (7) Cortex ZG: 0.216| (8) Cycling TH+: 0.217| (9) Cortex X Zone: 0.665| (10) E Neuroblast: 0.1| (11) PN Sustentacular: 0.54| (12) Cortex ZF: 0.655| (13) Macrophage: 0.781| (14) Cortex ZG: 0.369| (15) Dendritic cell: 0.475| (16) T cell:…
Epas1	(3) Endothelial	4.56229	4.29034e-16	1.64183e-11	0.987	0.438263	(0) E ADR Chromaffin: 1.56688899317155e-206| (1) PN NOR Chromaffin: 3.10398466302258e-94| (2) PN ADR Chromaffin: 2.65775293306386e-187| (4) Macrophage: 4.19690831219221e-187| (5) E NOR Chromaffin: 4.07826644066364e-69| (6) E Glia|SCP: 2.87943182033242e-158| (7) Cortex ZG: 2.56232223448456e-135| (8) Cycling TH+: 1.62014406332658e-126| (9) Cortex X Zone: 1.66837562661592e-128| (10) E Neuroblast: 1.…	(0) E ADR Chromaffin: 5.99617079906888e-202| (1) PN NOR Chromaffin: 1.18783285084548e-89| (2) PN ADR Chromaffin: 1.01706889242488e-182| (4) Macrophage: 1.60607287290972e-182| (5) E NOR Chromaffin: 1.56067100151316e-64| (6) E Glia|SCP: 1.10190096900481e-153| (7) Cortex ZG: 9.80549472692552e-131| (8) Cycling TH+: 6.19996730153815e-122| (9) Cortex X Zone: 6.38453984793379e-124| (10) E Neuroblast: 5.…	(0) E ADR Chromaffin: 3.59544696306797| (1) PN NOR Chromaffin: 1.5705169378865| (2) PN ADR Chromaffin: 3.34020608728222| (4) Macrophage: 6.59571782264024| (5) E NOR Chromaffin: 1.52323530831652| (6) E Glia|SCP: 6.2911706962821| (7) Cortex ZG: 4.07234045529105| (8) Cycling TH+: 3.78151319406022| (9) Cortex X Zone: 4.84198102984966| (10) E Neuroblast: 3.84748903699963| (11) PN Sustentacular: 4.4178…	(0) E ADR Chromaffin: 0.546| (1) PN NOR Chromaffin: 0.916| (2) PN ADR Chromaffin: 0.565| (4) Macrophage: 0.287| (5) E NOR Chromaffin: 0.774| (6) E Glia|SCP: 0.172| (7) Cortex ZG: 0.544| (8) Cycling TH+: 0.471| (9) Cortex X Zone: 0.485| (10) E Neuroblast: 0.39| (11) PN Sustentacular: 0.42| (12) Cortex ZF: 0.609| (13) Macrophage: 0.333| (14) Cortex ZG: 0.359| (15) Dendritic cell: 0.172| (16) T cell…
Ehd3	(3) Endothelial	6.62674	6.67499e-18	2.55439e-13	0.931	0.292368	(0) E ADR Chromaffin: 1.61555990293868e-205| (1) PN NOR Chromaffin: 6.4057404193528e-171| (2) PN ADR Chromaffin: 3.94429916104534e-189| (4) Macrophage: 4.84069585818432e-158| (5) E NOR Chromaffin: 3.51125113521287e-134| (6) E Glia|SCP: 9.89211381836043e-116| (7) Cortex ZG: 4.83990238802163e-137| (8) Cycling TH+: 7.92813871765103e-119| (9) Cortex X Zone: 4.40464777304632e-128| (10) E Neuroblast: 1…	(0) E ADR Chromaffin: 6.18242463656576e-201| (1) PN NOR Chromaffin: 2.45134874367793e-166| (2) PN ADR Chromaffin: 1.50940440294883e-184| (4) Macrophage: 1.85243749100997e-153| (5) E NOR Chromaffin: 1.34368558442326e-129| (6) E Glia|SCP: 3.78551411601017e-111| (7) Cortex ZG: 1.85213384584812e-132| (8) Cycling TH+: 3.0339401244707e-114| (9) Cortex X Zone: 1.68557060978936e-123| (10) E Neuroblast: 3…	(0) E ADR Chromaffin: 6.12030257504627| (1) PN NOR Chromaffin: 5.40379148393441| (2) PN ADR Chromaffin: 6.17088118488617| (4) Macrophage: 8.82148219743501| (5) E NOR Chromaffin: 5.63617565660999| (6) E Glia|SCP: 4.89129023596637| (7) Cortex ZG: 8.25642450366044| (8) Cycling TH+: 6.1828093745008| (9) Cortex X Zone: 8.87142476556676| (10) E Neuroblast: 6.32092474275742| (11) PN Sustentacular: 4.676…	(0) E ADR Chromaffin: 0.34| (1) PN NOR Chromaffin: 0.47| (2) PN ADR Chromaffin: 0.334| (4) Macrophage: 0.355| (5) E NOR Chromaffin: 0.382| (6) E Glia|SCP: 0.422| (7) Cortex ZG: 0.19| (8) Cycling TH+: 0.318| (9) Cortex X Zone: 0.079| (10) E Neuroblast: 0.271| (11) PN Sustentacular: 0.433| (12) Cortex ZF: 0.327| (13) Macrophage: 0.143| (14) Cortex ZG: 0.126| (15) Dendritic cell: 0.172| (16) T cell:…
Btnl9	(3) Endothelial	8.13747	9.4627e-12	3.62119e-07	0.722	0.0695789	(0) E ADR Chromaffin: 2.80867379726164e-205| (1) PN NOR Chromaffin: 5.08834554859178e-170| (2) PN ADR Chromaffin: 1.78368132321413e-168| (4) Macrophage: 1.66505859162685e-112| (5) E NOR Chromaffin: 1.18713324350167e-114| (6) E Glia|SCP: 3.91890923486888e-98| (7) Cortex ZG: 7.64815704207547e-88| (8) Cycling TH+: 4.75179424748636e-92| (9) Cortex X Zone: 8.32766952698558e-87| (10) E Neuroblast: 2.97…	(0) E ADR Chromaffin: 1.07482328873608e-200| (1) PN NOR Chromaffin: 1.9472080745351e-165| (2) PN ADR Chromaffin: 6.82579168767582e-164| (4) Macrophage: 6.37184621843764e-108| (5) E NOR Chromaffin: 4.54292149623219e-110| (6) E Glia|SCP: 1.49968818599962e-93| (7) Cortex ZG: 2.92679673686144e-83| (8) Cycling TH+: 1.81841662262808e-87| (9) Cortex X Zone: 3.18683257458684e-82| (10) E Neuroblast: 1.138…	(0) E ADR Chromaffin: 9.24555499170507| (1) PN NOR Chromaffin: 9.06771453152236| (2) PN ADR Chromaffin: 9.2199927518105| (4) Macrophage: 9.94854768636983| (5) E NOR Chromaffin: 8.61927938149662| (6) E Glia|SCP: 7.57088965104072| (7) Cortex ZG: 8.2232583839589| (8) Cycling TH+: 8.0287419587044| (9) Cortex X Zone: 9.19785796407082| (10) E Neuroblast: 8.74885589207554| (11) PN Sustentacular: 6.76689…	(0) E ADR Chromaffin: 0.02| (1) PN NOR Chromaffin: 0.047| (2) PN ADR Chromaffin: 0.045| (4) Macrophage: 0.104| (5) E NOR Chromaffin: 0.024| (6) E Glia|SCP: 0.034| (7) Cortex ZG: 0.11| (8) Cycling TH+: 0.029| (9) Cortex X Zone: 0.021| (10) E Neuroblast: 0.02| (11) PN Sustentacular: 0.085| (12) Cortex ZF: 0.109| (13) Macrophage: 0.086| (14) Cortex ZG: 0.097| (15) Dendritic cell: 0.081| (16) T cell:…
Ptprg	(3) Endothelial	4.95803	3.74654e-14	1.43373e-09	0.879	0.301	(0) E ADR Chromaffin: 1.62336220325979e-204| (1) PN NOR Chromaffin: 8.03872171498794e-203| (2) PN ADR Chromaffin: 9.98180284509022e-186| (4) Macrophage: 7.81700805877015e-142| (5) E NOR Chromaffin: 4.71170590889077e-125| (6) E Glia|SCP: 6.30108524496871e-92| (7) Cortex ZG: 4.49573777652064e-74| (8) Cycling TH+: 1.08443472637115e-102| (9) Cortex X Zone: 5.21854106847595e-62| (10) E Neuroblast: 3.1…	(0) E ADR Chromaffin: 6.21228247943456e-200| (1) PN NOR Chromaffin: 3.07625802589159e-198| (2) PN ADR Chromaffin: 3.81983631275912e-181| (4) Macrophage: 2.99141264393016e-137| (5) E NOR Chromaffin: 1.80307561721432e-120| (6) E Glia|SCP: 2.41129930154463e-87| (7) Cortex ZG: 1.72042893231892e-69| (8) Cycling TH+: 4.14991481087711e-98| (9) Cortex X Zone: 1.99703129608438e-57| (10) E Neuroblast: 1.20…	(0) E ADR Chromaffin: 5.80271491970159| (1) PN NOR Chromaffin: 6.86900132534852| (2) PN ADR Chromaffin: 5.93084738149538| (4) Macrophage: 7.09669611914592| (5) E NOR Chromaffin: 4.90961752559572| (6) E Glia|SCP: 4.20225660888097| (7) Cortex ZG: 3.25841993731597| (8) Cycling TH+: 5.02323031865307| (9) Cortex X Zone: 3.38729563368089| (10) E Neuroblast: 5.28981260794906| (11) PN Sustentacular: 3.55…	(0) E ADR Chromaffin: 0.178| (1) PN NOR Chromaffin: 0.127| (2) PN ADR Chromaffin: 0.174| (4) Macrophage: 0.235| (5) E NOR Chromaffin: 0.169| (6) E Glia|SCP: 0.342| (7) Cortex ZG: 0.388| (8) Cycling TH+: 0.198| (9) Cortex X Zone: 0.468| (10) E Neuroblast: 0.203| (11) PN Sustentacular: 0.393| (12) Cortex ZF: 0.491| (13) Macrophage: 0.19| (14) Cortex ZG: 0.485| (15) Dendritic cell: 0.242| (16) T cel…
Tcn2	(3) Endothelial	3.31982	2.60266e-14	9.95984e-10	0.98	0.675421	(0) E ADR Chromaffin: 2.98430325787139e-204| (1) PN NOR Chromaffin: 4.56265822579651e-197| (2) PN ADR Chromaffin: 4.75685189676279e-187| (4) Macrophage: 1.48613504426298e-108| (5) E NOR Chromaffin: 5.82620645733997e-150| (6) E Glia|SCP: 1.05858526670595e-86| (7) Cortex ZG: 2.19589632865228e-102| (8) Cycling TH+: 9.56035949082103e-138| (9) Cortex X Zone: 6.85954178161572e-103| (10) E Neuroblast: 2…	(0) E ADR Chromaffin: 1.14203317072222e-199| (1) PN NOR Chromaffin: 1.74603804984781e-192| (2) PN ADR Chromaffin: 1.82035208385318e-182| (4) Macrophage: 5.68714158738559e-104| (5) E NOR Chromaffin: 2.22957268709486e-145| (6) E Glia|SCP: 4.05099409863034e-82| (7) Cortex ZG: 8.40325607048654e-98| (8) Cycling TH+: 3.65855836994739e-133| (9) Cortex X Zone: 2.6250094489887e-98| (10) E Neuroblast: 8.23…	(0) E ADR Chromaffin: 3.81526170877056| (1) PN NOR Chromaffin: 4.11475144199848| (2) PN ADR Chromaffin: 3.67787975631806| (4) Macrophage: 2.21365159274287| (5) E NOR Chromaffin: 4.07356013741398| (6) E Glia|SCP: 1.99146624506674| (7) Cortex ZG: 2.49649537350623| (8) Cycling TH+: 5.12667878948496| (9) Cortex X Zone: 2.91078693255272| (10) E Neuroblast: 4.39692560050281| (11) PN Sustentacular: 1.89…	(0) E ADR Chromaffin: 0.663| (1) PN NOR Chromaffin: 0.608| (2) PN ADR Chromaffin: 0.667| (4) Macrophage: 0.858| (5) E NOR Chromaffin: 0.543| (6) E Glia|SCP: 0.871| (7) Cortex ZG: 0.865| (8) Cycling TH+: 0.34| (9) Cortex X Zone: 0.885| (10) E Neuroblast: 0.438| (11) PN Sustentacular: 0.826| (12) Cortex ZF: 0.927| (13) Macrophage: 0.99| (14) Cortex ZG: 0.951| (15) Dendritic cell: 0.586| (16) T cell…
Plxnd1	(3) Endothelial	3.66387	2.22799e-17	8.52608e-13	0.961	0.524158	(0) E ADR Chromaffin: 2.19937508680612e-199| (1) PN NOR Chromaffin: 2.10998807957625e-146| (2) PN ADR Chromaffin: 2.39097953428095e-196| (4) Macrophage: 2.82669071689471e-147| (5) E NOR Chromaffin: 1.25950271012882e-83| (6) E Glia|SCP: 1.2480399991789e-88| (7) Cortex ZG: 1.18684199533525e-90| (8) Cycling TH+: 2.55700059584346e-115| (9) Cortex X Zone: 3.75419113996829e-116| (10) E Neuroblast: 1.47…	(0) E ADR Chromaffin: 8.41656858218965e-195| (1) PN NOR Chromaffin: 8.07450238292241e-142| (2) PN ADR Chromaffin: 9.14980048178633e-192| (4) Macrophage: 1.08171800354127e-142| (5) E NOR Chromaffin: 4.81986497112097e-79| (6) E Glia|SCP: 4.77599946885783e-84| (7) Cortex ZG: 4.54180694774895e-86| (8) Cycling TH+: 9.78512988017374e-111| (9) Cortex X Zone: 1.43665386544307e-111| (10) E Neuroblast: 5.6…	(0) E ADR Chromaffin: 4.09466109358284| (1) PN NOR Chromaffin: 3.0142311298009| (2) PN ADR Chromaffin: 4.64935732057452| (4) Macrophage: 3.90944860676755| (5) E NOR Chromaffin: 2.1741338660433| (6) E Glia|SCP: 2.53188768124905| (7) Cortex ZG: 2.58714903780897| (8) Cycling TH+: 3.8727254842546| (9) Cortex X Zone: 4.60620344918481| (10) E Neuroblast: 4.22578773292334| (11) PN Sustentacular: 2.04121…	(0) E ADR Chromaffin: 0.458| (1) PN NOR Chromaffin: 0.743| (2) PN ADR Chromaffin: 0.398| (4) Macrophage: 0.438| (5) E NOR Chromaffin: 0.819| (6) E Glia|SCP: 0.743| (7) Cortex ZG: 0.714| (8) Cycling TH+: 0.444| (9) Cortex X Zone: 0.424| (10) E Neuroblast: 0.386| (11) PN Sustentacular: 0.679| (12) Cortex ZF: 0.573| (13) Macrophage: 0.79| (14) Cortex ZG: 0.767| (15) Dendritic cell: 0.566| (16) T cel…
Jam2	(3) Endothelial	6.93072	3.78498e-12	1.44844e-07	0.739	0.111526	(0) E ADR Chromaffin: 2.98965425959196e-197| (1) PN NOR Chromaffin: 3.28685785524752e-172| (2) PN ADR Chromaffin: 8.06113438663296e-169| (4) Macrophage: 9.54287094517994e-110| (5) E NOR Chromaffin: 1.55564838683586e-113| (6) E Glia|SCP: 2.0401932246688e-68| (7) Cortex ZG: 3.34236537961328e-53| (8) Cycling TH+: 2.84729197813222e-87| (9) Cortex X Zone: 1.61068377858856e-86| (10) E Neuroblast: 1.064…	(0) E ADR Chromaffin: 1.14408089206065e-192| (1) PN NOR Chromaffin: 1.25781476404612e-167| (2) PN ADR Chromaffin: 3.0848349070767e-164| (4) Macrophage: 3.65186585330146e-105| (5) E NOR Chromaffin: 5.95315524674348e-109| (6) E Glia|SCP: 7.80741143216256e-64| (7) Cortex ZG: 1.27905638347041e-48| (8) Cycling TH+: 1.08960169419164e-82| (9) Cortex X Zone: 6.16376468390269e-82| (10) E Neuroblast: 4.072…	(0) E ADR Chromaffin: 8.09291310052538| (1) PN NOR Chromaffin: 8.52982551509985| (2) PN ADR Chromaffin: 6.56217784277067| (4) Macrophage: 8.92050665789452| (5) E NOR Chromaffin: 7.3906399049811| (6) E Glia|SCP: 4.42781582318437| (7) Cortex ZG: 3.87836406854644| (8) Cycling TH+: 7.20882272881316| (9) Cortex X Zone: 8.56609218113252| (10) E Neuroblast: 8.8043221670696| (11) PN Sustentacular: 4.4095…	(0) E ADR Chromaffin: 0.046| (1) PN NOR Chromaffin: 0.054| (2) PN ADR Chromaffin: 0.055| (4) Macrophage: 0.147| (5) E NOR Chromaffin: 0.045| (6) E Glia|SCP: 0.233| (7) Cortex ZG: 0.356| (8) Cycling TH+: 0.086| (9) Cortex X Zone: 0.047| (10) E Neuroblast: 0.032| (11) PN Sustentacular: 0.241| (12) Cortex ZF: 0.091| (13) Macrophage: 0.029| (14) Cortex ZG: 0.068| (15) Dendritic cell: 0.172| (16) T ce…
She	(3) Endothelial	6.7893	3.35878e-12	1.28534e-07	0.705	0.0414211	(0) E ADR Chromaffin: 5.83465723459812e-197| (1) PN NOR Chromaffin: 5.56814465668399e-166| (2) PN ADR Chromaffin: 1.66538666302033e-160| (4) Macrophage: 1.15527570935781e-107| (5) E NOR Chromaffin: 5.1612126421702e-110| (6) E Glia|SCP: 2.35965274922385e-97| (7) Cortex ZG: 7.62049803527515e-94| (8) Cycling TH+: 1.77499303923134e-88| (9) Cortex X Zone: 7.65818441501166e-85| (10) E Neuroblast: 1.612…	(0) E ADR Chromaffin: 2.23280663053601e-192| (1) PN NOR Chromaffin: 2.13081759721983e-161| (2) PN ADR Chromaffin: 6.37310168204622e-156| (4) Macrophage: 4.42100908457048e-103| (5) E NOR Chromaffin: 1.97509285390569e-105| (6) E Glia|SCP: 9.02991914072981e-93| (7) Cortex ZG: 2.91621218813909e-89| (8) Cycling TH+: 6.79254336253049e-84| (9) Cortex X Zone: 2.93063401193666e-80| (10) E Neuroblast: 6.17…	(0) E ADR Chromaffin: 7.75975373956364| (1) PN NOR Chromaffin: 7.38921391434589| (2) PN ADR Chromaffin: 6.60011184721104| (4) Macrophage: 6.25001240652197| (5) E NOR Chromaffin: 7.41058177423229| (6) E Glia|SCP: 7.10550721608166| (7) Cortex ZG: 8.64025100169243| (8) Cycling TH+: 7.00947666106524| (9) Cortex X Zone: 8.5037017743614| (10) E Neuroblast: 7.64626533117866| (11) PN Sustentacular: 3.960…	(0) E ADR Chromaffin: 0.02| (1) PN NOR Chromaffin: 0.038| (2) PN ADR Chromaffin: 0.042| (4) Macrophage: 0.093| (5) E NOR Chromaffin: 0.022| (6) E Glia|SCP: 0.012| (7) Cortex ZG: 0.028| (8) Cycling TH+: 0.024| (9) Cortex X Zone: 0.009| (10) E Neuroblast: 0.008| (11) PN Sustentacular: 0.129| (12) Cortex ZF: 0.055| (13) Macrophage: 0.076| (14) Cortex ZG: 0.029| (15) Dendritic cell: 0.051| (16) T cel…
Hecw2	(3) Endothelial	6.16277	4.86523e-11	1.86183e-06	0.741	0.0884211	(0) E ADR Chromaffin: 7.28582587619956e-197| (1) PN NOR Chromaffin: 8.97337870088392e-168| (2) PN ADR Chromaffin: 2.85519542360442e-169| (4) Macrophage: 8.03845973658587e-111| (5) E NOR Chromaffin: 3.19407977577196e-110| (6) E Glia|SCP: 3.00740617864984e-97| (7) Cortex ZG: 4.43231495470281e-102| (8) Cycling TH+: 1.66886167559861e-87| (9) Cortex X Zone: 4.28133136941509e-85| (10) E Neuroblast: 6.9…	(0) E ADR Chromaffin: 2.78813984630405e-192| (1) PN NOR Chromaffin: 3.43393256125426e-163| (2) PN ADR Chromaffin: 1.09262618470494e-164| (4) Macrophage: 3.07615777199668e-106| (5) E NOR Chromaffin: 1.22231044859241e-105| (6) E Glia|SCP: 1.15087419644572e-92| (7) Cortex ZG: 1.69615828686567e-97| (8) Cycling TH+: 6.38639986018074e-83| (9) Cortex X Zone: 1.63837988844777e-80| (10) E Neuroblast: 2.64…	(0) E ADR Chromaffin: 6.96456536740043| (1) PN NOR Chromaffin: 7.44489783263732| (2) PN ADR Chromaffin: 7.2524070081224| (4) Macrophage: 5.63626013149392| (5) E NOR Chromaffin: 6.69617509147344| (6) E Glia|SCP: 6.13928867051019| (7) Cortex ZG: 9.01081839656732| (8) Cycling TH+: 5.93244577909711| (9) Cortex X Zone: 6.8735430887996| (10) E Neuroblast: 5.3974503441329| (11) PN Sustentacular: 4.66719…	(0) E ADR Chromaffin: 0.044| (1) PN NOR Chromaffin: 0.063| (2) PN ADR Chromaffin: 0.053| (4) Macrophage: 0.117| (5) E NOR Chromaffin: 0.063| (6) E Glia|SCP: 0.051| (7) Cortex ZG: 0.023| (8) Cycling TH+: 0.072| (9) Cortex X Zone: 0.053| (10) E Neuroblast: 0.096| (11) PN Sustentacular: 0.112| (12) Cortex ZF: 0.045| (13) Macrophage: 0.095| (14) Cortex ZG: 0.078| (15) Dendritic cell: 0.051| (16) T ce…
Upp1	(3) Endothelial	7.36364	2.18062e-11	8.34481e-07	0.689	0.0298421	(0) E ADR Chromaffin: 1.14410996857347e-195| (1) PN NOR Chromaffin: 1.04845331385279e-166| (2) PN ADR Chromaffin: 2.33591125961235e-168| (4) Macrophage: 1.48462893888025e-105| (5) E NOR Chromaffin: 8.02241445005059e-109| (6) E Glia|SCP: 2.2200639090331e-92| (7) Cortex ZG: 1.8935517822126e-88| (8) Cycling TH+: 1.65625659003952e-85| (9) Cortex X Zone: 1.18810506105142e-80| (10) E Neuroblast: 4.3614…	(0) E ADR Chromaffin: 4.37828002773694e-191| (1) PN NOR Chromaffin: 4.01222114145184e-162| (2) PN ADR Chromaffin: 8.93906520828456e-164| (4) Macrophage: 5.68137802330693e-101| (5) E NOR Chromaffin: 3.07001756174536e-104| (6) E Glia|SCP: 8.49574056708787e-88| (7) Cortex ZG: 7.24624396017118e-84| (8) Cycling TH+: 6.33816271876324e-81| (9) Cortex X Zone: 4.54664044763159e-76| (10) E Neuroblast: 1.66…	(0) E ADR Chromaffin: 7.68023453170381| (1) PN NOR Chromaffin: 8.35815484334642| (2) PN ADR Chromaffin: 8.92225806632249| (4) Macrophage: 7.89336112298793| (5) E NOR Chromaffin: 7.68034419080054| (6) E Glia|SCP: 6.51948968578393| (7) Cortex ZG: 6.90327708404585| (8) Cycling TH+: 7.14631979420123| (9) Cortex X Zone: 8.13512044943629| (10) E Neuroblast: 7.39263649032634| (11) PN Sustentacular: 7.93…	(0) E ADR Chromaffin: 0.012| (1) PN NOR Chromaffin: 0.024| (2) PN ADR Chromaffin: 0.015| (4) Macrophage: 0.09| (5) E NOR Chromaffin: 0.012| (6) E Glia|SCP: 0.022| (7) Cortex ZG: 0.038| (8) Cycling TH+: 0.027| (9) Cortex X Zone: 0.021| (10) E Neuroblast: 0.008| (11) PN Sustentacular: 0.04| (12) Cortex ZF: 0.009| (13) Macrophage: 0.01| (14) Cortex ZG: 0.01| (15) Dendritic cell: 0.051| (16) T cell: …
Tbxa2r	(3) Endothelial	6.4463	9.66347e-12	3.69802e-07	0.722	0.0980526	(0) E ADR Chromaffin: 2.28351502205225e-194| (1) PN NOR Chromaffin: 6.01402352314038e-180| (2) PN ADR Chromaffin: 1.95285633491209e-176| (4) Macrophage: 3.81863828701925e-116| (5) E NOR Chromaffin: 3.53619057583939e-109| (6) E Glia|SCP: 2.52133961975457e-92| (7) Cortex ZG: 4.6310008341996e-87| (8) Cycling TH+: 5.74079265042414e-87| (9) Cortex X Zone: 2.3644417370813e-67| (10) E Neuroblast: 1.0232…	(0) E ADR Chromaffin: 8.73855528638956e-190| (1) PN NOR Chromaffin: 2.30144652183536e-175| (2) PN ADR Chromaffin: 7.47319062244157e-172| (4) Macrophage: 1.46131649967653e-111| (5) E NOR Chromaffin: 1.35322940956222e-104| (6) E Glia|SCP: 9.64866245687677e-88| (7) Cortex ZG: 1.7721913992315e-82| (8) Cycling TH+: 2.19688653146431e-82| (9) Cortex X Zone: 9.04824563946272e-63| (10) E Neuroblast: 3.915…	(0) E ADR Chromaffin: 6.88931809221566| (1) PN NOR Chromaffin: 9.12518664651531| (2) PN ADR Chromaffin: 9.63596656107662| (4) Macrophage: 9.36704627990106| (5) E NOR Chromaffin: 6.39200049592531| (6) E Glia|SCP: 5.92591133763453| (7) Cortex ZG: 5.93422559058629| (8) Cycling TH+: 6.25768748412808| (9) Cortex X Zone: 4.77801558375782| (10) E Neuroblast: 7.60467400252735| (11) PN Sustentacular: 5.88…	(0) E ADR Chromaffin: 0.037| (1) PN NOR Chromaffin: 0.021| (2) PN ADR Chromaffin: 0.024| (4) Macrophage: 0.083| (5) E NOR Chromaffin: 0.047| (6) E Glia|SCP: 0.066| (7) Cortex ZG: 0.095| (8) Cycling TH+: 0.061| (9) Cortex X Zone: 0.171| (10) E Neuroblast: 0.024| (11) PN Sustentacular: 0.085| (12) Cortex ZF: 0.055| (13) Macrophage: 0.038| (14) Cortex ZG: 0.379| (15) Dendritic cell: 0.121| (16) T ce…
Ldb2	(3) Endothelial	5.51537	5.97332e-09	0.000228587	0.864	0.224158	(0) E ADR Chromaffin: 3.19668529553023e-192| (1) PN NOR Chromaffin: 3.20358929825288e-192| (2) PN ADR Chromaffin: 1.14005656914421e-165| (4) Macrophage: 2.46702601395649e-154| (5) E NOR Chromaffin: 8.19014830726248e-122| (6) E Glia|SCP: 5.57926891318979e-16| (7) Cortex ZG: 4.88780366520758e-121| (8) Cycling TH+: 1.5334451470237e-99| (9) Cortex X Zone: 5.0038646617926e-84| (10) E Neuroblast: 8.985…	(0) E ADR Chromaffin: 1.22330752889351e-187| (1) PN NOR Chromaffin: 1.22594955265541e-187| (2) PN ADR Chromaffin: 4.36276847880105e-161| (4) Macrophage: 9.44081515020871e-150| (5) E NOR Chromaffin: 3.13420595422321e-117| (6) E Glia|SCP: 2.13507462769947e-11| (7) Cortex ZG: 1.87046470660164e-116| (8) Cycling TH+: 5.8681878886303e-95| (9) Cortex X Zone: 1.91487892877479e-79| (10) E Neuroblast: 3.43…	(0) E ADR Chromaffin: 5.00799858247015| (1) PN NOR Chromaffin: 5.94201160064623| (2) PN ADR Chromaffin: 4.8076257413623| (4) Macrophage: 7.95184078078372| (5) E NOR Chromaffin: 4.92324875663026| (6) E Glia|SCP: 1.09624570313013| (7) Cortex ZG: 6.1751137842378| (8) Cycling TH+: 4.9322081344448| (9) Cortex X Zone: 4.12435796040745| (10) E Neuroblast: 5.33152029975684| (11) PN Sustentacular: 1.70306…	(0) E ADR Chromaffin: 0.183| (1) PN NOR Chromaffin: 0.136| (2) PN ADR Chromaffin: 0.215| (4) Macrophage: 0.108| (5) E NOR Chromaffin: 0.189| (6) E Glia|SCP: 0.833| (7) Cortex ZG: 0.085| (8) Cycling TH+: 0.219| (9) Cortex X Zone: 0.288| (10) E Neuroblast: 0.147| (11) PN Sustentacular: 0.545| (12) Cortex ZF: 0.027| (13) Macrophage: 0.076| (14) Cortex ZG: 0.068| (15) Dendritic cell: 0.081| (16) T ce…
F8	(3) Endothelial	7.15213	4.05022e-13	1.54994e-08	0.781	0.118632	(0) E ADR Chromaffin: 8.91319004327005e-190| (1) PN NOR Chromaffin: 3.41909412752421e-160| (2) PN ADR Chromaffin: 6.62160291432938e-152| (4) Macrophage: 2.02804146142847e-119| (5) E NOR Chromaffin: 5.00667395769363e-119| (6) E Glia|SCP: 1.21745408462736e-111| (7) Cortex ZG: 6.86681087462166e-99| (8) Cycling TH+: 2.96040122499759e-98| (9) Cortex X Zone: 9.88468186192085e-83| (10) E Neuroblast: 2.8…	(0) E ADR Chromaffin: 3.41089956575858e-185| (1) PN NOR Chromaffin: 1.30841894072097e-155| (2) PN ADR Chromaffin: 2.53395500325557e-147| (4) Macrophage: 7.76090906459448e-115| (5) E NOR Chromaffin: 1.9159539901302e-114| (6) E Glia|SCP: 4.65895329105196e-107| (7) Cortex ZG: 2.62779118550022e-94| (8) Cycling TH+: 1.13288634078208e-93| (9) Cortex X Zone: 3.78267005491987e-78| (10) E Neuroblast: 1.09…	(0) E ADR Chromaffin: 6.60398640631438| (1) PN NOR Chromaffin: 6.34879171887372| (2) PN ADR Chromaffin: 6.11280340651668| (4) Macrophage: 8.43550241046674| (5) E NOR Chromaffin: 7.1229390125594| (6) E Glia|SCP: 8.6882878546298| (7) Cortex ZG: 6.50925742935869| (8) Cycling TH+: 8.00859660260989| (9) Cortex X Zone: 6.86381525281175| (10) E Neuroblast: 6.09572831233637| (11) PN Sustentacular: 7.3581…	(0) E ADR Chromaffin: 0.099| (1) PN NOR Chromaffin: 0.132| (2) PN ADR Chromaffin: 0.155| (4) Macrophage: 0.174| (5) E NOR Chromaffin: 0.077| (6) E Glia|SCP: 0.034| (7) Cortex ZG: 0.103| (8) Cycling TH+: 0.083| (9) Cortex X Zone: 0.168| (10) E Neuroblast: 0.116| (11) PN Sustentacular: 0.094| (12) Cortex ZF: 0.182| (13) Macrophage: 0.076| (14) Cortex ZG: 0.107| (15) Dendritic cell: 0.121| (16) T ce…
Myo1c	(3) Endothelial	3.06372	4.00516e-08	0.00153269	0.886	0.569263	(0) E ADR Chromaffin: 2.86103767709076e-189| (1) PN NOR Chromaffin: 3.74857460743577e-140| (2) PN ADR Chromaffin: 8.5476034632438e-140| (4) Macrophage: 4.19256877021938e-56| (5) E NOR Chromaffin: 2.64383683017856e-123| (6) E Glia|SCP: 2.3164614401266e-69| (7) Cortex ZG: 8.63134221719908e-46| (8) Cycling TH+: 1.03499251427488e-95| (9) Cortex X Zone: 1.42103997126018e-51| (10) E Neuroblast: 1.12482…	(0) E ADR Chromaffin: 1.09486189826909e-184| (1) PN NOR Chromaffin: 1.43450453077352e-135| (2) PN ADR Chromaffin: 3.27099689331414e-135| (4) Macrophage: 1.60441221698755e-51| (5) E NOR Chromaffin: 1.01174347817273e-118| (6) E Glia|SCP: 8.86463463907647e-65| (7) Cortex ZG: 3.30304203967774e-41| (8) Cycling TH+: 3.9607093536271e-91| (9) Cortex X Zone: 5.43803576201845e-47| (10) E Neuroblast: 4.3044…	(0) E ADR Chromaffin: 4.91962700831182| (1) PN NOR Chromaffin: 3.98626382977308| (2) PN ADR Chromaffin: 3.91024867605034| (4) Macrophage: 1.84643097895236| (5) E NOR Chromaffin: 4.69111841685822| (6) E Glia|SCP: 2.55481663092773| (7) Cortex ZG: 1.90634495732291| (8) Cycling TH+: 4.24303388978938| (9) Cortex X Zone: 2.40906971741018| (10) E Neuroblast: 5.32985229492757| (11) PN Sustentacular: 3.16…	(0) E ADR Chromaffin: 0.272| (1) PN NOR Chromaffin: 0.474| (2) PN ADR Chromaffin: 0.452| (4) Macrophage: 0.738| (5) E NOR Chromaffin: 0.28| (6) E Glia|SCP: 0.595| (7) Cortex ZG: 0.835| (8) Cycling TH+: 0.372| (9) Cortex X Zone: 0.826| (10) E Neuroblast: 0.187| (11) PN Sustentacular: 0.473| (12) Cortex ZF: 0.827| (13) Macrophage: 0.895| (14) Cortex ZG: 0.883| (15) Dendritic cell: 0.778| (16) T cel…
Pcdh17	(3) Endothelial	6.10813	5.68941e-13	2.17722e-08	0.758	0.150737	(0) E ADR Chromaffin: 3.08234859291489e-189| (1) PN NOR Chromaffin: 3.87737491000505e-158| (2) PN ADR Chromaffin: 6.69322050145774e-157| (4) Macrophage: 2.00136861089821e-128| (5) E NOR Chromaffin: 8.30571172080317e-88| (6) E Glia|SCP: 3.13862406969017e-28| (7) Cortex ZG: 4.60130476136553e-103| (8) Cycling TH+: 1.26151783355939e-57| (9) Cortex X Zone: 2.3528194216727e-89| (10) E Neuroblast: 1.508…	(0) E ADR Chromaffin: 1.17955315953667e-184| (1) PN NOR Chromaffin: 1.48379383056073e-153| (2) PN ADR Chromaffin: 2.56136162149785e-152| (4) Macrophage: 7.65883740018529e-124| (5) E NOR Chromaffin: 3.17842976131696e-83| (6) E Glia|SCP: 1.20108865898903e-23| (7) Cortex ZG: 1.76082730607936e-98| (8) Cycling TH+: 4.82757644546508e-53| (9) Cortex X Zone: 9.00376936285709e-85| (10) E Neuroblast: 5.771…	(0) E ADR Chromaffin: 7.01458356978476| (1) PN NOR Chromaffin: 6.40168665466896| (2) PN ADR Chromaffin: 6.41408439364539| (4) Macrophage: 8.39314250081464| (5) E NOR Chromaffin: 4.54304969993858| (6) E Glia|SCP: 2.5016386968119| (7) Cortex ZG: 9.65084204455417| (8) Cycling TH+: 4.15321777085048| (9) Cortex X Zone: 7.91527924903681| (10) E Neuroblast: 4.53638280446132| (11) PN Sustentacular: 1.989…	(0) E ADR Chromaffin: 0.077| (1) PN NOR Chromaffin: 0.105| (2) PN ADR Chromaffin: 0.106| (4) Macrophage: 0.065| (5) E NOR Chromaffin: 0.197| (6) E Glia|SCP: 0.595| (7) Cortex ZG: 0.048| (8) Cycling TH+: 0.34| (9) Cortex X Zone: 0.056| (10) E Neuroblast: 0.143| (11) PN Sustentacular: 0.487| (12) Cortex ZF: 0.055| (13) Macrophage: 0.086| (14) Cortex ZG: 0.136| (15) Dendritic cell: 0.061| (16) T cel…
Prkcdbp	(3) Endothelial	3.77647	2.52867e-13	9.6767e-09	0.949	0.486158	(0) E ADR Chromaffin: 9.12903989172996e-187| (1) PN NOR Chromaffin: 1.21071367165585e-22| (2) PN ADR Chromaffin: 2.04329432780494e-147| (4) Macrophage: 5.87530634681226e-174| (5) E NOR Chromaffin: 5.84944994362931e-57| (6) E Glia|SCP: 9.63013088877865e-75| (7) Cortex ZG: 1.43290845065252e-112| (8) Cycling TH+: 1.84848146261595e-90| (9) Cortex X Zone: 7.6163402141513e-31| (10) E Neuroblast: 6.5323…	(0) E ADR Chromaffin: 3.49350098576722e-182| (1) PN NOR Chromaffin: 4.63315907869259e-18| (2) PN ADR Chromaffin: 7.81927873364394e-143| (4) Macrophage: 2.24836223279812e-169| (5) E NOR Chromaffin: 2.23846750442806e-52| (6) E Glia|SCP: 3.68525848851781e-70| (7) Cortex ZG: 5.48345405895707e-108| (8) Cycling TH+: 7.07376886113872e-86| (9) Cortex X Zone: 2.91462107315142e-26| (10) E Neuroblast: 2.499…	(0) E ADR Chromaffin: 3.70196215036017| (1) PN NOR Chromaffin: 0.889833405334301| (2) PN ADR Chromaffin: 3.16327019603386| (4) Macrophage: 7.16146602157609| (5) E NOR Chromaffin: 1.65974584688662| (6) E Glia|SCP: 2.31393261254109| (7) Cortex ZG: 3.757804247979| (8) Cycling TH+: 2.79514612921875| (9) Cortex X Zone: 1.39650121264748| (10) E Neuroblast: 5.62130316186991| (11) PN Sustentacular: 1.689…	(0) E ADR Chromaffin: 0.42| (1) PN NOR Chromaffin: 0.952| (2) PN ADR Chromaffin: 0.596| (4) Macrophage: 0.25| (5) E NOR Chromaffin: 0.685| (6) E Glia|SCP: 0.672| (7) Cortex ZG: 0.516| (8) Cycling TH+: 0.436| (9) Cortex X Zone: 0.932| (10) E Neuroblast: 0.135| (11) PN Sustentacular: 0.728| (12) Cortex ZF: 0.882| (13) Macrophage: 0.181| (14) Cortex ZG: 0.388| (15) Dendritic cell: 0.172| (16) T cell…
Fas	(3) Endothelial	6.1217	4.25346e-09	0.000162771	0.645	0.0778421	(0) E ADR Chromaffin: 7.41179833124791e-181| (1) PN NOR Chromaffin: 6.07865446949859e-153| (2) PN ADR Chromaffin: 1.29098204367469e-152| (4) Macrophage: 2.26178549609926e-96| (5) E NOR Chromaffin: 4.39632545561993e-101| (6) E Glia|SCP: 6.74226596276549e-57| (7) Cortex ZG: 2.5031803397106e-74| (8) Cycling TH+: 8.35701594132033e-76| (9) Cortex X Zone: 6.23475386683158e-65| (10) E Neuroblast: 6.7885…	(0) E ADR Chromaffin: 2.83634698540195e-176| (1) PN NOR Chromaffin: 2.32617949238772e-148| (2) PN ADR Chromaffin: 4.94033008473431e-148| (4) Macrophage: 8.65540073647263e-92| (5) E NOR Chromaffin: 1.68238582535664e-96| (6) E Glia|SCP: 2.5801303386311e-52| (7) Cortex ZG: 9.57917052400453e-70| (8) Cycling TH+: 3.19806286042447e-71| (9) Cortex X Zone: 2.38591560975911e-60| (10) E Neuroblast: 2.59782…	(0) E ADR Chromaffin: 8.57853850525681| (1) PN NOR Chromaffin: 9.04598405396389| (2) PN ADR Chromaffin: 8.81503807709483| (4) Macrophage: 6.59734014630111| (5) E NOR Chromaffin: 9.4322582505364| (6) E Glia|SCP: 3.92687814783783| (7) Cortex ZG: 6.7957566128541| (8) Cycling TH+: 6.80501385452399| (9) Cortex X Zone: 6.061986298982| (10) E Neuroblast: 7.56576491287498| (11) PN Sustentacular: 3.721818…	(0) E ADR Chromaffin: 0.011| (1) PN NOR Chromaffin: 0.022| (2) PN ADR Chromaffin: 0.017| (4) Macrophage: 0.068| (5) E NOR Chromaffin: 0.004| (6) E Glia|SCP: 0.16| (7) Cortex ZG: 0.073| (8) Cycling TH+: 0.032| (9) Cortex X Zone: 0.068| (10) E Neuroblast: 0.008| (11) PN Sustentacular: 0.161| (12) Cortex ZF: 0.073| (13) Macrophage: 0.029| (14) Cortex ZG: 0.107| (15) Dendritic cell: 0.111| (16) T cel…
Nrp1	(3) Endothelial	4.05099	2.03435e-09	7.78505e-05	0.973	0.512053	(0) E ADR Chromaffin: 1.92851893945597e-179| (1) PN NOR Chromaffin: 6.44087969094706e-236| (2) PN ADR Chromaffin: 2.6114441256636e-228| (4) Macrophage: 1.165624616454e-91| (5) E NOR Chromaffin: 1.64712705560533e-125| (6) E Glia|SCP: 2.50559298108833e-81| (7) Cortex ZG: 3.72608470151502e-145| (8) Cycling TH+: 1.89016380487921e-95| (9) Cortex X Zone: 2.54451076121822e-77| (10) E Neuroblast: 2.13980…	(0) E ADR Chromaffin: 7.38005627751011e-175| (1) PN NOR Chromaffin: 2.46479584013162e-231| (2) PN ADR Chromaffin: 9.99347438008948e-224| (4) Macrophage: 4.46061228224618e-87| (5) E NOR Chromaffin: 6.30322581639049e-121| (6) E Glia|SCP: 9.58840322002884e-77| (7) Cortex ZG: 1.42589809357577e-140| (8) Cycling TH+: 7.23327884851176e-91| (9) Cortex X Zone: 9.7373337810299e-73| (10) E Neuroblast: 8.188…	(0) E ADR Chromaffin: 3.70683856380479| (1) PN NOR Chromaffin: 6.53921476681697| (2) PN ADR Chromaffin: 5.95749966630878| (4) Macrophage: 2.27552900108352| (5) E NOR Chromaffin: 3.55005129883099| (6) E Glia|SCP: 2.40856217526414| (7) Cortex ZG: 6.02432960203244| (8) Cycling TH+: 3.09169710256335| (9) Cortex X Zone: 2.57944195547169| (10) E Neuroblast: 2.80018826376183| (11) PN Sustentacular: 4.15…	(0) E ADR Chromaffin: 0.644| (1) PN NOR Chromaffin: 0.212| (2) PN ADR Chromaffin: 0.227| (4) Macrophage: 0.781| (5) E NOR Chromaffin: 0.606| (6) E Glia|SCP: 0.767| (7) Cortex ZG: 0.246| (8) Cycling TH+: 0.743| (9) Cortex X Zone: 0.762| (10) E Neuroblast: 0.737| (11) PN Sustentacular: 0.388| (12) Cortex ZF: 0.209| (13) Macrophage: 0.943| (14) Cortex ZG: 0.175| (15) Dendritic cell: 0.566| (16) T ce…
[truncated: 1,250 more rows]

## Sheet: Supplementary Table S2
Supplementary Table S2. Mouse postnatal glia specific DEG enriched GO terms
[truncated: 541 more rows]

## Sheet: Supplementary Table S3
Supplementary Table S3. List of patient samples clinical associated information
[truncated: 10 more rows]

[truncated: 4 more sheets: Supplementary Table S4, Supplementary Table S5, Supplementary Table S6, Supplementary Table S7]
